# Supplementary material for: Single-Cell Transcriptomics Unveils the Dedifferentiation Mechanism of Lung Adenocarcinoma Stem Cells
Source: Int J Mol Sci. 2022 Dec 28;24(1):482. doi: 10.3390/ijms24010482 (PMC9820263; doi:10.3390/ijms24010482)
Supplement: Supplementary file 1 [file ijms-24-00482-s001.zip › Supplementary tables.xlsx]

## Sheet: Summary
Table S1: mRNAsi scores of PC-9 and PC-9s. P represents PC-9 and PS represents PC-9s.
Table S2: DEGs of different cell clusters in PC-9s.
Table S3: DEGs of TCGA LUAD (CD44+ABCG2-ALCAM- vs CD44-ABCG2-ALCAM+) and PC-9s (C0 vs C2) and the intersected DEGs between them.
Table S4: DEGs between "C0 to C2" and "C2 to C0" in C2.
Table S5: GSEA GO BP of DEGs in Table S3.

## Sheet: Table S1
panel	score
fpkm_P1	0.52665
fpkm_P2	0.111271
fpkm_P3	0
fpkm_PS1	1
fpkm_PS2	0.985804
fpkm_PS3	0.893055

## Sheet: Table S2
gene	Gene ID	p_val	avg_log2FC	pct.1	pct.2	cluster		gene	Gene ID	p_val	avg_log2FC	pct.1	pct.2	cluster		gene	Gene ID	p_val	avg_log2FC	pct.1	pct.2	cluster		gene	Gene ID	p_val	avg_log2FC	pct.1	pct.2	cluster
CD44	960	5.34279e-26	49.2559	0.998	0.939	C0		ABCG2	9429	1.63498e-125	2.65657	0.587	0.3	C1		ALCAM	214	6.89436e-05	2.37843	0.505	0.548	C2		MOK	5891	4.32157e-56	227.08	0.048	0.285	C3
S100A11	6282	1.00665e-91	Inf	0.999	0.991	C0		RPS25	6230	0	Inf	1	0.975	C1		RAN	5901	6.27698e-46	110.489	1	0.969	C2		BET1	10282	0	113.8	0.317	0.908	C3
LCN2	3934	1.17408e-88	Inf	0.995	0.931	C0		RPLP1	6176	0	Inf	1	0.994	C1		PKM	5315	0.00360989	35.2518	1	0.954	C2		BATF	10538	6.27578e-244	50.3202	0.231	0.79	C3
PI3	5266	4.46864e-64	Inf	0.913	0.837	C0		PTMA	5757	0	494.955	1	0.99	C1		COX6A1	1337	1.16803e-11	32.5824	0.999	0.96	C2		MAFK	7975	1.68477e-71	50.3109	0.109	0.4	C3
MGST1	4257	5.77714e-48	Inf	0.998	0.993	C0		PSMB1	5689	1.97556e-305	380.593	0.999	0.955	C1		TMED2	10959	1.67237e-06	26.8129	0.997	0.933	C2		ZFAND2A	90637	1.24626e-225	49.8692	0.24	0.777	C3
KLK6	5653	1.12757e-40	Inf	0.995	0.944	C0		NPC2	10577	1.40541e-226	360.845	0.999	0.934	C1		PPP1CC	5501	4.88432e-24	22.4847	0.958	0.864	C2		FAM133B	257415	6.20988e-300	46.0783	0.286	0.87	C3
TPT1	7178	7.8587e-36	Inf	1	0.988	C0		SLIRP	81892	0	308.918	0.999	0.953	C1		RNF181	51255	1.77188e-05	20.7093	0.955	0.889	C2		YWHAG	7532	0	45.9934	0.597	0.992	C3
SPRR1B	6699	4.67887e-35	Inf	0.664	0.587	C0		PRDX1	5052	0	249.767	1	0.988	C1		NFYB	4801	7.2663e-13	15.7002	0.72	0.581	C2		PTPN12	5782	8.20291e-207	42.909	0.304	0.795	C3
AKR1B1	231	7.46394e-35	Inf	0.999	0.976	C0		NPM1	4869	0	242.554	1	0.983	C1		UBL3	5412	0.00425	15.2495	0.517	0.534	C2		SNX8	29886	1.20389e-169	38.4345	0.148	0.631	C3
SPRR3	6707	3.96164e-28	Inf	0.75	0.675	C0		RPSA	3921	0	231.455	1	0.975	C1		FHL2	2274	5.50018e-13	10.7279	0.395	0.481	C2		APTR	100505854	8.02802e-76	34.8524	0.065	0.364	C3
MGP	4256	8.2497e-15	Inf	0.823	0.762	C0		SNX3	8724	4.27774e-238	228.126	0.998	0.93	C1		CDK2AP1	8099	0.00142377	9.49875	0.97	0.883	C2		EIF2B2	8892	0	33.0092	0.36	0.926	C3
RPL37	6167	1.04641e-12	Inf	1	0.994	C0		UBE2C	11065	0	225.171	0.992	0.56	C1		PSMC2	5701	0.00450784	8.78069	0.938	0.839	C2		DAGLB	221955	2.62709e-47	31.6799	0.043	0.25	C3
RPL26	6154	1.62412e-12	Inf	1	0.993	C0		CSDE1	7812	7.28618e-259	218.028	1	0.963	C1		CPEB4	80315	8.14977e-09	7.40039	0.721	0.733	C2		FSCN1	6624	0	28.5989	0.475	0.973	C3
RPL7A	6130	1.9317e-12	Inf	1	0.995	C0		H3F3A	3020	0	200.715	1	0.982	C1		PSMC6	5706	1.77037e-08	7.13763	0.961	0.875	C2		SRGN	5552	1.14206e-82	27.2231	0.151	0.472	C3
RPL12	6136	7.45741e-12	Inf	1	0.992	C0		HIST1H4C	8364	0	183.403	0.987	0.645	C1		HES1	3280	0.00188185	6.2268	0.748	0.75	C2		RHBDD2	57414	3.12238e-200	24.76	0.215	0.727	C3
RPS13	6207	1.5183e-10	Inf	1	0.99	C0		BTF3	689	0	183.403	1	0.974	C1		PNMT	5409	0.0015904	6.08582	0.442	0.474	C2		CDK6	1021	3.68556e-55	23.6946	0.078	0.318	C3
CHCHD2	51142	2.35917e-10	Inf	1	0.996	C0		TUBA1B	10376	0	183.305	1	0.953	C1		FOXQ1	94234	8.15209e-13	5.29789	0.579	0.638	C2		RAC1	5879	0	22.9103	0.84	1	C3
RPL19	6143	2.8566e-10	Inf	1	0.986	C0		RPL13A	23521	1.47333e-251	179.075	1	0.98	C1		DENR	8562	1.29281e-08	4.90293	0.922	0.815	C2		CCZ1B	221960	8.98822e-100	21.3272	0.116	0.474	C3
RPS4X	6191	5.27474e-09	Inf	0.999	0.991	C0		BCAS2	10286	0	175.738	0.998	0.879	C1		LRIG3	121227	4.4283e-07	4.54838	0.205	0.27	C2		TMEM60	85025	8.40658e-144	19.9603	0.135	0.582	C3
RPL30	6156	1.22083e-08	Inf	1	0.994	C0		ACTG1	71	0	174.773	1	0.99	C1		NCEH1	57552	0.000192219	4.28718	0.6	0.519	C2		PDGFA	5154	1.56801e-101	19.6217	0.203	0.568	C3
EIF1	10209	3.33408e-07	Inf	0.999	0.964	C0		HDAC2	3066	0	174.734	0.994	0.859	C1		MYEOV	26579	1.69162e-05	3.97483	0.618	0.55	C2		TNFAIP2	7127	4.29081e-234	19.5213	0.244	0.786	C3
KRT6B	3854	8.85271e-56	805.27	0.797	0.678	C0		MRPL18	29074	0	174.291	0.997	0.907	C1		CAPRIN1	4076	0.0027948	3.89442	0.976	0.893	C2		PSMG3	84262	0	14.2542	0.399	0.952	C3
SAA2	6289	9.25227e-19	652.373	0.275	0.194	C0		RPS17	6218	0	170.415	1	0.973	C1		CD9	928	2.80323e-13	3.72979	1	0.967	C2		TMEM243	79161	4.25602e-88	11.9812	0.087	0.419	C3
KRT6A	3853	8.86262e-26	598.993	0.363	0.266	C0		PHGDH	26227	0	166.091	0.984	0.749	C1		PHF19	26147	6.78558e-82	3.63374	0.866	0.556	C2		CCZ1	51622	6.81624e-252	11.1371	0.227	0.799	C3
GADD45A	1647	6.97973e-16	594.665	0.531	0.585	C0		UQCRH	7388	0	161.759	1	0.979	C1		PARPBP	55010	2.13573e-34	3.62429	0.461	0.278	C2		YPEL5	51646	4.2707e-221	10.4403	0.239	0.765	C3
KRT16	3868	1.35554e-219	581.681	0.902	0.724	C0		TCP1	6950	0	155.992	0.997	0.913	C1		PSMD4	5710	0.00507883	3.21958	0.942	0.86	C2		PMS2	5395	1.01658e-136	10.268	0.147	0.581	C3
PERP	64065	2.31893e-50	470.593	1	0.963	C0		TMSB4X	7114	3.53679e-240	153.107	1	0.985	C1		C12orf45	121053	0.000154848	3.06765	0.808	0.716	C2		MRM2	29960	1.67541e-200	9.85976	0.19	0.709	C3
RPL6	6128	2.15604e-07	450.395	1	0.979	C0		ATP5MG	10632	0	151.664	1	0.965	C1		TNFAIP8	25816	7.37498e-06	2.91477	0.39	0.448	C2		WIPI2	26100	0	9.20422	0.35	0.922	C3
MT-ND2	4536	2.36864e-05	448.953	1	0.971	C0		SIVA1	10572	0	149.862	0.999	0.854	C1		CHMP3	51652	6.0871e-06	2.72632	0.943	0.887	C2		ALKBH1	8846	1.02992e-67	9.05927	0.061	0.335	C3
RND3	390	3.66191e-19	442.899	0.786	0.681	C0		HMGN2	3151	0	142.938	1	0.923	C1		WDR3	10885	1.69518e-22	2.44378	0.766	0.644	C2		USP42	84132	5.64311e-69	8.82939	0.078	0.36	C3
LGALS3	3958	3.24454e-174	430.198	0.998	0.958	C0		UBE2S	27338	0	141.635	0.999	0.9	C1		TOMM40	10452	7.38343e-12	2.28615	0.926	0.81	C2		DTX2	113878	1.12907e-112	8.82665	0.068	0.453	C3
SPP1	6696	0.00161844	420.099	0.464	0.444	C0		H2AFZ	3015	0	141.565	0.999	0.967	C1		WNT6	7475	3.61047e-06	2.19987	0.538	0.565	C2		CHCHD7	79145	1.11068e-88	8.48801	0.09	0.424	C3
SSR4	6748	3.64906e-55	412.885	1	0.946	C0		NQO1	1728	1.77614e-253	134.355	1	0.986	C1		AC239799.2		0.000149819	1.95707	0.253	0.204	C2		ZNF12	7559	1.01062e-95	8.12751	0.104	0.454	C3
OTUD1	220213	1.01538e-41	382.552	0.513	0.37	C0		MDH2	4191	0	134.339	1	0.953	C1		MTCH1	23787	0.000785578	1.94464	0.992	0.912	C2		PHTF2	57157	6.02954e-161	7.97267	0.148	0.622	C3
ZFAS1	441951	5.50385e-17	381.142	1	0.964	C0		HMGB2	3148	0	131.465	0.977	0.406	C1		ALG13	79868	1.82921e-06	1.87448	0.717	0.726	C2		FOXK1	221937	1.51206e-131	7.96583	0.128	0.552	C3
GLRX	2745	8.55869e-129	378.261	0.948	0.831	C0		NDUFS6	4726	0	128.58	1	0.968	C1		WDR43	23160	1.8846e-20	1.85379	0.77	0.635	C2		RSBN1L	222194	4.55751e-235	7.92953	0.192	0.759	C3
GLTP	51228	5.05934e-10	366.527	0.809	0.719	C0		GSTM3	2947	1.47603e-167	121.367	1	0.957	C1		IPO5	3843	8.54499e-06	1.82972	0.708	0.615	C2		C7orf26	79034	1.04002e-76	7.40251	0.071	0.372	C3
S100P	6286	7.51399e-133	363.834	0.99	0.899	C0		RPL36A	6173	0	121.229	1	0.969	C1		PAK1IP1	55003	1.81197e-15	1.72897	0.714	0.578	C2		ZP3	7784	6.77447e-82	7.30077	0.102	0.42	C3
PRNP	5621	2.62282e-12	355.177	0.958	0.881	C0		PTMS	5763	1.05141e-138	118.482	0.999	0.913	C1		SF3B1	23451	0.00107689	1.56205	0.958	0.88	C2		AIMP2	7965	8.28165e-302	7.24069	0.381	0.91	C3
UBC	7316	8.13487e-51	355.174	0.998	0.926	C0		TUBA1C	84790	0	116.96	1	0.937	C1		PRPF31	26121	0.00111993	1.4364	0.872	0.775	C2		JDP2	122953	8.98938e-61	6.96465	0.081	0.34	C3
CEBPB	1051	7.05387e-187	353.735	0.998	0.948	C0		COA8	84334	1.56235e-297	114.154	0.997	0.884	C1		PRPF4	9128	4.96607e-05	1.39766	0.579	0.498	C2		AP5Z1	9907	1.29711e-83	6.76132	0.055	0.369	C3
LAGE3	8270	8.87869e-11	352.29	0.994	0.923	C0		HSPE1	3336	0	111.295	1	0.974	C1		CDKN2A	1029	0.00991249	1.32529	0.92	0.821	C2		RHOV	171177	2.72849e-118	5.70695	0.105	0.505	C3
KLK5	25818	8.43775e-100	345.079	0.997	0.931	C0		ERH	2079	0	111.189	1	0.955	C1		RPP25	54913	7.4523e-06	0.895246	0.456	0.379	C2		AC004982.2		2.7094e-145	4.67484	0.158	0.603	C3
RPL15	6138	1.28345e-09	343.636	1	0.987	C0		ISCA2	122961	2.22424e-247	111.051	0.993	0.872	C1		DIAPH3	81624	8.61459e-33	0.847827	0.534	0.325	C2		CROT	54677	8.19727e-126	2.6856	0.125	0.545	C3
SFN	2810	3.13808e-20	339.308	0.99	0.909	C0		HMGB1	3146	0	109.897	1	0.96	C1		KMT5A	387893	1.00181e-09	0.844307	0.704	0.594	C2		TMEM184A	202915	1.20698e-108	2.46738	0.108	0.488	C3
PHLDA1	22822	7.83773e-41	339.306	0.812	0.709	C0		SF3B5	83443	1.19535e-284	108.383	0.998	0.921	C1		SAFB2	9667	2.82734e-06	0.767653	0.575	0.494	C2		BRAT1	221927	8.61277e-115	2.24879	0.108	0.5	C3
RPS7	6201	1.41448e-05	337.865	0.999	0.985	C0		TUBB	203068	0	104.055	1	0.938	C1		SELENOK	58515	0.0013078	0.765235	0.902	0.808	C2		C1GALT1	56913	2.68285e-227	2.13997	0.219	0.758	C3
FGFBP1	9982	2.63512e-134	332.094	0.616	0.379	C0		CALM1	801	0	102.367	0.999	0.945	C1		SNRPA	6626	2.88747e-16	0.758029	0.869	0.743	C2		CCSER2	54462	2.42696e-159	1.69817	0.212	0.668	C3
KATNBL1	79768	0.00659474	327.771	0.57	0.565	C0		HNRNPA2B1	3181	0	101.17	1	0.96	C1		SMU1	55234	4.3422e-08	0.739465	0.661	0.571	C2		ANGEL1	23357	3.20879e-54	1.64531	0.069	0.307	C3
S100A12	6283	1.64595e-29	324.881	0.7	0.601	C0		CDK1	983	0	100.376	0.959	0.286	C1		TPR	7175	3.53299e-06	0.70423	0.834	0.738	C2		EIF2AK1	27102	4.27535e-298	1.29157	0.414	0.929	C3
TMEM45A	55076	2.84103e-34	324.881	0.846	0.739	C0		PRDX6	9588	3.06424e-285	96.8402	1	0.954	C1		HSD17B11	51170	3.46067e-19	0.689328	0.336	0.218	C2		EIF3B	8662	0	0.65182	0.547	0.982	C3
RACK1	10399	7.81507e-08	317.667	0.999	0.983	C0		TOP2A	7153	0	96.282	0.904	0.241	C1		GEMIN5	25929	0.00227703	0.683128	0.362	0.315	C2		VPS50	55610	3.95563e-99	0.366639	0.086	0.442	C3
CST3	1471	2.48245e-94	311.87	0.999	0.939	C0		NCL	4691	0	95.3989	1	0.945	C1		HDGF	3068	6.49291e-10	0.651376	0.992	0.914	C2		FAM241B	219738	7.73694e-89	0.36134	0.075	0.409	C3
HMGCS1	3157	3.84629e-92	304.683	0.971	0.882	C0		SIKE1	80143	4.59103e-221	93.7109	0.988	0.855	C1		NCAPG2	54892	3.25058e-52	0.63912	0.69	0.413	C2		RUNX1	861	8.50463e-66	0.337106	0.065	0.334	C3
UPP1	7378	3.33956e-47	298.912	0.738	0.774	C0		CENPW	387103	0	92.5093	0.989	0.597	C1		TCERG1	10915	1.41707e-06	0.600699	0.759	0.661	C2		RBAK	57786	5.42289e-47	-0.414686	0.072	0.287	C3
RTN4	57142	8.43654e-67	284.415	0.999	0.951	C0		GTF2H5	404672	1.24181e-155	89.628	0.993	0.9	C1		SCCPDH	51097	0.00197897	0.586932	0.228	0.264	C2		COQ2	27235	9.56043e-140	-0.509641	0.14	0.579	C3
TMSB10	9168	2.51503e-12	274.386	1	0.984	C0		MAL2	114569	0	86.7377	0.999	0.959	C1		TRIM28	10155	0.00184827	0.538498	0.858	0.759	C2		POMT2	29954	5.81917e-60	-0.544913	0.071	0.326	C3
TIMP1	7076	8.86975e-48	272.944	0.977	0.869	C0		TFPI2	7980	1.10053e-76	85.3	0.386	0.18	C1		CSKMT	751071	6.31969e-09	0.537323	0.462	0.38	C2		NBAS	51594	1.52355e-57	-0.559272	0.031	0.264	C3
H3F3B	3021	5.17563e-27	271.497	0.992	0.935	C0		EI24	9538	0	84.747	0.997	0.869	C1		KHDC4	22889	1.81202e-05	0.483301	0.33	0.272	C2		CASD1	64921	6.78879e-60	-0.559911	0.045	0.291	C3
ANXA2	302	1.85042e-30	265.73	0.998	0.94	C0		ATP1B1	481	2.57244e-81	83.0466	0.995	0.927	C1		LINC01135	100131060	0.00879491	0.445718	0.318	0.276	C2		FBXO46	23403	1.99335e-38	-0.616769	0.066	0.252	C3
CITED2	10370	3.28807e-110	255.605	0.778	0.575	C0		RPS11	6205	0	82.4146	1	0.983	C1		HSPA14	51182	8.82922e-10	0.434044	0.755	0.635	C2		HARS2	23438	1.43745e-43	-0.6321	0.058	0.258	C3
AKR1C1	1645	4.13977e-37	252.746	0.929	0.854	C0		CCNB1	891	1.17304e-297	81.1298	0.921	0.525	C1		HDHD5	27440	0.00876671	0.424862	0.58	0.514	C2		BIN3	55909	3.66778e-47	-0.63296	0.047	0.255	C3
INSIG1	3638	2.03178e-44	245.533	0.94	0.834	C0		LAS1L	81887	0	79.4341	0.994	0.899	C1		KIDINS220	57498	0.00515256	0.41972	0.355	0.312	C2		MYO9A	4649	4.41564e-40	-0.634565	0.064	0.255	C3
MT-ND1	4535	4.74215e-06	244.09	1	0.977	C0		COX7C	1350	3.00505e-292	79.3461	1	0.967	C1		ZNF487	642819	2.94384e-08	0.401772	0.349	0.275	C2		UCK1	83549	4.51222e-45	-0.638321	0.054	0.259	C3
RPS8	6202	0.000274963	244.09	1	0.986	C0		S100A4	6275	8.93788e-93	78.0865	0.992	0.905	C1		XRCC4	7518	1.64379e-09	0.397006	0.545	0.444	C2		SYNC	81493	1.06654e-41	-0.649414	0.058	0.252	C3
B2M	567	2.1471e-18	238.319	0.998	0.941	C0		CENPA	1058	0	76.9905	0.752	0.208	C1		PIMREG	54478	3.0219e-72	0.382858	0.462	0.208	C2		ASB3	51130	7.21666e-66	-0.651283	0.07	0.34	C3
CTSV	1515	8.59494e-08	236.85	0.527	0.565	C0		FUCA2	2519	3.97436e-178	76.7838	0.956	0.768	C1		CDK7	1022	4.16456e-07	0.377302	0.543	0.468	C2		PANK1	53354	1.32494e-41	-0.652589	0.062	0.257	C3
RPL32	6161	4.53814e-11	213.548	0.999	0.979	C0		CDKN3	1033	0	76.6438	0.984	0.657	C1		ELOA	6924	8.70014e-09	0.375544	0.462	0.374	C2		TRIT1	54802	7.72345e-45	-0.660683	0.05	0.252	C3
RPL9	6133	6.48006e-09	209.465	1	0.985	C0		AHSA1	10598	1.83853e-198	75.2012	0.992	0.879	C1		WNT5A	7474	1.25405e-12	0.357071	0.222	0.322	C2		DNAL1	83544	4.8304e-47	-0.661225	0.044	0.25	C3
MUCL1	118430	0.000199433	209.395	0.265	0.23	C0		ABRACL	58527	4.85774e-160	75.1867	0.985	0.888	C1		SCLT1	132320	1.1618e-16	0.344656	0.35	0.238	C2		TMEM260	54916	3.09055e-48	-0.662061	0.044	0.254	C3
TSC22D1	8848	3.88151e-81	203.694	0.966	0.852	C0		SPTBN1	6711	8.90999e-125	74.8161	0.973	0.851	C1		ZMYND19	116225	4.53498e-07	0.295523	0.557	0.475	C2		TTN-AS1	100506866	5.29247e-44	-0.662933	0.051	0.252	C3
MT-ND5	4540	1.13809e-06	203.693	0.999	0.945	C0		RRM2	6241	0	72.2193	0.965	0.319	C1		GPRC5B	51704	9.89384e-07	0.28403	0.37	0.297	C2		PRKX	5613	5.73866e-36	-0.667233	0.071	0.25	C3
IDS	3423	8.63602e-63	200.809	0.992	0.899	C0		PCNA	5111	0	70.9056	0.996	0.776	C1		AC139530.1		1.41478e-06	0.280234	0.29	0.229	C2		TRAPPC9	83696	1.16435e-41	-0.667367	0.058	0.252	C3
TUBB4B	10383	1.67396e-140	200.809	0.991	0.922	C0		LSM5	23658	0	67.9562	1	0.936	C1		ZNF121	7675	0.000221982	0.265778	0.32	0.268	C2		BAG4	9530	8.36932e-44	-0.66753	0.052	0.251	C3
NAMPT	10135	6.13642e-27	200.809	0.994	0.931	C0		RPA3	6119	0	66.545	0.999	0.937	C1		COA6-AS1	101927765	5.29324e-06	-0.251105	0.341	0.279	C2		SH3BP5L	80851	1.85126e-45	-0.667782	0.054	0.259	C3
MYL6	4637	4.22537e-14	187.825	0.999	0.96	C0		PPM1G	5496	0	65.7538	0.998	0.865	C1		ZBTB41	360023	0.00941066	-0.253876	0.336	0.367	C2		GRIPAP1	56850	1.19673e-46	-0.668828	0.05	0.257	C3
RPL13	6137	9.16658e-11	186.382	1	0.991	C0		H1F0	3005	2.53391e-211	65.1022	0.801	0.506	C1		TMEM128	85013	0.00579582	-0.254538	0.392	0.423	C2		SETDB1	9869	1.78067e-46	-0.669318	0.046	0.251	C3
PMAIP1	5366	1.90113e-14	184.939	0.477	0.548	C0		GUSB	2990	1.53506e-144	65.0885	0.781	0.51	C1		NUP133	55746	0.0030168	-0.255701	0.492	0.43	C2		VHL	7428	2.11708e-49	-0.675401	0.044	0.259	C3
DDIT3	1649	8.03832e-05	183.493	0.3	0.258	C0		NENF	29937	6.88053e-270	59.3305	0.999	0.934	C1		CCDC86	79080	9.98556e-06	-0.258382	0.481	0.402	C2		PFKM	5213	4.97321e-48	-0.679333	0.049	0.261	C3
DKK1	22943	7.73828e-43	180.611	0.671	0.546	C0		COX6B1	1340	0	57.8984	1	0.959	C1		MUC20	200958	5.37795e-06	-0.259029	0.273	0.329	C2		ZNF236	7776	6.67774e-49	-0.681124	0.04	0.251	C3
SLC3A2	6520	5.97953e-15	180.611	0.96	0.853	C0		RPL36AL	6166	4.61296e-267	57.8626	0.999	0.956	C1		PRPF18	8559	0.000470797	-0.260811	0.415	0.455	C2		DOP1B	9980	4.31112e-51	-0.681385	0.036	0.251	C3
SCD	6319	4.64024e-91	179.248	0.991	0.941	C0		TPX2	22974	0	57.686	0.856	0.314	C1		CHMP6	79643	1.38212e-07	-0.261273	0.195	0.265	C2		ATG4C	84938	1.27845e-42	-0.685139	0.063	0.262	C3
DYNLL1	8655	2.37593e-13	174.836	0.998	0.964	C0		EZR	7430	5.31005e-115	57.2831	0.997	0.943	C1		DDHD1	80821	0.00826297	-0.262351	0.239	0.272	C2		ASB6	140459	2.32431e-45	-0.686778	0.053	0.257	C3
LAMB3	3914	1.62827e-09	173.366	0.222	0.285	C0		SNRPB	6628	0	56.4205	1	0.953	C1		SMAP2	64744	0.000567857	-0.263729	0.232	0.277	C2		CIC	23152	5.7403e-49	-0.689994	0.045	0.258	C3
SOD1	6647	0.000163515	171.503	0.994	0.927	C0		TMEM59	9528	7.02385e-187	55.0294	1	0.946	C1		ZNF749	388567	1.43647e-05	-0.265104	0.342	0.28	C2		TYK2	7297	9.46001e-47	-0.690657	0.055	0.264	C3
CLDN4	1364	3.92629e-17	167.615	0.994	0.931	C0		COX7B	1349	0	54.9937	1	0.963	C1		DCP1A	55802	0.00863213	-0.265572	0.26	0.294	C2		ZNF468	90333	1.04748e-40	-0.691786	0.064	0.258	C3
SGK1	6446	1.81623e-32	167.58	0.36	0.24	C0		PTGES3	10728	0	54.987	1	0.95	C1		HGSNAT	138050	0.000322925	-0.265864	0.227	0.273	C2		TSC1	7248	5.3846e-51	-0.692708	0.051	0.274	C3
CNFN	84518	8.27797e-48	167.58	0.64	0.489	C0		ATP5MPL	9556	3.33548e-300	54.9771	1	0.933	C1		TEDC1	283643	6.67058e-07	-0.267333	0.317	0.243	C2		SPPL2B	56928	1.76097e-50	-0.693726	0.045	0.262	C3
H1FX	8971	3.49018e-136	166.276	0.803	0.828	C0		ASL	435	7.24524e-51	54.9115	0.565	0.372	C1		ADCK5	203054	0.000140754	-0.267413	0.221	0.27	C2		ANKRD52	283373	7.68313e-46	-0.693751	0.048	0.253	C3
S100A14	57402	2.01152e-85	166.184	1	0.971	C0		FBXO5	26271	0	54.2688	0.831	0.164	C1		COG7	91949	1.8925e-05	-0.268545	0.242	0.301	C2		FAM120B	84498	6.97959e-44	-0.69423	0.066	0.269	C3
BCAP31	10134	8.90022e-20	166.184	0.998	0.951	C0		PGK1	5230	0	53.6395	0.999	0.939	C1		HEXD	284004	0.000973619	-0.268759	0.238	0.28	C2		C6orf47	57827	1.33123e-51	-0.69478	0.045	0.267	C3
OLFML3	56944	4.94993e-09	166.184	0.985	0.93	C0		DBI	1622	0	53.5607	1	0.973	C1		ANO10	55129	6.62793e-05	-0.271866	0.212	0.264	C2		NLK	51701	2.97602e-39	-0.694988	0.064	0.251	C3
RPS15A	6210	0.00755924	166.184	1	0.992	C0		PTTG1	9232	1.24008e-251	53.5607	0.944	0.627	C1		CPLANE1	65250	0.00950308	-0.272989	0.275	0.307	C2		MADD	8567	1.91523e-43	-0.695247	0.052	0.25	C3
HSPB1	3315	2.834e-77	164.742	1	0.957	C0		ETFB	2109	0	53.5607	1	0.962	C1		DDX11	1663	1.61462e-05	-0.274629	0.328	0.262	C2		BTBD2	55643	1.32627e-45	-0.695751	0.059	0.266	C3
SLC30A1	7779	1.18736e-66	164.235	0.703	0.538	C0		DYNLT1	6993	0	53.5607	0.998	0.924	C1		STK11IP	114790	0.00207522	-0.274755	0.262	0.303	C2		MGRN1	23295	4.46023e-51	-0.696852	0.039	0.256	C3
PPP1R15A	23645	8.76314e-05	161.783	0.538	0.479	C0		EIF2S1	1965	0	52.2867	0.991	0.81	C1		SBF2	81846	0.000111228	-0.275557	0.222	0.272	C2		POLL	27343	3.04897e-48	-0.697397	0.042	0.25	C3
ARL4A	10124	2.84989e-92	157.231	0.914	0.742	C0		SET	6418	0	52.1182	1	0.96	C1		SECISBP2L	9728	4.76564e-05	-0.275569	0.284	0.335	C2		PYGO2	90780	2.48947e-45	-0.699517	0.048	0.25	C3
RPL27	6155	4.93259e-05	151.956	1	0.976	C0		RPL18	6141	0	52.1175	1	0.988	C1		NEDD1	121441	9.02655e-07	-0.275879	0.384	0.305	C2		ZNF507	22847	1.52424e-48	-0.700896	0.042	0.252	C3
SPTSSB	165679	7.66478e-66	148.872	0.899	0.8	C0		PPP1CB	5500	2.4392e-206	52.0918	1	0.954	C1		NUP85	79902	0.0038923	-0.275911	0.355	0.308	C2		DNAJC16	23341	2.29616e-47	-0.702155	0.046	0.254	C3
RPL18A	6142	3.24655e-14	147.429	1	0.983	C0		FAM107B	83641	9.88085e-109	51.8698	0.903	0.721	C1		DHX16	8449	0.000180001	-0.276055	0.455	0.388	C2		IRAK4	51135	1.52543e-50	-0.702565	0.042	0.258	C3
GNAS	2778	6.16806e-50	144.544	1	0.962	C0		ALDH3A1	218	1.83638e-27	50.6753	0.483	0.354	C1		EXOSC6	118460	7.72783e-12	-0.278346	0.668	0.555	C2		PIK3R4	30849	2.62588e-51	-0.70317	0.06	0.285	C3
KRT23	25984	6.27366e-46	144.544	0.615	0.472	C0		PSME2	5721	0	50.5367	0.999	0.923	C1		TGFB1	7040	0.000806827	-0.27956	0.331	0.366	C2		TGFBRAP1	9392	8.27346e-45	-0.703204	0.054	0.256	C3
FAM50A	9130	3.32976e-07	141.607	0.975	0.877	C0		GLRX5	51218	0	50.1543	0.992	0.853	C1		DUS4L	11062	0.00225732	-0.280872	0.406	0.357	C2		RANBP3	8498	9.47013e-50	-0.70602	0.051	0.269	C3
YBX1	4904	1.05521e-28	137.327	1	0.958	C0		WTAP	9589	6.07222e-258	49.2064	0.958	0.765	C1		CIT	11113	2.38899e-28	-0.281085	0.306	0.166	C2		LZTFL1	54585	5.89113e-45	-0.707223	0.052	0.255	C3
RPL29	6159	4.863e-27	135.888	0.999	0.977	C0		VAPA	9218	6.55026e-228	49.1625	0.998	0.932	C1		OXSM	54995	0.00592726	-0.281881	0.243	0.275	C2		DENND4C	55667	1.18182e-44	-0.709596	0.05	0.251	C3
ATP5F1E	514	2.36329e-34	134.445	1	0.98	C0		ENY2	56943	0	49.1611	0.999	0.943	C1		FBXO33	254170	1.93611e-05	-0.281883	0.266	0.325	C2		ANKEF1	63926	3.03052e-48	-0.710241	0.051	0.264	C3
EIF4A1	1973	5.52977e-06	133.002	0.999	0.962	C0		ST14	6768	3.66139e-155	49.055	0.786	0.518	C1		DMWD	1762	0.00320563	-0.284324	0.257	0.294	C2		TUBG2	27175	9.2522e-52	-0.710244	0.044	0.265	C3
ODC1	4953	1.99443e-101	132.989	0.522	0.708	C0		RBM25	58517	2.4377e-265	48.4765	0.986	0.831	C1		PEX10	5192	0.000327594	-0.284892	0.209	0.252	C2		RNF25	64320	5.81694e-46	-0.710531	0.053	0.26	C3
CETN2	1069	1.6902e-21	131.127	0.973	0.862	C0		SELENOW	6415	0	47.7899	1	0.964	C1		NUDT12	83594	0.00130858	-0.285405	0.277	0.317	C2		ZNF219	51222	6.27939e-47	-0.71261	0.051	0.259	C3
NEAT1	283131	1.25494e-207	130.117	0.993	0.891	C0		DYNC1H1	1778	2.12067e-220	47.7899	0.996	0.874	C1		RECQL4	9401	1.28472e-06	-0.287929	0.379	0.298	C2		MPND	84954	1.57474e-43	-0.713722	0.064	0.265	C3
HSPA5	3309	1.67991e-102	130.037	0.969	0.85	C0		AKR1B10	57016	1.12381e-172	47.7899	1	0.96	C1		EEF1AKMT2	399818	3.45987e-09	-0.288706	0.59	0.499	C2		ZC3H7B	23264	2.37194e-42	-0.715221	0.057	0.251	C3
DSC2	1824	4.79684e-17	125.258	0.634	0.55	C0		MT-CYB	4519	4.80764e-307	47.7198	1	0.984	C1		FN3KRP	79672	7.76108e-07	-0.290362	0.463	0.377	C2		CEP104	9731	2.28976e-44	-0.715264	0.064	0.269	C3
HSPA1A	3303	1.549e-07	124.346	0.98	0.883	C0		CYC1	1537	0	46.5878	1	0.931	C1		CDH3	1001	0.00882485	-0.29064	0.314	0.275	C2		OSBPL10	114884	1.35652e-44	-0.716884	0.049	0.25	C3
KRT7	3855	1.28373e-116	124.336	0.998	0.959	C0		MPC2	25874	0	46.3375	0.999	0.932	C1		CASP7	840	0.004364	-0.292157	0.293	0.33	C2		SNX18	112574	1.996e-37	-0.719035	0.07	0.253	C3
SEC61G	23480	1.65875e-27	117.133	1	0.983	C0		RANBP1	5902	0	46.1641	0.999	0.926	C1		CDC42BPG	55561	0.000134554	-0.292249	0.206	0.252	C2		BTAF1	9044	1.34319e-50	-0.720769	0.045	0.263	C3
SNHG29	125144	1.31798e-36	117.13	1	0.962	C0		TMED10	10972	1.42814e-227	46.1327	1	0.955	C1		WDHD1	11169	1.29073e-08	-0.292254	0.31	0.228	C2		IQCG	84223	1.12747e-47	-0.721011	0.055	0.268	C3
PHLDA2	7262	7.55728e-27	116.133	0.988	0.926	C0		MARCKS	4082	4.29437e-178	45.8849	0.997	0.927	C1		SLC7A6	9057	0.00300934	-0.292749	0.372	0.322	C2		IPO11	51194	5.63253e-48	-0.722829	0.045	0.254	C3
DUSP1	1843	7.79503e-06	115.887	0.556	0.492	C0		CENPF	1063	0	44.9564	0.915	0.381	C1		FBXO34	55030	0.00305066	-0.293545	0.262	0.298	C2		MIIP	60672	3.32572e-47	-0.722938	0.052	0.262	C3
SERPINE2	5270	2.44885e-17	115.69	0.916	0.841	C0		EIF5	1983	0	44.9045	1	0.935	C1		ACADS	35	0.00657946	-0.295164	0.286	0.317	C2		EEFSEC	60678	7.20079e-47	-0.723213	0.047	0.254	C3
CAV1	857	1.28753e-52	115.682	0.36	0.52	C0		TMEM167A	153339	2.27011e-270	44.9043	0.999	0.919	C1		SIRT6	51548	0.00882673	-0.295579	0.274	0.306	C2		MED17	9440	2.38172e-53	-0.724973	0.049	0.278	C3
ATP6AP1	537	5.11243e-72	112.861	0.993	0.887	C0		EIF1AX	1964	0	44.8767	1	0.929	C1		DHRS12	79758	5.42842e-09	-0.295878	0.278	0.357	C2		POLR1E	64425	8.21939e-45	-0.726053	0.058	0.262	C3
MSMO1	6307	4.90225e-282	111.362	0.99	0.91	C0		CCNA2	890	0	44.8147	0.911	0.272	C1		CDK2	1017	1.43076e-05	-0.296782	0.331	0.265	C2		SENP7	57337	3.28437e-49	-0.726307	0.046	0.259	C3
CRABP2	1382	2.72769e-82	109.919	0.988	0.898	C0		ARL6IP1	23204	4.04721e-294	44.5546	0.997	0.922	C1		RCC1L	81554	8.46324e-09	-0.297866	0.622	0.523	C2		RNF31	55072	4.09184e-53	-0.727226	0.042	0.267	C3
NDUFA4	4697	2.86452e-14	108.467	0.999	0.963	C0		DUT	1854	0	44.4457	0.997	0.821	C1		PTEN	5728	0.00104021	-0.298111	0.21	0.251	C2		XXYLT1	152002	5.3714e-45	-0.727448	0.059	0.264	C3
FXYD3	5349	4.385e-112	107.034	0.997	0.952	C0		CD58	965	2.63028e-235	43.725	0.996	0.897	C1		OIP5	11339	2.38169e-28	-0.29833	0.311	0.169	C2		POLR3B	55703	8.12177e-45	-0.727886	0.059	0.264	C3
CBR1	873	1.37058e-05	107.021	0.935	0.853	C0		KPNA2	3838	0	43.7056	0.936	0.581	C1		SLC35B4	84912	0.000193171	-0.298791	0.21	0.256	C2		PHYKPL	85007	2.75378e-51	-0.72848	0.037	0.253	C3
SQSTM1	8878	7.30954e-16	104.152	0.996	0.91	C0		YBX3	8531	2.30609e-264	43.4618	1	0.943	C1		LSM14B	149986	0.00161708	-0.300259	0.413	0.366	C2		ENTPD4	9583	2.12432e-47	-0.728481	0.05	0.26	C3
KDELR2	11014	2.13504e-10	104.148	0.998	0.934	C0		BLVRB	645	1.30043e-242	43.4618	1	0.937	C1		ARPIN	348110	0.00819421	-0.300946	0.327	0.362	C2		CDK16	5127	4.83087e-46	-0.729124	0.054	0.261	C3
G6PD	2539	2.8831e-20	103.739	0.992	0.936	C0		AURKA	6790	0	43.3611	0.794	0.365	C1		ALS2	57679	0.00033979	-0.300978	0.251	0.297	C2		RNF214	257160	5.31837e-48	-0.729627	0.066	0.284	C3
NACA	4666	2.99821e-15	101.08	0.999	0.986	C0		CENPX	201254	0	43.1875	1	0.924	C1		N6AMT1	29104	0.000406403	-0.301305	0.206	0.25	C2		UBE2O	63893	6.99793e-49	-0.730936	0.068	0.289	C3
CIAO2B	51647	6.10344e-08	99.8204	0.998	0.939	C0		OAZ1	4946	0	43.0099	1	0.972	C1		BCKDHA	593	0.00267629	-0.301344	0.437	0.465	C2		AL451165.2		2.28537e-49	-0.731656	0.051	0.267	C3
SERPINB1	1992	3.72675e-09	99.817	0.846	0.757	C0		CKLF	51192	0	42.6935	0.999	0.855	C1		HEATR1	55127	4.76715e-06	-0.30136	0.556	0.477	C2		ZNF282	8427	4.78791e-47	-0.731828	0.058	0.268	C3
SOD2	6648	2.25948e-13	99.8107	0.869	0.778	C0		TSEN34	79042	0	42.4776	1	0.921	C1		RBL1	5933	0.00109289	-0.302431	0.266	0.218	C2		BLOC1S5	63915	8.59635e-48	-0.7319	0.044	0.253	C3
MAFF	23764	2.60186e-11	99.6301	0.479	0.402	C0		RPL35	11224	0	42.0192	1	0.985	C1		SDHAF4	135154	0.00252764	-0.302708	0.235	0.274	C2		HDAC10	83933	1.20687e-55	-0.733801	0.032	0.259	C3
PLK2	10769	3.31112e-28	96.935	0.867	0.75	C0		SNRPF	6636	0	41.8863	1	0.924	C1		RALGPS1	9649	2.83406e-05	-0.304922	0.218	0.272	C2		GIGYF1	64599	2.31827e-41	-0.735385	0.065	0.26	C3
BTG1	694	1.55245e-51	95.4922	0.875	0.762	C0		MKI67	4288	0	41.7534	0.908	0.315	C1		TIMELESS	8914	2.08326e-12	-0.305517	0.402	0.29	C2		AC008915.2		1.91313e-45	-0.735415	0.051	0.254	C3
ZFP36L2	678	4.27812e-72	95.492	0.955	0.853	C0		RHEB	6009	0	41.0284	1	0.956	C1		C2CD2	25966	0.000756168	-0.306261	0.22	0.261	C2		EPB41	2035	2.60068e-45	-0.735446	0.051	0.255	C3
HOPX	84525	1.37078e-120	95.4914	0.858	0.696	C0		TMEM205	374882	6.31163e-288	40.9615	0.999	0.931	C1		DZIP3	9666	5.73226e-07	-0.307011	0.451	0.374	C2		MAML2	84441	6.82544e-49	-0.735568	0.041	0.252	C3
ARF4	378	3.02098e-89	94.8362	0.989	0.874	C0		PPIA	5478	0	40.5765	1	0.985	C1		FBXO38	81545	0.00207195	-0.307651	0.29	0.332	C2		SAMD10	140700	3.30943e-48	-0.735761	0.048	0.259	C3
AGR2	10551	2.05856e-111	94.0496	0.958	0.882	C0		SFT2D1	113402	3.22277e-227	40.5764	0.994	0.89	C1		NAB1	4664	7.82537e-06	-0.308447	0.22	0.282	C2		ABL1	25	1.41467e-40	-0.73592	0.07	0.264	C3
PLAU	5328	0.000546268	94.0496	0.243	0.278	C0		TAGLN2	8407	0	40.5764	1	0.95	C1		PELP1	27043	5.45895e-07	-0.309877	0.455	0.373	C2		ZBTB25	7597	3.32088e-45	-0.735967	0.053	0.257	C3
EIF4A2	1974	8.50689e-64	94.046	0.977	0.846	C0		HNRNPA3	220988	0	40.5763	1	0.948	C1		ZFYVE19	84936	9.1522e-08	-0.310197	0.222	0.293	C2		PPP2R5D	5528	3.78132e-43	-0.73708	0.064	0.264	C3
PSMA7	5688	1.42238e-11	93.0316	1	0.958	C0		ATP1A1	476	4.46672e-164	40.576	1	0.954	C1		TMEM237	65062	1.15707e-10	-0.310198	0.579	0.47	C2		GHDC	84514	3.77658e-53	-0.737305	0.034	0.254	C3
VPS28	51160	4.03522e-81	92.5013	0.979	0.851	C0		PARP1	142	0	40.5648	0.983	0.775	C1		RGL3	57139	2.93673e-06	-0.310261	0.206	0.268	C2		AC106045.1		2.94605e-49	-0.737625	0.04	0.251	C3
DSTN	11034	9.1797e-21	92.1549	0.999	0.971	C0		HNRNPU	3192	0	40.2943	1	0.918	C1		C16orf58	64755	2.2102e-06	-0.311256	0.206	0.267	C2		N6AMT1	29104	1.67587e-41	-0.73767	0.071	0.269	C3
HSP90AB1	3326	1.28143e-23	92.1449	0.998	0.969	C0		MT2A	4502	0	39.1338	0.957	0.615	C1		ZDHHC21	340481	2.38653e-05	-0.311857	0.206	0.261	C2		MYO5C	55930	1.21838e-42	-0.738188	0.07	0.272	C3
COMT	1312	1.20678e-40	91.5057	0.992	0.917	C0		PPP2R5C	5527	4.33561e-185	39.1336	0.995	0.903	C1		ARSA	410	1.88394e-05	-0.31719	0.229	0.283	C2		CXXC1	30827	6.38393e-53	-0.738547	0.032	0.251	C3
EMD	2010	3.13091e-05	91.1642	0.888	0.818	C0		TIMM8B	26521	8.88607e-206	39.1225	0.98	0.831	C1		PPT1	5538	2.47633e-07	-0.318439	0.607	0.515	C2		RELCH	57614	7.28139e-52	-0.739503	0.039	0.258	C3
NME2	4831	9.73577e-07	91.1642	1	0.978	C0		ACAT2	39	1.26161e-206	38.9506	0.992	0.886	C1		C5orf22	55322	0.00871979	-0.318695	0.349	0.381	C2		JRK	8629	4.14717e-40	-0.739582	0.079	0.274	C3
VTN	7448	4.96426e-41	91.0921	0.408	0.276	C0		RAD21	5885	0	38.7584	0.997	0.861	C1		UMPS	7372	1.20419e-05	-0.319904	0.687	0.609	C2		EPS15L1	58513	1.42682e-50	-0.739619	0.044	0.261	C3
SQLE	6713	3.87105e-55	90.1639	0.964	0.876	C0		CKS1B	1163	0	38.4885	1	0.837	C1		PHF12	57649	0.000998494	-0.320555	0.277	0.322	C2		KANSL1-AS1	644246	3.42685e-41	-0.73992	0.058	0.25	C3
CYP51A1	1595	1.14505e-27	89.7177	0.969	0.89	C0		FAM83D	81610	0	38.399	0.641	0.138	C1		LINC02492	100506272	0.000533449	-0.322645	0.209	0.251	C2		C16orf95	100506581	3.25246e-53	-0.741097	0.058	0.289	C3
MT1X	4501	3.38585e-26	88.5357	0.31	0.419	C0		ACTB	60	0	37.6911	1	0.992	C1		NOL4L	140688	4.0379e-06	-0.323435	0.226	0.286	C2		SPEG	10290	9.70703e-48	-0.741193	0.044	0.251	C3
RPL34	6164	4.08436e-28	88.2788	0.998	0.97	C0		S100A13	6284	1.76237e-214	37.6862	1	0.943	C1		TAPBPL	55080	0.00794909	-0.32406	0.23	0.261	C2		MINK1	50488	2.19002e-45	-0.742694	0.05	0.254	C3
PFN1	5216	2.45795e-12	88.2788	0.999	0.964	C0		MRPL12	6182	0	37.6664	1	0.928	C1		RBPMS	11030	0.000277389	-0.32501	0.224	0.269	C2		RBBP9	10741	2.50161e-53	-0.743147	0.035	0.256	C3
KLF6	1316	2.13679e-06	88.2775	0.715	0.658	C0		LSM4	25804	0	36.9884	1	0.95	C1		PGBD2	267002	1.46369e-05	-0.325547	0.234	0.29	C2		PIP4K2B	8396	3.58118e-47	-0.743541	0.075	0.293	C3
ADM	133	2.68232e-23	88.1373	0.172	0.268	C0		DTYMK	1841	0	36.3707	0.998	0.815	C1		ZNF335	63925	0.000133918	-0.32624	0.258	0.308	C2		CNOT10	25904	3.78097e-48	-0.743606	0.054	0.268	C3
HSP90B1	7184	0.00309886	86.8361	0.996	0.93	C0		HNRNPAB	3182	0	36.2482	1	0.897	C1		TWSG1	57045	0.00331757	-0.327322	0.378	0.331	C2		EXTL2	2135	4.95626e-46	-0.743715	0.047	0.251	C3
CSTA	1475	7.72312e-08	86.6518	0.251	0.205	C0		RWDD1	51389	1.00125e-295	36.2386	0.997	0.897	C1		SFXN3	81855	0.000936564	-0.327457	0.21	0.25	C2		SETD1B	23067	3.18465e-47	-0.744585	0.057	0.268	C3
SQOR	58472	1.26603e-32	86.2657	0.844	0.716	C0		REXO2	25996	5.38693e-156	36.2222	0.987	0.879	C1		BRWD3	254065	0.00281613	-0.327762	0.217	0.253	C2		FAM193B	54540	2.17219e-49	-0.744937	0.054	0.271	C3
DHRS9	10170	7.54041e-69	86.0452	0.478	0.3	C0		CCT5	22948	0	36.2122	1	0.954	C1		NHLRC3	387921	0.000168121	-0.327907	0.271	0.321	C2		FDXR	2232	1.8168e-53	-0.745352	0.032	0.252	C3
IER2	9592	0.000134957	83.9507	0.929	0.8	C0		ATP6V0C	527	1.35668e-228	36.1958	1	0.928	C1		NDUFAF1	51103	0.00730994	-0.328831	0.314	0.346	C2		RBM45	129831	1.22517e-56	-0.745356	0.045	0.282	C3
RPL35A	6165	2.542e-07	83.9507	1	0.988	C0		PSMA3	5684	0	36.0604	0.999	0.925	C1		RAB4B	53916	4.99129e-06	-0.330078	0.259	0.321	C2		LPIN2	9663	1.91716e-37	-0.746348	0.069	0.252	C3
SNHG1	23642	2.26405e-36	83.9507	0.571	0.648	C0		TTF2	8458	0	35.8911	0.947	0.452	C1		ALG8	79053	0.00208737	-0.330942	0.492	0.431	C2		LEMD2	221496	1.54069e-55	-0.747406	0.042	0.274	C3
CLTB	1212	6.53614e-07	83.9502	0.993	0.901	C0		CDC42	998	1.2288e-243	35.7963	1	0.938	C1		HAUS2	55142	0.00971167	-0.33222	0.352	0.308	C2		UBR4	23352	2.17625e-52	-0.74795	0.055	0.282	C3
RARRES1	5918	2.74066e-15	83.9397	0.294	0.222	C0		HINT1	3094	0	34.9889	1	0.975	C1		RBM12B	389677	0.00029093	-0.332839	0.382	0.324	C2		UBR3	130507	3.24118e-53	-0.75006	0.042	0.266	C3
SAT1	6303	6.27307e-11	82.508	0.982	0.921	C0		JPT1	51155	0	34.8318	0.997	0.917	C1		MRPL1	65008	2.72143e-08	-0.334853	0.69	0.578	C2		RBSN	64145	2.69828e-47	-0.75056	0.049	0.259	C3
NDRG1	10397	4.25422e-33	82.3205	0.456	0.325	C0		ATAD2	29028	0	34.8113	0.968	0.39	C1		SPIDR	23514	0.000123905	-0.335056	0.218	0.266	C2		ATXN7L3	56970	1.15856e-40	-0.751552	0.072	0.267	C3
CREB5	9586	4.79701e-27	81.8282	0.708	0.588	C0		SNRNP70	6625	0	34.8057	0.991	0.829	C1		ZMYM3	9203	0.000222747	-0.335124	0.271	0.321	C2		ATP23	91419	2.02304e-43	-0.75218	0.059	0.259	C3
PPIF	10105	1.04376e-89	81.0654	0.824	0.818	C0		LY6E	4061	4.03709e-292	34.8057	1	0.949	C1		PGAM5	192111	0.000493465	-0.335549	0.409	0.354	C2		KBTBD7	84078	3.72882e-50	-0.75419	0.041	0.255	C3
TXNIP	10628	8.62302e-33	79.6227	0.892	0.824	C0		UQCRFS1	7386	0	34.796	0.999	0.928	C1		LEPR	3953	0.00112045	-0.336031	0.223	0.263	C2		IFT122	55764	4.51453e-57	-0.754573	0.026	0.254	C3
FDPS	2224	2.01898e-06	78.1799	0.986	0.889	C0		ARPC5	10092	0	34.7813	0.999	0.911	C1		PAQR4	124222	0.000369536	-0.336875	0.433	0.374	C2		CLASP2	23122	1.05542e-42	-0.755007	0.057	0.253	C3
RPL37A	6168	1.8146e-17	78.1799	1	0.979	C0		CAST	831	3.03469e-217	34.7356	0.999	0.934	C1		NAGLU	4669	0.00771813	-0.337167	0.302	0.335	C2		C12orf4	57102	1.48276e-46	-0.755188	0.053	0.261	C3
CST6	1474	8.70204e-71	78.1799	0.903	0.761	C0		SGO2	151246	0	34.0651	0.75	0.236	C1		ATG16L1	55054	0.00489602	-0.338963	0.355	0.306	C2		LRRC57	255252	4.34868e-49	-0.756387	0.049	0.263	C3
GUK1	2987	2.81644e-25	78.1798	1	0.948	C0		CDC42BPB	9578	8.21758e-56	33.6762	0.895	0.756	C1		CENPQ	55166	0.00239765	-0.33927	0.294	0.245	C2		AC083799.1		5.79321e-47	-0.757544	0.062	0.274	C3
SDC4	6385	1.2103e-49	78.1794	0.98	0.885	C0		VTA1	51534	4.43757e-128	33.4063	0.851	0.636	C1		FAM83B	222584	0.00102809	-0.340078	0.252	0.295	C2		ELP3	55140	1.63748e-50	-0.757905	0.05	0.269	C3
PHLDB2	90102	9.08823e-08	78.1787	0.752	0.731	C0		BAG5	9529	7.29186e-174	33.363	0.981	0.848	C1		S100PBP	64766	0.00105571	-0.34123	0.327	0.368	C2		ANKRD16	54522	1.28372e-53	-0.757971	0.047	0.275	C3
PIK3R3	8503	3.06542e-109	77.7708	0.901	0.735	C0		UQCRB	7381	7.8178e-286	33.3624	1	0.959	C1		ARHGAP42	143872	6.06491e-08	-0.346346	0.215	0.286	C2		GNL3L	54552	2.38653e-50	-0.758377	0.058	0.279	C3
TMEM154	201799	9.29194e-101	77.727	0.862	0.733	C0		BTF3L4	91408	0	33.3613	1	0.928	C1		CEP57L1	285753	0.00575993	-0.346695	0.365	0.315	C2		SLC35B4	84912	2.99394e-50	-0.758396	0.055	0.277	C3
RPS28	6234	1.4926e-07	76.7372	1	0.99	C0		NDC80	10403	0	33.1957	0.689	0.16	C1		GNB5	10681	7.18478e-07	-0.347328	0.198	0.262	C2		PRDM2	7799	1.45844e-51	-0.759586	0.042	0.261	C3
LYPD3	27076	8.34989e-128	76.7276	0.964	0.823	C0		RABIF	5877	5.30423e-231	32.8523	0.951	0.708	C1		DUSP22	56940	0.00358854	-0.348566	0.27	0.306	C2		PNPLA6	10908	3.7767e-48	-0.7596	0.054	0.268	C3
SNHG6	641638	2.70138e-07	76.6347	0.939	0.839	C0		ALYREF	10189	0	32.7321	1	0.901	C1		SRCAP	10847	0.00548313	-0.349571	0.315	0.353	C2		LMBR1L	55716	7.4936e-55	-0.760923	0.038	0.266	C3
RSRC2	65117	2.05541e-11	76.3646	0.84	0.785	C0		MB	4151	1.68821e-16	31.9843	0.417	0.324	C1		NUDCD1	84955	3.51232e-06	-0.350189	0.534	0.453	C2		TXNDC11	51061	4.15247e-46	-0.762385	0.06	0.268	C3
CKS2	1164	0	76.2782	0.723	0.849	C0		PABPC1	26986	7.25143e-232	31.9203	1	0.956	C1		CHKB-DT	100144603	0.00151471	-0.350486	0.226	0.266	C2		PLD1	5337	1.14288e-47	-0.762544	0.064	0.28	C3
MAP1LC3B	81631	1.03314e-22	75.2981	0.962	0.844	C0		AP2S1	1175	0	31.9203	1	0.96	C1		BTRC	8945	3.30182e-05	-0.351724	0.222	0.276	C2		CCDC97	90324	3.59335e-44	-0.763939	0.06	0.261	C3
CD59	966	1.05845e-51	73.554	0.999	0.921	C0		PCLAF	9768	0	31.9203	0.993	0.626	C1		STAT6	6778	2.67912e-06	-0.352404	0.231	0.29	C2		TSGA10	80705	2.06779e-46	-0.764065	0.053	0.26	C3
NDUFA13	51079	2.2217e-14	72.518	0.999	0.935	C0		MYBL2	4605	0	31.9194	0.986	0.467	C1		TMUB2	79089	0.00447875	-0.352447	0.414	0.449	C2		LIMD1	8994	1.68694e-58	-0.7643	0.026	0.259	C3
RPS24	6229	0.000325995	72.4092	0.999	0.988	C0		AL445524.1		1.18321e-120	31.8856	0.844	0.626	C1		RING1	6015	0.000574556	-0.353476	0.34	0.384	C2		FBXW9	84261	3.54474e-56	-0.765078	0.037	0.268	C3
CASP14	23581	1.19174e-101	71.884	0.559	0.348	C0		NDUFAF8	284184	0	31.8495	0.998	0.902	C1		RNF146	81847	0.000242622	-0.353707	0.292	0.336	C2		TOM1	10043	3.21878e-50	-0.766228	0.041	0.255	C3
KRT15	3866	1.38344e-50	70.9665	0.861	0.715	C0		SNRPD1	6632	0	31.8026	0.998	0.92	C1		DHDDS	79947	0.000101673	-0.357047	0.218	0.267	C2		AL022311.1		1.32921e-47	-0.767258	0.055	0.267	C3
FAU	2197	0.000708024	70.5038	1	0.987	C0		ZWINT	11130	0	31.5191	0.979	0.409	C1		BX255925.3		0.000527925	-0.35798	0.49	0.527	C2		MIGA2	84895	5.92878e-44	-0.768779	0.059	0.26	C3
C12orf57	113246	0.00825847	69.8274	0.892	0.825	C0		TPD52L1	7164	1.99063e-143	31.4656	0.991	0.882	C1		ALDH5A1	7915	1.50817e-10	-0.358417	0.539	0.596	C2		ABCB10	23456	1.51662e-42	-0.770787	0.071	0.272	C3
CTSL	1514	4.79499e-41	69.5214	0.941	0.806	C0		POLR2L	5441	5.51579e-300	31.4492	0.999	0.92	C1		ZCCHC9	84240	0.00919267	-0.359854	0.538	0.484	C2		SPSB1	80176	7.10774e-47	-0.770813	0.048	0.256	C3
DHCR7	1717	3.302e-53	68.8254	0.971	0.874	C0		VKORC1L1	154807	1.91142e-188	31.3349	0.783	0.454	C1		CCDC24	149473	0.00385945	-0.361185	0.303	0.341	C2		KDM4A	9682	2.67169e-51	-0.773211	0.052	0.276	C3
EGFR	1956	1.20567e-05	68.081	0.939	0.857	C0		ANAPC11	51529	0	30.9191	1	0.954	C1		TRMT61A	115708	0.00249187	-0.361541	0.546	0.494	C2		ATXN1L	342371	3.79401e-55	-0.773625	0.053	0.29	C3
TACSTD2	4070	3.73534e-67	67.6384	0.983	0.893	C0		GCLM	2730	4.48358e-287	30.9178	0.999	0.915	C1		CHD6	84181	7.32054e-05	-0.365349	0.373	0.424	C2		GMEB1	10691	1.49226e-45	-0.774019	0.05	0.254	C3
LDLR	3949	1.84227e-64	66.6368	0.887	0.773	C0		SAC3D1	29901	0	30.7579	0.993	0.751	C1		POLK	51426	0.000202937	-0.366215	0.237	0.283	C2		NKIRAS1	28512	9.49677e-51	-0.774631	0.059	0.282	C3
ID3	3399	0.00183688	66.6104	0.777	0.759	C0		ECI1	1632	0	30.5139	0.997	0.868	C1		EPHB2	2048	0.00281292	-0.368224	0.231	0.268	C2		PIGV	55650	2.44958e-54	-0.774687	0.047	0.277	C3
ITGA2	3673	2.79333e-14	66.5586	0.843	0.758	C0		MIF	4282	0	30.4776	1	0.973	C1		SLC39A13	91252	0.00153648	-0.368564	0.319	0.355	C2		SNIP1	79753	8.6266e-54	-0.775492	0.05	0.28	C3
SH3BGRL3	83442	1.31518e-91	65.0126	0.997	0.927	C0		HMGB3	3149	0	30.4776	0.992	0.827	C1		MED23	9439	1.4402e-05	-0.369532	0.264	0.319	C2		NAAA	27163	8.64453e-52	-0.775513	0.038	0.256	C3
PLAUR	5329	0.000268995	64.7437	0.819	0.727	C0		ATP5MC2	517	3.13519e-270	30.4776	1	0.963	C1		NSMCE4A	54780	0.000158687	-0.371493	0.482	0.41	C2		DUS2	54920	2.78497e-59	-0.775591	0.025	0.26	C3
IFITM3	10410	3.86037e-19	63.753	0.939	0.871	C0		MAN1A2	10905	9.07003e-132	30.4773	0.951	0.792	C1		POLR2B	5431	0.000335663	-0.371577	0.706	0.642	C2		ANKMY2	57037	1.2187e-54	-0.775647	0.049	0.282	C3
RABAC1	10567	4.24304e-108	63.7388	0.985	0.868	C0		PA2G4	5036	0	30.421	1	0.92	C1		RNF38	152006	8.95197e-06	-0.375835	0.236	0.292	C2		PLEKHM2	23207	1.31722e-45	-0.777946	0.068	0.278	C3
CD63	967	1.43114e-65	62.4934	1	0.979	C0		UBE2D2	7322	0	30.2061	0.999	0.894	C1		ERC1	23085	0.00315149	-0.376269	0.223	0.26	C2		ZNF710	374655	2.39378e-51	-0.778547	0.041	0.259	C3
RBM39	9584	0.00013979	62.0266	0.982	0.876	C0		PCMT1	5110	0	29.0353	0.996	0.876	C1		ANKRA2	57763	3.93619e-05	-0.378112	0.245	0.297	C2		RAP1GAP	5909	6.77918e-47	-0.779242	0.053	0.262	C3
WSB1	26118	0.00329558	61.823	0.688	0.611	C0		ANKRD9	122416	9.27613e-193	29.0349	0.912	0.681	C1		ADCY6	112	0.00584314	-0.379459	0.249	0.286	C2		PRR12	57479	1.83532e-51	-0.7795	0.047	0.268	C3
ROMO1	140823	2.56902e-23	61.7705	0.992	0.901	C0		RPS15	6209	0	29.0348	1	0.981	C1		SFT2D3	84826	0.000281686	-0.380274	0.325	0.37	C2		SPATA20	64847	4.45518e-51	-0.779596	0.037	0.253	C3
P4HB	5034	4.27839e-18	60.9476	0.998	0.925	C0		MZT2B	80097	0	28.8517	1	0.93	C1		ASB3	51130	0.00455126	-0.380661	0.275	0.31	C2		ORAI2	80228	4.83199e-47	-0.779716	0.06	0.271	C3
IDH3G	3421	1.24545e-21	60.2308	0.966	0.83	C0		AFDN	4301	1.43462e-169	28.85	0.9	0.691	C1		SAMD8	142891	0.00213513	-0.380813	0.281	0.319	C2		MTA2	9219	3.28806e-53	-0.780819	0.062	0.292	C3
YIF1A	10897	3.78554e-80	59.4247	0.99	0.878	C0		TYMS	7298	0	28.8163	0.966	0.339	C1		CASP6	839	0.000397846	-0.38135	0.486	0.418	C2		ZNF692	55657	1.62636e-57	-0.781372	0.04	0.277	C3
CHI3L2	1117	1.49292e-82	59.4178	0.7	0.551	C0		MAD2L1	4085	0	28.5639	0.974	0.403	C1		MDM2	4193	0.00402138	-0.381468	0.527	0.461	C2		ARHGAP39	80728	2.54597e-52	-0.781378	0.046	0.27	C3
SNHG12	85028	2.15769e-08	59.3986	0.323	0.376	C0		TMEM106C	79022	0	28.5025	0.999	0.856	C1		PTPN6	5777	0.00454162	-0.382678	0.325	0.361	C2		ACP2	53	6.59205e-48	-0.781687	0.044	0.252	C3
DGAT2	84649	6.89547e-91	59.0349	0.801	0.651	C0		TFDP1	7027	0	28.3433	0.976	0.675	C1		GRWD1	83743	1.05564e-07	-0.382955	0.473	0.382	C2		CRLF3	51379	4.04138e-50	-0.782895	0.052	0.272	C3
FBXO45	200933	1.74429e-11	58.9636	0.61	0.634	C0		NUDC	10726	0	28.3006	0.997	0.871	C1		TOR2A	27433	0.000361414	-0.383309	0.367	0.408	C2		TDRD3	81550	2.74857e-47	-0.783366	0.078	0.296	C3
RAB27B	5874	7.55362e-36	58.4672	0.748	0.628	C0		USP1	7398	0	28.2191	0.969	0.546	C1		SUN2	25777	2.04444e-14	-0.384604	0.606	0.484	C2		RXRB	6257	9.35082e-47	-0.784224	0.066	0.279	C3
AQP3	360	1.0983e-53	58.0426	0.736	0.594	C0		DHFR	1719	0	28.2111	0.989	0.558	C1		CCDC130	81576	0.00130698	-0.386196	0.266	0.308	C2		FOXRED1	55572	5.21769e-52	-0.784399	0.047	0.27	C3
RPS14	6208	6.57173e-14	57.9822	1	0.991	C0		H2AFV	94239	0	27.7121	1	0.916	C1		SNX27	81609	0.00893543	-0.386728	0.545	0.493	C2		TAMM41	132001	4.10456e-55	-0.784919	0.045	0.277	C3
CANX	821	0.00342172	57.9822	0.996	0.93	C0		SNRPG	6637	0	27.6373	1	0.951	C1		PITPNM1	9600	0.00633492	-0.38776	0.281	0.313	C2		VPS54	51542	7.66312e-47	-0.785121	0.07	0.283	C3
PPIC	5480	7.17475e-29	57.9822	0.967	0.875	C0		DEK	7913	0	27.6192	0.999	0.803	C1		KAZALD1	81621	3.80316e-05	-0.387924	0.238	0.291	C2		RMC1	29919	1.54908e-52	-0.78526	0.059	0.287	C3
CCT8	10694	3.85806e-05	57.9822	0.971	0.859	C0		CNIH4	29097	4.33984e-307	27.5922	1	0.939	C1		WDR5	11091	1.12468e-07	-0.388224	0.545	0.442	C2		CYTH1	9267	5.0041e-47	-0.785398	0.049	0.257	C3
APP	351	6.40633e-11	57.9636	0.857	0.762	C0		HDDC2	51020	3.82846e-220	27.5897	0.976	0.815	C1		N4BP3	23138	0.0066729	-0.388654	0.27	0.304	C2		KDM5C	8242	2.34328e-57	-0.78551	0.036	0.27	C3
KTN1	3895	2.54642e-28	57.8353	0.992	0.918	C0		ACTN4	81	1.08379e-258	27.5886	0.997	0.905	C1		DUSP28	285193	0.00164033	-0.38924	0.271	0.309	C2		AL096870.8		2.26106e-54	-0.785752	0.051	0.283	C3
DEGS1	8560	5.93905e-52	57.3669	0.954	0.825	C0		KIF20B	9585	0	27.5668	0.893	0.335	C1		ACAD8	27034	7.65683e-06	-0.389929	0.227	0.288	C2		PDE9A	5152	1.12689e-42	-0.786012	0.061	0.258	C3
MYL12A	10627	3.40361e-26	56.5396	0.995	0.922	C0		CARHSP1	23589	0	27.5489	0.998	0.853	C1		PCED1A	64773	1.3838e-07	-0.391014	0.194	0.261	C2		RAVER1	125950	3.72293e-56	-0.786037	0.041	0.274	C3
UBB	7314	1.10427e-05	56.5395	0.998	0.955	C0		PSAT1	29968	0	27.366	0.895	0.474	C1		RELB	5971	0.00255306	-0.391852	0.223	0.261	C2		CWF19L1	55280	3.32677e-53	-0.786848	0.034	0.254	C3
WARS	7453	0.000240698	56.4295	0.354	0.307	C0		PPIL4	85313	3.0151e-108	27.2618	0.74	0.485	C1		ZFP64	55734	0.00976878	-0.392358	0.373	0.405	C2		FCHO2	115548	2.48944e-53	-0.787983	0.062	0.295	C3
GRPEL2	134266	7.71061e-19	56.1246	0.244	0.33	C0		PTGES	9536	7.84511e-143	27.1318	0.835	0.584	C1		TCF3	6929	5.84339e-05	-0.392573	0.57	0.487	C2		TTI2	80185	7.36329e-55	-0.788013	0.046	0.277	C3
IL18	3606	1.20617e-175	56.0979	0.877	0.7	C0		ADIPOR1	51094	1.28281e-250	27.0474	0.998	0.884	C1		NOL11	25926	2.11654e-12	-0.393146	0.594	0.486	C2		DGKE	8526	9.04037e-49	-0.788114	0.061	0.279	C3
RPL11	6135	1.48507e-07	56.0876	0.999	0.994	C0		ACTL6A	86	0	27.0371	0.988	0.78	C1		FAAP100	80233	3.17385e-08	-0.393753	0.242	0.317	C2		SLC38A9	153129	2.74076e-52	-0.788177	0.062	0.291	C3
BST2	684	1.1025e-31	55.6445	0.98	0.905	C0		LINC00665	100506930	3.05064e-66	26.8328	0.434	0.236	C1		LETMD1	25875	2.72097e-05	-0.395229	0.537	0.567	C2		ARAF	369	1.00887e-51	-0.788654	0.052	0.276	C3
ZNF706	51123	8.6823e-05	55.5386	0.997	0.929	C0		CKB	1152	1.20275e-287	26.1495	0.972	0.792	C1		RFX1	5989	0.000887161	-0.395999	0.3	0.346	C2		COG8	84342	1.22826e-51	-0.789007	0.047	0.268	C3
ANXA1	301	3.08474e-44	55.0968	0.994	0.945	C0		GTF3C6	112495	2.42019e-210	26.1495	0.965	0.793	C1		PDIA5	10954	0.000451039	-0.401783	0.244	0.292	C2		CSNK1G1	53944	3.19785e-48	-0.790068	0.065	0.283	C3
TNFAIP3	7128	1.26104e-49	54.2251	0.494	0.337	C0		DDX24	57062	1.19387e-164	26.1489	0.891	0.666	C1		HOOK3	84376	0.00197659	-0.402266	0.326	0.367	C2		FZD3	7976	1.29161e-47	-0.790808	0.053	0.265	C3
EEF1G	1937	1.15143e-11	53.6803	1	0.975	C0		C20orf27	54976	0	26.1468	0.977	0.778	C1		TRIM4	89122	0.00216271	-0.402554	0.318	0.357	C2		CBX8	57332	1.46784e-57	-0.790861	0.043	0.281	C3
PYCARD	29108	1.78192e-121	53.6491	0.98	0.897	C0		VPS29	51699	0	26.1027	1	0.898	C1		SDHAF1	644096	0.00561397	-0.40427	0.572	0.515	C2		NFX1	4799	5.41161e-52	-0.79097	0.046	0.269	C3
AGPAT2	10555	2.30488e-10	53.6484	0.955	0.826	C0		YY1	7528	1.79394e-298	25.9693	0.991	0.836	C1		KAT5	10524	0.00362102	-0.404638	0.444	0.474	C2		EPM2AIP1	9852	2.76062e-49	-0.791203	0.051	0.267	C3
ELOVL1	64834	2.62659e-30	53.5079	0.922	0.802	C0		FAM49B	51571	0	25.9282	0.999	0.894	C1		VAMP5	10791	4.35265e-06	-0.4083	0.197	0.256	C2		MGAT2	4247	5.74589e-50	-0.791468	0.06	0.281	C3
PGRMC1	10857	5.38828e-12	53.4228	0.959	0.857	C0		YAP1	10413	1.75097e-163	25.8823	0.971	0.828	C1		HIRIP3	8479	5.20548e-10	-0.408321	0.402	0.301	C2		MTOR	2475	3.22837e-49	-0.7915	0.065	0.286	C3
S100A16	140576	4.59106e-67	53.2114	0.998	0.937	C0		ASF1A	25842	2.24985e-139	25.5264	0.722	0.435	C1		RGS14	10636	4.0787e-05	-0.409754	0.244	0.297	C2		INTS12	57117	6.40085e-56	-0.791578	0.053	0.29	C3
LAMTOR5	10542	3.72626e-59	53.1885	0.998	0.935	C0		AMD1	262	1.08147e-282	25.1462	0.972	0.75	C1		CAP2	10486	8.56048e-05	-0.41046	0.351	0.396	C2		MED22	6837	4.37411e-50	-0.791676	0.064	0.285	C3
CLIC1	1192	0.000583376	52.6344	0.998	0.951	C0		LSM2	57819	0	24.8307	0.999	0.855	C1		QTRT2	79691	0.000259278	-0.411623	0.373	0.319	C2		POLR2M	81488	1.15318e-51	-0.792471	0.042	0.262	C3
RHCG	51458	8.81273e-40	52.3151	0.335	0.21	C0		PRC1	9055	0	24.7343	0.944	0.366	C1		SLC48A1	55652	0.000884899	-0.413252	0.394	0.341	C2		ZNF623	9831	4.10385e-56	-0.793433	0.048	0.284	C3
CAMK2N1	55450	9.37681e-28	52.2114	0.989	0.907	C0		TOMM6	100188893	0	24.7089	1	0.955	C1		SMPD2	6610	0.000125163	-0.413328	0.275	0.32	C2		FKBPL	63943	2.55533e-53	-0.79344	0.042	0.267	C3
UCP2	7351	7.40394e-118	52.0436	0.916	0.797	C0		PSMG2	56984	0	24.7062	0.989	0.832	C1		CASD1	64921	2.39551e-05	-0.41466	0.214	0.268	C2		TRMT2A	27037	3.07061e-59	-0.793722	0.03	0.267	C3
OCIAD2	132299	1.55022e-11	52.0276	0.991	0.912	C0		TKT	7086	1.02577e-232	24.7016	1	0.95	C1		VPS37C	55048	0.000959243	-0.415462	0.374	0.414	C2		SKIV2L	6499	6.04019e-56	-0.7944	0.041	0.273	C3
OAS1	4938	4.53389e-12	51.912	0.431	0.353	C0		MRPL13	28998	0	24.6704	0.999	0.899	C1		RRNAD1	51093	0.000169129	-0.416701	0.262	0.31	C2		GATD1	347862	2.04838e-51	-0.794429	0.06	0.284	C3
IDI1	3422	1.27345e-30	51.2163	0.973	0.866	C0		JTB	10899	0	24.6136	1	0.92	C1		PEX11B	8799	1.05879e-12	-0.418824	0.169	0.263	C2		TOGARAM1	23116	3.63143e-49	-0.794785	0.049	0.264	C3
SERP1	27230	6.68634e-26	51.2098	0.996	0.917	C0		COMMD6	170622	2.38344e-210	24.5205	0.999	0.942	C1		C1RL	51279	0.000308333	-0.41939	0.246	0.293	C2		ZBTB24	9841	1.79903e-41	-0.794878	0.061	0.256	C3
LY6D	8581	4.83213e-72	50.7687	0.979	0.899	C0		GDAP2	54834	6.25993e-106	24.4981	0.84	0.64	C1		TINF2	26277	0.00014173	-0.420251	0.269	0.32	C2		NHEJ1	79840	5.04191e-56	-0.795196	0.044	0.278	C3
VMP1	81671	1.19175e-19	50.768	0.89	0.758	C0		SERINC1	57515	1.14907e-68	24.4912	0.856	0.683	C1		ERAL1	26284	0.000812591	-0.4209	0.52	0.468	C2		URB1-AS1	84996	2.4559e-50	-0.795362	0.062	0.284	C3
HIST1H1C	3006	6.50155e-20	50.698	0.55	0.589	C0		MCM7	4176	0	24.3954	0.979	0.501	C1		SPAG5	10615	2.764e-73	-0.421107	0.447	0.199	C2		PHKA1	5255	8.20869e-47	-0.79543	0.051	0.259	C3
RHOB	388	2.17558e-75	50.559	0.86	0.696	C0		CAMK2B	816	2.01116e-17	24.3881	0.354	0.256	C1		UBE2W	55284	0.00535604	-0.421875	0.436	0.462	C2		ANO10	55129	3.07067e-50	-0.79558	0.062	0.285	C3
NEU1	4758	9.05451e-16	50.3951	0.688	0.584	C0		PHF10	55274	5.99987e-176	24.3742	0.783	0.474	C1		IQSEC1	9922	0.000307929	-0.422145	0.242	0.285	C2		RUBCN	9711	3.07599e-45	-0.795614	0.054	0.259	C3
RMND5A	64795	0.00219506	49.8169	0.544	0.498	C0		BIRC5	332	0	24.1354	0.967	0.464	C1		GALK1	2584	1.13521e-06	-0.42217	0.345	0.409	C2		UNC119B	84747	2.43883e-48	-0.795738	0.052	0.266	C3
PMEPA1	56937	4.0945e-78	49.4528	0.892	0.749	C0		RAB11FIP1	80223	6.18658e-53	24.1059	0.899	0.757	C1		MEGF9	1955	5.07961e-06	-0.422214	0.593	0.62	C2		CCDC82	79780	2.36415e-50	-0.796155	0.052	0.271	C3
RPL23	9349	0.000778001	49.3256	0.998	0.955	C0		RBBP4	5928	0	24.0373	0.978	0.711	C1		GMPPB	29925	6.44624e-05	-0.424723	0.277	0.326	C2		LINC00667	339290	6.47704e-53	-0.797264	0.061	0.292	C3
CFB	629	7.42373e-68	49.3188	0.695	0.536	C0		NDUFS3	4722	0	23.9435	0.999	0.909	C1		ASCC1	51008	0.00473709	-0.4273	0.363	0.393	C2		CAPN10	11132	1.87803e-58	-0.798108	0.05	0.294	C3
ZFAND5	7763	3.99666e-11	49.3027	0.88	0.773	C0		F12	2161	4.33717e-248	23.9388	0.945	0.699	C1		NKAPD1	55216	0.00190152	-0.427618	0.31	0.348	C2		PCNX2	80003	7.34985e-54	-0.798318	0.038	0.263	C3
ATP2B4	493	2.72417e-135	49.2448	0.902	0.751	C0		BUB3	9184	0	23.8451	0.989	0.765	C1		NCOA1	8648	0.00925706	-0.427927	0.338	0.366	C2		SMG5	23381	3.89083e-41	-0.798344	0.073	0.27	C3
PLOD2	5352	3.79452e-86	48.9713	0.327	0.524	C0		ANLN	54443	0	23.7801	0.913	0.279	C1		HELZ2	85441	0.00026913	-0.432357	0.226	0.273	C2		MCF2L-AS1	100289410	8.41908e-51	-0.798467	0.037	0.252	C3
TP53BP2	7159	5.94829e-10	48.8665	0.353	0.41	C0		UBE2T	29089	0	23.292	0.995	0.636	C1		INAFM1	255783	2.07019e-06	-0.432754	0.23	0.292	C2		KDM2B	84678	1.25476e-53	-0.799609	0.069	0.305	C3
DDX21	9188	1.11097e-28	48.7064	0.919	0.857	C0		RPS9	6203	6.33204e-253	23.2641	1	0.985	C1		KIAA1671	85379	0.00138991	-0.434281	0.23	0.268	C2		PIP4K2A	5305	1.10583e-45	-0.800355	0.06	0.266	C3
GNAQ	2776	4.62598e-06	47.9772	0.819	0.732	C0		C9orf16	79095	7.04724e-143	23.2622	1	0.929	C1		ATP13A2	23400	0.00306451	-0.435906	0.282	0.317	C2		AC145207.5		3.35939e-43	-0.80081	0.067	0.268	C3
RPL17	6139	0.000150047	47.882	0.999	0.98	C0		PSMA5	5686	0	23.2606	0.998	0.925	C1		JAZF1	221895	3.36087e-09	-0.436022	0.178	0.254	C2		FBXO36	130888	1.20794e-55	-0.801145	0.042	0.273	C3
ATOX1	475	7.03986e-27	47.8572	0.997	0.932	C0		PRKDC	5591	0	23.193	0.994	0.781	C1		BMP1	649	0.000504698	-0.437964	0.235	0.277	C2		DMXL1	1657	5.73297e-55	-0.80183	0.057	0.291	C3
HIST3H2A	92815	1.50993e-67	47.8571	0.753	0.583	C0		BANF1	8815	0	23.1724	1	0.942	C1		SPACA9	11092	0.00261336	-0.438817	0.254	0.288	C2		ATXN7	6314	2.62087e-47	-0.802053	0.063	0.275	C3
TSC22D2	9819	0.000876878	47.2945	0.457	0.426	C0		LSR	51599	8.29929e-249	23.096	0.993	0.85	C1		PCMTD2	55251	0.00982977	-0.439136	0.351	0.385	C2		CAMKMT	79823	1.99593e-58	-0.802411	0.034	0.27	C3
COA6	388753	7.18759e-10	47.2831	0.981	0.888	C0		DEPDC1	55635	4.65723e-290	23.0878	0.625	0.194	C1		WDR12	55759	9.54688e-06	-0.43969	0.49	0.416	C2		WDR11	55717	4.76962e-62	-0.802477	0.035	0.283	C3
QPRT	23475	1.13243e-08	47.2361	0.274	0.22	C0		ATP5F1B	506	0	23.0705	1	0.945	C1		MT-ND6	4541	0.000689239	-0.44039	0.546	0.477	C2		ABCA2	20	5.58001e-49	-0.802763	0.044	0.256	C3
C3	718	5.76512e-119	47.2053	0.819	0.65	C0		NOP56	10528	0	23.0459	0.997	0.81	C1		FCHSD2	9873	0.000452777	-0.440825	0.222	0.265	C2		WASHC2A	387680	1.75712e-51	-0.803313	0.051	0.274	C3
METRN	79006	1.05165e-27	46.5507	0.97	0.857	C0		PRR13	54458	2.62823e-207	23.002	0.999	0.934	C1		DYRK1A	1859	0.00528508	-0.441225	0.26	0.295	C2		RAD54L2	23132	1.08923e-47	-0.803785	0.06	0.273	C3
PSCA	8000	1.77003e-77	46.4403	0.976	0.891	C0		ZFYVE21	79038	1.85938e-112	22.9171	0.98	0.858	C1		COG2	22796	0.00617847	-0.441534	0.462	0.492	C2		KLHL20	27252	2.02586e-50	-0.804451	0.044	0.26	C3
HIGD2A	192286	1.32188e-05	46.4363	0.992	0.916	C0		RBX1	9978	0	22.8092	0.999	0.949	C1		APPL2	55198	4.07994e-06	-0.442771	0.248	0.309	C2		AP3M2	10947	6.27535e-52	-0.804891	0.042	0.262	C3
EEF1D	1936	0.0085216	46.3706	0.999	0.983	C0		LSM3	27258	0	22.6215	0.998	0.875	C1		MSL3	10943	2.04007e-05	-0.446505	0.547	0.47	C2		PEX14	5195	2.29414e-61	-0.804998	0.045	0.297	C3
HIST1H2AC	8334	5.3437e-136	46.3627	0.677	0.42	C0		TMCO1	54499	6.07308e-227	22.3939	0.994	0.889	C1		TKFC	26007	1.42027e-05	-0.44704	0.388	0.434	C2		C16orf58	64755	1.25235e-51	-0.805502	0.061	0.286	C3
MAP4K3-DT	728730	2.9037e-06	45.9596	0.564	0.5	C0		GOPC	57120	1.10946e-67	22.1534	0.682	0.493	C1		SCRN2	90507	1.05036e-07	-0.447411	0.23	0.301	C2		CHMP6	79643	2.1952e-56	-0.80694	0.048	0.284	C3
ATP5MD	84833	7.24861e-13	44.9973	0.996	0.934	C0		CKAP2	26586	0	21.9606	0.8	0.358	C1		B9D1	27077	0.000457283	-0.453179	0.286	0.329	C2		AL591501.1		5.13142e-56	-0.807068	0.033	0.262	C3
B3GALNT2	148789	1.69883e-11	44.8764	0.491	0.538	C0		HNRNPA1	3178	0	21.8834	1	0.95	C1		LRRC14	9684	4.28879e-06	-0.454127	0.341	0.399	C2		LINC02492	100506272	4.02534e-43	-0.807139	0.069	0.271	C3
SNX5	27131	4.15497e-46	44.8749	0.85	0.815	C0		ATP5MC3	518	0	21.8214	1	0.974	C1		FUT3	2525	6.6443e-09	-0.457239	0.218	0.293	C2		CDC42BPG	55561	1.33429e-48	-0.807969	0.058	0.273	C3
PRDX5	25824	6.42059e-62	44.7626	1	0.943	C0		CLU	1191	2.14321e-75	21.8214	0.988	0.879	C1		ZNF414	84330	3.37904e-06	-0.457616	0.278	0.34	C2		PEX10	5192	9.89191e-61	-0.808448	0.034	0.277	C3
ERG28	11161	4.97556e-42	44.7121	0.918	0.788	C0		NDUFB4	4710	1.66993e-262	21.8214	1	0.95	C1		SLC25A46	91137	0.00286854	-0.457935	0.335	0.367	C2		CRTC3	64784	2.83545e-47	-0.80935	0.074	0.291	C3
XBP1	7494	1.54195e-161	44.5299	0.873	0.658	C0		VDAC2	7417	0	21.8201	1	0.947	C1		FAM122A	116224	2.76438e-06	-0.458515	0.257	0.318	C2		SMG6	23293	1.48787e-50	-0.810205	0.064	0.288	C3
PLXNA3	55558	1.94756e-26	43.6684	0.585	0.464	C0		SOX4	6659	9.69532e-120	21.8185	0.856	0.66	C1		ENDOD1	23052	9.55418e-06	-0.458523	0.211	0.268	C2		KLHL9	55958	5.12225e-46	-0.810569	0.076	0.29	C3
CLDN1	9076	0.00511986	43.5553	0.549	0.507	C0		RPL22L1	200916	6.00627e-220	21.8117	0.994	0.899	C1		KLHL35	283212	0.000553413	-0.459209	0.214	0.258	C2		KATNB1	10300	1.64439e-50	-0.811869	0.054	0.276	C3
HSPD1	3329	1.07058e-103	43.5553	0.996	0.952	C0		MEA1	4201	4.66662e-299	21.7735	0.988	0.812	C1		RASSF8-AS1	100506451	0.00011177	-0.46244	0.248	0.296	C2		SFXN3	81855	2.97127e-45	-0.812217	0.064	0.271	C3
CD55	1604	4.42019e-69	43.5553	0.614	0.448	C0		SUPT16H	11198	0	21.7583	0.969	0.671	C1		LIPH	200879	6.88742e-06	-0.465678	0.361	0.421	C2		ACTR3B	57180	2.71458e-55	-0.812233	0.05	0.284	C3
PPIB	5479	1.75841e-28	43.5552	0.992	0.901	C0		WDR20	91833	3.22277e-107	21.7457	0.832	0.617	C1		PICK1	9463	0.00851338	-0.466073	0.371	0.398	C2		METTL14	57721	2.4314e-54	-0.812493	0.066	0.302	C3
SSBP1	6742	0.00986733	43.5551	0.998	0.929	C0		EEF1E1	9521	0	21.7383	0.997	0.846	C1		LFNG	3955	8.31713e-05	-0.466726	0.22	0.269	C2		POGK	57645	5.74348e-49	-0.813301	0.068	0.288	C3
CYB5A	1528	1.88842e-15	43.5548	0.99	0.937	C0		PLK1	5347	0	21.7342	0.712	0.271	C1		PLEKHM1	9842	0.000834602	-0.467138	0.217	0.258	C2		POLR1A	25885	1.65219e-53	-0.813818	0.052	0.282	C3
SYTL2	54843	1.26712e-103	43.5539	0.818	0.64	C0		RPF2	84154	1.15963e-207	21.731	0.899	0.627	C1		SH3PXD2B	285590	2.75086e-06	-0.467397	0.234	0.295	C2		MAP3K4	4216	6.12731e-45	-0.814425	0.066	0.273	C3
SNHG5	387066	0.00020128	43.5525	0.607	0.541	C0		SFPQ	6421	0	21.6616	0.998	0.903	C1		SRCIN1	80725	0.00257691	-0.467502	0.233	0.27	C2		GLMN	11146	9.1804e-59	-0.814713	0.042	0.284	C3
TALDO1	6888	2.20683e-17	43.5289	0.996	0.938	C0		PLGRKT	55848	2.90908e-184	21.6194	0.954	0.777	C1		GEMIN8	54960	0.000280109	-0.467979	0.285	0.331	C2		ZNF302	55900	9.10934e-53	-0.814928	0.045	0.27	C3
CNBP	7555	1.12775e-07	43.5229	0.989	0.902	C0		LAPTM4B	55353	0	21.6117	1	0.926	C1		NIT1	4817	3.52784e-06	-0.468152	0.31	0.37	C2		MSL2	55167	1.21581e-54	-0.815148	0.059	0.294	C3
POLR2A	5430	1.43684e-05	43.5229	0.698	0.668	C0		CAPZA2	830	4.57902e-263	21.5765	0.996	0.895	C1		UTP6	55813	1.98278e-07	-0.468281	0.758	0.681	C2		NIPAL3	57185	7.08684e-54	-0.816781	0.034	0.257	C3
GABARAP	11337	5.17185e-19	43.485	0.998	0.932	C0		SLBP	7884	0	21.4542	0.945	0.636	C1		TMEM44	93109	1.47594e-09	-0.469309	0.214	0.295	C2		AXIN1	8312	2.29596e-50	-0.817134	0.062	0.285	C3
H2AFJ	55766	3.8912e-52	43.4761	0.99	0.916	C0		EIF3J	8669	6.37576e-258	21.2957	0.963	0.76	C1		PPP1R3D	5509	1.40143e-09	-0.469516	0.306	0.386	C2		PIGQ	9091	7.14159e-57	-0.81721	0.046	0.283	C3
RPS19BP1	91582	2.16076e-06	43.4566	0.996	0.906	C0		EIF4B	1975	2.85822e-152	21.2097	0.998	0.922	C1		TTC33	23548	0.00267192	-0.470913	0.263	0.301	C2		HDHD2	84064	8.53987e-45	-0.818739	0.08	0.292	C3
RPL10A	4736	5.02346e-46	43.3546	1	0.966	C0		TIPRL	261726	5.35721e-196	21.1983	0.939	0.75	C1		PILRB	29990	3.35475e-05	-0.471071	0.341	0.388	C2		PTEN	5728	1.35998e-49	-0.819908	0.055	0.273	C3
AHNAK	79026	4.25957e-103	43.2968	0.992	0.886	C0		EGLN1	54583	2.58386e-82	21.1861	0.67	0.446	C1		SLC2A11	66035	0.00541478	-0.472422	0.286	0.318	C2		THEM4	117145	1.62743e-51	-0.819953	0.067	0.295	C3
BCAP29	55973	0.000542154	42.3955	0.884	0.796	C0		NUDCD2	134492	1.51862e-297	21.1021	0.987	0.861	C1		PSEN2	5664	0.00425661	-0.4732	0.356	0.388	C2		PPCDC	60490	3.38948e-42	-0.820192	0.055	0.25	C3
FAM162A	26355	1.17982e-55	42.1026	0.983	0.891	C0		GNB2	2783	0	20.9616	0.999	0.936	C1		INPP5K	51763	0.000572565	-0.473393	0.271	0.317	C2		HACL1	26061	1.00125e-56	-0.820289	0.037	0.27	C3
ARID5B	84159	7.44583e-129	42.0268	0.929	0.75	C0		KMT2A	4297	6.44308e-190	20.9603	0.822	0.507	C1		ATG2A	23130	6.34185e-08	-0.473894	0.255	0.327	C2		MUTYH	4595	8.46487e-52	-0.820896	0.043	0.263	C3
UBE2B	7320	7.23996e-13	41.9257	0.979	0.869	C0		LSM8	51691	0	20.799	0.998	0.869	C1		TRIM34	53840	0.000276198	-0.474856	0.259	0.306	C2		SLC35E3	55508	5.72249e-53	-0.821058	0.047	0.273	C3
PDLIM1	9124	7.66627e-15	41.9195	0.825	0.811	C0		PEX3	8504	1.191e-46	20.733	0.557	0.376	C1		GLCE	26035	0.00209371	-0.475761	0.37	0.406	C2		ASH2L	9070	4.04338e-49	-0.821983	0.047	0.261	C3
ADAP1	11033	0.00204283	41.6875	0.365	0.328	C0		CDCA3	83461	0	20.5977	0.874	0.3	C1		JADE1	79960	0.00987696	-0.476191	0.222	0.252	C2		TTC28-AS1	284900	1.71134e-51	-0.822291	0.035	0.251	C3
MAFB	9935	7.1153e-77	41.2549	0.506	0.312	C0		LSM7	51690	0	20.531	0.998	0.903	C1		ZSWIM8	23053	3.96103e-05	-0.477059	0.266	0.317	C2		TPRN	286262	1.16764e-41	-0.822317	0.06	0.253	C3
PANK3	79646	1.35866e-48	40.8981	0.847	0.709	C0		NDUFB7	4713	4.27629e-284	20.3934	1	0.935	C1		B3GALT4	8705	5.76519e-08	-0.477193	0.211	0.279	C2		FAM160B2	64760	1.24013e-53	-0.822487	0.048	0.276	C3
SERPINB5	5268	3.40696e-29	40.8229	0.528	0.417	C0		PPP1R14B	26472	0	20.3792	1	0.969	C1		PNO1	56902	6.32528e-22	-0.477592	0.819	0.679	C2		TAF6L	10629	6.84871e-62	-0.822865	0.029	0.273	C3
AKR1C3	8644	1.46639e-08	40.6699	0.979	0.93	C0		MYL12B	103910	4.39193e-234	20.3787	1	0.958	C1		CBWD5	220869	0.00883419	-0.480415	0.397	0.424	C2		ZNF32	7580	8.32971e-49	-0.823805	0.062	0.28	C3
DEFB1	1672	4.14442e-48	40.6699	0.523	0.383	C0		BEX3	27018	2.86134e-29	20.3787	0.32	0.198	C1		TBL3	10607	0.000552701	-0.480462	0.399	0.435	C2		BX284668.5		3.60107e-46	-0.823813	0.058	0.265	C3
PDXK	8566	2.24227e-45	40.4524	0.959	0.84	C0		SRP9	6726	0	20.3752	1	0.946	C1		DHRS4-AS1	55449	5.76006e-07	-0.480592	0.234	0.297	C2		CLASRP	11129	1.33307e-55	-0.824363	0.059	0.296	C3
FRMD6	122786	1.06172e-12	39.6823	0.507	0.433	C0		YWHAH	7533	0	20.369	0.995	0.794	C1		STAM2	10254	0.0011766	-0.482147	0.33	0.366	C2		INTS14	81556	3.48059e-57	-0.824368	0.054	0.295	C3
CEACAM6	4680	1.79376e-15	39.6546	0.564	0.493	C0		GSPT1	2935	1.18845e-291	20.3661	0.993	0.872	C1		ZZEF1	23140	0.000179695	-0.483318	0.371	0.413	C2		ETAA1	54465	6.2261e-48	-0.824898	0.068	0.286	C3
ITPRID2	6744	3.10332e-42	39.2271	0.941	0.84	C0		KIF2C	11004	0	20.3418	0.787	0.204	C1		VAC14	55697	0.000215379	-0.484081	0.242	0.287	C2		SCAP	22937	8.82311e-54	-0.825054	0.059	0.29	C3
GNG5	2787	5.62225e-14	39.1947	0.998	0.942	C0		SF3B2	10992	0	20.3002	0.997	0.907	C1		SMC6	79677	1.18494e-08	-0.485283	0.466	0.368	C2		SLC35B3	51000	1.82812e-58	-0.825435	0.048	0.291	C3
NDUFS5	4725	0.00799811	39.172	1	0.957	C0		DDX46	9879	0	20.2433	0.997	0.853	C1		LTBP4	8425	0.00585178	-0.486074	0.267	0.299	C2		DOCK6	57572	1.03412e-53	-0.826043	0.052	0.283	C3
SDCBP	6386	5.41178e-47	39.1399	0.932	0.8	C0		FDX1	2230	8.4241e-192	20.2309	0.95	0.734	C1		SCNN1A	6337	0.00159418	-0.48637	0.314	0.353	C2		SH3PXD2A	9644	4.0877e-45	-0.826209	0.05	0.253	C3
SNU13	4809	1.621e-08	39.0835	0.997	0.947	C0		EIF3E	3646	2.83727e-237	20.2119	1	0.942	C1		LEO1	123169	0.00398416	-0.48669	0.469	0.423	C2		SGSM2	9905	1.17626e-46	-0.827694	0.058	0.267	C3
RBKS	64080	3.97004e-16	39.0111	0.375	0.288	C0		NDUFA1	4694	9.16088e-305	20.2053	1	0.961	C1		BYSL	705	3.59416e-07	-0.486952	0.55	0.465	C2		GIT2	9815	3.35374e-54	-0.828172	0.05	0.281	C3
STRAP	11171	1.78457e-08	38.7909	0.993	0.903	C0		ENAH	55740	6.49376e-173	20.1651	0.997	0.918	C1		ATP10D	57205	8.62439e-06	-0.487253	0.235	0.292	C2		BRWD3	254065	3.86898e-37	-0.829277	0.085	0.272	C3
CFL1	1072	1.40637e-05	38.7752	1	0.972	C0		ENC1	8507	6.97916e-93	20.1504	0.818	0.617	C1		WDR6	11180	3.07811e-06	-0.487357	0.249	0.311	C2		ING3	54556	2.1773e-52	-0.829392	0.061	0.29	C3
ETS2	2114	7.54161e-06	38.7411	0.343	0.299	C0		POLR2E	5434	4.34099e-298	19.9989	0.993	0.883	C1		LRRC75A	388341	0.00216955	-0.489254	0.507	0.477	C2		GNB5	10681	1.06979e-48	-0.829806	0.063	0.28	C3
RPL3	6122	4.24208e-43	37.7942	1	0.984	C0		CISD3	284106	6.14916e-227	19.951	0.987	0.846	C1		MAU2	23383	0.000171427	-0.495894	0.262	0.309	C2		RPARP-AS1	100505761	5.43394e-50	-0.829882	0.057	0.277	C3
CCND1	595	1.80288e-73	37.794	0.979	0.895	C0		ACYP1	97	0	19.8104	0.981	0.647	C1		PIGK	10026	0.000713097	-0.497417	0.616	0.552	C2		CHMP7	91782	5.55417e-52	-0.83036	0.077	0.309	C3
PRELID1	27166	3.10703e-14	37.7845	0.999	0.932	C0		ZPR1	8882	2.45728e-82	19.7324	0.627	0.401	C1		TANC1	85461	0.00180335	-0.497434	0.253	0.292	C2		FITM2	128486	8.92301e-52	-0.831216	0.055	0.28	C3
OST4	100128731	7.39917e-52	37.7844	0.999	0.938	C0		HEXIM1	10614	1.65699e-07	19.5192	0.807	0.743	C1		GPRC5D-AS1	100506314	0.000194573	-0.497659	0.28	0.326	C2		VTI1A	143187	8.46881e-57	-0.831305	0.057	0.299	C3
COX5B	1329	1.37061e-11	37.7743	1	0.964	C0		PIH1D1	55011	0	19.4715	0.996	0.845	C1		PPARA	5465	0.00191673	-0.500223	0.277	0.316	C2		TRPM4	54795	1.23299e-58	-0.831507	0.039	0.279	C3
IFI6	2537	7.69885e-26	37.7657	0.674	0.568	C0		NUSAP1	51203	0	19.4409	0.858	0.277	C1		ASXL2	55252	0.00990071	-0.50055	0.375	0.403	C2		PCGF1	84759	2.42098e-50	-0.831509	0.078	0.308	C3
MX1	4599	0.000309508	37.6376	0.273	0.24	C0		CDC20	991	0	19.2419	0.893	0.402	C1		CTDSP1	58190	0.000140857	-0.503033	0.381	0.43	C2		SMAP2	64744	5.74827e-49	-0.831805	0.076	0.299	C3
GOT1	2805	1.42656e-14	37.5884	0.622	0.633	C0		SOCS1	8651	7.09059e-09	19.2383	0.317	0.25	C1		MCM8	84515	1.05316e-08	-0.503287	0.408	0.311	C2		KLHL18	23276	1.85945e-51	-0.832212	0.057	0.281	C3
RHOC	389	0.00509352	37.3246	0.98	0.896	C0		MZT2A	653784	0	19.1764	0.997	0.856	C1		TBC1D17	79735	0.00143478	-0.50388	0.336	0.371	C2		RLF	6018	2.94891e-60	-0.832371	0.041	0.286	C3
TRIB3	57761	2.76612e-29	37.303	0.953	0.838	C0		ANP32E	81611	0	19.1649	0.968	0.647	C1		ABCD1	215	0.00778659	-0.505509	0.228	0.26	C2		RBM10	8241	8.11943e-53	-0.832588	0.072	0.305	C3
KYNU	8942	8.86544e-10	37.2384	0.899	0.811	C0		HSPB11	51668	0	19.1206	0.999	0.886	C1		AFF1	4299	2.39469e-06	-0.505878	0.242	0.303	C2		LINS1	55180	5.5755e-61	-0.832659	0.03	0.272	C3
CFD	1675	7.26047e-142	36.3418	0.959	0.832	C0		SRSF11	9295	0	19.1038	0.997	0.878	C1		AASDH	132949	9.34057e-09	-0.506288	0.264	0.341	C2		LIN7B	64130	4.69723e-53	-0.833268	0.036	0.257	C3
TRA2B	6434	3.58682e-69	36.3414	0.837	0.811	C0		GTSE1	51512	0	19.0178	0.74	0.182	C1		TRIM5	85363	0.00291923	-0.506384	0.218	0.254	C2		TCF12	6938	5.5795e-56	-0.833906	0.054	0.292	C3
CD163L1	283316	0.00739934	36.3402	0.916	0.819	C0		RNASET2	8635	4.61397e-126	18.9358	0.948	0.775	C1		POLR2D	5433	3.1711e-05	-0.506572	0.538	0.447	C2		LRFN4	78999	3.57531e-49	-0.833992	0.055	0.273	C3
MBOAT2	129642	8.41507e-66	36.34	0.76	0.62	C0		PSMA4	5685	0	18.9345	0.999	0.931	C1		PRR11	55771	1.55854e-48	-0.507006	0.379	0.187	C2		GPD1L	23171	4.19673e-43	-0.834193	0.065	0.266	C3
DERL1	79139	1.78894e-12	36.3298	0.971	0.856	C0		MORF4L2	9643	3.54586e-117	18.9243	0.998	0.919	C1		DCAF12	25853	0.0020868	-0.508085	0.37	0.402	C2		TELO2	9894	1.26211e-57	-0.835451	0.03	0.262	C3
TJP2	9414	2.95715e-05	36.3104	0.778	0.692	C0		HACD3	51495	0	18.8995	0.997	0.861	C1		CHSY1	22856	0.00437815	-0.509277	0.265	0.297	C2		ZFYVE19	84936	1.79556e-58	-0.835793	0.065	0.314	C3
RBCK1	10616	6.66684e-40	36.2732	0.995	0.902	C0		NDUFA11	126328	4.69433e-257	18.7685	0.999	0.928	C1		OGFOD2	79676	8.60559e-07	-0.509436	0.222	0.285	C2		ZDHHC21	340481	3.81065e-52	-0.836503	0.055	0.282	C3
SERTAD1	29950	3.33767e-09	36.2442	0.513	0.429	C0		AURKB	9212	0	18.7288	0.849	0.194	C1		SESN1	27244	2.39902e-09	-0.509637	0.211	0.289	C2		PNPLA1	285848	6.76246e-46	-0.837218	0.049	0.253	C3
ERRFI1	54206	4.55761e-19	36.2365	0.881	0.784	C0		ECT2	1894	0	18.6516	0.924	0.498	C1		MMD	23531	0.0041418	-0.510079	0.247	0.282	C2		BRAP	8315	4.49127e-58	-0.839095	0.055	0.3	C3
RAET1L	154064	4.92209e-20	36.1551	0.329	0.239	C0		DLGAP5	9787	6.04118e-255	18.647	0.713	0.282	C1		IRX5	10265	0.0012181	-0.510451	0.23	0.271	C2		REL	5966	4.50853e-51	-0.839099	0.082	0.316	C3
HIST1H2BJ	8970	1.35384e-47	36.1097	0.14	0.272	C0		MAGOHB	55110	0	18.5849	0.997	0.829	C1		LMTK2	22853	0.00616889	-0.511014	0.271	0.306	C2		CDK19	23097	2.19134e-47	-0.840181	0.069	0.285	C3
F3	2152	1.74125e-07	35.9939	0.455	0.41	C0		IFT43	112752	7.9073e-168	18.5409	0.989	0.865	C1		ARHGEF28	64283	6.27729e-06	-0.511117	0.283	0.34	C2		PPP2R1B	5519	1.44154e-47	-0.840467	0.051	0.262	C3
PARD6B	84612	3.45727e-21	35.8853	0.739	0.643	C0		LITAF	9516	2.35326e-208	18.4356	0.959	0.774	C1		MYO5A	4644	0.00213993	-0.515709	0.226	0.265	C2		MICAL2	9645	7.17384e-42	-0.840663	0.06	0.255	C3
CEBPG	1054	0.000117813	35.884	0.617	0.619	C0		KIF23	9493	0	18.4222	0.796	0.187	C1		LINC01234	100506465	3.26192e-05	-0.519193	0.3	0.357	C2		GALNT4	8693	1.3582e-52	-0.840952	0.043	0.265	C3
FILIP1L	11259	3.52741e-48	34.9257	0.466	0.312	C0		MPZL1	9019	1.53168e-104	18.4032	0.919	0.746	C1		NRSN2-AS1	100507459	4.19667e-06	-0.519308	0.289	0.348	C2		CLDN23	137075	6.97211e-55	-0.842376	0.039	0.268	C3
AKR1C2	1646	2.90468e-25	34.8991	0.94	0.875	C0		SSNA1	8636	0	18.3852	0.995	0.884	C1		CEP78	84131	2.29464e-06	-0.520962	0.372	0.295	C2		LRRC8E	80131	3.16727e-59	-0.843411	0.053	0.3	C3
IER3	8870	8.24141e-29	34.8991	0.966	0.888	C0		VANGL1	81839	0	18.3417	0.962	0.751	C1		PTCHD1	139411	3.00211e-05	-0.521667	0.216	0.268	C2		SPIDR	23514	8.63481e-50	-0.843699	0.065	0.287	C3
PPDPF	79144	6.86684e-39	34.8954	0.999	0.922	C0		IRF9	10379	2.44422e-82	18.2688	0.805	0.628	C1		RNF170	81790	1.08346e-09	-0.521835	0.222	0.301	C2		GNPTAB	79158	1.30643e-49	-0.843897	0.06	0.28	C3
RAB13	5872	1.66085e-25	34.8848	0.976	0.857	C0		ZNF207	7756	2.66202e-232	18.2308	0.979	0.812	C1		DONSON	29980	0.00840821	-0.522853	0.254	0.214	C2		CTDP1	9150	6.68527e-50	-0.845635	0.07	0.293	C3
FAM3A	60343	4.63473e-05	34.7378	0.757	0.661	C0		CBX1	10951	3.91333e-274	18.2298	0.88	0.542	C1		TSPAN10	83882	1.4597e-08	-0.522927	0.206	0.277	C2		ACTR5	79913	1.21476e-58	-0.845833	0.051	0.295	C3
PFDN2	5202	7.41807e-18	34.7159	0.993	0.907	C0		EMG1	10436	0	18.213	0.993	0.825	C1		MFSD5	84975	0.00183862	-0.523574	0.286	0.322	C2		AC092821.3		1.48929e-52	-0.845903	0.041	0.262	C3
RPL36	25873	4.65217e-06	34.7063	0.999	0.974	C0		RPP21	79897	0	18.1505	0.988	0.834	C1		HEIH	100859930	0.00127603	-0.524085	0.25	0.289	C2		PLOD1	5351	2.35212e-49	-0.847015	0.062	0.283	C3
GHITM	27069	0.00127926	34.5621	0.996	0.914	C0		STMN1	3925	0	18.1304	0.996	0.678	C1		RBM15B	29890	0.007258	-0.526751	0.43	0.462	C2		TBC1D30	23329	2.22799e-50	-0.847134	0.058	0.278	C3
UGCG	7357	2.30317e-26	34.4412	0.726	0.623	C0		NFIA	4774	9.92568e-187	17.9959	0.939	0.74	C1		CD3EAP	10849	2.33633e-08	-0.527157	0.392	0.308	C2		THAP6	152815	8.26938e-57	-0.84748	0.048	0.286	C3
RAB10	10890	1.00686e-34	34.3698	0.977	0.865	C0		KATNA1	11104	4.49485e-145	17.9867	0.666	0.37	C1		BTNL9	153579	0.00143907	-0.527977	0.212	0.252	C2		PRMT6	55170	5.33422e-56	-0.848451	0.049	0.285	C3
AARS	16	0.00829137	34.2832	0.463	0.472	C0		NCAPD2	9918	0	17.9725	0.855	0.357	C1		SAAL1	113174	6.25814e-28	-0.528539	0.722	0.531	C2		C2CD2	25966	1.19947e-49	-0.849538	0.062	0.283	C3
PRSS22	64063	2.23232e-51	33.6397	0.554	0.395	C0		ARL6IP4	51329	1.26598e-291	17.8994	0.998	0.901	C1		TRMU	55687	5.65602e-06	-0.528848	0.514	0.432	C2		MFSD4A	148808	1.59615e-44	-0.850616	0.061	0.264	C3
TAF9	6880	0.00915989	33.6242	0.898	0.804	C0		TK1	7083	0	17.8599	0.99	0.516	C1		SHFL	55337	2.79698e-06	-0.531269	0.25	0.311	C2		RGP1	9827	8.06166e-54	-0.850665	0.053	0.284	C3
NABP1	64859	3.00352e-64	33.5371	0.624	0.456	C0		TUBG1	7283	0	17.837	0.993	0.788	C1		INSR	3643	2.37265e-07	-0.532769	0.232	0.301	C2		FEM1A	55527	7.69592e-48	-0.850989	0.059	0.272	C3
IRX3	79191	8.68812e-123	33.5187	0.925	0.787	C0		SEC63	11231	2.71839e-181	17.8247	0.919	0.692	C1		AC009403.1		0.00123919	-0.53585	0.299	0.341	C2		IFNAR2	3455	8.89231e-54	-0.851146	0.058	0.289	C3
RAB5IF	55969	4.19145e-08	33.4564	0.998	0.937	C0		UAP1	6675	7.37146e-65	17.8104	0.526	0.32	C1		CARMIL1	55604	1.42028e-07	-0.536212	0.514	0.569	C2		TACC2	10579	4.26389e-45	-0.851259	0.074	0.284	C3
FBXO32	114907	3.55794e-11	33.4557	0.261	0.197	C0		HMMR	3161	0	17.8011	0.815	0.313	C1		RIOK1	83732	6.80335e-05	-0.536228	0.585	0.511	C2		ICK	22858	7.66057e-48	-0.851298	0.071	0.29	C3
MFSD2A	84879	8.31376e-42	33.4557	0.685	0.553	C0		MTHFD2	10797	0	17.7257	0.981	0.636	C1		AKAP8L	26993	5.8592e-06	-0.536328	0.494	0.431	C2		DHX8	1659	3.15872e-53	-0.851986	0.075	0.312	C3
VGF	7425	0.000665145	33.4218	0.409	0.43	C0		PKIB	5570	1.82788e-245	17.6741	0.977	0.823	C1		PIP4P1	90809	2.30487e-05	-0.536367	0.406	0.457	C2		PAFAH2	5051	1.10748e-43	-0.853854	0.058	0.258	C3
TMEM70	54968	2.10665e-08	33.4153	0.605	0.614	C0		GPX4	2879	0	17.4933	1	0.967	C1		PLXND1	23129	0.000680892	-0.537501	0.326	0.365	C2		RP2	6102	1.40404e-46	-0.854789	0.055	0.265	C3
SP6	80320	9.00778e-84	33.4072	0.776	0.58	C0		SNW1	22938	0	17.4933	0.996	0.853	C1		NUP107	57122	1.26354e-22	-0.539007	0.638	0.474	C2		SIRT5	23408	3.02456e-60	-0.854832	0.046	0.294	C3
SNAPC1	6617	2.31243e-17	33.3822	0.332	0.412	C0		UBE2E3	10477	0	17.4928	1	0.898	C1		CHEK1	1111	2.77883e-14	-0.540103	0.336	0.222	C2		ATXN3	4287	3.26807e-59	-0.855191	0.051	0.298	C3
FAM83A	84985	2.43256e-22	33.3069	0.707	0.608	C0		RFC4	5984	0	17.4876	0.917	0.402	C1		GTF2H2	2966	0.0004023	-0.540509	0.47	0.409	C2		CDC14B	8555	8.7304e-44	-0.85541	0.059	0.259	C3
NAP1L1	4673	5.09708e-76	33.2689	0.974	0.906	C0		IMPA2	3613	0	17.4798	0.908	0.563	C1		APH1B	83464	0.00196659	-0.541546	0.247	0.286	C2		NDUFAF7	55471	2.05472e-60	-0.856076	0.049	0.298	C3
MREG	55686	9.59778e-64	32.6212	0.786	0.658	C0		MRPS21	54460	1.42365e-295	17.4674	1	0.923	C1		NT5DC3	51559	0.000245623	-0.541675	0.262	0.307	C2		MYO1F	4542	5.17901e-51	-0.856858	0.051	0.272	C3
LRRC8A	56262	3.49246e-08	32.5433	0.511	0.451	C0		CMBL	134147	4.79717e-185	16.9714	0.976	0.776	C1		CELSR1	9620	0.000111587	-0.542873	0.251	0.298	C2		PCED1A	64773	6.02619e-60	-0.857196	0.039	0.282	C3
UBA52	7311	4.9651e-13	32.0301	1	0.965	C0		CLTA	1211	0	16.8736	1	0.934	C1		WDR46	9277	0.00164147	-0.543139	0.703	0.63	C2		DDX28	55794	1.18735e-63	-0.857404	0.05	0.308	C3
ITM2B	9445	3.35443e-70	32.0137	0.995	0.907	C0		SNRNP25	79622	0	16.8257	0.993	0.809	C1		SH3BP5	9467	0.00462893	-0.544064	0.274	0.308	C2		ZBTB7B	51043	1.39494e-56	-0.857598	0.051	0.29	C3
PDCD6	10016	8.23587e-23	32.0124	0.999	0.937	C0		WDR34	89891	0	16.7936	0.994	0.803	C1		TAF6	6878	0.000126838	-0.548397	0.61	0.539	C2		KCNC4	3749	8.41185e-45	-0.857774	0.057	0.26	C3
MLF2	8079	6.71387e-30	31.9419	0.996	0.926	C0		ATP6V1D	51382	3.44443e-298	16.7765	0.989	0.84	C1		SRPRA	6734	0.00245821	-0.549195	0.34	0.379	C2		TPP1	1200	5.59279e-59	-0.857869	0.054	0.301	C3
HLA-C	3107	3.29452e-28	31.874	0.953	0.835	C0		PSMG4	389362	4.8696e-237	16.7612	0.957	0.753	C1		ARFIP2	23647	0.000752457	-0.550005	0.442	0.48	C2		DEDD	9191	1.1731e-58	-0.858223	0.06	0.307	C3
NIBAN2	64855	9.35301e-44	31.6068	0.713	0.582	C0		GON7	84520	4.88178e-162	16.6796	0.64	0.314	C1		NAA15	80155	3.568e-05	-0.550055	0.734	0.655	C2		AC073332.1		1.60983e-54	-0.8583	0.057	0.289	C3
NHP2	55651	3.8453e-05	31.4207	0.991	0.913	C0		TROAP	10024	9.47264e-275	16.6601	0.826	0.414	C1		ZFP62	643836	0.00119732	-0.550665	0.311	0.35	C2		MED14	9282	1.03388e-52	-0.85831	0.053	0.28	C3
ABL2	27	0.00207319	31.4075	0.341	0.307	C0		PPIG	9360	0	16.5625	0.991	0.832	C1		KCTD10	83892	0.00435162	-0.550747	0.309	0.344	C2		CAD	790	8.90203e-49	-0.859332	0.045	0.257	C3
INTS6	26512	0.00472008	31.2752	0.55	0.499	C0		CCNB2	9133	2.38947e-271	16.4952	0.818	0.367	C1		STAT5B	6777	2.6116e-06	-0.551106	0.195	0.254	C2		SBF2	81846	2.53603e-61	-0.860375	0.046	0.296	C3
HLA-A	3105	3.59173e-10	31.0549	0.741	0.652	C0		LSM6	11157	0	16.4815	0.994	0.833	C1		TMEM209	84928	7.80132e-08	-0.551749	0.555	0.462	C2		CHFR	55743	1.94351e-57	-0.860711	0.049	0.288	C3
TRIP4	9325	0.00127324	30.8175	0.263	0.23	C0		SLC2A4RG	56731	0	16.3903	0.999	0.89	C1		PPHLN1	51535	0.00197337	-0.552101	0.67	0.604	C2		PPP2R2C	5522	7.72594e-51	-0.861639	0.066	0.291	C3
AL161431.1		3.10457e-06	30.571	0.323	0.374	C0		PDCD5	9141	0	16.382	1	0.912	C1		FBXL17	64839	5.34851e-10	-0.552198	0.218	0.3	C2		DOCK7	85440	2.79462e-53	-0.862252	0.066	0.3	C3
EDF1	8721	9.56304e-32	30.571	0.999	0.926	C0		CASP4	837	1.16797e-86	16.3732	0.87	0.693	C1		PRRC2A	7916	0.00626951	-0.55353	0.506	0.447	C2		ROGDI	79641	4.15534e-65	-0.862776	0.039	0.298	C3
DUSP5	1847	1.82562e-13	30.5709	0.661	0.578	C0		MRPS33	51650	8.20939e-242	16.2946	0.994	0.89	C1		PPP1R37	284352	0.00828828	-0.553666	0.3	0.333	C2		SRBD1	55133	5.84931e-53	-0.863027	0.045	0.27	C3
ATP6V0E1	8992	6.78975e-15	30.5565	0.999	0.937	C0		EIF4G2	1982	6.94484e-263	16.231	0.997	0.919	C1		ZMIZ2	83637	0.00305434	-0.555632	0.337	0.376	C2		ATAD1	84896	1.78769e-62	-0.863823	0.043	0.295	C3
SETX	23064	5.91382e-08	30.5323	0.546	0.468	C0		STX5	6811	1.53938e-132	16.2173	0.906	0.725	C1		FSTL4	23105	4.00821e-12	-0.555945	0.285	0.38	C2		SORL1	6653	2.25801e-47	-0.866042	0.057	0.268	C3
SLC25A6	293	1.47274e-40	30.5165	0.994	0.929	C0		TMEM181	57583	5.29097e-80	16.1945	0.696	0.473	C1		DVL1	1855	0.00173283	-0.556283	0.338	0.374	C2		PEX11B	8799	6.25121e-46	-0.866139	0.065	0.275	C3
KLF5	688	6.08541e-13	30.4741	0.752	0.652	C0		FBXO30	84085	7.83053e-35	16.1162	0.27	0.146	C1		KCNMB2-AS1	104797538	0.00153429	-0.558792	0.33	0.373	C2		FAM160B1	57700	1.7379e-53	-0.86674	0.06	0.292	C3
PCID2	55795	2.40435e-09	30.2231	0.599	0.613	C0		MRPL33	9553	2.69918e-257	16.0936	0.996	0.905	C1		AP5S1	55317	0.000241334	-0.558836	0.262	0.306	C2		SPECC1L	23384	3.17385e-51	-0.867401	0.065	0.292	C3
MVD	4597	5.31345e-73	30.1226	0.912	0.772	C0		TOMM7	54543	4.47631e-303	16.0506	1	0.964	C1		AP2A2	161	0.000937128	-0.559123	0.379	0.417	C2		CLUAP1	23059	1.21263e-48	-0.868488	0.057	0.272	C3
SRP14	6727	2.32979e-06	30.1093	0.997	0.946	C0		NAA38	84316	1.96223e-284	16.0506	1	0.925	C1		GALT	2592	2.31834e-05	-0.560207	0.23	0.284	C2		ARHGEF16	27237	3.98991e-63	-0.868934	0.039	0.292	C3
CAB39	51719	2.91545e-31	29.9884	0.826	0.723	C0		TPM3	7170	0	16.0502	1	0.928	C1		FGD6	55785	1.34028e-06	-0.561224	0.314	0.377	C2		MON1B	22879	1.00603e-53	-0.869132	0.046	0.274	C3
LTA4H	4048	1.35212e-21	29.2487	0.765	0.65	C0		RPL27A	6157	3.1576e-225	16.0493	1	0.976	C1		VPS13A	23230	2.60577e-05	-0.561704	0.368	0.419	C2		PGGT1B	5229	4.09153e-56	-0.869135	0.078	0.323	C3
SRSF9	8683	2.50422e-12	29.1296	0.998	0.935	C0		HES4	57801	0	16.0469	0.903	0.501	C1		ANKRD11	29123	0.000186392	-0.562019	0.674	0.608	C2		VPS45	11311	1.58696e-65	-0.869512	0.045	0.308	C3
COX19	90639	0.00262459	29.1283	0.742	0.692	C0		STIP1	10963	0	16.0462	0.997	0.887	C1		MAN2B1	4125	0.000415727	-0.562911	0.334	0.374	C2		RAI1	10743	1.53245e-58	-0.869771	0.065	0.313	C3
MALL	7851	3.53344e-51	29.1283	0.857	0.756	C0		SEPTIN7	989	0	16.0306	0.999	0.91	C1		MIER2	54531	0.000669425	-0.564574	0.235	0.278	C2		ERCC6L2	375748	9.46094e-60	-0.869853	0.053	0.302	C3
UBL5	59286	9.69866e-23	29.1278	0.999	0.944	C0		C19orf53	28974	1.5199e-262	16.0245	0.999	0.94	C1		ZBED5	58486	2.509e-06	-0.566255	0.228	0.288	C2		MPP3	4356	8.19004e-56	-0.870437	0.047	0.281	C3
RPL21	6144	0.000468494	29.1191	0.999	0.965	C0		EIF3L	51386	1.07085e-259	16.0154	0.999	0.914	C1		ECHDC2	55268	2.92274e-06	-0.566293	0.254	0.313	C2		SPATA2	9825	2.83396e-54	-0.870809	0.057	0.289	C3
PDGFB	5155	7.00575e-55	29.0549	0.62	0.452	C0		BLOC1S1	2647	0	15.9128	0.999	0.904	C1		GOLPH3L	55204	0.0027308	-0.567303	0.368	0.405	C2		FBXL20	84961	2.86132e-49	-0.871392	0.059	0.276	C3
CALR	811	2.32838e-19	29.0485	0.992	0.911	C0		PRRT4	401399	6.9096e-16	15.9084	0.322	0.23	C1		AMACR	23600	6.78e-06	-0.569516	0.316	0.373	C2		PLAGL2	5326	2.92737e-57	-0.872674	0.059	0.301	C3
TIMP2	7077	3.67226e-54	29.0374	0.907	0.771	C0		BRI3BP	140707	0	15.902	0.951	0.574	C1		RNF145	153830	1.48162e-06	-0.570529	0.454	0.374	C2		PCBP4	57060	9.55367e-52	-0.873883	0.045	0.266	C3
UBXN1	51035	3.60469e-49	28.9222	0.997	0.886	C0		NUF2	83540	0	15.8336	0.76	0.193	C1		CENPV	201161	0.00357791	-0.571067	0.399	0.346	C2		ZNF76	7629	3.13207e-57	-0.875192	0.074	0.322	C3
CTSD	1509	4.758e-102	28.6227	0.999	0.914	C0		CRNDE	643911	0	15.8301	0.994	0.855	C1		GTF3C5	9328	0.000995015	-0.572772	0.467	0.398	C2		ANXA8L1	728113	1.0287e-50	-0.875774	0.042	0.258	C3
ARPC1A	10552	9.49345e-06	28.544	0.996	0.926	C0		DLD	1738	8.03464e-198	15.7949	0.967	0.785	C1		TRIM13	10206	1.65972e-05	-0.574431	0.306	0.359	C2		GCDH	2639	1.22317e-67	-0.876303	0.047	0.316	C3
VAMP8	8673	3.62452e-35	28.5114	0.993	0.904	C0		SCPEP1	59342	2.48967e-73	15.7336	0.867	0.672	C1		SIRT2	22933	3.95886e-06	-0.574547	0.366	0.43	C2		BTRC	8945	1.33142e-51	-0.877585	0.068	0.297	C3
DDIT4	54541	8.05734e-148	28.0947	0.703	0.437	C0		UQCC3	790955	0	15.6619	0.997	0.857	C1		ABCC1	4363	0.000158148	-0.574863	0.219	0.266	C2		MAGI1	9223	3.46771e-44	-0.877889	0.062	0.265	C3
PLPP2	8612	4.81857e-05	27.7694	0.99	0.889	C0		NEK2	4751	0	15.6422	0.673	0.212	C1		ANKRD46	157567	0.000214461	-0.575872	0.357	0.399	C2		AC012640.2		3.28359e-51	-0.878465	0.037	0.253	C3
DYNLRB1	83658	5.16113e-05	27.7281	0.995	0.902	C0		COMMD5	28991	3.71209e-131	15.6361	0.912	0.719	C1		PXYLP1	92370	0.000117878	-0.576558	0.206	0.251	C2		MEX3D	399664	3.79515e-52	-0.878873	0.083	0.318	C3
SAR1B	51128	5.98405e-06	27.6965	0.949	0.83	C0		HNRNPR	10236	0	15.6271	0.998	0.873	C1		CCDC137	339230	1.2565e-12	-0.577051	0.706	0.584	C2		INO80	54617	5.18434e-55	-0.879123	0.07	0.31	C3
CD164	8763	1.01702e-65	27.6856	0.992	0.9	C0		CENPN	55839	0	15.6028	0.966	0.545	C1		SEMA4D	10507	0.00530745	-0.58102	0.222	0.255	C2		RALGPS1	9649	2.449e-56	-0.87934	0.057	0.294	C3
AKR1A1	10327	9.599e-52	27.6814	0.892	0.746	C0		EZH2	2146	0	15.575	0.959	0.409	C1		CCDC93	54520	0.000869876	-0.582044	0.31	0.353	C2		ITFG2	55846	5.25586e-62	-0.879988	0.034	0.28	C3
FXYD5	53827	8.21644e-18	27.6804	0.986	0.898	C0		PDCD2	5134	1.37196e-131	15.5731	0.968	0.822	C1		MFAP3L	9848	1.5603e-11	-0.582313	0.166	0.253	C2		TRIM37	4591	3.73103e-49	-0.880836	0.076	0.302	C3
QSOX1	5768	1.17406e-22	27.6687	0.72	0.614	C0		HIST1H1D	3007	0	15.5634	0.501	0.052	C1		LINC01003	100128822	0.00595817	-0.582398	0.528	0.473	C2		STK32C	282974	1.69414e-57	-0.881585	0.052	0.294	C3
SNHG8	100093630	2.44603e-51	27.6655	0.909	0.759	C0		GNG10	2790	3.69088e-120	15.5446	0.996	0.904	C1		MROH1	727957	0.000102962	-0.585904	0.45	0.495	C2		PAK6	56924	2.77854e-46	-0.881843	0.061	0.271	C3
ANXA3	306	1.39167e-05	27.6441	0.633	0.653	C0		EEF1A2	1917	5.25509e-105	15.4819	0.915	0.755	C1		ABHD13	84945	0.00859006	-0.587929	0.346	0.376	C2		LANCL1	10314	8.28799e-57	-0.882183	0.05	0.288	C3
MECP2	4204	1.34933e-06	27.5982	0.75	0.663	C0		CLSPN	63967	0	15.3788	0.812	0.176	C1		ADORA2B	136	0.00259447	-0.58856	0.392	0.339	C2		ANGEL2	90806	1.93964e-60	-0.882222	0.078	0.338	C3
TRAPPC2L	51693	6.03817e-15	27.5887	0.994	0.903	C0		COLGALT1	79709	6.25359e-146	15.3559	0.853	0.606	C1		MAMLD1	10046	1.00221e-16	-0.589524	0.144	0.25	C2		CLMN	79789	8.06628e-53	-0.882352	0.043	0.267	C3
SLC35F5	80255	2.12082e-27	27.4412	0.632	0.516	C0		UQCC2	84300	0	15.3101	0.999	0.886	C1		PNN	5411	1.20007e-41	-0.590378	0.887	0.733	C2		CNOT6L	246175	1.24641e-49	-0.882767	0.074	0.299	C3
METTL9	51108	1.14566e-09	27.4143	0.977	0.872	C0		DCUN1D5	84259	7.54697e-221	15.3037	0.972	0.801	C1		FUBP1	8880	1.29859e-08	-0.591496	0.804	0.708	C2		CBX2	84733	3.41115e-46	-0.88323	0.084	0.302	C3
SULT2B1	6820	1.65291e-84	27.3571	0.825	0.65	C0		KIF14	9928	1.02288e-306	15.2127	0.527	0.123	C1		C6orf120	387263	1.03253e-05	-0.593569	0.315	0.376	C2		FAM172A	83989	6.36317e-53	-0.88411	0.069	0.304	C3
MAFG	4097	2.45438e-07	27.3475	0.735	0.71	C0		AKT1S1	84335	4.71799e-108	15.2013	0.865	0.652	C1		SH3TC2	79628	0.00228827	-0.594596	0.236	0.272	C2		DHDDS	79947	2.20631e-57	-0.884363	0.049	0.29	C3
KLK8	11202	8.99059e-174	27.2428	0.986	0.887	C0		TIMM8A	1678	2.90423e-302	15.137	0.913	0.603	C1		C18orf21	83608	0.00222515	-0.595915	0.334	0.371	C2		PPWD1	23398	2.08549e-65	-0.885377	0.051	0.315	C3
DMKN	93099	3.16014e-38	27.2337	0.894	0.785	C0		TEAD1	7003	9.55634e-153	15.0799	0.878	0.653	C1		PRKCH	5583	2.89049e-06	-0.596572	0.209	0.266	C2		TET3	200424	1.08902e-45	-0.885766	0.065	0.274	C3
TRIB1	10221	1.51718e-56	27.2302	0.739	0.581	C0		CDC25B	994	0	15.0335	0.862	0.394	C1		WWC2	80014	2.86266e-05	-0.597215	0.259	0.315	C2		ARHGEF2	9181	4.49097e-55	-0.88582	0.038	0.266	C3
CTSA	5476	1.17563e-89	27.1743	0.968	0.831	C0		HACD1	9200	1.72915e-305	15.0329	0.982	0.795	C1		DUXAP8	503637	0.000620534	-0.598281	0.458	0.399	C2		DCAF4	26094	1.29635e-58	-0.886139	0.049	0.293	C3
MRFAP1	93621	0.00909354	27.1182	0.959	0.855	C0		E2F1	1869	0	14.9539	0.851	0.298	C1		C17orf75	64149	0.00135298	-0.600238	0.623	0.553	C2		PPIL2	23759	9.43005e-64	-0.886191	0.049	0.308	C3
SNHG17	388796	1.29965e-08	26.9243	0.459	0.5	C0		COX17	10063	0	14.9099	1	0.93	C1		XPR1	9213	2.50196e-06	-0.601684	0.312	0.366	C2		SETD6	79918	5.33083e-56	-0.886224	0.065	0.305	C3
ATP2B1	490	4.73286e-15	26.9181	0.871	0.779	C0		RNPS1	10921	0	14.8971	0.992	0.819	C1		KIF13B	23303	0.00874857	-0.601878	0.338	0.366	C2		ZNF3	7551	2.83689e-51	-0.887093	0.042	0.26	C3
SOX9	6662	1.70432e-49	26.6949	0.852	0.707	C0		HNRNPH2	3188	3.16545e-79	14.8808	0.914	0.759	C1		PRKCA	5578	0.000453396	-0.603563	0.269	0.311	C2		CTTNBP2NL	55917	8.04642e-58	-0.887347	0.063	0.309	C3
ZBED5-AS1	729013	4.1796e-18	26.6935	0.601	0.494	C0		DNAJC9	23234	0	14.762	0.942	0.45	C1		CCNO	10309	1.85525e-06	-0.603744	0.334	0.396	C2		METTL1	4234	2.87021e-67	-0.88737	0.05	0.32	C3
MXD1	4084	1.04919e-29	26.4811	0.481	0.354	C0		TRIR	79002	0	14.6959	0.999	0.92	C1		SINHCAF	58516	0.00792534	-0.603986	0.667	0.599	C2		SCMH1	22955	9.12248e-62	-0.887488	0.046	0.299	C3
SBDS	51119	6.77083e-10	26.3149	0.966	0.864	C0		MICOS10	440574	0	14.6784	1	0.95	C1		PARVA	55742	0.000212925	-0.604182	0.314	0.357	C2		ELAC1	55520	8.76855e-58	-0.887619	0.049	0.289	C3
CDA	978	2.22981e-67	26.3111	0.617	0.451	C0		TMED3	23423	3.91782e-161	14.6405	0.999	0.919	C1		PPIP5K2	23262	0.000268452	-0.605337	0.368	0.413	C2		AC009005.1		2.52345e-53	-0.887923	0.04	0.265	C3
EEF2	1938	1.39149e-35	26.2429	0.995	0.922	C0		KRTCAP2	200185	9.21077e-195	14.6079	0.999	0.939	C1		ENG	2022	0.000408761	-0.606169	0.266	0.312	C2		ZNF746	155061	5.25839e-52	-0.890199	0.067	0.295	C3
GRN	2896	2.92189e-136	26.2426	0.98	0.842	C0		TBCA	6902	0	14.6079	1	0.946	C1		TMX3	54495	0.00026668	-0.608817	0.342	0.387	C2		ARHGAP10	79658	2.23301e-38	-0.890317	0.097	0.291	C3
RPL22	6146	2.16338e-08	26.2413	0.999	0.971	C0		TBPL1	9519	1.9212e-162	14.6079	0.751	0.464	C1		FRS2	10818	0.000482405	-0.608928	0.282	0.326	C2		HLA-DMA	3108	7.86136e-53	-0.890324	0.047	0.273	C3
CYP4B1	1580	3.01348e-74	26.2374	0.446	0.256	C0		DPY30	84661	0	14.6078	1	0.932	C1		CALCOCO1	57658	1.21652e-12	-0.608947	0.163	0.253	C2		FTSJ1	24140	1.58904e-57	-0.890635	0.054	0.296	C3
HIST1H2BC	3017	1.48389e-30	26.2132	0.316	0.205	C0		RTN3	10313	3.03498e-279	14.6073	0.998	0.92	C1		SPATA13	221178	1.32113e-05	-0.609289	0.329	0.383	C2		MOV10	4343	1.52123e-61	-0.890986	0.046	0.297	C3
SH3KBP1	30011	2.23888e-08	26.0572	0.719	0.644	C0		BAD	572	0	14.5991	0.991	0.82	C1		SMPDL3A	10924	2.68399e-07	-0.60988	0.253	0.319	C2		ZBED4	9889	3.24737e-53	-0.891056	0.1	0.343	C3
ATG101	60673	0.00103203	25.9262	0.871	0.755	C0		KPNB1	3837	0	14.5923	0.998	0.866	C1		ARAP1	116985	0.00142173	-0.611346	0.319	0.355	C2		KAT2A	2648	6.06848e-53	-0.891403	0.05	0.276	C3
NUP58	9818	1.62525e-06	25.9227	0.606	0.618	C0		SRRM2	23524	8.52926e-278	14.5707	0.996	0.902	C1		KDF1	126695	0.00168195	-0.612164	0.282	0.322	C2		HGSNAT	138050	6.52536e-54	-0.89144	0.063	0.296	C3
HIF1A	3091	1.0015e-06	25.8382	0.853	0.763	C0		LBR	3930	0	14.3962	0.965	0.71	C1		UBL4A	8266	0.00024255	-0.6135	0.892	0.781	C2		EIF4ENIF1	56478	1.82384e-52	-0.89213	0.072	0.306	C3
CALB2	794	5.79957e-44	25.788	0.932	0.829	C0		SLC35B2	347734	2.87044e-254	14.392	0.963	0.74	C1		VPS52	6293	0.00592827	-0.614351	0.348	0.379	C2		RSPH3	83861	1.41212e-45	-0.892164	0.069	0.278	C3
CYTOR	112597	8.99082e-60	25.7812	0.752	0.775	C0		TNNT1	7138	6.48161e-208	14.3627	1	0.924	C1		GDI2	2665	4.57689e-05	-0.61437	0.969	0.878	C2		SENP1	29843	4.81885e-51	-0.893167	0.071	0.297	C3
CYHR1	50626	4.6137e-38	25.6414	0.808	0.655	C0		MTDH	92140	0	14.2451	0.999	0.913	C1		PLS1	5357	2.28839e-10	-0.615382	0.52	0.413	C2		LIMK2	3985	2.5644e-52	-0.893198	0.045	0.269	C3
BOLA2	552900	3.82785e-13	25.2308	0.936	0.855	C0		NASP	4678	0	14.2423	0.987	0.68	C1		CTSF	8722	0.000945456	-0.617334	0.27	0.314	C2		WDR83	84292	2.24153e-71	-0.893446	0.031	0.304	C3
SLC12A7	10723	0.000186354	25.2041	0.365	0.398	C0		TIMM17A	10440	5.23878e-225	14.2184	0.987	0.849	C1		FUCA1	2517	0.000107246	-0.617654	0.424	0.468	C2		ELL	8178	7.65026e-54	-0.893527	0.057	0.287	C3
MTRNR2L1	100462977	3.50251e-27	25.0655	0.677	0.551	C0		TMPO	7112	0	14.1758	0.966	0.465	C1		SYTL1	84958	1.04916e-08	-0.62391	0.225	0.297	C2		SIPA1L3	23094	2.87538e-44	-0.893991	0.083	0.294	C3
VBP1	7411	1.11677e-49	24.9445	0.929	0.852	C0		ZBTB44	29068	5.80502e-73	14.1751	0.486	0.27	C1		RHBDF1	64285	6.25963e-09	-0.627302	0.282	0.357	C2		CNP	1267	6.28916e-52	-0.894707	0.09	0.327	C3
ANXA5	308	6.35066e-105	24.8806	0.86	0.838	C0		MRPL34	64981	0	14.1662	0.997	0.874	C1		RANGAP1	5905	1.06874e-11	-0.627585	0.645	0.534	C2		SEC24B	10427	2.03132e-62	-0.894781	0.054	0.31	C3
ATP6V1G1	9550	2.1618e-110	24.8099	0.998	0.947	C0		SRSF10	10772	0	14.1427	0.987	0.772	C1		ATG10	83734	0.00164056	-0.627741	0.326	0.371	C2		JAZF1	221895	2.08493e-55	-0.895323	0.041	0.271	C3
TOMM20	9804	1.0021e-10	24.8003	0.999	0.947	C0		SUPT4H1	6827	4.09245e-139	14.1138	0.979	0.853	C1		C1orf52	148423	0.00522052	-0.627851	0.652	0.587	C2		AC004540.2		3.03276e-44	-0.895344	0.058	0.26	C3
LINC01278	92249	1.05966e-36	24.8002	0.886	0.75	C0		AL356234.2		4.9981e-95	14.1101	0.433	0.206	C1		AC016747.1		1.03507e-05	-0.629285	0.527	0.554	C2		KMT2D	8085	1.20422e-59	-0.895484	0.07	0.323	C3
FADS1	3992	9.32477e-44	24.8002	0.718	0.767	C0		MARK3	4140	5.30463e-105	14.087	0.878	0.682	C1		INPPL1	3636	0.000568931	-0.629856	0.302	0.342	C2		TRMT12	55039	9.86556e-67	-0.895923	0.049	0.317	C3
HACD2	201562	1.07042e-09	24.8	0.847	0.756	C0		TRIOBP	11078	6.72572e-229	14.0497	0.931	0.677	C1		GMEB2	26205	1.62065e-05	-0.630643	0.297	0.349	C2		ACKR2	1238	7.21158e-57	-0.896457	0.043	0.279	C3
C1QBP	708	1.19229e-16	24.79	0.995	0.927	C0		PSMC3	5702	0	14.0489	0.998	0.881	C1		KLHL2	11275	1.08233e-08	-0.630792	0.3	0.376	C2		WRAP73	49856	1.09367e-60	-0.896562	0.069	0.324	C3
MRPL22	29093	5.28302e-14	24.7892	0.947	0.838	C0		PNKD	25953	0	14.0314	0.999	0.909	C1		SPSB2	84727	0.00132499	-0.632675	0.383	0.422	C2		IFT80	57560	2.20424e-50	-0.896782	0.043	0.258	C3
GSN	2934	2.40471e-120	24.7878	0.933	0.792	C0		PSMB2	5690	0	14.0134	1	0.947	C1		CYP2J2	1573	1.23331e-05	-0.632949	0.204	0.259	C2		RAB20	55647	2.50804e-41	-0.897047	0.085	0.287	C3
COX7A2	1347	2.26369e-12	24.7739	0.999	0.945	C0		FAM111A	63901	0	14.0029	0.929	0.356	C1		ADGRA3	166647	4.42102e-06	-0.633453	0.217	0.274	C2		ACP6	51205	3.76501e-58	-0.89708	0.052	0.296	C3
EFNB2	1948	4.04799e-11	24.6973	0.283	0.354	C0		MAP2K2	5605	1.69849e-172	14.0027	0.993	0.866	C1		SUPT7L	9913	0.00497452	-0.635218	0.318	0.353	C2		IFT74	80173	8.64232e-59	-0.897687	0.06	0.307	C3
EFHD2	79180	2.62831e-49	24.6638	0.912	0.792	C0		MDH1	4190	0	13.9662	0.999	0.902	C1		PYROXD1	79912	0.00312749	-0.635803	0.419	0.447	C2		DCLRE1C	64421	6.43193e-53	-0.898144	0.045	0.269	C3
ELL2	22936	4.16489e-70	24.6563	0.869	0.726	C0		ECHS1	1892	0	13.9566	0.997	0.886	C1		RASEF	158158	5.36653e-06	-0.636333	0.308	0.368	C2		WDR89	112840	2.64459e-59	-0.898938	0.061	0.31	C3
DAPP1	27071	0.0025149	24.569	0.351	0.315	C0		EIF3H	8667	8.49381e-211	13.9184	0.999	0.937	C1		SLC9A1	6548	0.000128104	-0.638893	0.31	0.358	C2		RMDN3	55177	7.27496e-59	-0.89958	0.06	0.307	C3
HPRT1	3251	1.45321e-136	24.5454	0.753	0.809	C0		SYNE2	23224	1.00332e-285	13.8917	0.955	0.699	C1		RELA-DT	105369347	0.00311168	-0.639766	0.386	0.424	C2		PWWP2A	114825	1.29102e-65	-0.89968	0.071	0.344	C3
PLA2G2F	64600	5.65697e-118	24.5153	0.609	0.367	C0		HJURP	55355	0	13.8173	0.767	0.103	C1		FAAH	2166	0.00238038	-0.640685	0.4	0.442	C2		U2AF1L4	199746	5.20034e-65	-0.900094	0.037	0.294	C3
DEPP1	11067	2.49619e-98	24.508	0.446	0.225	C0		GLO1	2739	0	13.7753	0.997	0.864	C1		KIF2A	3796	5.67407e-05	-0.641118	0.652	0.58	C2		POMT1	10585	2.19543e-59	-0.900229	0.045	0.291	C3
NDUFV3	4731	7.18699e-09	24.5071	0.839	0.735	C0		GMPS	8833	0	13.7629	0.99	0.794	C1		MTF2	22823	1.09494e-07	-0.641516	0.632	0.535	C2		CDC37L1	55664	9.27056e-53	-0.900305	0.077	0.312	C3
TUBA4A	7277	1.95412e-29	24.5022	0.889	0.836	C0		ADAR	103	4.21654e-136	13.7537	0.913	0.727	C1		ST6GALNAC4	27090	2.76043e-11	-0.64383	0.275	0.364	C2		TRAPPC2	6399	2.16357e-60	-0.900328	0.064	0.317	C3
DANCR	57291	5.41363e-06	24.4247	0.869	0.814	C0		PTBP1	5725	0	13.7104	0.981	0.793	C1		RASA2	5922	0.00170833	-0.64392	0.29	0.329	C2		SMTN	6525	1.32009e-38	-0.900447	0.065	0.251	C3
ACSS2	55902	6.12949e-84	24.2571	0.839	0.68	C0		EPB41L2	2037	4.46845e-61	13.6957	0.453	0.261	C1		TCF19	6941	0.00294018	-0.645877	0.254	0.207	C2		TRAPPC11	60684	1.14988e-61	-0.900457	0.051	0.306	C3
VAMP7	6845	2.53229e-08	24.1782	0.68	0.595	C0		MZT1	440145	0	13.6937	0.978	0.692	C1		ZADH2	284273	0.00105838	-0.648843	0.402	0.345	C2		ETNK2	55224	5.98622e-55	-0.900502	0.053	0.287	C3
TERF2IP	54386	1.18331e-57	24.1234	0.891	0.749	C0		DNAJC21	134218	0	13.5524	0.998	0.883	C1		TTF1	7270	0.00585972	-0.649717	0.525	0.46	C2		DOHH	83475	6.41234e-62	-0.901491	0.039	0.288	C3
CYLD	1540	1.67041e-35	24.0515	0.487	0.351	C0		LARS	51520	1.1104e-224	13.4099	0.922	0.655	C1		SUMF1	285362	0.000217081	-0.650442	0.333	0.373	C2		ZMAT5	55954	2.52621e-52	-0.901597	0.055	0.282	C3
GDI1	2664	3.80382e-05	23.974	0.726	0.64	C0		SLC5A6	8884	1.28537e-155	13.351	0.889	0.662	C1		SART1	9092	0.00915976	-0.651391	0.663	0.597	C2		CXorf56	63932	5.5285e-59	-0.901869	0.081	0.336	C3
ZNF281	23528	0.000226703	23.9664	0.603	0.543	C0		ATP5F1D	513	1.40972e-292	13.3362	1	0.94	C1		FAM110C	642273	2.17617e-06	-0.653654	0.27	0.33	C2		TAPBPL	55080	1.43908e-56	-0.902749	0.049	0.287	C3
MED8	112950	3.0804e-42	23.8194	0.911	0.771	C0		TRIM59	286827	3.43082e-254	13.3001	0.571	0.188	C1		SLC25A23	79085	0.000749916	-0.656079	0.314	0.351	C2		FBXO25	26260	6.13301e-53	-0.903104	0.071	0.304	C3
EIF5A	1984	3.7882e-10	23.6876	0.992	0.91	C0		KIF11	3832	0	13.2723	0.731	0.149	C1		MBP	4155	0.00022511	-0.665824	0.332	0.276	C2		PYCR3	65263	4.12241e-61	-0.903225	0.057	0.312	C3
GSK3B	2932	3.94939e-07	23.4486	0.745	0.658	C0		NUCKS1	64710	0	13.2636	1	0.955	C1		GOLT1A	127845	8.63509e-06	-0.666714	0.398	0.45	C2		CSK	1445	2.60038e-56	-0.903346	0.071	0.314	C3
MUC5B	727897	1.80187e-14	23.3588	0.501	0.418	C0		MRPL41	64975	0	13.2506	1	0.936	C1		MED28	80306	0.00367143	-0.668728	0.619	0.551	C2		YAE1	57002	3.33375e-57	-0.903507	0.073	0.321	C3
MGST3	4259	3.97377e-08	23.3575	0.995	0.921	C0		RBBP7	5931	0	13.2216	0.996	0.839	C1		RDM1	201299	6.88317e-25	-0.67237	0.336	0.199	C2		RHBDL2	54933	2.0893e-53	-0.903699	0.049	0.277	C3
GSTK1	373156	2.7913e-99	23.3574	0.988	0.891	C0		CMC2	56942	0	13.2098	0.992	0.777	C1		NHS	4810	1.0048e-06	-0.672822	0.214	0.275	C2		AC139530.1		6.08138e-58	-0.904512	0.035	0.27	C3
VMA21	203547	8.41215e-16	23.3536	0.968	0.878	C0		PRDX4	10549	0	13.1909	0.998	0.919	C1		B3GALT6	126792	1.28892e-06	-0.674857	0.312	0.378	C2		FBXL4	26235	1.97104e-52	-0.904931	0.066	0.297	C3
CD81	975	5.36042e-49	23.3465	0.998	0.932	C0		COPS6	10980	0	13.1774	0.997	0.886	C1		MAP4K3	8491	0.00371826	-0.677785	0.302	0.339	C2		OXSM	54995	1.28414e-70	-0.905326	0.034	0.306	C3
CREBRF	153222	7.33055e-23	23.2484	0.386	0.28	C0		NDUFB10	4716	0	13.1749	1	0.94	C1		NIF3L1	60491	0.00283197	-0.678166	0.501	0.444	C2		PDE4A	5141	3.63479e-45	-0.905593	0.057	0.261	C3
FLII	2314	0.000237805	23.2255	0.669	0.593	C0		TOMM22	56993	0	13.1713	0.999	0.937	C1		ZNF516	9658	9.48425e-05	-0.678186	0.276	0.324	C2		CCNT2	905	1.31105e-62	-0.906194	0.062	0.322	C3
DKC1	1736	2.98992e-115	23.1637	0.823	0.834	C0		KCNK1	3775	4.43444e-194	13.1639	0.964	0.788	C1		ADGRF4	221393	0.00432713	-0.678381	0.239	0.274	C2		TNKS	8658	1.94035e-56	-0.906387	0.051	0.291	C3
ERGIC3	51614	2.60588e-11	23.1379	0.981	0.883	C0		SAP18	10284	9.68548e-295	13.1625	0.999	0.931	C1		BAZ2B	29994	0.000173307	-0.681474	0.228	0.276	C2		PGS1	9489	5.02552e-66	-0.90717	0.047	0.31	C3
TFG	10342	2.18421e-80	22.8737	0.996	0.9	C0		ENO1	2023	2.7366e-303	13.1622	1	0.98	C1		NDFIP1	80762	2.11669e-05	-0.68331	0.887	0.826	C2		ELMSAN1	91748	1.0461e-43	-0.907565	0.067	0.27	C3
LIPA	3988	4.27525e-14	22.8237	0.57	0.477	C0		PSMA1	5682	3.4838e-292	13.1594	0.998	0.885	C1		WDR44	54521	0.00354292	-0.685606	0.495	0.52	C2		HIVEP1	3096	2.54555e-51	-0.907722	0.047	0.268	C3
FAM3C	10447	8.53586e-56	22.8231	0.895	0.768	C0		NOSIP	51070	4.0698e-232	13.1541	0.977	0.833	C1		FBXO21	23014	0.0002309	-0.686597	0.519	0.548	C2		RARA	5914	9.78092e-56	-0.907746	0.047	0.281	C3
MACF1	23499	1.73436e-70	22.7027	0.868	0.75	C0		PPP2R1A	5518	4.11862e-230	13.1532	0.988	0.877	C1		ODF2L	57489	0.00324191	-0.687203	0.505	0.526	C2		NAGPA	51172	7.58943e-60	-0.908632	0.052	0.3	C3
PLCG2	5336	3.02591e-06	22.6684	0.381	0.327	C0		RPL4	6124	0	13.1488	1	0.956	C1		RPAP3	79657	0.000333313	-0.687965	0.634	0.557	C2		CEP290	80184	4.1694e-49	-0.909184	0.064	0.283	C3
MICALL1	85377	5.29541e-16	22.5958	0.547	0.454	C0		VPS26A	9559	1.35253e-151	13.1318	0.932	0.756	C1		DNASE1L1	1774	1.85809e-06	-0.688006	0.303	0.369	C2		RAB40C	57799	1.83704e-68	-0.909204	0.045	0.315	C3
ABCA12	26154	1.34832e-37	22.4789	0.462	0.34	C0		STAG2	10735	1.50684e-230	13.1288	0.965	0.794	C1		SEC24D	9871	3.51133e-06	-0.688641	0.236	0.293	C2		C1orf109	54955	7.53706e-46	-0.909456	0.072	0.283	C3
RHOD	29984	4.00241e-41	22.3653	0.98	0.867	C0		UBE2I	7329	0	13.1049	0.999	0.918	C1		EFCAB11	90141	3.90228e-05	-0.692807	0.43	0.365	C2		ERCC8	1161	2.67133e-62	-0.909604	0.063	0.321	C3
PRSS3	5646	5.53033e-16	22.3314	0.819	0.726	C0		ILF2	3608	0	13.081	0.999	0.886	C1		GLMP	112770	0.000148574	-0.696593	0.3	0.343	C2		MXI1	4601	1.03863e-56	-0.909605	0.054	0.293	C3
TMEM179B	374395	9.29489e-29	22.2314	0.988	0.89	C0		AK2	204	0	13.0773	0.993	0.858	C1		PTPRU	10076	0.00152912	-0.696872	0.3	0.335	C2		BCL2L2	599	7.88877e-55	-0.909991	0.067	0.306	C3
DNAJC7	7266	5.55193e-08	21.9321	0.886	0.81	C0		FLNA	2316	3.65253e-277	13.0487	0.991	0.806	C1		UBAP2L	9898	0.00216696	-0.697176	0.642	0.57	C2		UTP20	27340	7.99994e-54	-0.910325	0.065	0.299	C3
RPS6	6194	1.63769e-07	21.9245	1	0.972	C0		RALBP1	10928	2.2316e-209	13.0328	0.953	0.754	C1		THNSL2	55258	1.19723e-11	-0.697773	0.255	0.347	C2		LRTOMT	220074	1.67324e-55	-0.910712	0.051	0.286	C3
ACLY	47	1.99748e-13	21.9211	0.866	0.786	C0		PAXX	286257	0	13.0216	0.987	0.808	C1		WIZ	58525	0.000119617	-0.701833	0.315	0.361	C2		ST7L	54879	3.90619e-59	-0.911411	0.057	0.305	C3
CLDN7	1366	1.13589e-11	21.9142	0.989	0.924	C0		AC008771.1		1.02113e-197	13.0197	0.891	0.639	C1		LRCH4	4034	0.000531237	-0.703983	0.278	0.321	C2		BRMS1L	84312	2.95051e-60	-0.9123	0.06	0.312	C3
SMS	6611	1.16016e-11	21.9135	0.991	0.917	C0		HP1BP3	50809	3.68056e-268	13.0192	0.919	0.658	C1		YY1AP1	55249	0.000916918	-0.704025	0.352	0.391	C2		KIAA1671	85379	7.84037e-46	-0.912977	0.076	0.29	C3
RPL38	6169	1.06676e-18	21.9135	0.999	0.943	C0		IQGAP2	10788	8.18541e-81	13.0028	0.522	0.29	C1		SF3A3	10946	3.67181e-09	-0.704583	0.779	0.663	C2		SDHAF4	135154	6.93284e-59	-0.913707	0.053	0.3	C3
POLR2F	5435	9.39931e-05	21.9067	0.992	0.914	C0		DHRS7	51635	3.43829e-70	12.9817	0.943	0.812	C1		ATRN	8455	0.000456771	-0.706052	0.354	0.399	C2		LRRC28	123355	2.73776e-64	-0.914223	0.058	0.319	C3
SURF4	6836	4.46974e-45	21.9063	0.947	0.831	C0		PPID	5481	1.27017e-114	12.9809	0.882	0.699	C1		GID4	79018	3.51676e-08	-0.708819	0.219	0.289	C2		AKR1B15	441282	3.22076e-55	-0.915125	0.037	0.265	C3
CHMP2A	27243	2.98373e-30	21.9051	0.971	0.882	C0		MRPL54	116541	9.85642e-233	12.9357	0.979	0.829	C1		RCC1	1104	6.31664e-16	-0.70907	0.457	0.337	C2		RGL3	57139	5.73488e-63	-0.915322	0.039	0.291	C3
MPLKIP	136647	0.000457226	21.8539	0.937	0.828	C0		NGRN	51335	7.08874e-176	12.9269	0.935	0.73	C1		PPP2R3C	55012	0.00015832	-0.710965	0.478	0.408	C2		MST1R	4486	2.19235e-65	-0.915385	0.035	0.293	C3
MALSU1	115416	5.79155e-29	21.7891	0.953	0.865	C0		IMPDH1	3614	1.14694e-238	12.9056	0.954	0.765	C1		MRPL40	64976	4.42354e-05	-0.712716	0.883	0.785	C2		PDSS2	57107	4.77457e-63	-0.915452	0.064	0.324	C3
MRPL14	64928	1.3583e-14	21.7571	0.988	0.901	C0		INA	9118	9.31097e-78	12.8805	0.857	0.67	C1		HDAC3	8841	0.000116808	-0.713161	0.746	0.665	C2		RNF166	115992	6.81192e-59	-0.915679	0.043	0.286	C3
MAP7D3	79649	0.000391376	21.7524	0.736	0.668	C0		PKN1	5585	1.72395e-163	12.8518	0.829	0.553	C1		POLA2	23649	6.35277e-09	-0.713268	0.396	0.296	C2		CABIN1	23523	5.01022e-60	-0.916273	0.057	0.307	C3
EIF3G	8666	4.74712e-26	21.7158	0.996	0.905	C0		HSBP1	3281	0	12.7996	0.999	0.924	C1		E2F3	1871	0.000181669	-0.713765	0.401	0.341	C2		DVL2	1856	1.57595e-54	-0.916308	0.079	0.322	C3
TMEM106B	54664	5.7072e-39	21.6407	0.848	0.708	C0		MACC1	346389	1.04984e-108	12.7745	0.756	0.523	C1		BMPR2	659	0.00100982	-0.714491	0.412	0.446	C2		C20orf96	140680	1.77628e-59	-0.917159	0.053	0.301	C3
LARP1	23367	1.69665e-12	21.634	0.869	0.826	C0		BRD4	23476	4.07889e-212	12.748	0.951	0.771	C1		AIFM2	84883	0.00565593	-0.714497	0.508	0.451	C2		LIG3	3980	5.09731e-54	-0.917392	0.069	0.305	C3
ESF1	51575	2.92082e-09	21.5242	0.736	0.713	C0		OAF	220323	9.25314e-30	12.7239	0.395	0.258	C1		CCNH	902	0.000968471	-0.716592	0.554	0.486	C2		MCM3AP	8888	2.06318e-60	-0.917825	0.055	0.306	C3
ARPC3	10094	1.75299e-27	21.4726	1	0.939	C0		NSA2	10412	4.06585e-202	12.717	0.992	0.886	C1		KAT7	11143	0.00276884	-0.719214	0.403	0.438	C2		RPS6KA5	9252	6.12545e-46	-0.918265	0.048	0.251	C3
ALDH3B2	222	3.38203e-142	21.4358	0.892	0.704	C0		PFDN5	5204	2.25299e-278	12.7122	1	0.959	C1		CHST15	51363	2.5129e-07	-0.720503	0.286	0.355	C2		WHAMM	123720	2.80908e-57	-0.918373	0.075	0.324	C3
MCRIP2	84331	0.00152945	21.3746	0.902	0.824	C0		CIRBP	1153	4.87547e-145	12.7106	0.956	0.791	C1		PDLIM5	10611	7.29329e-08	-0.721089	0.655	0.67	C2		ADCK5	203054	2.53223e-65	-0.919289	0.038	0.296	C3
SDCBP2	27111	9.24526e-41	21.2678	0.601	0.453	C0		CCND3	896	7.46762e-214	12.6837	0.896	0.591	C1		COG6	57511	0.00197722	-0.722521	0.294	0.33	C2		MARCH9	92979	5.63906e-59	-0.919535	0.041	0.282	C3
UBE2D1	7321	4.81494e-05	21.23	0.632	0.562	C0		C11orf58	10944	1.46924e-301	12.6664	0.998	0.896	C1		FAM8A1	51439	3.63724e-06	-0.723344	0.21	0.27	C2		CCDC32	90416	5.7207e-62	-0.920041	0.049	0.302	C3
ABHD11	83451	8.44637e-28	21.1804	0.948	0.817	C0		ABCB6	10058	1.42555e-117	12.6529	0.875	0.669	C1		ERLIN2	11160	0.00153326	-0.724554	0.39	0.424	C2		C3orf38	285237	6.68726e-58	-0.920043	0.053	0.296	C3
HSD17B12	51144	5.98363e-23	21.1761	0.92	0.793	C0		NUS1	116150	1.67755e-45	12.6463	0.644	0.481	C1		FBXO8	26269	2.8102e-05	-0.724838	0.308	0.361	C2		STAT6	6778	2.98979e-51	-0.920491	0.079	0.311	C3
CCNG2	901	7.6075e-92	21.0896	0.587	0.372	C0		TRIM7	81786	2.3468e-229	12.6218	0.857	0.535	C1		FRYL	285527	0.000481465	-0.731275	0.382	0.419	C2		PIGW	284098	1.38277e-56	-0.920987	0.057	0.296	C3
CSRP1	1465	4.03047e-17	20.9693	0.901	0.785	C0		ACTR2	10097	9.12511e-233	12.6138	1	0.937	C1		LIN37	55957	0.000100784	-0.733001	0.319	0.366	C2		CCDC9	26093	4.41446e-59	-0.921936	0.041	0.282	C3
GPS2	2874	1.69261e-10	20.6384	0.705	0.713	C0		TMED8	283578	1.65772e-204	12.5076	0.838	0.545	C1		ZBTB10	65986	2.38957e-06	-0.736772	0.369	0.303	C2		TRIM32	22954	5.43631e-59	-0.922957	0.059	0.305	C3
CYSTM1	84418	0.00236681	20.4876	0.86	0.765	C0		GNPNAT1	64841	1.11e-255	12.4791	0.958	0.722	C1		NOM1	64434	0.000187515	-0.737503	0.537	0.451	C2		C7orf25	79020	6.18562e-59	-0.924298	0.063	0.311	C3
BRI3	25798	0.000508161	20.4735	0.998	0.927	C0		CDCA8	55143	0	12.4547	0.656	0.123	C1		HMGXB3	22993	0.00225857	-0.73825	0.444	0.476	C2		CALCOCO1	57658	8.34009e-49	-0.925047	0.051	0.266	C3
SLC25A5	292	2.64975e-63	20.4721	0.998	0.97	C0		PLRG1	5356	2.17944e-103	12.4321	0.826	0.609	C1		NIPSNAP3A	25934	0.00489146	-0.73843	0.457	0.487	C2		TMEM216	51259	2.50022e-62	-0.925074	0.065	0.323	C3
SLC25A3	5250	0.00257274	20.4721	0.998	0.945	C0		CCT4	10575	0	12.4265	1	0.933	C1		HSD17B8	7923	0.00735191	-0.73862	0.39	0.418	C2		TLK2	11011	4.09807e-54	-0.925162	0.059	0.293	C3
DDX58	23586	9.04222e-15	20.4721	0.281	0.204	C0		RAB34	83871	0	12.3973	0.996	0.858	C1		TMEM61	199964	0.000104424	-0.738847	0.347	0.393	C2		TRMT10A	93587	2.98897e-55	-0.925497	0.041	0.271	C3
ATP5ME	521	3.04044e-09	20.4721	0.993	0.915	C0		COX5A	9377	0	12.3931	0.999	0.922	C1		CAMK1D	57118	2.55393e-13	-0.739066	0.286	0.395	C2		ADO	84890	1.13045e-55	-0.925543	0.052	0.289	C3
TCEAL1	9338	1.76617e-87	20.472	0.803	0.642	C0		POLR2K	5440	0	12.3757	0.999	0.942	C1		ANXA6	309	8.70909e-05	-0.74182	0.387	0.433	C2		MBTD1	54799	5.82557e-59	-0.925642	0.051	0.297	C3
ELOC	6921	2.4002e-10	20.4606	0.987	0.899	C0		MRPL21	219927	1.99914e-278	12.3435	0.998	0.898	C1		LINC01833	107985879	5.7862e-06	-0.742212	0.215	0.272	C2		TRAPPC8	22878	1.23414e-66	-0.925695	0.06	0.33	C3
CLDN3	1365	1.75742e-34	20.4396	0.919	0.79	C0		SDF2L1	23753	4.80684e-188	12.3114	0.95	0.753	C1		TOR4A	54863	0.00519515	-0.743143	0.445	0.395	C2		PRELID2	153768	4.55164e-51	-0.925773	0.059	0.285	C3
SLC16A4	9122	2.34227e-279	20.3596	0.961	0.798	C0		DCTPP1	79077	0	12.3017	0.987	0.777	C1		ANO6	196527	0.00332417	-0.744505	0.386	0.416	C2		DIP2A	23181	2.48736e-59	-0.926068	0.045	0.289	C3
PIGP	51227	2.57665e-16	20.3362	0.864	0.745	C0		DESI2	51029	2.92149e-230	12.2828	0.952	0.739	C1		MAPRE3	22924	5.58893e-09	-0.744839	0.234	0.309	C2		PIAS4	51588	1.20432e-55	-0.926587	0.063	0.301	C3
EMC6	83460	5.81943e-05	20.316	0.985	0.878	C0		STMP1	647087	7.50962e-261	12.2622	0.996	0.912	C1		GLE1	2733	0.00231876	-0.746634	0.592	0.519	C2		CAPN15	6650	2.31933e-57	-0.926638	0.061	0.304	C3
LGALSL	29094	2.76203e-22	20.3149	0.503	0.403	C0		TSPYL1	7259	3.2565e-38	12.2483	0.793	0.654	C1		ATPAF1	64756	0.00191745	-0.746778	0.622	0.56	C2		ERC1	23085	5.99211e-48	-0.926857	0.066	0.283	C3
MARCH5	54708	1.4235e-08	20.2845	0.8	0.699	C0		PSMC1	5700	7.29271e-200	12.2149	0.962	0.781	C1		VPS26B	112936	6.16065e-05	-0.74914	0.327	0.374	C2		NOL4L	140688	1.37017e-51	-0.92754	0.075	0.306	C3
AMN	81693	2.38616e-29	20.255	0.411	0.294	C0		SDHB	6390	5.79194e-239	12.1881	0.98	0.829	C1		FBXO22	26263	0.00363147	-0.750126	0.702	0.623	C2		AP4M1	9179	4.90762e-62	-0.927615	0.046	0.298	C3
SMIM26	388789	6.89404e-41	20.0708	0.996	0.906	C0		RAD51AP1	10635	0	12.1753	0.936	0.28	C1		NPEPL1	79716	2.86671e-06	-0.750593	0.448	0.505	C2		ERCC5	2073	8.9183e-54	-0.927812	0.061	0.292	C3
HERPUD1	9709	6.14061e-118	20.0202	0.84	0.636	C0		SLC7A11	23657	1.18947e-191	12.171	0.893	0.65	C1		SH3BP1	23616	0.00341614	-0.75207	0.532	0.465	C2		ERI1	90459	3.23231e-57	-0.927817	0.053	0.294	C3
MRPS17	51373	1.85242e-16	20.0202	0.995	0.913	C0		SUMO3	6612	1.4249e-301	12.1652	0.996	0.891	C1		SNX30	401548	1.69824e-05	-0.752542	0.282	0.337	C2		BTBD3	22903	3.16744e-58	-0.928175	0.054	0.299	C3
TXNDC17	84817	1.49073e-05	20.0099	0.994	0.932	C0		SERINC3	10955	2.77256e-123	12.1631	0.987	0.895	C1		ATP7A	538	1.02582e-08	-0.755486	0.316	0.394	C2		MED24	9862	1.07556e-59	-0.928369	0.053	0.301	C3
CAPN2	824	1.66246e-34	19.9942	0.975	0.882	C0		SEH1L	81929	1.73178e-123	12.1574	0.655	0.373	C1		WDFY2	115825	1.16546e-05	-0.756419	0.342	0.398	C2		CHKB-DT	100144603	1.79696e-58	-0.928991	0.048	0.291	C3
PRXL2A	84293	0.000224498	19.9803	0.74	0.676	C0		CKAP2L	150468	0	12.1417	0.586	0.088	C1		SIGMAR1	10280	0.00072355	-0.75642	0.598	0.53	C2		TCF7L2	6934	1.23063e-43	-0.929679	0.062	0.263	C3
PRDX2	7001	0.00148595	19.7618	0.995	0.927	C0		CDC123	8872	1.87773e-220	12.1155	0.958	0.756	C1		ATG4A	115201	1.63962e-05	-0.757028	0.385	0.438	C2		PEX5	5830	2.51374e-60	-0.930698	0.066	0.321	C3
KDM5B	10765	3.00693e-122	19.7583	0.914	0.68	C0		WDR33	55339	1.50536e-288	12.1136	0.959	0.733	C1		SWSAP1	126074	5.11191e-05	-0.758414	0.392	0.438	C2		AC005562.1		1.68805e-61	-0.93077	0.051	0.304	C3
H2AFX	3014	0	19.7467	0.387	0.703	C0		GINM1	116254	1.81431e-224	12.1084	0.951	0.725	C1		ERCC4	2072	0.000741627	-0.760035	0.436	0.469	C2		MCAT	27349	1.24796e-66	-0.931093	0.046	0.312	C3
CTTN	2017	7.47152e-13	19.7021	0.997	0.921	C0		ARHGAP21	57584	6.90984e-118	12.1053	0.878	0.671	C1		TSPAN31	6302	4.40253e-08	-0.761535	0.378	0.451	C2		SMPDL3B	27293	1.2217e-52	-0.933015	0.033	0.251	C3
LTBP2	4053	5.47791e-31	19.4796	0.426	0.306	C0		GMNN	51053	0	12.0842	0.946	0.448	C1		CYBC1	79415	0.00384292	-0.761899	0.466	0.492	C2		DDHD1	80821	1.76054e-59	-0.933023	0.052	0.299	C3
GLCCI1	113263	5.1341e-141	19.4491	0.89	0.698	C0		MICOS13	125988	4.69633e-199	12.0637	0.993	0.895	C1		GBP2	2634	1.33211e-18	-0.763062	0.29	0.412	C2		DEAF1	10522	1.86499e-61	-0.93413	0.053	0.306	C3
RIPK2	8767	1.10994e-06	19.3273	0.672	0.606	C0		RFC2	5982	0	12.0635	0.948	0.49	C1		LHFPL2	10184	1.05531e-08	-0.765428	0.226	0.299	C2		TP53BP1	7158	7.7499e-58	-0.934455	0.076	0.326	C3
ANKRD10	55608	7.03245e-13	19.3063	0.471	0.525	C0		OCIAD1	54940	2.96142e-257	12.0217	0.997	0.892	C1		SS18	6760	6.17669e-05	-0.765793	0.541	0.476	C2		AC005670.3		9.17099e-68	-0.93492	0.042	0.31	C3
ATP6V1C1	528	6.79123e-05	19.1462	0.847	0.744	C0		MCM3	4172	0	11.992	0.871	0.345	C1		DAB2IP	153090	0.00830778	-0.768061	0.318	0.346	C2		POLK	51426	6.36005e-60	-0.935068	0.058	0.308	C3
NRARP	441478	1.18199e-33	19.1077	0.262	0.387	C0		CTPS1	1503	0	11.9916	0.851	0.458	C1		ZNF672	79894	3.88852e-05	-0.768552	0.35	0.394	C2		PHF21A	51317	3.15252e-52	-0.937472	0.057	0.282	C3
CD46	4179	5.16724e-24	19.0898	0.979	0.875	C0		SKA2	348235	0	11.985	0.971	0.635	C1		BRPF3	27154	7.68201e-05	-0.771316	0.349	0.394	C2		SLC38A6	145389	8.63739e-62	-0.937498	0.064	0.321	C3
SPINT2	10653	3.52378e-23	19.0294	0.999	0.968	C0		METTL26	84326	1.16021e-262	11.9759	0.996	0.883	C1		TANC2	26115	1.28468e-05	-0.772399	0.335	0.389	C2		VPS13B	157680	7.49959e-61	-0.937885	0.064	0.318	C3
DHCR24	1718	0.00170718	19.0294	0.973	0.905	C0		MRPL37	51253	0	11.9275	0.998	0.891	C1		ABCG2	9429	4.8881e-09	-0.77376	0.455	0.353	C2		GABPA	2551	2.84022e-65	-0.938571	0.048	0.311	C3
PTP4A2	8073	7.37366e-10	19.0293	0.996	0.922	C0		G3BP1	10146	0	11.8936	0.999	0.883	C1		C1orf115	79762	9.20245e-06	-0.775032	0.21	0.266	C2		NAGA	4668	5.87769e-54	-0.940019	0.073	0.31	C3
JUP	3728	1.90819e-48	19.0292	0.975	0.874	C0		NUDT8	254552	0	11.8819	0.982	0.764	C1		JMJD6	23210	6.93732e-06	-0.775523	0.442	0.367	C2		CEP164	22897	1.25833e-47	-0.940181	0.054	0.267	C3
CTNNB1	1499	2.89998e-30	19.0261	0.906	0.83	C0		CDCA7	83879	0	11.8552	0.713	0.184	C1		SPDL1	54908	2.73787e-31	-0.778191	0.442	0.266	C2		PCNX1	22990	1.45684e-59	-0.940572	0.052	0.299	C3
RNF103	7844	4.82841e-24	18.9996	0.46	0.347	C0		SNRPA1	6627	0	11.8292	0.993	0.832	C1		SPICE1	152185	0.00171252	-0.778562	0.377	0.415	C2		SERTAD4-AS1	574036	4.56903e-49	-0.940659	0.047	0.26	C3
IFI35	3430	1.21971e-38	18.9465	0.69	0.555	C0		CKAP5	9793	1.23481e-277	11.8281	0.902	0.611	C1		EPCAM	4072	8.58959e-07	-0.784154	0.998	0.936	C2		ELK1	2002	1.20956e-67	-0.941785	0.048	0.317	C3
HNRNPH1	3187	1.24014e-11	18.9462	0.95	0.891	C0		PAICS	10606	0	11.8028	0.979	0.709	C1		SHB	6461	9.05339e-06	-0.785136	0.317	0.376	C2		FBXO34	55030	1.53032e-51	-0.942349	0.089	0.323	C3
ZMYM5	9205	1.4768e-05	18.885	0.318	0.27	C0		LYRM4	57128	4.25992e-213	11.7996	0.916	0.677	C1		BLOC1S4	55330	0.00430011	-0.785159	0.519	0.539	C2		KPTN	11133	5.79439e-67	-0.942692	0.049	0.317	C3
B4GALT1	2683	2.60757e-12	18.789	0.839	0.769	C0		HMGN3	9324	4.93288e-280	11.7708	0.968	0.764	C1		ILKAP	80895	0.00411556	-0.786831	0.763	0.684	C2		BCDIN3D	144233	2.65408e-59	-0.943923	0.063	0.312	C3
ZNFX1	57169	0.00933126	18.6395	0.47	0.437	C0		ATP5PB	515	2.99976e-271	11.7353	0.999	0.931	C1		ACYP2	98	1.97965e-08	-0.788917	0.308	0.381	C2		NACC2	138151	8.51686e-62	-0.944865	0.068	0.328	C3
SPCS2	9789	1.09892e-05	18.5585	0.994	0.906	C0		SLC38A1	81539	5.17539e-246	11.7307	0.976	0.812	C1		ASB8	140461	1.58727e-06	-0.789249	0.406	0.465	C2		PHF13	148479	4.48743e-47	-0.944976	0.045	0.252	C3
SPATC1L	84221	4.73613e-06	18.5075	0.505	0.439	C0		NDUFAB1	4706	0	11.7236	1	0.954	C1		TMEM51	55092	1.11623e-05	-0.791958	0.262	0.316	C2		IQSEC1	9922	6.77766e-49	-0.945588	0.083	0.308	C3
VAMP2	6844	4.15152e-21	18.463	0.741	0.629	C0		HSPA1B	3304	3.39992e-197	11.7226	0.981	0.823	C1		PACSIN3	29763	0.00011746	-0.792627	0.529	0.465	C2		CBFA2T2	9139	2.3086e-61	-0.946062	0.061	0.317	C3
TMEM97	27346	2.96857e-164	18.4196	0.598	0.761	C0		LIMCH1	22998	5.1405e-167	11.7226	0.922	0.723	C1		GCA	25801	0.000149681	-0.793012	0.385	0.429	C2		TSEN54	283989	9.55032e-66	-0.946171	0.046	0.309	C3
HSF1	3297	0.000724652	18.4048	0.844	0.738	C0		SAR1A	56681	2.34351e-200	11.7213	0.98	0.822	C1		PODXL	5420	0.00949644	-0.795187	0.312	0.343	C2		CLK3	1198	5.21639e-66	-0.946235	0.055	0.323	C3
NUCB2	4925	4.74192e-08	18.3404	0.884	0.783	C0		POLR2I	5438	0	11.7198	0.999	0.915	C1		MTRNR2L8	100463486	2.6419e-06	-0.795265	0.39	0.445	C2		ELP2	55250	1.15908e-63	-0.946266	0.055	0.315	C3
ERO1A	30001	1.35155e-07	18.2569	0.72	0.698	C0		YWHAZ	7534	2.05533e-260	11.719	1	0.967	C1		MTM1	4534	4.91538e-07	-0.798258	0.294	0.357	C2		HEXD	284004	1.05735e-67	-0.946788	0.041	0.308	C3
DAD1	1603	9.24728e-06	18.19	0.995	0.923	C0		BOLA3	388962	0	11.7189	0.99	0.828	C1		C9orf85	138241	0.000250219	-0.798369	0.458	0.497	C2		RAPGEF6	51735	1.43293e-53	-0.94683	0.067	0.302	C3
PLK3	1263	7.4249e-11	18.1799	0.38	0.309	C0		PPP6R1	22870	4.70061e-155	11.7116	0.89	0.66	C1		MRTO4	51154	2.91112e-15	-0.801359	0.783	0.654	C2		PGBD2	267002	4.63729e-70	-0.94762	0.042	0.317	C3
CLMP	79827	1.63634e-28	18.0684	0.451	0.339	C0		EPN1	29924	1.05645e-210	11.711	0.986	0.846	C1		RAD51	5888	2.31097e-08	-0.803995	0.317	0.226	C2		SLC25A22	79751	6.71012e-62	-0.947815	0.043	0.294	C3
BCL10	8915	1.21199e-11	18.0674	0.718	0.624	C0		ARID1B	57492	7.73168e-92	11.7091	0.722	0.485	C1		EPHA1	2041	7.26573e-11	-0.804227	0.242	0.325	C2		TBC1D4	9882	4.63708e-46	-0.948337	0.061	0.269	C3
FDFT1	2222	7.0077e-11	18.0277	0.971	0.873	C0		WFDC3	140686	1.24402e-211	11.6913	0.953	0.75	C1		ZNF600	162966	0.00160704	-0.804581	0.254	0.21	C2		ATP6V1E2	90423	1.24661e-52	-0.949938	0.08	0.316	C3
HNRNPF	3185	0.00137968	18.0245	0.995	0.936	C0		ATP5MC1	516	0	11.6857	0.999	0.926	C1		ERMP1	79956	0.000278562	-0.809044	0.447	0.488	C2		EMSY	56946	4.96672e-60	-0.949957	0.064	0.317	C3
CCNL1	57018	1.4021e-12	17.8973	0.72	0.627	C0		PLAAT3	11145	9.09448e-159	11.6843	0.944	0.764	C1		NFKBIL1	4795	1.8176e-05	-0.813358	0.322	0.378	C2		ZNF830	91603	7.27097e-68	-0.949996	0.069	0.345	C3
FAM102A	399665	5.924e-12	17.7557	0.647	0.557	C0		NEK9	91754	2.92996e-55	11.6673	0.531	0.346	C1		SSBP4	170463	0.00191228	-0.814123	0.559	0.577	C2		TAF3	83860	2.77937e-44	-0.95009	0.076	0.283	C3
CHD2	1106	4.84976e-22	17.6692	0.681	0.574	C0		PRRC2C	23215	4.32889e-195	11.6625	0.98	0.841	C1		SLC2A10	81031	7.47481e-06	-0.817046	0.237	0.297	C2		STX18	53407	8.82957e-65	-0.950443	0.066	0.331	C3
NDUFB2	4708	0.000466835	17.6059	0.998	0.936	C0		IL1R2	7850	5.27637e-93	11.6581	0.358	0.145	C1		SNX29	92017	1.11264e-07	-0.818654	0.222	0.289	C2		METTL15	196074	2.68156e-68	-0.950787	0.06	0.333	C3
ZFPL1	7542	9.68585e-05	17.57	0.788	0.692	C0		RACGAP1	29127	0	11.6415	0.82	0.325	C1		LRG1	116844	0.000177976	-0.818987	0.291	0.337	C2		NFKB1	4790	2.27983e-51	-0.951375	0.054	0.279	C3
DLEU1	10301	3.25939e-54	17.5621	0.484	0.597	C0		GINS2	51659	0	11.628	0.937	0.337	C1		SNX14	57231	0.00187397	-0.822769	0.604	0.626	C2		TYW5	129450	1.2317e-61	-0.951664	0.059	0.314	C3
RAB9A	9367	1.72211e-108	17.544	0.904	0.748	C0		NXT1	29107	0	11.6179	0.939	0.672	C1		POLE2	5427	0.00101476	-0.823014	0.272	0.22	C2		KBTBD4	55709	1.82217e-64	-0.951937	0.062	0.327	C3
MCL1	4170	6.50526e-28	17.3246	0.749	0.609	C0		TFAP2C	7022	4.1066e-64	11.6114	0.951	0.842	C1		UBE3B	89910	0.00972886	-0.824664	0.379	0.404	C2		DCP1A	55802	2.52933e-61	-0.952166	0.065	0.322	C3
NDUFS4	4724	0.000123495	17.2419	0.963	0.838	C0		STOML2	30968	0	11.6052	0.998	0.895	C1		REEP4	80346	7.18786e-12	-0.825632	0.548	0.434	C2		STAU2	27067	1.65315e-59	-0.953084	0.062	0.311	C3
HIGD1A	25994	9.38933e-20	17.2337	0.939	0.826	C0		JPX	554203	4.60365e-124	11.5866	0.895	0.704	C1		ATAD5	79915	1.00789e-11	-0.827358	0.343	0.239	C2		RNFT1	51136	1.30404e-66	-0.953283	0.046	0.312	C3
CTNNBIP1	56998	8.29731e-19	17.1714	0.872	0.762	C0		MRPL42	28977	0	11.5704	0.994	0.848	C1		IL17RC	84818	9.0666e-09	-0.82832	0.278	0.354	C2		NUTM2A-AS1	728190	4.45989e-69	-0.95417	0.052	0.327	C3
ZMAT3	64393	8.65693e-41	17.0537	0.518	0.38	C0		SPCS1	28972	2.0385e-252	11.5659	1	0.943	C1		CLCN7	1186	0.000153138	-0.82832	0.322	0.366	C2		IQCB1	9657	9.8807e-59	-0.95425	0.048	0.291	C3
PNRC1	10957	2.01572e-250	16.9911	0.891	0.6	C0		COMMD2	51122	2.99694e-235	11.5448	0.947	0.716	C1		STK40	83931	0.00502147	-0.830144	0.283	0.317	C2		CHKB	1120	1.38916e-65	-0.954818	0.046	0.309	C3
PRRG4	79056	2.73792e-25	16.9535	0.707	0.731	C0		AURKAIP1	54998	0	11.5393	1	0.936	C1		EVPL	2125	4.89621e-05	-0.830241	0.258	0.308	C2		HGH1	51236	2.64574e-62	-0.955552	0.045	0.297	C3
RABGGTB	5876	0.00355241	16.951	0.834	0.742	C0		MAP1B	4131	1.72657e-96	11.5199	0.909	0.738	C1		UTP14A	10813	2.23275e-06	-0.832044	0.714	0.659	C2		GOLGA1	2800	4.78056e-57	-0.955868	0.071	0.318	C3
TMBIM1	64114	2.8698e-21	16.9213	0.749	0.634	C0		TPM1	7168	1.26663e-190	11.4746	0.974	0.836	C1		NFAT5	10725	0.00792651	-0.835082	0.429	0.456	C2		CD276	80381	1.46518e-58	-0.956245	0.064	0.311	C3
RAP2B	5912	4.26291e-05	16.8945	0.716	0.648	C0		GTF2I	2969	5.55896e-133	11.4557	0.992	0.907	C1		AMMECR1	9949	0.0054083	-0.836286	0.487	0.505	C2		GCFC2	6936	3.09205e-56	-0.956437	0.055	0.293	C3
DDA1	79016	8.02272e-11	16.7192	0.873	0.768	C0		CENPE	1062	3.03233e-227	11.4008	0.508	0.152	C1		C11orf54	28970	0.00253772	-0.837713	0.433	0.462	C2		TCAIM	285343	2.22431e-63	-0.956628	0.084	0.352	C3
SELENOS	55829	6.79109e-05	16.6669	0.944	0.838	C0		ACTR10	55860	2.1704e-123	11.3861	0.938	0.769	C1		THAP4	51078	0.00804661	-0.839396	0.674	0.604	C2		FKBP15	23307	3.89029e-59	-0.956867	0.062	0.311	C3
INHA	3623	2.83987e-27	16.6636	0.62	0.501	C0		CUL3	8452	9.14901e-180	11.3789	0.995	0.889	C1		SRGAP2	23380	0.00518095	-0.83982	0.41	0.359	C2		POLR3D	661	7.46955e-55	-0.957897	0.061	0.296	C3
XDH	7498	3.8528e-21	16.5225	0.34	0.252	C0		FGFR1OP	11116	2.51134e-153	11.3454	0.579	0.266	C1		ARV1	64801	6.82152e-08	-0.840635	0.727	0.638	C2		RCL1	10171	7.16295e-67	-0.958104	0.053	0.321	C3
DST	667	7.90122e-06	16.3371	0.514	0.459	C0		TUFM	7284	0	11.3286	0.998	0.909	C1		LRP5	4041	0.000483809	-0.842076	0.414	0.451	C2		UGGT2	55757	2.73515e-66	-0.958523	0.051	0.317	C3
CDKN1A	1026	0.000728336	16.3317	0.453	0.417	C0		UBA2	10054	0	11.3163	0.977	0.75	C1		KIFAP3	22920	2.73509e-08	-0.842653	0.332	0.406	C2		RBPMS	11030	2.2893e-57	-0.959324	0.052	0.294	C3
RBFOX2	23543	8.69314e-05	16.2318	0.525	0.467	C0		NOL7	51406	5.39004e-307	11.3119	0.998	0.902	C1		GBE1	2632	0.00717989	-0.842859	0.335	0.363	C2		SLX4IP	128710	4.06944e-63	-0.959476	0.07	0.332	C3
EPB41L4A-AS1	114915	7.26229e-73	16.2164	0.812	0.639	C0		OARD1	221443	1.02489e-175	11.295	0.892	0.639	C1		BICDL1	92558	1.7249e-09	-0.846242	0.338	0.422	C2		TRUB1	142940	3.60532e-59	-0.959494	0.077	0.332	C3
SGPL1	8879	3.44897e-16	16.2092	0.599	0.507	C0		POLR2J	5439	0	11.2929	1	0.913	C1		MALT1	10892	0.00330872	-0.848872	0.457	0.476	C2		NUP43	348995	2.11417e-57	-0.96016	0.06	0.304	C3
CLIC3	9022	4.71791e-185	16.1476	0.8	0.53	C0		TBCB	1155	5.57956e-257	11.2706	1	0.913	C1		BORCS5	118426	0.000284562	-0.850076	0.418	0.454	C2		SEMA4B	10509	7.7306e-51	-0.961643	0.067	0.294	C3
FBLN1	2192	3.76219e-15	16.1427	0.971	0.861	C0		CCDC34	91057	0	11.2449	0.986	0.655	C1		PDS5B	23047	0.000300351	-0.852298	0.638	0.559	C2		ATP11A	23250	1.16671e-90	-0.962371	0.116	0.457	C3
MRPS6	64968	1.41256e-51	16.1356	0.766	0.779	C0		CDC42EP5	148170	7.32555e-43	11.242	0.437	0.269	C1		KIF9	64147	5.06271e-05	-0.852549	0.618	0.542	C2		PRR5	55615	8.22795e-65	-0.962584	0.066	0.335	C3
TTC3	7267	4.52986e-34	16.1284	0.862	0.75	C0		MRPL51	51258	0	11.2417	1	0.957	C1		KIAA0040	9674	0.00132463	-0.85633	0.278	0.318	C2		MBD5	55777	2.56131e-59	-0.963146	0.061	0.309	C3
ZG16B	124220	1.05889e-58	16.1264	0.731	0.555	C0		TGM2	7052	7.33372e-16	11.233	0.258	0.175	C1		BCR	613	0.000335173	-0.85659	0.33	0.368	C2		SBF1	6305	2.49787e-55	-0.963526	0.058	0.294	C3
MED13	9969	1.35715e-24	16.1222	0.641	0.52	C0		KNSTRN	90417	2.39495e-280	11.2092	0.7	0.29	C1		MAP2K7	5609	0.000411905	-0.858638	0.46	0.495	C2		NAF1	92345	2.76764e-57	-0.963679	0.065	0.309	C3
SMIM4	440957	1.27679e-05	16.1079	0.729	0.637	C0		KIF20A	10112	4.66494e-195	11.1061	0.447	0.136	C1		NOMO1	23420	0.0024107	-0.859733	0.448	0.481	C2		ATP10D	57205	2.62274e-59	-0.965886	0.066	0.315	C3
NIT2	56954	0.00127196	16.0992	0.991	0.893	C0		SMC3	9126	0	11.094	0.97	0.613	C1		MLLT3	4300	2.41344e-06	-0.859864	0.362	0.424	C2		AKAP10	11216	1.14358e-59	-0.96627	0.052	0.299	C3
LSM12	124801	0.000140847	16.0695	0.891	0.825	C0		NUP50	10762	2.44451e-261	11.0865	0.848	0.491	C1		ATG4D	84971	2.63501e-07	-0.86086	0.471	0.525	C2		FASTKD5	60493	2.51359e-68	-0.966611	0.053	0.326	C3
BZW2	28969	5.76266e-16	16.0532	0.98	0.877	C0		BARD1	580	0	11.0663	0.936	0.307	C1		MFSD12	126321	2.55978e-05	-0.865764	0.25	0.304	C2		CPOX	1371	9.60563e-62	-0.967435	0.063	0.321	C3
TSPAN13	27075	0.000538825	16.0462	0.965	0.875	C0		THRAP3	9967	1.52697e-260	11.0583	0.969	0.774	C1		FBXO6	26270	0.000105869	-0.866918	0.315	0.362	C2		TSPYL5	85453	7.48869e-57	-0.967536	0.033	0.264	C3
CIB1	10519	1.93896e-06	15.9446	0.979	0.879	C0		THOC3	84321	0	11.0434	0.993	0.808	C1		CCDC58	131076	0.00976747	-0.8684	0.618	0.559	C2		THOC5	8563	1.32986e-62	-0.968427	0.065	0.324	C3
DDX5	1655	0.000137694	15.9335	0.98	0.875	C0		MAP3K20	51776	6.94873e-231	11.0397	0.988	0.848	C1		VAV3	10451	1.2749e-10	-0.872035	0.344	0.434	C2		CPLANE1	65250	5.1184e-55	-0.968714	0.09	0.334	C3
CCNI	10983	1.47578e-34	15.7827	0.989	0.893	C0		CEP55	55165	0	11.0361	0.783	0.254	C1		PCCB	5096	0.000103354	-0.872443	0.515	0.551	C2		NPC1	4864	5.22574e-49	-0.969168	0.047	0.26	C3
PDLIM7	9260	1.09249e-10	15.7361	0.724	0.632	C0		MKRN1	23608	6.93677e-131	11.0114	0.928	0.773	C1		DTL	51514	2.84309e-18	-0.874725	0.274	0.164	C2		B3GALT4	8705	3.49719e-55	-0.969253	0.062	0.299	C3
PAQR7	164091	1.6568e-27	15.7342	0.37	0.263	C0		ING2	3622	7.11304e-198	10.9884	0.795	0.463	C1		KIF13A	63971	6.45976e-06	-0.878457	0.338	0.397	C2		ACOX3	8310	1.28348e-66	-0.971817	0.046	0.311	C3
CAPG	822	1.43661e-64	15.6512	0.99	0.883	C0		MRPS10	55173	1.85613e-241	10.9786	0.978	0.833	C1		DIPK1A	388650	3.09797e-08	-0.879259	0.325	0.401	C2		MTMR4	9110	2.73268e-72	-0.972087	0.041	0.32	C3
PLTP	5360	2.19535e-34	15.6	0.903	0.76	C0		PAFAH1B2	5049	1.29326e-172	10.9758	0.85	0.571	C1		ESRP2	80004	6.56926e-05	-0.880468	0.274	0.324	C2		TOR1B	27348	1.11934e-53	-0.972279	0.075	0.311	C3
FAM177A1	283635	0.000336392	15.5879	0.94	0.846	C0		CHPT1	56994	0	10.9609	0.832	0.348	C1		PIAS1	8554	2.83898e-06	-0.880729	0.401	0.454	C2		KIAA0930	23313	3.44672e-52	-0.972842	0.082	0.317	C3
HECTD1	25831	0.00644931	15.5033	0.814	0.732	C0		CDC6	990	0	10.8997	0.75	0.227	C1		SMUG1	23583	2.01721e-05	-0.881578	0.493	0.539	C2		AP002360.1		4.02017e-56	-0.973309	0.044	0.278	C3
TNFRSF21	27242	5.75044e-15	15.4301	0.805	0.716	C0		FOXM1	2305	0	10.8802	0.827	0.228	C1		TTC17	55761	0.00024233	-0.881962	0.486	0.53	C2		STAT2	6773	3.13792e-49	-0.973707	0.06	0.279	C3
SDC1	6382	0.00316484	15.4175	0.745	0.682	C0		MAGEF1	64110	9.16048e-160	10.8188	0.933	0.732	C1		PARP2	10038	1.14934e-08	-0.88387	0.456	0.353	C2		NR2C1	7181	3.51405e-70	-0.974426	0.063	0.344	C3
APLP2	334	0.000161202	15.4139	0.973	0.871	C0		ACSL3	2181	5.61899e-223	10.8132	0.991	0.876	C1		GPR87	53836	2.07696e-09	-0.887231	0.366	0.444	C2		MOCS3	27304	1.41684e-70	-0.97451	0.061	0.342	C3
DNAJC4	3338	9.45818e-40	15.3839	0.925	0.785	C0		ARGLU1	55082	6.42331e-133	10.7717	0.887	0.689	C1		GPN1	11321	0.000848561	-0.887575	0.546	0.478	C2		DENND1A	57706	6.8168e-51	-0.974714	0.038	0.254	C3
ADGRF1	266977	5.57981e-06	15.3791	0.279	0.325	C0		CSNK2B	1460	0	10.7508	0.999	0.934	C1		HERC1	8925	9.71703e-05	-0.889167	0.34	0.391	C2		RAD9A	5883	3.72935e-63	-0.974853	0.041	0.295	C3
NUDT4	11163	3.94081e-16	15.275	0.845	0.746	C0		WWP1	11059	9.32766e-75	10.7083	0.873	0.715	C1		SGSM3	27352	2.48532e-05	-0.890495	0.426	0.473	C2		LAMB1	3912	1.75085e-62	-0.974897	0.038	0.288	C3
PREPL	9581	1.26634e-07	15.2504	0.59	0.511	C0		SETD7	80854	2.01775e-173	10.688	0.87	0.619	C1		AC079062.1		5.31517e-07	-0.890764	0.384	0.441	C2		ABRAXAS2	23172	2.0417e-62	-0.97534	0.06	0.318	C3
SNHG15	285958	1.9573e-21	15.2181	0.612	0.652	C0		C17orf49	124944	1.3626e-162	10.6792	0.941	0.768	C1		TMEM53	79639	8.74101e-12	-0.892624	0.351	0.435	C2		SLC25A38	54977	3.238e-55	-0.975602	0.055	0.292	C3
LCMT1	51451	2.31526e-05	15.1734	0.831	0.741	C0		DPM3	54344	4.36668e-118	10.6712	0.948	0.783	C1		UBQLN2	29978	1.25197e-15	-0.892907	0.486	0.566	C2		ANKRA2	57763	3.56184e-68	-0.975731	0.052	0.324	C3
UFM1	51569	9.99798e-33	15.0929	0.955	0.827	C0		PIGX	54965	0	10.6632	0.976	0.748	C1		ZNF326	284695	1.30438e-16	-0.892968	0.669	0.522	C2		MON2	23041	1.14951e-67	-0.975792	0.064	0.338	C3
ADIRF	10974	1.12122e-55	15.0832	0.834	0.693	C0		RPS20	6224	3.91967e-255	10.6277	0.997	0.909	C1		RECQL	5965	0.000348592	-0.894181	0.549	0.478	C2		POLE	5426	3.06069e-42	-0.976145	0.061	0.257	C3
SLC10A3	8273	2.64251e-56	14.9671	0.64	0.707	C0		AK4	205	1.99534e-145	10.62	0.58	0.274	C1		GINS1	9837	9.95447e-05	-0.894538	0.339	0.268	C2		PUDP	8226	2.17952e-55	-0.976154	0.057	0.292	C3
SRSF7	6432	4.4415e-70	14.9373	0.972	0.871	C0		KHDRBS1	10657	0	10.5937	0.998	0.888	C1		MRS2	57380	0.00316267	-0.897943	0.631	0.575	C2		PCSK7	9159	2.2917e-58	-0.976334	0.07	0.318	C3
CDV3	55573	0.000692138	14.935	0.891	0.829	C0		HNRNPM	4670	0	10.5714	0.997	0.892	C1		P4HTM	54681	1.38378e-07	-0.897985	0.429	0.495	C2		KLHDC4	54758	2.17389e-67	-0.976413	0.05	0.319	C3
LURAP1L	286343	2.63078e-108	14.9164	0.693	0.464	C0		MRPS26	64949	0	10.4958	0.999	0.921	C1		SF3A1	10291	0.00662045	-0.898682	0.585	0.528	C2		WBP1L	54838	2.77938e-49	-0.976616	0.062	0.28	C3
CAV2	858	7.02501e-09	14.865	0.543	0.593	C0		ORC6	23594	0	10.4836	0.931	0.306	C1		HEXIM2	124790	1.44418e-06	-0.910266	0.417	0.473	C2		ZNF143	7702	7.21242e-56	-0.97672	0.062	0.301	C3
STUM	375057	3.35537e-66	14.7768	0.278	0.124	C0		HDAC8	55869	9.40598e-66	10.4779	0.608	0.402	C1		PCTP	58488	0.000266458	-0.910616	0.402	0.434	C2		DBR1	51163	1.64207e-62	-0.977016	0.061	0.32	C3
ZNF770	54989	1.02904e-16	14.7181	0.611	0.522	C0		ITGAE	3682	0	10.4759	0.991	0.817	C1		WBP1	23559	0.0010821	-0.910987	0.438	0.468	C2		EPHB2	2048	2.67355e-55	-0.97753	0.057	0.293	C3
STK38L	23012	2.67551e-08	14.7102	0.314	0.258	C0		POLD2	5425	0	10.472	0.989	0.794	C1		LIF	3976	5.54007e-08	-0.911921	0.291	0.363	C2		MORC3	23515	2.28475e-49	-0.977606	0.042	0.254	C3
RPS27	6232	2.62326e-21	14.7014	1	0.984	C0		AP2M1	1173	0	10.4478	0.997	0.902	C1		SNHG18	100505806	0.000178901	-0.91666	0.297	0.342	C2		SNX19	399979	3.07474e-57	-0.977981	0.067	0.312	C3
SNCG	6623	9.45206e-56	14.7014	0.791	0.667	C0		MRPS11	64963	2.11134e-306	10.4384	0.982	0.771	C1		ARFRP1	10139	5.82741e-06	-0.917635	0.432	0.479	C2		RPS6KB1	6198	1.22298e-54	-0.978106	0.072	0.311	C3
TUBB2A	7280	0.00774535	14.7013	0.573	0.528	C0		CBX5	23468	0	10.4222	0.993	0.774	C1		PRTFDC1	56952	9.50088e-13	-0.918549	0.559	0.431	C2		NAXD	55739	8.22554e-65	-0.978131	0.064	0.33	C3
NME1	4830	4.83308e-28	14.7009	0.985	0.907	C0		NCAPH	23397	0	10.4046	0.818	0.176	C1		VPS13C	54832	0.000198453	-0.922899	0.351	0.394	C2		TRIM5	85363	1.90326e-46	-0.978543	0.065	0.276	C3
BCL2L1	598	1.77496e-15	14.7009	0.75	0.655	C0		VDAC3	7419	0	10.4007	0.992	0.831	C1		PLXNA2	5362	0.00593915	-0.923183	0.323	0.278	C2		ATE1	11101	6.89676e-63	-0.978827	0.059	0.318	C3
ATF5	22809	0.00491926	14.7006	0.625	0.62	C0		PPIH	10465	0	10.3964	0.986	0.735	C1		ATPAF2	91647	0.00569671	-0.92525	0.434	0.453	C2		AC004540.1		5.94547e-57	-0.979228	0.062	0.304	C3
ARL4C	10123	1.77792e-36	14.6993	0.45	0.566	C0		FEN1	2237	0	10.3757	0.913	0.331	C1		NUP50-DT	100506714	3.06907e-10	-0.92628	0.238	0.321	C2		FAM131A	131408	1.84424e-67	-0.979258	0.06	0.333	C3
JUND	3727	1.15221e-10	14.6917	0.988	0.881	C0		ASAP1	50807	4.64431e-242	10.3748	0.986	0.837	C1		PCF11	51585	0.00771235	-0.92642	0.444	0.405	C2		TMEM92	162461	1.63983e-40	-0.979306	0.064	0.255	C3
CD47	961	0.000612005	14.6913	0.989	0.9	C0		ITPA	3704	4.4909e-277	10.358	0.988	0.858	C1		CCSAP	126731	2.20348e-15	-0.928358	0.409	0.291	C2		CDK8	1024	8.48844e-55	-0.980768	0.04	0.268	C3
SUDS3	64426	4.82066e-06	14.6722	0.812	0.768	C0		CSE1L	1434	0	10.3556	0.993	0.745	C1		FNBP1	23048	0.000747974	-0.930035	0.45	0.478	C2		MMUT	4594	9.12759e-71	-0.981339	0.047	0.326	C3
TGFBR1	7046	6.38892e-07	14.672	0.741	0.669	C0		ARHGEF12	23365	1.08565e-52	10.3408	0.6	0.417	C1		GAR1	54433	0.000128667	-0.931093	0.659	0.59	C2		TSPAN10	83882	4.12183e-60	-0.982119	0.049	0.298	C3
SREBF1	6720	5.06688e-44	14.6638	0.787	0.67	C0		PAFAH1B3	5050	0	10.3331	0.998	0.871	C1		SLC22A23	63027	8.26944e-10	-0.932518	0.262	0.344	C2		SACM1L	22908	7.2677e-67	-0.982276	0.043	0.309	C3
GBP3	2635	2.00736e-96	14.5567	0.617	0.402	C0		MCM4	4173	0	10.3306	0.859	0.365	C1		RNF43	54894	1.7101e-05	-0.934623	0.325	0.381	C2		MBD1	4152	1.01998e-54	-0.982377	0.062	0.297	C3
SLC50A1	55974	6.54839e-61	14.5559	0.928	0.779	C0		SNRPD3	6634	0	10.3215	0.996	0.861	C1		ROCK2	9475	0.00199399	-0.936526	0.64	0.557	C2		GRIN2D	2906	3.62611e-49	-0.982555	0.041	0.252	C3
FOXO3	2309	2.29492e-37	14.5469	0.745	0.616	C0		HINT3	135114	2.06237e-40	10.2923	0.575	0.413	C1		HIF1AN	55662	9.0103e-09	-0.937029	0.372	0.443	C2		COG7	91949	8.9644e-63	-0.983595	0.066	0.326	C3
NFE4	58160	3.7125e-22	14.5003	0.671	0.706	C0		ANP32B	10541	0	10.2902	1	0.935	C1		NUP54	53371	0.00391062	-0.937344	0.61	0.537	C2		TCTA	6988	1.9938e-57	-0.98375	0.066	0.311	C3
ADGRG1	9289	2.47072e-31	14.4933	0.834	0.72	C0		SRI	6717	1.78616e-159	10.2895	0.999	0.922	C1		MYO9B	4650	0.000213527	-0.938142	0.306	0.351	C2		CIAO3	64428	2.02937e-74	-0.984191	0.055	0.345	C3
RER1	11079	8.57217e-10	14.4779	0.988	0.896	C0		RPL26L1	51121	1.95667e-263	10.2857	0.998	0.904	C1		KYAT3	56267	0.00135197	-0.938537	0.505	0.537	C2		ADAMTS12	81792	5.74483e-52	-0.984762	0.043	0.263	C3
IRS1	3667	6.63417e-22	14.3998	0.471	0.367	C0		POLR3K	51728	0	10.2839	0.979	0.714	C1		CCDC9B	388115	1.12635e-09	-0.939476	0.183	0.26	C2		CNEP1R1	255919	3.25799e-61	-0.985312	0.054	0.307	C3
TMEM80	283232	2.71798e-07	14.388	0.353	0.293	C0		HSPA8	3312	0	10.2804	1	0.952	C1		ZGPAT	84619	1.69635e-06	-0.940534	0.371	0.425	C2		KCTD18	130535	3.82211e-68	-0.986384	0.068	0.344	C3
MED21	9412	6.3436e-22	14.3601	0.847	0.785	C0		COPS9	150678	0	10.2804	0.999	0.94	C1		EPS8L2	64787	6.37227e-06	-0.941036	0.503	0.547	C2		MFAP3L	9848	1.53982e-47	-0.986916	0.055	0.266	C3
ADAM17	6868	0.000293113	14.3566	0.76	0.679	C0		TPI1	7167	0	10.2799	1	0.963	C1		LINP1	108570035	0.000706971	-0.941887	0.346	0.294	C2		HECTD4	283450	2.93697e-65	-0.986937	0.063	0.329	C3
RAPH1	65059	4.1445e-56	14.3284	0.571	0.405	C0		RPL5	6125	0	10.2799	1	0.989	C1		KLC3	147700	0.00259649	-0.94422	0.414	0.45	C2		PARP12	64761	2.47647e-58	-0.987038	0.042	0.282	C3
TBC1D31	93594	6.12954e-69	14.2946	0.132	0.296	C0		LTV1	84946	4.99731e-110	10.2798	0.796	0.562	C1		SAFB	6294	0.00660094	-0.944303	0.594	0.523	C2		RAD18	56852	1.21366e-49	-0.987567	0.059	0.278	C3
STAT3	6774	2.44875e-51	14.2911	0.794	0.642	C0		ANP32A	8125	0	10.2764	0.991	0.848	C1		LPCAT1	79888	2.73954e-08	-0.945033	0.518	0.418	C2		CCDC117	150275	1.4787e-59	-0.98763	0.071	0.323	C3
RAB25	57111	1.4051e-46	14.1878	0.965	0.843	C0		CCT6A	908	0	10.2763	1	0.972	C1		SPIRE2	84501	6.94736e-05	-0.946277	0.288	0.332	C2		ZXDC	79364	2.82613e-58	-0.987668	0.076	0.327	C3
PROM2	150696	5.40069e-32	14.038	0.784	0.666	C0		OLA1	29789	1.62086e-304	10.2763	0.999	0.896	C1		ATF6	22926	0.00166648	-0.948036	0.422	0.452	C2		AC060780.1		1.2855e-53	-0.988129	0.038	0.262	C3
CLK1	1195	0.000971117	14.0275	0.554	0.498	C0		RPS10	6204	9.51699e-294	10.271	1	0.952	C1		GNL2	29889	0.00324475	-0.949846	0.554	0.48	C2		EXOC3-AS1	116349	1.39219e-59	-0.988515	0.046	0.291	C3
TENM3	55714	0.00107376	14.014	0.28	0.315	C0		RUVBL1	8607	0	10.254	0.99	0.825	C1		NRCAM	4897	3.04225e-12	-0.950338	0.243	0.341	C2		MAPK8	5599	3.41289e-65	-0.988743	0.057	0.323	C3
TOB1	10140	7.99347e-78	13.991	0.882	0.713	C0		MTRF1L	54516	3.33093e-51	10.2533	0.6	0.419	C1		BNIP2	663	0.00831769	-0.950994	0.498	0.454	C2		PATZ1	23598	1.30099e-52	-0.989128	0.065	0.297	C3
ZBTB38	253461	0.00320701	13.9899	0.644	0.591	C0		HNRNPUL1	11100	0	10.2353	0.973	0.78	C1		ARHGAP1	392	0.00102728	-0.953407	0.524	0.555	C2		PIGBOS1	101928527	1.40184e-60	-0.989263	0.043	0.29	C3
FEM1C	56929	1.71243e-10	13.8413	0.437	0.364	C0		SYPL1	6856	1.25958e-249	10.2274	0.997	0.909	C1		TNFRSF19	55504	8.5701e-16	-0.954628	0.149	0.25	C2		SP2	6668	1.67702e-62	-0.989571	0.042	0.294	C3
SSPN	8082	1.52671e-23	13.7531	0.678	0.581	C0		CDK4	1019	0	10.2221	0.986	0.702	C1		LPCAT4	254531	0.000310436	-0.955551	0.25	0.296	C2		AP1M1	8907	2.74015e-63	-0.990105	0.066	0.327	C3
PRMT5	10419	2.15377e-16	13.7529	0.566	0.605	C0		ITGB3BP	23421	0	10.222	0.986	0.601	C1		RETSAT	54884	0.00041137	-0.956649	0.326	0.37	C2		MID1	4281	2.3452e-46	-0.990429	0.052	0.26	C3
YBEY	54059	2.36667e-12	13.7439	0.704	0.6	C0		DNAJC19	131118	1.42236e-219	10.2159	0.993	0.864	C1		RNF139	11236	0.00139656	-0.957347	0.417	0.452	C2		MANBA	4126	1.2672e-61	-0.99054	0.077	0.336	C3
TMEM50A	23585	1.73759e-27	13.7315	0.967	0.865	C0		FAM49A	81553	0.00142366	10.187	0.539	0.488	C1		CNN2	1265	9.72491e-07	-0.958179	0.639	0.551	C2		LYSMD3	116068	1.3137e-48	-0.990578	0.084	0.307	C3
MAPKAPK5-AS1	51275	0.000269425	13.7193	0.444	0.396	C0		ETF1	2107	3.73502e-178	10.1666	0.964	0.8	C1		MTHFD1	4522	1.06393e-09	-0.958866	0.537	0.422	C2		ZMIZ1	57178	1.60678e-53	-0.990749	0.059	0.29	C3
CTSH	1512	6.95006e-88	13.7092	0.943	0.803	C0		IER5L	389792	8.04385e-164	10.1352	0.902	0.689	C1		SLC9A7	84679	0.000132809	-0.961457	0.222	0.271	C2		RIOX1	79697	1.77722e-53	-0.990945	0.101	0.345	C3
STAM	8027	0.00856886	13.6295	0.645	0.595	C0		MEAF6	64769	0	10.1207	0.999	0.89	C1		PRMT3	10196	0.00495245	-0.962824	0.486	0.436	C2		LFNG	3955	4.59352e-50	-0.99182	0.067	0.29	C3
ZDHHC3	51304	8.53186e-08	13.5455	0.795	0.691	C0		RCN1	5954	1.64326e-228	10.0986	0.992	0.884	C1		CDC42EP4	23580	0.000234205	-0.965381	0.343	0.387	C2		ZNF766	90321	3.12657e-59	-0.992858	0.064	0.315	C3
SPINT1	6692	9.89351e-52	13.5429	0.909	0.753	C0		MYDGF	56005	9.14911e-179	10.0918	0.999	0.908	C1		ABHD17A	81926	0.00241068	-0.966754	0.522	0.54	C2		POC5	134359	2.2519e-43	-0.993565	0.09	0.3	C3
ATF4	468	1.37446e-05	13.5361	0.926	0.811	C0		TMEM14B	81853	0	10.0917	0.999	0.913	C1		ACOT11	26027	2.4066e-12	-0.967874	0.214	0.306	C2		CAAP1	79886	1.78489e-63	-0.994011	0.089	0.361	C3
MED10	84246	8.52077e-15	13.5293	0.971	0.86	C0		CHCHD3	54927	0	10.0843	0.987	0.788	C1		UXS1	80146	0.00976252	-0.970664	0.586	0.594	C2		MUS81	80198	4.2824e-57	-0.994382	0.074	0.32	C3
SIM2	6493	1.35382e-06	13.5178	0.26	0.213	C0		BUD23	114049	0	10.0826	0.997	0.899	C1		PIK3C2B	5287	0.00304363	-0.97583	0.414	0.441	C2		TAOK2	9344	1.59126e-55	-0.994586	0.07	0.311	C3
ANXA7	310	0.00193981	13.5151	0.954	0.843	C0		IRF3	3661	8.21555e-166	10.0721	0.921	0.708	C1		HMCES	56941	0.00697435	-0.977256	0.624	0.563	C2		EEF1AKNMT	51603	3.6971e-69	-0.994801	0.055	0.332	C3
CAMTA2	23125	1.03055e-12	13.4903	0.317	0.242	C0		PSMD2	5708	2.22012e-281	10.0687	0.997	0.902	C1		FARP1	10160	7.7694e-06	-0.977766	0.712	0.716	C2		CAMSAP3	57662	1.97931e-60	-0.995012	0.052	0.303	C3
DCXR	51181	2.12269e-05	13.4434	0.983	0.875	C0		LINC00467	84791	1.95318e-152	10.0447	0.913	0.705	C1		CHD9	80205	1.88147e-06	-0.978819	0.476	0.517	C2		KIAA0355	9710	3.66281e-52	-0.995455	0.059	0.287	C3
POLD4	57804	4.04947e-181	13.4415	0.953	0.794	C0		DR1	1810	2.39493e-173	10.0141	0.829	0.549	C1		TENT2	167153	5.02549e-06	-0.979684	0.486	0.532	C2		ZNF121	7675	2.2199e-62	-0.997159	0.054	0.311	C3
EPS15	2060	2.51952e-25	13.3628	0.79	0.672	C0		VKORC1	79001	0	10.0096	0.988	0.751	C1		HAUS1	115106	5.51151e-09	-0.980533	0.573	0.451	C2		HPS6	79803	5.9942e-74	-0.997811	0.054	0.342	C3
TMEM265	100862671	8.67429e-67	13.3291	0.944	0.794	C0		DNAJB1	3337	3.0264e-243	9.99925	0.891	0.599	C1		FUT8	2530	0.00376919	-0.982188	0.48	0.498	C2		CLN6	54982	6.6345e-61	-0.997839	0.052	0.303	C3
GSTP1	2950	1.78292e-05	13.2587	0.999	0.976	C0		SAE1	10055	0	9.99364	0.954	0.607	C1		HNRNPL	3191	9.17534e-05	-0.98774	0.767	0.679	C2		UBE4B	10277	3.70563e-65	-0.997884	0.061	0.326	C3
COX6C	1345	2.72319e-18	13.2587	0.999	0.959	C0		ERGIC2	51290	0	9.98087	0.998	0.883	C1		CFL2	1073	0.0018987	-0.987846	0.457	0.401	C2		NLE1	54475	4.2056e-63	-0.99863	0.055	0.314	C3
NDUFV2	4729	0.00465031	13.2587	0.986	0.884	C0		RO60	6738	1.93068e-72	9.96264	0.705	0.486	C1		THAP7	80764	1.89588e-05	-0.989669	0.422	0.473	C2		C1orf112	55732	7.21257e-49	-0.998752	0.047	0.26	C3
UCHL1	7345	2.90638e-42	13.2585	0.506	0.628	C0		SSRP1	6749	0	9.95382	0.998	0.822	C1		UMAD1	729852	0.00100719	-0.990757	0.457	0.492	C2		FCHSD2	9873	1.44811e-56	-0.999034	0.05	0.289	C3
IQGAP1	8826	2.43153e-43	13.2573	0.986	0.896	C0		PPP1CA	5499	0	9.87742	0.999	0.943	C1		PUS1	80324	7.47231e-06	-0.991397	0.383	0.316	C2		NSMCE3	56160	2.27577e-66	-0.999114	0.062	0.331	C3
HSD3B1	3283	9.39098e-26	13.2551	0.567	0.46	C0		NCAPG	64151	0	9.84243	0.738	0.162	C1		TBC1D23	55773	8.35285e-05	-0.992009	0.659	0.678	C2		ADGRL1	22859	1.06287e-49	-0.999342	0.081	0.308	C3
IGBP1	3476	3.76096e-89	13.2358	0.922	0.753	C0		ZMAT2	153527	8.05086e-175	9.83089	0.958	0.812	C1		TRIAP1	51499	9.75808e-06	-0.99314	0.798	0.699	C2		NBEAL2	23218	2.29065e-49	-1.00027	0.06	0.278	C3
LRATD2	157638	3.21968e-11	13.2287	0.768	0.664	C0		ANAPC16	119504	3.9181e-242	9.82739	0.997	0.904	C1		GLB1	2720	6.72626e-06	-0.993246	0.45	0.492	C2		MAST2	23139	7.92713e-54	-1.00106	0.063	0.297	C3
AMOTL2	51421	2.49248e-06	13.2234	0.637	0.587	C0		TMEM14A	28978	0	9.78819	0.987	0.811	C1		CDS2	8760	0.000358444	-0.993507	0.503	0.53	C2		E2F6	1876	1.19551e-69	-1.0012	0.052	0.328	C3
CRYBG1	202	0.000132784	13.2213	0.824	0.759	C0		CLPTM1	1209	7.36429e-140	9.7864	0.928	0.752	C1		GRB10	2887	9.88905e-05	-0.994946	0.259	0.306	C2		MED15	51586	7.0086e-64	-1.0016	0.068	0.334	C3
CTNNAL1	8727	9.65405e-77	13.084	0.159	0.344	C0		PSMD13	5719	4.38613e-229	9.77645	0.98	0.8	C1		TEN1	100134934	0.000960475	-0.995203	0.49	0.522	C2		DGCR2	9993	6.14051e-46	-1.0018	0.079	0.292	C3
PPP1R13L	10848	1.28883e-24	12.9793	0.618	0.5	C0		SLC25A11	8402	0	9.76745	0.981	0.794	C1		EIF2AK2	5610	3.09279e-07	-0.995956	0.868	0.765	C2		TBC1D14	57533	1.07024e-50	-1.00191	0.08	0.312	C3
TMEM107	84314	3.53468e-65	12.9292	0.598	0.688	C0		MBOAT7	79143	9.11903e-242	9.72398	0.999	0.927	C1		EFTUD2	9343	0.000126133	-0.998064	0.593	0.519	C2		VAMP5	10791	1.14525e-54	-1.00274	0.046	0.276	C3
RAB5C	5878	1.46241e-08	12.8885	0.987	0.877	C0		HELLS	3070	0	9.71051	0.908	0.29	C1		ARMC8	25852	0.00337899	-1.00296	0.444	0.47	C2		USF3	205717	3.98442e-57	-1.00287	0.09	0.341	C3
RNMT	8731	2.73327e-11	12.8752	0.703	0.607	C0		ATP1B3	483	0	9.6911	0.997	0.849	C1		AC004233.2		2.08137e-07	-1.00371	0.306	0.375	C2		ENDOD1	23052	3.96359e-47	-1.00363	0.071	0.287	C3
TSG101	7251	8.38194e-18	12.8388	0.994	0.883	C0		EMC10	284361	3.31509e-144	9.64555	0.952	0.777	C1		TRPS1	7227	3.90478e-14	-1.00409	0.249	0.357	C2		VPS8	23355	1.4112e-70	-1.00665	0.066	0.347	C3
VCL	7414	0.00610502	12.8204	0.688	0.628	C0		DBF4	10926	0	9.64266	0.912	0.371	C1		GMDS	2762	0.00152997	-1.00562	0.481	0.504	C2		TTLL7	79739	1.53892e-50	-1.00764	0.059	0.282	C3
LRP11	84918	1.64358e-15	12.808	0.572	0.48	C0		SPC25	57405	0	9.63928	0.835	0.184	C1		PKP3	11187	0.00638127	-1.01214	0.664	0.658	C2		ZNF721	170960	1.95763e-63	-1.00768	0.069	0.332	C3
SPTY2D1	144108	2.62458e-11	12.8024	0.797	0.712	C0		ALG3	10195	1.04192e-234	9.63578	0.983	0.825	C1		ZNRF3	84133	4.72962e-08	-1.0163	0.286	0.358	C2		DUSP22	56940	4.26609e-63	-1.00774	0.072	0.334	C3
BHLHE40	8553	2.42215e-11	12.7421	0.318	0.253	C0		URI1	8725	2.79512e-216	9.62501	0.955	0.774	C1		IL6ST	3572	0.0062107	-1.0178	0.356	0.386	C2		GXYLT1	283464	3.10607e-57	-1.00777	0.073	0.321	C3
CHPF	79586	5.29933e-63	12.7261	0.873	0.718	C0		DEF8	54849	2.28583e-178	9.61028	0.893	0.668	C1		DCAF10	79269	1.07847e-07	-1.01805	0.38	0.442	C2		APPBP2	10513	8.82185e-71	-1.00779	0.075	0.361	C3
SEC31A	22872	8.85082e-40	12.6934	0.721	0.576	C0		MAPK1IP1L	93487	7.27718e-180	9.60686	0.907	0.67	C1		CES2	8824	1.57849e-11	-1.01849	0.28	0.368	C2		FZR1	51343	1.15761e-53	-1.00805	0.073	0.308	C3
LINC02762	283140	6.08736e-09	12.6929	0.283	0.226	C0		USP14	9097	6.47787e-201	9.59745	0.941	0.729	C1		SERGEF	26297	0.00274516	-1.01982	0.504	0.523	C2		IFT88	8100	3.87501e-67	-1.0081	0.046	0.313	C3
GATA3	2625	2.7095e-62	12.608	0.815	0.662	C0		RPL7L1	285855	1.18522e-219	9.59215	0.944	0.732	C1		WASHC1	100287171	8.70409e-05	-1.02133	0.404	0.448	C2		VAC14	55697	9.19251e-64	-1.00813	0.053	0.314	C3
ZBTB43	23099	0.0046476	12.6069	0.357	0.327	C0		EIF4G1	1981	7.46084e-207	9.56857	0.989	0.882	C1		CPVL	54504	0.00230615	-1.02258	0.636	0.564	C2		EXOC4	60412	1.48557e-63	-1.00829	0.086	0.356	C3
PDCD4	27250	9.38947e-86	12.6026	0.641	0.433	C0		NAPRT	93100	8.59108e-71	9.52098	0.755	0.556	C1		SKA3	221150	6.60299e-06	-1.02298	0.258	0.194	C2		SPACA9	11092	1.94836e-58	-1.00915	0.066	0.315	C3
PLP2	5355	1.17716e-35	12.525	0.948	0.87	C0		LRRC58	116064	5.4765e-296	9.51634	0.928	0.633	C1		HERC3	8916	1.17515e-07	-1.0259	0.27	0.341	C2		FRMD8	83786	1.17626e-59	-1.00953	0.046	0.291	C3
MLF1	4291	4.01938e-06	12.5208	0.601	0.531	C0		RRM1	6240	0	9.45293	0.911	0.403	C1		RFC5	5985	8.47107e-20	-1.02673	0.555	0.38	C2		HID1	283987	7.81829e-64	-1.00966	0.076	0.342	C3
OSMR	9180	3.21091e-29	12.517	0.6	0.495	C0		FCF1	51077	7.34407e-113	9.45221	0.752	0.5	C1		EXOC7	23265	0.00134513	-1.02938	0.313	0.352	C2		ACAD8	27034	2.67979e-63	-1.01109	0.053	0.312	C3
CLDND1	56650	0.00965148	12.4841	0.563	0.555	C0		HARS	3035	2.70826e-162	9.43643	0.867	0.597	C1		TOP2B	7155	7.97685e-05	-1.0311	0.518	0.551	C2		PLEKHM1	9842	1.18668e-47	-1.01119	0.065	0.279	C3
RPAIN	84268	5.75292e-16	12.482	0.517	0.57	C0		BTBD1	53339	7.29127e-76	9.42702	0.564	0.334	C1		ACY1	95	0.000340583	-1.03858	0.406	0.439	C2		TRIM23	373	5.43451e-62	-1.01138	0.066	0.325	C3
FAM210B	116151	4.28966e-18	12.441	0.714	0.61	C0		C7orf50	84310	0	9.35678	0.993	0.863	C1		IMPACT	55364	0.00573502	-1.03867	0.475	0.498	C2		SLC35A5	55032	1.14078e-72	-1.01169	0.053	0.339	C3
AC110619.1		6.2518e-45	12.4038	0.281	0.15	C0		ARMT1	79624	1.2077e-138	9.32209	0.793	0.526	C1		NCOA2	10499	2.86592e-10	-1.04297	0.286	0.367	C2		AGK	55750	1.63758e-64	-1.01301	0.059	0.321	C3
SH3YL1	26751	1.20325e-08	12.4012	0.935	0.837	C0		ATG3	64422	7.15023e-251	9.29952	0.978	0.809	C1		RB1	5925	0.00542538	-1.04359	0.409	0.44	C2		MCU	90550	7.22419e-62	-1.01342	0.073	0.334	C3
ERCC1	2067	1.37499e-34	12.3937	0.916	0.777	C0		ASPM	259266	7.85037e-304	9.29904	0.667	0.213	C1		TMEM127	55654	0.000766159	-1.04651	0.417	0.448	C2		SLC9A6	10479	1.42253e-65	-1.01364	0.073	0.345	C3
PPP1R14B-AS1	105369340	1.83571e-15	12.3583	0.675	0.581	C0		NRDC	4898	5.65591e-163	9.29663	0.963	0.824	C1		MCEE	84693	5.91934e-08	-1.04806	0.318	0.391	C2		CDK11A	728642	4.41281e-64	-1.01391	0.065	0.328	C3
YIPF2	78992	2.14191e-54	12.2965	0.702	0.536	C0		RRBP1	6238	9.75915e-65	9.27735	0.978	0.877	C1		CFAP410	755	0.00055404	-1.05152	0.316	0.36	C2		PRKCH	5583	3.04026e-52	-1.01413	0.059	0.287	C3
ZFAND1	79752	3.06223e-08	12.2891	0.844	0.734	C0		HNRNPD	3184	0	9.26483	0.996	0.869	C1		TARDBP	23435	8.73779e-06	-1.05221	0.685	0.589	C2		PLEKHG3	26030	1.13037e-52	-1.01439	0.076	0.31	C3
CCDC71L	168455	2.8349e-51	12.2803	0.77	0.616	C0		NONO	4841	0	9.2638	0.998	0.893	C1		CRYZ	1429	3.60901e-08	-1.05349	0.303	0.373	C2		METTL2A	339175	8.61764e-73	-1.01452	0.059	0.344	C3
UBE3C	9690	0.00578947	12.1672	0.831	0.768	C0		POLR2J3	548644	1.16708e-117	9.26012	0.946	0.778	C1		EXOSC9	5393	3.42103e-08	-1.05454	0.559	0.449	C2		NUP210	23225	7.57293e-51	-1.01473	0.068	0.293	C3
EIF3I	8668	2.74458e-05	12.1539	0.991	0.875	C0		NDUFA12	55967	0	9.25476	1	0.929	C1		NCK2	8440	0.000297325	-1.06014	0.441	0.485	C2		ANKRD13C	81573	1.26748e-61	-1.01504	0.087	0.353	C3
DDX60L	91351	8.13104e-05	12.147	0.283	0.244	C0		SP100	6672	1.82513e-79	9.23996	0.719	0.506	C1		HAUS8	93323	1.22471e-16	-1.06244	0.458	0.315	C2		ENO2	2026	6.18105e-46	-1.01571	0.049	0.254	C3
SF1	7536	1.42848e-15	12.1259	0.954	0.855	C0		LAMTOR2	28956	8.04663e-174	9.21191	0.993	0.879	C1		PLEKHA5	54477	0.00113903	-1.06364	0.311	0.347	C2		SIRT6	51548	1.92074e-78	-1.01593	0.043	0.34	C3
RNF113A	7737	0.00354853	12.0558	0.673	0.593	C0		TPRKB	51002	3.78968e-303	9.20638	0.983	0.792	C1		LMBR1	64327	0.00536371	-1.06417	0.559	0.568	C2		BRD1	23774	2.24023e-57	-1.01635	0.086	0.339	C3
IFT20	90410	1.52857e-18	12.0317	0.854	0.737	C0		RNF115	27246	1.38522e-140	9.19283	0.878	0.653	C1		SEC24A	10802	0.00434978	-1.06706	0.406	0.435	C2		C17orf58	284018	9.95913e-52	-1.01642	0.079	0.311	C3
USP53	54532	0.00680165	12.0262	0.314	0.286	C0		PTRHD1	391356	2.55537e-137	9.1691	0.962	0.833	C1		RPRD1B	58490	3.18988e-07	-1.06708	0.443	0.494	C2		TTI1	9675	1.16418e-68	-1.01662	0.043	0.312	C3
AFF4	27125	2.80229e-25	12.0215	0.704	0.578	C0		YRDC	79693	4.42217e-198	9.13606	0.873	0.588	C1		BMP2K	55589	0.00201292	-1.06871	0.214	0.25	C2		DGKD	8527	9.56655e-51	-1.0172	0.069	0.294	C3
DAP	1611	1.91332e-39	11.9965	0.938	0.822	C0		PSMD14	10213	1.82889e-220	9.08369	0.968	0.77	C1		EDEM1	9695	1.25975e-06	-1.07782	0.349	0.406	C2		NDRG2	57447	1.96711e-51	-1.01825	0.053	0.276	C3
JAGN1	84522	3.00366e-24	11.9955	0.845	0.712	C0		HIST2H2AC	8338	1.00295e-240	9.05011	0.456	0.115	C1		NXN	64359	1.18145e-06	-1.07862	0.334	0.39	C2		PCK2	5106	1.10836e-56	-1.01879	0.052	0.291	C3
RPUSD3	285367	2.09526e-13	11.9534	0.651	0.554	C0		PTTG1IP	754	3.4178e-101	9.04841	0.944	0.817	C1		KIAA2013	90231	0.00577681	-1.07883	0.488	0.508	C2		ZNF7	7553	6.85387e-67	-1.01897	0.068	0.341	C3
HIBADH	11112	1.36098e-20	11.949	0.843	0.734	C0		SMC2	10592	0	9.00215	0.948	0.515	C1		TSPAN15	23555	5.9436e-10	-1.08309	0.75	0.639	C2		TRIM52-AS1	100507602	1.88508e-56	-1.02026	0.08	0.329	C3
MIR4435-2HG	541471	2.48429e-29	11.9384	0.496	0.582	C0		GAS2L3	283431	2.96707e-213	8.98767	0.38	0.083	C1		DIAPH2	1730	3.98009e-13	-1.0833	0.285	0.38	C2		DDX19A	55308	1.13764e-70	-1.0203	0.076	0.36	C3
GAS5	60674	3.04056e-87	11.9112	0.984	0.876	C0		EMP1	2012	3.42883e-25	8.97415	0.29	0.18	C1		GJB5	2709	0.000437932	-1.08347	0.327	0.365	C2		ZNF33B	7582	1.8488e-69	-1.02037	0.051	0.329	C3
SC5D	6309	3.18496e-22	11.8947	0.549	0.449	C0		NOC2L	26155	3.62143e-152	8.97007	0.881	0.644	C1		THSD4	79875	1.18007e-18	-1.08357	0.28	0.402	C2		DMTF1	9988	7.25062e-67	-1.02055	0.057	0.326	C3
PSMB10	5699	0.00907726	11.8946	0.462	0.422	C0		LYAR	55646	1.36852e-249	8.94425	0.78	0.402	C1		CREB3	10488	0.00109479	-1.08547	0.476	0.504	C2		BACH1	571	2.1591e-49	-1.02086	0.06	0.278	C3
TRADD	8717	1.18793e-38	11.8731	0.821	0.675	C0		MRPL3	11222	0	8.92782	0.999	0.897	C1		RMI1	80010	8.49195e-05	-1.0859	0.39	0.312	C2		SEC22C	9117	1.00399e-62	-1.02134	0.064	0.324	C3
HM13	81502	1.61989e-26	11.8368	0.992	0.877	C0		ARPC5L	81873	0	8.91693	1	0.917	C1		CDK9	1025	0.00442795	-1.08685	0.537	0.54	C2		CASTOR3	352954	8.24033e-73	-1.02163	0.069	0.359	C3
KDELR3	11015	6.17792e-25	11.8315	0.898	0.786	C0		SYNGR2	9144	1.47075e-108	8.91241	0.958	0.831	C1		P2RX4	5025	2.04327e-05	-1.08827	0.334	0.386	C2		SAMD12	401474	1.59028e-57	-1.02172	0.078	0.327	C3
SAMD9	54809	0.00528635	11.8261	0.32	0.291	C0		CCNF	899	0	8.90707	0.649	0.149	C1		RAB27A	5873	2.78931e-07	-1.08877	0.304	0.373	C2		L3MBTL2	83746	4.07586e-78	-1.02208	0.036	0.329	C3
GSTO1	9446	8.98614e-09	11.8256	0.975	0.873	C0		HDAC1	3065	2.46696e-275	8.9064	0.986	0.832	C1		KNL1	57082	4.75534e-25	-1.08894	0.314	0.179	C2		TXNL4B	54957	1.731e-53	-1.02257	0.045	0.271	C3
LMO7	4008	1.07031e-92	11.8165	0.885	0.762	C0		CD151	977	5.22599e-285	8.89428	0.999	0.91	C1		RGL2	5863	1.02802e-05	-1.09117	0.57	0.602	C2		FARS2	10667	1.59862e-79	-1.02289	0.045	0.345	C3
ERP44	23071	2.77036e-18	11.8162	0.708	0.586	C0		TCEAL8	90843	5.55304e-31	8.88738	0.534	0.385	C1		ACIN1	22985	0.000262664	-1.09233	0.679	0.62	C2		MAP3K2-DT	100506922	2.47542e-44	-1.02289	0.055	0.258	C3
TAF1D	79101	0.000799791	11.816	0.849	0.755	C0		GCAT	23464	4.13045e-161	8.84886	0.896	0.661	C1		USP6NL	9712	0.000678654	-1.09481	0.37	0.41	C2		COG3	83548	7.80129e-59	-1.02314	0.064	0.312	C3
PTS	5805	0.00892982	11.8155	0.965	0.854	C0		STUB1	10273	1.04057e-302	8.84771	1	0.93	C1		RHPN1	114822	5.63597e-12	-1.09802	0.358	0.448	C2		MFSD8	256471	1.24178e-77	-1.02408	0.055	0.354	C3
AP1M2	10053	2.9736e-39	11.8149	0.975	0.837	C0		AP1S1	1174	1.05991e-201	8.8414	0.998	0.905	C1		PHAX	51808	0.00166727	-1.0982	0.675	0.609	C2		TRPM7	54822	5.22092e-63	-1.02524	0.063	0.322	C3
NDUFB8	4714	6.34411e-17	11.8146	0.992	0.92	C0		PRMT1	3276	0	8.83854	0.999	0.899	C1		LPAR2	9170	3.00001e-08	-1.10155	0.42	0.492	C2		ALS2	57679	3.68347e-65	-1.02539	0.058	0.325	C3
PHPT1	29085	1.90512e-10	11.8139	0.995	0.919	C0		NDUFA9	4704	1.12014e-252	8.83732	0.98	0.797	C1		TSR1	55720	0.00376707	-1.10394	0.571	0.509	C2		TRMT5	57570	1.9764e-65	-1.02705	0.084	0.357	C3
SEPHS2	22928	2.52875e-06	11.8003	0.787	0.688	C0		ARF1	375	0	8.83719	1	0.963	C1		PUS10	150962	0.00534569	-1.10509	0.325	0.354	C2		NHLRC2	374354	2.03994e-61	-1.02716	0.064	0.32	C3
C16orf74	404550	4.03518e-07	11.7987	0.942	0.848	C0		AC010642.2		2.33343e-78	8.83716	0.765	0.563	C1		STX4	6810	5.2496e-05	-1.10676	0.515	0.549	C2		PDSS1	23590	6.61072e-55	-1.02723	0.049	0.28	C3
DSP	1832	1.41402e-10	11.745	0.954	0.857	C0		SELENOF	9403	1.8984e-213	8.83372	0.994	0.883	C1		CSGALNACT1	55790	4.96346e-14	-1.10746	0.272	0.377	C2		MBNL3	55796	3.83875e-55	-1.02741	0.072	0.314	C3
AP003498.2		1.69637e-24	11.7419	0.613	0.509	C0		PHTF1	10745	4.29713e-158	8.82947	0.793	0.506	C1		CREBL2	1389	7.7572e-05	-1.10931	0.38	0.426	C2		XPNPEP1	7511	2.50692e-71	-1.02878	0.06	0.343	C3
CPE	1363	6.18416e-16	11.7162	0.445	0.358	C0		PARM1	25849	7.83283e-126	8.81706	0.831	0.597	C1		SERPINH1	871	1.17218e-07	-1.11075	0.651	0.554	C2		MHENCR	100505771	2.47582e-53	-1.02911	0.046	0.272	C3
LYPLA1	10434	9.62486e-08	11.7122	0.953	0.854	C0		TXNDC12	51060	8.92131e-278	8.81206	0.989	0.843	C1		ADIPOR2	79602	1.98178e-05	-1.11213	0.451	0.497	C2		ARMC9	80210	1.40132e-69	-1.02931	0.05	0.325	C3
CREB3L1	90993	5.07349e-67	11.702	0.263	0.108	C0		UBE2N	7334	0	8.81112	0.999	0.874	C1		PLPP1	8611	2.08756e-08	-1.11542	0.244	0.318	C2		GPN2	54707	6.49717e-68	-1.02957	0.053	0.324	C3
TMED4	222068	1.31929e-06	11.6825	0.948	0.852	C0		NIPSNAP2	2631	1.69737e-253	8.81058	0.995	0.897	C1		RRP15	51018	2.57582e-08	-1.12002	0.686	0.575	C2		BORCS6	54785	1.78024e-74	-1.0309	0.039	0.323	C3
KIAA0319L	79932	4.64374e-20	11.668	0.556	0.453	C0		RAB2A	5862	4.5832e-186	8.81038	0.992	0.891	C1		EVI5	7813	2.31714e-06	-1.12035	0.444	0.494	C2		SPG11	80208	1.70145e-65	-1.03096	0.058	0.323	C3
MIR22HG	84981	9.29272e-33	11.6536	0.274	0.163	C0		NUP37	79023	0	8.80284	0.963	0.678	C1		BTBD7	55727	0.000273443	-1.12089	0.447	0.481	C2		THADA	63892	1.67383e-65	-1.031	0.057	0.324	C3
LAPTM4A	9741	1.83732e-13	11.6513	0.989	0.888	C0		MYL6B	140465	6.67206e-146	8.79715	0.9	0.681	C1		TMX1	81542	8.6001e-08	-1.12793	0.854	0.74	C2		NUDT12	83594	2.77379e-79	-1.03192	0.048	0.35	C3
SCAND1	51282	1.08446e-101	11.5868	0.979	0.856	C0		CAPNS1	826	5.98177e-169	8.78964	0.987	0.842	C1		DUSP11	8446	1.67968e-07	-1.12841	0.478	0.528	C2		AFAP1L1	134265	1.3559e-57	-1.03197	0.06	0.304	C3
SPNS2	124976	4.99578e-05	11.5754	0.286	0.247	C0		LMAN2	10960	2.05906e-232	8.78837	1	0.923	C1		PGM3	5238	0.00222917	-1.12933	0.448	0.488	C2		RABL2B	11158	2.85731e-71	-1.03334	0.055	0.338	C3
OSTF1	26578	3.7043e-12	11.5405	0.9	0.772	C0		PSMA6	5687	0	8.77064	0.999	0.938	C1		DENND1B	163486	1.80488e-12	-1.1301	0.308	0.397	C2		NAT10	55226	2.83628e-65	-1.03469	0.074	0.346	C3
ARHGAP5	394	2.70739e-05	11.5171	0.756	0.666	C0		CDT1	81620	0	8.75382	0.826	0.284	C1		PCM1	5108	2.60693e-06	-1.13189	0.642	0.549	C2		TTLL5	23093	4.74488e-65	-1.03507	0.062	0.329	C3
MPZL3	196264	1.85936e-12	11.5031	0.321	0.25	C0		ATP5IF1	93974	2.21818e-276	8.73906	0.999	0.918	C1		JMJD8	339123	0.000164711	-1.13382	0.522	0.546	C2		PEX11G	92960	1.79067e-72	-1.03555	0.049	0.332	C3
PITHD1	57095	2.1156e-22	11.4853	0.589	0.629	C0		ARL2	402	7.86633e-254	8.73349	0.959	0.734	C1		ADGRG6	57211	1.13685e-05	-1.13491	0.312	0.365	C2		MAPK12	6300	2.26983e-64	-1.03576	0.05	0.31	C3
SH3BP4	23677	1.70294e-07	11.4811	0.48	0.513	C0		DUSP6	1848	1.66249e-120	8.73174	0.984	0.883	C1		R3HDM1	23518	3.39732e-06	-1.13666	0.526	0.443	C2		CYP20A1	57404	9.79935e-68	-1.03602	0.052	0.323	C3
NRBF2	29982	1.82483e-26	11.4806	0.622	0.506	C0		C11orf1	64776	3.17389e-81	8.72775	0.773	0.566	C1		CHD1	1105	0.00557733	-1.13767	0.574	0.516	C2		RNF38	152006	1.84528e-57	-1.03633	0.068	0.315	C3
RHOQ	23433	1.27867e-09	11.4712	0.336	0.273	C0		CDK5RAP2	55755	2.11563e-151	8.72632	0.752	0.459	C1		AP1G2	8906	0.00028514	-1.13814	0.487	0.515	C2		NGLY1	55768	1.07068e-59	-1.03637	0.065	0.316	C3
ASB1	51665	0.00732516	11.4439	0.305	0.327	C0		TCOF1	6949	0	8.68532	0.862	0.376	C1		SIPA1L1	26037	6.25098e-11	-1.13902	0.448	0.525	C2		AVEN	57099	1.72853e-59	-1.03647	0.072	0.325	C3
PHLDA3	23612	3.58818e-43	11.328	0.766	0.616	C0		RBM17	84991	0	8.67325	0.982	0.798	C1		VSIG10L	147645	1.74465e-09	-1.1433	0.243	0.323	C2		STK11IP	114790	2.96319e-65	-1.03701	0.065	0.331	C3
LGALS3BP	3959	2.23581e-28	11.2698	0.974	0.847	C0		FAM122B	159090	6.95001e-238	8.66755	0.919	0.658	C1		STIM1	6786	0.00468309	-1.14537	0.391	0.422	C2		ANKZF1	55139	8.2044e-72	-1.0372	0.047	0.327	C3
RTL8C	8933	1.44068e-49	11.267	0.849	0.705	C0		RABL6	55684	0	8.63431	0.967	0.728	C1		ELP4	26610	9.15903e-05	-1.1487	0.443	0.385	C2		MMS19	64210	1.69633e-62	-1.03726	0.067	0.328	C3
LAMP1	3916	3.73403e-52	11.2593	0.98	0.879	C0		C6orf62	81688	4.5678e-106	8.63263	0.928	0.769	C1		NUDT5	11164	0.000411363	-1.14962	0.964	0.868	C2		RAD17	5884	2.4107e-63	-1.0375	0.071	0.335	C3
ZFP36	7538	2.96523e-25	11.2551	0.621	0.504	C0		MIS18BP1	55320	0	8.59209	0.85	0.364	C1		UVRAG	7405	1.05506e-06	-1.15263	0.324	0.39	C2		UBAP1	51271	5.6413e-56	-1.0384	0.077	0.321	C3
TMEM132A	54972	2.29847e-45	11.2372	0.734	0.581	C0		FAM111B	374393	0	8.59149	0.643	0.093	C1		MTSS1	9788	3.95548e-14	-1.15557	0.229	0.33	C2		GLT8D1	55830	1.56882e-78	-1.03895	0.054	0.356	C3
ADI1	55256	0.00120515	11.2179	0.894	0.82	C0		MND1	84057	0	8.59064	0.838	0.175	C1		TOLLIP	54472	0.000307696	-1.15568	0.505	0.53	C2		ANKRD28	23243	9.95384e-55	-1.03936	0.074	0.313	C3
ACADVL	37	1.40511e-41	11.1651	0.924	0.783	C0		FARSB	10056	0	8.55922	0.952	0.66	C1		GOLGA5	9950	0.00021381	-1.15638	0.467	0.512	C2		MAMLD1	10046	7.71997e-47	-1.03946	0.051	0.26	C3
COX20	116228	2.24837e-24	11.0133	0.865	0.839	C0		LIMA1	51474	1.20999e-45	8.54962	0.788	0.637	C1		MEAK7	57707	0.000335107	-1.15875	0.458	0.489	C2		DMWD	1762	3.82856e-65	-1.03951	0.059	0.323	C3
SRP19	6728	0.000192285	11.0064	0.956	0.852	C0		TSPAN1	10103	2.69594e-83	8.54884	0.838	0.644	C1		RALGPS2	55103	6.5564e-05	-1.15974	0.486	0.53	C2		TMEM44	93109	3.42487e-70	-1.03969	0.043	0.317	C3
GMFB	2764	0.000394457	10.9892	0.765	0.683	C0		DNMT1	1786	0	8.54769	0.974	0.634	C1		GLI4	2738	4.95761e-22	-1.15996	0.292	0.429	C2		AFF1	4299	6.0183e-58	-1.04	0.076	0.326	C3
EXPH5	23086	1.52017e-11	10.9182	0.227	0.292	C0		ACBD3	64746	3.38535e-64	8.54289	0.931	0.809	C1		STAP2	55620	1.13376e-05	-1.16348	0.511	0.551	C2		RPUSD2	27079	4.02762e-76	-1.04078	0.039	0.327	C3
GM2A	2760	3.65978e-32	10.8878	0.493	0.372	C0		MMS22L	253714	2.57374e-267	8.52557	0.6	0.192	C1		PKMYT1	9088	1.01985e-08	-1.16469	0.358	0.254	C2		DBT	1629	4.67605e-60	-1.04135	0.085	0.341	C3
BNIP3L	665	6.8938e-49	10.848	0.877	0.73	C0		REV3L	5980	4.60839e-86	8.50943	0.466	0.237	C1		SSX2IP	117178	2.94169e-05	-1.16958	0.374	0.297	C2		PI4K2B	55300	2.53301e-52	-1.04169	0.07	0.302	C3
LONRF2	164832	1.12904e-14	10.8394	0.468	0.382	C0		SP110	3431	9.00915e-61	8.50155	0.611	0.405	C1		DNAJC30	84277	2.3439e-09	-1.17096	0.403	0.475	C2		THOC1	9984	2.9214e-72	-1.04198	0.046	0.327	C3
MYO1D	4642	8.99619e-06	10.8079	0.557	0.504	C0		TFAM	7019	0	8.47074	0.96	0.673	C1		LMF1	64788	1.88131e-10	-1.17189	0.196	0.281	C2		DHX40	79665	3.67346e-53	-1.042	0.097	0.338	C3
CDCP1	64866	0.000410594	10.7958	0.697	0.642	C0		GTF2H1	2965	1.21608e-168	8.46218	0.921	0.72	C1		TCIRG1	10312	8.00012e-10	-1.17312	0.456	0.517	C2		STAT5B	6777	2.32185e-53	-1.04225	0.047	0.274	C3
FOSL1	8061	5.47636e-21	10.6791	0.31	0.398	C0		FKBP3	2287	4.2203e-272	8.45252	0.971	0.767	C1		PHYH	5264	0.00262283	-1.17594	0.438	0.466	C2		SMPD2	6610	9.15829e-73	-1.04249	0.064	0.351	C3
MYO1B	4430	0.00248016	10.6752	0.605	0.597	C0		NFKBIA	4792	8.5631e-54	8.41558	0.844	0.674	C1		WFS1	7466	2.44132e-05	-1.17798	0.431	0.476	C2		TAB3	257397	6.20776e-60	-1.04259	0.063	0.315	C3
NIPAL1	152519	7.68984e-32	10.6688	0.653	0.527	C0		ZNF581	51545	5.53991e-22	8.41251	0.69	0.576	C1		ELMO3	79767	1.26487e-06	-1.17962	0.516	0.56	C2		CHD7	55636	7.49251e-60	-1.04267	0.06	0.311	C3
SPHK1	8877	1.76379e-59	10.6103	0.402	0.542	C0		PRPF38A	84950	1.18642e-265	8.4059	0.954	0.725	C1		POC1A	25886	9.55443e-32	-1.17963	0.549	0.351	C2		BTBD10	84280	8.98925e-64	-1.04333	0.069	0.333	C3
UBE2F	140739	9.24632e-15	10.5585	0.886	0.781	C0		TMEM256	254863	5.35815e-170	8.40337	0.994	0.908	C1		ATAD3A	55210	0.00568904	-1.1818	0.478	0.422	C2		NAB1	4664	3.7563e-54	-1.04342	0.067	0.302	C3
RAB6A	5870	1.70598e-16	10.5575	0.772	0.661	C0		HIST1H1E	3008	0	8.39929	0.558	0.113	C1		TIMM10B	26515	0.000155466	-1.18298	0.448	0.48	C2		SLC7A6OS	84138	2.16549e-62	-1.04346	0.057	0.315	C3
ACAA1	30	4.1848e-48	10.5537	0.832	0.678	C0		XRCC5	7520	0	8.39826	1	0.916	C1		FOXP1	27086	1.10856e-08	-1.18786	0.327	0.402	C2		EIF3J-DT	645212	9.18652e-66	-1.04399	0.069	0.339	C3
ERBB2	2064	1.89775e-137	10.5293	0.764	0.527	C0		HNRNPDL	9987	8.90612e-287	8.38656	0.997	0.914	C1		SIAH1	6477	0.000172087	-1.19244	0.496	0.526	C2		HACD4	401494	5.17814e-59	-1.0446	0.069	0.319	C3
FKBP8	23770	1.52605e-43	10.5259	0.964	0.824	C0		CENPU	79682	0	8.38321	0.908	0.288	C1		BDH1	622	0.000863178	-1.19613	0.432	0.466	C2		WDR41	55255	7.75556e-65	-1.04461	0.06	0.324	C3
UCHL3	7347	0.000661983	10.5082	0.969	0.858	C0		TTK	7272	0	8.36583	0.667	0.158	C1		PRKACB	5567	0.00104392	-1.19641	0.363	0.396	C2		PPTC7	160760	2.52768e-59	-1.04683	0.078	0.333	C3
ADGRE2	30817	6.1263e-61	10.4771	0.289	0.14	C0		ITGB4	3691	1.20004e-77	8.35431	0.642	0.411	C1		IPO9	55705	9.674e-06	-1.19811	0.677	0.584	C2		SNAP23	8773	8.85271e-66	-1.04685	0.096	0.374	C3
REEP5	7905	3.81709e-81	10.4329	0.986	0.891	C0		NIFK	84365	7.28622e-280	8.34867	0.984	0.848	C1		NABP2	79035	6.30607e-05	-1.20359	0.694	0.603	C2		OTUD5	55593	2.97382e-68	-1.04761	0.074	0.353	C3
SLC38A2	54407	6.30723e-11	10.4123	0.851	0.746	C0		UNG	7374	4.76511e-267	8.34626	0.783	0.441	C1		HDHD3	81932	5.30224e-10	-1.2039	0.434	0.51	C2		UTP15	84135	5.92215e-61	-1.048	0.063	0.317	C3
LY6G6C	80740	3.02772e-97	10.4093	0.539	0.319	C0		PXMP2	5827	8.94855e-306	8.34514	0.843	0.461	C1		MED11	400569	0.00898676	-1.20445	0.573	0.572	C2		SYNRG	11276	3.45048e-53	-1.049	0.087	0.326	C3
SAT2	112483	8.81794e-36	10.3876	0.862	0.707	C0		PUF60	22827	0	8.33473	0.998	0.896	C1		BCKDHB	594	7.2783e-07	-1.20491	0.376	0.437	C2		TMEM39B	55116	2.25755e-73	-1.04917	0.051	0.337	C3
CAP1	10487	6.09665e-12	10.387	0.991	0.902	C0		BRCA1	672	0	8.32771	0.886	0.24	C1		RMND5B	64777	0.00292194	-1.20519	0.552	0.564	C2		DCAKD	79877	1.06359e-78	-1.04971	0.052	0.355	C3
LMNA	4000	1.05587e-38	10.3827	0.998	0.93	C0		PSMB8	5696	2.27224e-113	8.32559	0.769	0.517	C1		CPNE8	144402	1.66143e-20	-1.20563	0.314	0.44	C2		GTF2IRD1	9569	6.02186e-58	-1.04979	0.077	0.327	C3
KIAA1522	57648	1.04625e-18	10.375	0.876	0.773	C0		MMAB	326625	3.71399e-195	8.3154	0.974	0.796	C1		FADS3	3995	1.00056e-16	-1.21011	0.328	0.433	C2		PYROXD2	84795	1.04344e-70	-1.05038	0.051	0.329	C3
UQCRQ	27089	0.00157288	10.3733	0.999	0.954	C0		BTG3	10950	0	8.31306	0.806	0.278	C1		MTRES1	51250	0.0044522	-1.21263	0.483	0.503	C2		B4GAT1	11041	5.92116e-64	-1.05207	0.075	0.343	C3
TMA7	51372	8.98057e-08	10.3732	0.995	0.923	C0		FUS	2521	0	8.31182	0.999	0.883	C1		TRABD	80305	2.35996e-06	-1.21355	0.574	0.611	C2		AGBL5	60509	4.71233e-68	-1.05277	0.071	0.349	C3
CSNK1A1	1452	2.424e-24	10.3697	0.997	0.917	C0		LRR1	122769	0	8.29715	0.942	0.487	C1		REEP6	92840	4.98042e-06	-1.21378	0.433	0.483	C2		ANKRD26	22852	7.68786e-61	-1.05306	0.05	0.301	C3
TFPI	7035	1.59257e-29	10.3681	0.583	0.474	C0		ZDHHC4	55146	2.64148e-188	8.28917	0.928	0.702	C1		CASK	8573	1.8788e-07	-1.22083	0.442	0.494	C2		AC006333.2		8.43334e-62	-1.05331	0.063	0.32	C3
IGF2R	3482	1.19501e-06	10.3534	0.674	0.6	C0		FH	2271	0	8.28532	0.98	0.781	C1		SUCLG2	8801	0.00164074	-1.22174	0.687	0.678	C2		SESN1	27244	6.32196e-63	-1.05416	0.052	0.31	C3
SYNGR1	9145	3.86771e-35	10.3452	0.926	0.809	C0		XRCC2	7516	0	8.2759	0.604	0.161	C1		KRCC1	51315	0.00542596	-1.22293	0.502	0.527	C2		RFFL	117584	1.75864e-65	-1.05437	0.05	0.314	C3
MANF	7873	1.7991e-11	10.3436	0.797	0.706	C0		TACC3	10460	0	8.27191	0.81	0.219	C1		ANAPC15	25906	1.49112e-05	-1.22376	0.94	0.844	C2		CASTOR1	652968	6.83021e-49	-1.05519	0.048	0.262	C3
DNAJC5	80331	5.33582e-09	10.3187	0.702	0.624	C0		SMCHD1	23347	1.31764e-244	8.24929	0.79	0.423	C1		WDR45	11152	1.64658e-06	-1.2241	0.311	0.374	C2		MPP5	64398	3.5336e-59	-1.05572	0.098	0.358	C3
CCNB1IP1	57820	0.00838978	10.296	0.655	0.627	C0		LIG1	3978	0	8.24121	0.877	0.347	C1		GRTP1	79774	0.000196681	-1.22422	0.455	0.497	C2		MLH1	4292	6.14365e-73	-1.05593	0.052	0.336	C3
EPHB6	2051	0.000120085	10.2502	0.331	0.294	C0		OPN3	23596	4.50695e-88	8.23457	0.913	0.754	C1		SLC66A3	130814	2.99635e-07	-1.2267	0.492	0.541	C2		ZNF487	642819	6.73952e-62	-1.05673	0.064	0.321	C3
DNAJA1	3301	1.29541e-16	10.2434	0.971	0.877	C0		ESD	2098	5.33008e-274	8.22186	0.983	0.788	C1		SHLD1	149840	0.000266165	-1.22733	0.339	0.383	C2		BMP1	649	8.26829e-67	-1.05681	0.04	0.305	C3
MED31	51003	1.05556e-10	10.2159	0.921	0.784	C0		TXN2	25828	4.94254e-290	8.19604	0.997	0.896	C1		TTC39A	22996	4.46848e-05	-1.22945	0.492	0.524	C2		TRAPPC10	7109	1.71121e-65	-1.05871	0.077	0.35	C3
RNF11	26994	2.63901e-28	10.1949	0.882	0.754	C0		NEURL1B	54492	0	8.19472	0.614	0.13	C1		C2orf68	388969	0.00157473	-1.22989	0.46	0.484	C2		OPA3	80207	1.29353e-71	-1.05931	0.064	0.349	C3
ZDHHC9	51114	7.22373e-17	10.1913	0.811	0.71	C0		KIF18A	81930	6.62238e-303	8.19287	0.504	0.11	C1		DOCK9	23348	5.07272e-13	-1.23289	0.368	0.463	C2		MAK16	84549	2.9533e-53	-1.05959	0.062	0.293	C3
GOLGB1	2804	4.48913e-43	10.1899	0.886	0.764	C0		POPDC3	64208	4.87825e-89	8.18417	0.389	0.169	C1		COQ2	27235	0.00581276	-1.23719	0.582	0.508	C2		ADCY6	112	2.41561e-57	-1.05988	0.067	0.312	C3
DNAJC2	27000	1.57974e-18	10.1665	0.798	0.77	C0		RUVBL2	10856	3.47141e-220	8.17964	0.905	0.649	C1		HYLS1	219844	0.000170359	-1.23755	0.243	0.282	C2		OGFOD2	79676	9.2464e-60	-1.05999	0.059	0.307	C3
TANK	10010	1.65369e-50	10.1481	0.694	0.538	C0		GPSM2	29899	1.14149e-288	8.17576	0.788	0.406	C1		NUP188	23511	6.14438e-05	-1.23834	0.462	0.382	C2		DNAJC24	120526	1.15537e-74	-1.06073	0.073	0.368	C3
HCFC1R1	54985	2.98894e-11	10.138	0.886	0.783	C0		TUSC3	7991	4.50969e-232	8.1577	0.984	0.829	C1		STX12	23673	5.32891e-06	-1.24031	0.423	0.477	C2		FNIP2	57600	1.0964e-48	-1.06083	0.049	0.262	C3
C11orf24	53838	3.52112e-09	10.1217	0.533	0.568	C0		PTPMT1	114971	4.5621e-308	8.15755	0.974	0.782	C1		GSR	2936	1.88357e-12	-1.24365	0.741	0.617	C2		FARP2	9855	2.53389e-66	-1.06142	0.066	0.337	C3
AC004130.2		1.06772e-14	10.1145	0.377	0.295	C0		SEPHS1	22929	0	8.14822	0.963	0.729	C1		SPNS1	83985	0.00611823	-1.24379	0.552	0.573	C2		TMEM39A	55254	1.49626e-67	-1.06269	0.067	0.34	C3
IARS	3376	1.31006e-13	10.109	0.605	0.62	C0		CALM3	808	9.69531e-301	8.1431	0.993	0.849	C1		ALG2	85365	0.00462276	-1.24404	0.5	0.529	C2		DNAJC17	55192	2.11787e-76	-1.06306	0.052	0.347	C3
CPD	1362	2.67541e-35	10.0543	0.718	0.586	C0		IMMT	10989	2.84683e-277	8.13483	0.956	0.735	C1		RILP	83547	8.28967e-07	-1.24571	0.29	0.357	C2		DHX57	90957	1.94896e-56	-1.06348	0.084	0.331	C3
TNFRSF1A	7132	1.16234e-29	10.017	0.916	0.77	C0		MRPL23	6150	3.6752e-156	8.11939	0.887	0.668	C1		SOX13	9580	0.00816705	-1.24908	0.532	0.555	C2		DEXI	28955	1.01111e-69	-1.06375	0.052	0.328	C3
LIPG	9388	7.52621e-14	9.98308	0.468	0.394	C0		SRPK1	6732	1.45735e-230	8.11498	0.961	0.774	C1		PIAS3	10401	1.00261e-05	-1.24966	0.442	0.485	C2		TTC8	123016	5.85764e-75	-1.06376	0.057	0.348	C3
OGDH	4967	6.37859e-22	9.95725	0.766	0.667	C0		PXMP4	11264	4.81152e-141	8.11002	0.944	0.751	C1		GFPT2	9945	7.59118e-07	-1.25124	0.195	0.257	C2		DXO	1797	1.29801e-79	-1.0641	0.044	0.345	C3
NTN4	59277	4.44129e-15	9.94376	0.259	0.186	C0		CIAO2A	84191	1.03979e-287	8.08762	0.923	0.637	C1		MSH2	4436	0.0056006	-1.25136	0.532	0.463	C2		PXYLP1	92370	9.85276e-53	-1.06428	0.048	0.273	C3
COPA	1314	2.19054e-20	9.93974	0.814	0.693	C0		FANCI	55215	0	8.06807	0.874	0.289	C1		CCNL2	81669	1.19714e-08	-1.2572	0.412	0.475	C2		TEX9	374618	1.78632e-48	-1.06438	0.046	0.258	C3
LGMN	5641	3.86327e-13	9.92192	0.64	0.55	C0		ATRX	546	1.56223e-173	8.06584	0.947	0.759	C1		BRD3	8019	0.00341906	-1.25969	0.49	0.52	C2		TGFBR2	7048	3.5575e-48	-1.06475	0.058	0.272	C3
GARS-DT	401320	0.0020528	9.87614	0.371	0.333	C0		CHCHD1	118487	2.10547e-267	8.05908	0.991	0.857	C1		MFSD3	113655	1.69496e-05	-1.26237	0.332	0.39	C2		AL049840.5		4.10547e-54	-1.06523	0.051	0.282	C3
MINCR	100507316	0.000909051	9.83849	0.291	0.254	C0		MCM5	4174	0	8.04933	0.811	0.275	C1		C19orf25	148223	5.7471e-05	-1.26351	0.597	0.513	C2		GNPTG	84572	1.48446e-73	-1.06528	0.069	0.36	C3
PDZD11	51248	5.53463e-07	9.83128	0.94	0.837	C0		CAPZB	832	2.72068e-188	8.03635	0.989	0.851	C1		RNF216	54476	8.90611e-06	-1.26872	0.551	0.583	C2		TTLL12	23170	3.77475e-54	-1.06597	0.079	0.318	C3
UPF3B	65109	1.82886e-37	9.78075	0.599	0.653	C0		ARCN1	372	2.8481e-52	8.03356	0.76	0.599	C1		TMEM267	64417	0.00402115	-1.26964	0.49	0.517	C2		MLLT1	4298	1.37043e-63	-1.06601	0.07	0.333	C3
SRSF6	6431	4.36231e-11	9.77573	0.832	0.778	C0		DRG1	4733	1.51639e-235	8.03197	0.933	0.704	C1		RASSF7	8045	0.00388378	-1.27296	0.483	0.427	C2		ARMH3	79591	1.39418e-63	-1.06893	0.068	0.331	C3
CKAP4	10970	0.00275449	9.77313	0.656	0.605	C0		CHID1	66005	1.29635e-119	8.02757	0.919	0.735	C1		PSMC3IP	29893	5.56795e-13	-1.27737	0.326	0.217	C2		ZNF335	63925	4.35665e-70	-1.06903	0.058	0.336	C3
C1orf122	127687	7.42618e-18	9.76643	0.957	0.832	C0		ANTKMT	65990	4.51296e-183	8.0146	0.973	0.824	C1		FIGNL1	63979	8.97696e-15	-1.2783	0.476	0.342	C2		GLB1L2	89944	8.21699e-62	-1.06937	0.07	0.329	C3
LPCAT3	10162	1.44929e-26	9.76628	0.683	0.575	C0		DDB1	1642	4.19735e-113	8.00965	0.878	0.693	C1		GALNS	2588	9.4741e-08	-1.28109	0.49	0.538	C2		RELB	5971	1.27196e-58	-1.06945	0.045	0.287	C3
MTLN	205251	2.66933e-06	9.76169	0.935	0.839	C0		GOLGA4	2803	3.00302e-89	8.00768	0.868	0.705	C1		SEPTIN8	23176	0.000261069	-1.28424	0.327	0.37	C2		PRIM2	5558	6.69627e-58	-1.06949	0.043	0.282	C3
THBS1	7057	6.9635e-35	9.74668	0.143	0.258	C0		OSTM1	28962	1.23915e-36	7.99443	0.481	0.326	C1		UTP25	27042	0.000565934	-1.29206	0.349	0.298	C2		NSUN3	63899	1.14508e-71	-1.07063	0.058	0.34	C3
INTS13	55726	2.64435e-11	9.71621	0.524	0.571	C0		HIST1H1B	3009	0	7.98848	0.433	0.033	C1		SFT2D2	375035	6.29467e-05	-1.29206	0.652	0.576	C2		EMC1	23065	2.83995e-76	-1.07104	0.08	0.38	C3
DNAJB2	3300	3.29034e-28	9.66901	0.521	0.391	C0		MRPS34	65993	0	7.97418	0.999	0.902	C1		CORO2A	7464	2.93995e-10	-1.29565	0.269	0.35	C2		SCRN2	90507	1.21908e-57	-1.07126	0.075	0.322	C3
FNDC3B	64778	3.51164e-29	9.66568	0.769	0.642	C0		ARHGAP11A	9824	0	7.97267	0.598	0.119	C1		SPRED1	161742	1.09883e-06	-1.29652	0.392	0.452	C2		ARL13B	200894	2.38311e-52	-1.07141	0.049	0.273	C3
OVOL1	5017	9.89867e-16	9.60795	0.406	0.321	C0		PRKAR2B	5577	3.54157e-83	7.96963	0.934	0.775	C1		WDR13	64743	7.9859e-09	-1.29819	0.398	0.47	C2		SLC37A4	2542	1.61951e-65	-1.07152	0.068	0.338	C3
SSR1	6745	1.40346e-29	9.56439	0.951	0.839	C0		TRIP13	9319	0	7.96716	0.912	0.278	C1		KCNMB4	27345	2.90749e-06	-1.29841	0.326	0.381	C2		PDE12	201626	3.79426e-69	-1.07159	0.059	0.336	C3
AC093323.1		1.43281e-13	9.55652	0.247	0.317	C0		CLNS1A	1207	3.53751e-275	7.92109	0.986	0.841	C1		FLOT2	2319	7.79385e-08	-1.30132	0.43	0.49	C2		CHCHD4	131474	2.53694e-60	-1.07224	0.087	0.346	C3
HINT2	84681	3.71723e-10	9.53849	0.772	0.745	C0		IMMP1L	196294	0	7.92056	0.954	0.659	C1		SMNDC1	10285	0.00894067	-1.305	0.613	0.551	C2		KHDC4	22889	6.58313e-67	-1.07237	0.049	0.317	C3
PSMB7	5695	8.28094e-10	9.4934	0.995	0.883	C0		CD99	4267	1.30746e-218	7.89501	0.999	0.936	C1		MVP	9961	1.04213e-10	-1.30621	0.485	0.558	C2		GEMIN4	50628	5.37283e-62	-1.07371	0.066	0.323	C3
SOX15	6665	7.08881e-10	9.49178	0.738	0.731	C0		RTF1	23168	2.78937e-238	7.8918	0.941	0.733	C1		MAP3K7	6885	0.00688275	-1.30709	0.45	0.475	C2		MEN1	4221	5.50669e-74	-1.07449	0.076	0.37	C3
MFSD6	54842	1.92066e-12	9.49147	0.581	0.501	C0		TAZ	6901	2.06337e-156	7.88398	0.754	0.456	C1		CBLB	868	0.00555165	-1.3071	0.371	0.403	C2		PDE8A	5151	4.15622e-63	-1.07471	0.076	0.341	C3
SCO2	9997	2.5634e-17	9.42199	0.748	0.622	C0		IER3IP1	51124	6.20238e-306	7.87352	0.996	0.87	C1		NCAPH2	29781	5.13288e-11	-1.30909	0.586	0.446	C2		INAFM1	255783	5.96582e-63	-1.07471	0.057	0.315	C3
TMBIM4	51643	9.31886e-53	9.40548	0.977	0.867	C0		BAZ1B	9031	0	7.86906	0.939	0.631	C1		GAB1	2549	1.20053e-08	-1.31131	0.247	0.32	C2		MICU1	10367	9.39629e-70	-1.0753	0.082	0.367	C3
EIF3F	8665	9.91999e-37	9.37471	0.993	0.907	C0		BOD1	91272	8.42613e-203	7.84509	0.931	0.698	C1		GBA	2629	1.17567e-08	-1.31168	0.399	0.468	C2		PRKD2	25865	6.02253e-54	-1.07552	0.069	0.303	C3
TMBIM6	7009	1.60539e-13	9.37326	0.999	0.948	C0		NDUFAF6	137682	6.67864e-289	7.84246	0.965	0.726	C1		PARL	55486	0.00523008	-1.31293	0.842	0.771	C2		VPS53	55275	3.50125e-62	-1.0758	0.097	0.362	C3
TAF10	6881	2.31076e-13	9.3704	0.942	0.82	C0		DNAJB11	51726	1.01562e-247	7.83588	0.983	0.822	C1		ALKBH6	84964	4.81589e-08	-1.31323	0.358	0.431	C2		FBXL17	64839	3.18443e-56	-1.07633	0.075	0.318	C3
PPP1R11	6992	0.00389956	9.36882	0.672	0.611	C0		MYCBP	26292	4.88317e-239	7.82354	0.962	0.776	C1		ARHGAP8	23779	4.43133e-13	-1.31487	0.466	0.553	C2		LEPR	3953	8.67628e-56	-1.07639	0.051	0.288	C3
SEPTIN9	10801	1.18973e-31	9.33053	0.929	0.836	C0		MRPS7	51081	7.68917e-230	7.82334	0.969	0.777	C1		CASP8AP2	9994	0.000306125	-1.31817	0.435	0.376	C2		LY6E-DT	100133669	6.63679e-47	-1.07645	0.045	0.251	C3
TMEM14C	51522	0.000720227	9.20149	0.993	0.907	C0		KIF5B	3799	1.44893e-270	7.79987	0.996	0.876	C1		SIL1	64374	1.5938e-14	-1.32149	0.417	0.507	C2		MTFR1	9650	1.03135e-55	-1.07646	0.062	0.3	C3
PSMD12	5718	1.31534e-05	9.20081	0.855	0.789	C0		GPI	2821	2.70687e-197	7.77752	0.992	0.86	C1		SLC22A31	146429	1.90807e-13	-1.32409	0.178	0.269	C2		TASP1	55617	9.24707e-72	-1.07647	0.058	0.34	C3
SLC27A2	11001	7.86919e-20	9.18653	0.497	0.405	C0		NUDT16	131870	2.32695e-45	7.76048	0.791	0.633	C1		LAMTOR3	8649	7.80573e-06	-1.32492	0.569	0.598	C2		PUS7	54517	1.89451e-50	-1.07652	0.085	0.315	C3
PDXDC1	23042	0.00013817	9.18415	0.691	0.619	C0		C15orf61	145853	2.44629e-177	7.75309	0.816	0.523	C1		HES6	55502	0.000264678	-1.32625	0.39	0.33	C2		UBTD1	80019	1.42244e-56	-1.07669	0.053	0.292	C3
TES	26136	1.56267e-08	9.16257	0.577	0.613	C0		CCNE2	9134	0	7.75237	0.681	0.157	C1		SASH1	23328	0.00208017	-1.32901	0.318	0.359	C2		ZSWIM8	23053	3.27372e-68	-1.07686	0.069	0.345	C3
EIF2S2	8894	1.58183e-09	9.15075	0.997	0.915	C0		HIP1R	9026	2.63708e-31	7.75235	0.326	0.198	C1		NT5DC2	64943	6.56882e-05	-1.32989	0.488	0.406	C2		ELP1	8518	7.74894e-64	-1.07764	0.066	0.329	C3
PNP	4860	0.000148015	9.12613	0.793	0.744	C0		MRPL17	63875	0	7.7519	0.996	0.832	C1		BRMS1	25855	7.52076e-05	-1.3341	0.837	0.749	C2		GGA2	23062	6.17014e-63	-1.08048	0.091	0.358	C3
GTPBP1	9567	3.99605e-05	9.11992	0.388	0.422	C0		C1orf35	79169	0	7.74591	0.996	0.828	C1		TUT4	23318	0.00211915	-1.33438	0.522	0.465	C2		SMAD4	4089	1.48296e-68	-1.08218	0.075	0.354	C3
RNF19A	25897	0.000705942	9.10929	0.526	0.48	C0		ERI3	79033	1.04419e-240	7.74586	0.944	0.696	C1		USP9X	8239	0.0035076	-1.33554	0.53	0.547	C2		DUS3L	56931	7.76847e-69	-1.08266	0.049	0.322	C3
DRAM2	128338	7.29244e-11	9.06108	0.83	0.727	C0		RPP40	10799	6.24025e-122	7.74251	0.795	0.541	C1		METTL27	155368	6.43702e-05	-1.33879	0.217	0.266	C2		PRXL2C	195827	2.68679e-54	-1.08304	0.071	0.308	C3
EPS8L1	54869	1.22479e-97	9.04209	0.589	0.357	C0		TRAPPC4	51399	3.15278e-225	7.72336	0.929	0.654	C1		TARBP1	6894	0.000545767	-1.34019	0.54	0.56	C2		FBXO33	254170	3.1996e-67	-1.08361	0.075	0.352	C3
COL6A1	1291	1.77248e-18	8.97051	0.314	0.228	C0		ADH5	128	2.42271e-150	7.71898	0.896	0.665	C1		SHANK2	22941	2.54698e-17	-1.34111	0.305	0.426	C2		TNFRSF18	8784	4.77148e-65	-1.08365	0.041	0.3	C3
CMAS	55907	1.19954e-24	8.93755	0.954	0.853	C0		MRPL27	51264	0	7.69682	0.99	0.832	C1		CDK17	5128	2.35213e-11	-1.34413	0.247	0.336	C2		ZNF280D	54816	6.30987e-72	-1.08376	0.059	0.342	C3
TMEM134	80194	6.65064e-86	8.93528	0.98	0.863	C0		TMOD3	29766	3.72297e-199	7.69451	0.957	0.788	C1		FAM20C	56975	3.12934e-06	-1.34537	0.291	0.35	C2		ZNF394	84124	5.26671e-82	-1.08399	0.059	0.37	C3
IER5	51278	4.11673e-07	8.93262	0.704	0.633	C0		MLH3	27030	4.54722e-95	7.66058	0.655	0.403	C1		TM2D3	80213	9.37114e-06	-1.34855	0.502	0.539	C2		TUBE1	51175	2.09547e-52	-1.08544	0.045	0.267	C3
RNASEK	440400	2.98916e-25	8.93187	0.998	0.942	C0		CELF1	10658	3.98454e-236	7.65429	0.972	0.802	C1		SLC33A1	9197	0.00233957	-1.34917	0.44	0.464	C2		PRH1	5554	3.73727e-73	-1.08755	0.039	0.32	C3
BASP1	10409	0.000114148	8.93058	0.547	0.506	C0		COA1	55744	1.38063e-304	7.65352	0.987	0.829	C1		PDCD2L	84306	0.00192046	-1.34945	0.521	0.458	C2		COG5	10466	1.16136e-66	-1.08767	0.071	0.344	C3
JUNB	3726	6.72318e-95	8.93058	0.966	0.823	C0		TOMM5	401505	0	7.64273	0.999	0.877	C1		RMI2	116028	2.76692e-10	-1.35097	0.317	0.228	C2		EVA1B	55194	1.02676e-65	-1.0886	0.051	0.315	C3
CD24	100133941	1.09251e-56	8.93058	0.983	0.902	C0		IGSF3	3321	5.70791e-193	7.62165	0.921	0.688	C1		TSPAN5	10098	6.1451e-10	-1.3535	0.33	0.411	C2		TMEM186	25880	6.71476e-80	-1.08884	0.055	0.36	C3
EIF3K	27335	0.000948736	8.9299	0.996	0.941	C0		PIR	8544	4.51417e-247	7.61706	0.964	0.784	C1		PPP6R2	9701	0.00231158	-1.36367	0.495	0.517	C2		ANKRD46	157567	4.0366e-91	-1.08885	0.097	0.437	C3
SHMT2	6472	1.82295e-22	8.9293	0.731	0.724	C0		SCP2	6342	3.19739e-166	7.61473	0.998	0.902	C1		PEX19	5824	0.000764902	-1.36478	0.458	0.482	C2		ZBED5	58486	1.93701e-58	-1.08895	0.063	0.311	C3
STK17A	9263	9.13304e-07	8.91996	0.676	0.619	C0		CENPH	64946	0	7.60851	0.931	0.413	C1		SMIM30	401397	0.000205797	-1.36666	0.477	0.513	C2		DTNBP1	84062	5.66892e-78	-1.08898	0.063	0.365	C3
MMP24OS	101410538	1.36588e-100	8.91692	0.948	0.816	C0		XPO1	7514	0	7.60328	0.99	0.792	C1		SYVN1	84447	0.000241668	-1.36693	0.531	0.562	C2		ZNHIT6	54680	1.23781e-59	-1.08904	0.083	0.34	C3
UBE2H	7328	3.58704e-31	8.91395	0.962	0.851	C0		EMC9	51016	1.19861e-280	7.59089	0.939	0.684	C1		CHM	1121	5.08665e-13	-1.36794	0.345	0.434	C2		EXOC8	149371	7.98443e-69	-1.08916	0.053	0.327	C3
MBNL2	10150	2.22198e-35	8.90435	0.618	0.482	C0		MTIF2	4528	1.48086e-123	7.58579	0.854	0.657	C1		MCMBP	79892	1.10931e-05	-1.36808	0.521	0.438	C2		ZNF518A	9849	2.81189e-63	-1.09078	0.074	0.339	C3
RNF7	9616	5.93497e-15	8.90369	0.991	0.898	C0		MESP1	55897	6.98985e-189	7.57795	0.773	0.446	C1		BET1L	51272	5.71966e-05	-1.37188	0.374	0.427	C2		COQ8A	56997	8.20765e-66	-1.09085	0.064	0.333	C3
PSMD11	5717	6.21546e-08	8.89885	0.963	0.865	C0		ITGB1	3688	0	7.57719	0.998	0.894	C1		SNRNP40	9410	5.62792e-11	-1.37261	0.651	0.526	C2		CAGE1	285782	1.23559e-61	-1.09114	0.078	0.339	C3
IK	3550	0.00103567	8.89145	0.929	0.83	C0		NCCRP1	342897	1.67916e-13	7.57678	0.349	0.26	C1		DCK	1633	0.000185705	-1.37321	0.349	0.281	C2		FAAP100	80233	3.82812e-71	-1.09158	0.06	0.342	C3
MCFD2	90411	1.50548e-07	8.87799	0.949	0.826	C0		MTFR2	113115	0	7.57569	0.702	0.11	C1		PLPPR2	64748	1.04749e-08	-1.37368	0.676	0.68	C2		SLC25A12	8604	1.03796e-76	-1.09204	0.055	0.351	C3
CD68	968	4.62113e-16	8.87311	0.687	0.58	C0		LSM14A	26065	6.82498e-224	7.57566	0.972	0.79	C1		DGAT1	8694	8.58999e-05	-1.37423	0.417	0.461	C2		SPAST	6683	1.4875e-71	-1.09215	0.082	0.372	C3
OSBPL6	114880	9.71004e-17	8.87253	0.39	0.308	C0		MAL	4118	1.58977e-201	7.57006	0.994	0.911	C1		ICA1	3382	5.47851e-08	-1.38111	0.414	0.478	C2		RBM4B	83759	2.07971e-72	-1.09231	0.076	0.366	C3
CCDC186	55088	1.24838e-30	8.86602	0.563	0.439	C0		NUBP2	10101	2.28597e-306	7.56713	0.977	0.764	C1		DLG5	9231	0.00139775	-1.38246	0.444	0.48	C2		ZER1	10444	6.8506e-66	-1.09288	0.069	0.338	C3
LEPROT	54741	1.72556e-10	8.85901	0.818	0.721	C0		COA3	28958	1.00767e-244	7.56346	0.99	0.857	C1		PLEKHA1	59338	1.96913e-06	-1.38331	0.406	0.462	C2		MICA	100507436	1.35008e-62	-1.09385	0.058	0.315	C3
PYGB	5834	1.81534e-06	8.85537	0.626	0.573	C0		RRP36	88745	3.03037e-285	7.55085	0.989	0.795	C1		JMY	133746	1.02125e-07	-1.3872	0.257	0.322	C2		DSTYK	25778	7.36008e-61	-1.09394	0.068	0.325	C3
GPR137B	7107	9.45446e-06	8.82125	0.308	0.259	C0		ORMDL1	94101	5.07858e-288	7.53187	0.937	0.669	C1		MRPS5	64969	0.000964983	-1.39035	0.932	0.833	C2		OSBPL3	26031	9.69125e-48	-1.09492	0.061	0.275	C3
MGME1	92667	3.48671e-62	8.79599	0.538	0.638	C0		MAPRE2	10982	4.5489e-39	7.49869	0.366	0.22	C1		HAGHL	84264	2.50602e-12	-1.3906	0.442	0.528	C2		ABCC1	4363	8.52322e-57	-1.09514	0.051	0.29	C3
KPNA4	3840	9.83162e-06	8.78621	0.756	0.726	C0		BCL2L12	83596	0	7.49256	0.977	0.649	C1		RAPGEF5	9771	4.97855e-10	-1.39095	0.349	0.427	C2		C1RL	51279	5.67682e-61	-1.09526	0.064	0.318	C3
LSS	4047	6.40127e-15	8.76819	0.339	0.261	C0		CLPP	8192	3.30897e-281	7.49096	0.971	0.777	C1		AGAP1	116987	0.00266872	-1.3942	0.534	0.554	C2		ORC5	5001	2.03405e-72	-1.09541	0.08	0.373	C3
ZFPM2-AS1	102723356	8.19494e-07	8.76409	0.319	0.266	C0		NUDT1	4521	0	7.48893	0.997	0.853	C1		SNX13	23161	0.0093914	-1.39978	0.485	0.511	C2		AC093157.1		7.14286e-63	-1.09687	0.074	0.337	C3
PGP	283871	3.2365e-45	8.73944	0.927	0.852	C0		DSCC1	79075	0	7.48881	0.825	0.178	C1		PWP1	11137	1.75596e-05	-1.40705	0.83	0.736	C2		RTL6	84247	4.25971e-62	-1.09704	0.062	0.32	C3
OPTN	10133	8.23739e-53	8.73868	0.759	0.615	C0		UQCR10	29796	0	7.47354	0.999	0.954	C1		AASDHPPT	60496	2.63895e-05	-1.41264	0.654	0.568	C2		GPATCH11	253635	8.5428e-57	-1.09728	0.066	0.308	C3
RSRP1	57035	3.06538e-10	8.72425	0.436	0.358	C0		SUZ12	23512	0	7.47143	0.918	0.583	C1		WNT11	7481	1.64861e-20	-1.41279	0.14	0.258	C2		AMMECR1L	83607	1.2438e-40	-1.09734	0.069	0.263	C3
GALNT1	2589	5.53341e-31	8.70226	0.875	0.767	C0		CAVIN1	284119	4.23004e-67	7.44622	0.749	0.557	C1		TTLL4	9654	3.72712e-05	-1.4136	0.39	0.436	C2		TRMO	51531	2.59599e-73	-1.0977	0.077	0.369	C3
STK24	8428	0.00204662	8.68797	0.704	0.684	C0		DAXX	1616	3.12668e-158	7.44602	0.843	0.583	C1		MOB3C	148932	1.06914e-07	-1.4142	0.311	0.377	C2		DCAF1	9730	1.33215e-57	-1.0978	0.057	0.3	C3
SIRT7	51547	3.47361e-12	8.67593	0.881	0.754	C0		PAK2	5062	1.21354e-236	7.44018	0.945	0.743	C1		SPSB3	90864	0.00761249	-1.4175	0.577	0.584	C2		STK11	6794	1.27364e-72	-1.09797	0.06	0.345	C3
PPFIA1	8500	4.60595e-09	8.61435	0.847	0.763	C0		RAD1	5810	0	7.42619	0.986	0.716	C1		BCCIP	56647	1.15068e-06	-1.41771	0.691	0.608	C2		LTBP4	8425	1.39015e-62	-1.0983	0.068	0.328	C3
PPP1R2	5504	5.85125e-18	8.61358	0.85	0.738	C0		MMADHC	27249	5.03462e-186	7.40894	0.987	0.866	C1		SUSD4	55061	0.000101284	-1.41806	0.369	0.419	C2		ERICH1	157697	5.93832e-69	-1.10072	0.081	0.364	C3
MRGBP	55257	3.7087e-13	8.55889	0.88	0.801	C0		SRXN1	140809	3.50278e-284	7.40866	0.969	0.782	C1		GART	2618	0.000489447	-1.419	0.542	0.482	C2		E4F1	1877	5.55954e-75	-1.10078	0.051	0.341	C3
TRMT6	51605	2.18959e-44	8.53805	0.734	0.753	C0		FBL	2091	0	7.39449	0.984	0.75	C1		MRPL38	64978	0.000339136	-1.42327	0.814	0.72	C2		MED23	9439	2.25683e-75	-1.10118	0.055	0.348	C3
SCML1	6322	1.05594e-22	8.53769	0.255	0.354	C0		YWHAE	7531	0	7.39447	1	0.962	C1		COQ10B	80219	0.000255557	-1.43062	0.807	0.788	C2		ABCB7	22	7.53565e-77	-1.1027	0.051	0.346	C3
PGLS	25796	4.35926e-67	8.51826	0.993	0.908	C0		FASN	2194	4.06282e-70	7.39438	0.976	0.875	C1		CHRAC1	54108	0.000413056	-1.43179	0.725	0.641	C2		RRNAD1	51093	1.90035e-67	-1.10276	0.065	0.338	C3
ELOB	6923	1.32719e-21	8.48964	1	0.943	C0		HMGN1	3150	0	7.39429	1	0.93	C1		TMEM131	23505	6.0356e-06	-1.43498	0.43	0.472	C2		BPNT1	10380	8.07224e-80	-1.10279	0.064	0.37	C3
STAT1	6772	1.82476e-05	8.48786	0.785	0.703	C0		TMEM11	8834	9.05068e-302	7.39382	0.951	0.711	C1		PPP2R3A	5523	1.6231e-07	-1.43926	0.477	0.533	C2		MBD6	114785	6.93239e-71	-1.10314	0.068	0.353	C3
VAT1	10493	1.40788e-46	8.47964	0.792	0.668	C0		CLN3	1201	1.06317e-139	7.38742	0.99	0.865	C1		DIS3L2	129563	6.85656e-05	-1.44504	0.283	0.328	C2		POLB	5423	1.74216e-68	-1.1034	0.086	0.371	C3
COX8A	1351	2.78911e-09	8.47756	1	0.959	C0		UPK3BL1	100134938	4.81505e-117	7.38067	0.915	0.719	C1		N4BP1	9683	0.000233375	-1.44664	0.658	0.657	C2		SRCIN1	80725	3.77485e-55	-1.10347	0.059	0.295	C3
KRR1	11103	1.22007e-08	8.47409	0.715	0.69	C0		APRT	353	1.02976e-263	7.37768	1	0.953	C1		GNG12	55970	0.000726666	-1.45129	0.425	0.458	C2		GPT2	84706	2.67336e-61	-1.10355	0.066	0.324	C3
RPL39L	116832	1.5751e-211	8.41983	0.839	0.851	C0		HMOX2	3163	8.77801e-142	7.37727	0.912	0.709	C1		NFE2L3	9603	0.000737686	-1.45331	0.395	0.423	C2		ARSA	410	7.4382e-65	-1.10391	0.048	0.309	C3
SNX17	9784	3.48768e-06	8.41484	0.847	0.741	C0		GCSH	2653	1.66874e-271	7.37579	0.999	0.882	C1		RAB5A	5868	0.00759116	-1.45339	0.488	0.513	C2		FAM83B	222584	5.02055e-69	-1.10404	0.05	0.323	C3
NCOA4	8031	5.91664e-32	8.39707	0.937	0.824	C0		PPP1R35	221908	4.8199e-224	7.37437	0.978	0.838	C1		CCDC107	203260	2.15729e-07	-1.4564	0.412	0.47	C2		SRR	63826	3.62454e-66	-1.10448	0.053	0.319	C3
MFSD14A	64645	7.19212e-05	8.38203	0.472	0.417	C0		TST	7263	1.08625e-84	7.36971	0.987	0.854	C1		HNRNPK	3190	6.69461e-05	-1.45674	0.997	0.949	C2		DUSP28	285193	2.25961e-68	-1.10488	0.064	0.339	C3
GK5	256356	2.91778e-49	8.36882	0.611	0.467	C0		DBNDD2	55861	0	7.36812	0.994	0.845	C1		NECAB3	63941	8.88413e-21	-1.45681	0.36	0.483	C2		FRAT2	23401	5.04764e-74	-1.10544	0.069	0.364	C3
ARRDC4	91947	4.40215e-16	8.34976	0.341	0.258	C0		RCOR1	23186	2.56543e-66	7.36772	0.837	0.67	C1		FAM89A	375061	0.0036883	-1.45761	0.352	0.381	C2		CASP7	840	1.76145e-69	-1.10569	0.078	0.361	C3
PPAN	56342	0.00307543	8.34576	0.531	0.531	C0		DCLRE1B	64858	3.42197e-278	7.36534	0.655	0.235	C1		NUDT15	55270	0.000294791	-1.46081	0.609	0.53	C2		MRI1	84245	3.12438e-77	-1.10651	0.071	0.373	C3
GRHL1	29841	2.27858e-24	8.29753	0.549	0.439	C0		MRPS36	92259	3.03499e-207	7.36355	0.985	0.839	C1		SPTLC1	10558	0.00376779	-1.46285	0.714	0.691	C2		STX1A	6804	8.48801e-61	-1.10686	0.045	0.293	C3
AL139246.5		1.47642e-38	8.28389	0.324	0.197	C0		SNX6	58533	2.30732e-193	7.36284	0.989	0.873	C1		TRIM24	8805	0.00729955	-1.46671	0.556	0.566	C2		ZCCHC14	23174	1.11403e-62	-1.10719	0.078	0.341	C3
KDM6B	23135	3.23602e-57	8.27483	0.502	0.328	C0		CUL5	8065	6.01435e-69	7.34188	0.72	0.525	C1		NUP35	129401	2.69148e-19	-1.46746	0.636	0.487	C2		RNF169	254225	6.31692e-61	-1.10747	0.097	0.359	C3
MIDN	90007	1.5772e-12	8.26598	0.745	0.642	C0		LMNB1	4001	0	7.33925	0.77	0.208	C1		SLAIN2	57606	0.0019851	-1.46828	0.573	0.58	C2		VPS33A	65082	5.56833e-73	-1.1079	0.07	0.359	C3
WNT7B	7477	4.38362e-28	8.25897	0.755	0.644	C0		FZD4	8322	2.24251e-24	7.33665	0.634	0.501	C1		TMEM167B	56900	1.58136e-06	-1.47358	0.359	0.417	C2		RPS6KA1	6195	3.59863e-74	-1.10822	0.053	0.341	C3
HSD17B7	51478	0.00225518	8.25585	0.52	0.478	C0		SRRM1	10250	0	7.33522	0.993	0.841	C1		FAIM	55179	1.99031e-09	-1.47466	0.757	0.636	C2		MCCC1	56922	9.09112e-80	-1.10848	0.057	0.36	C3
TMEM45B	120224	1.07576e-38	8.24293	0.852	0.744	C0		CHCHD5	84269	2.27913e-213	7.33075	0.988	0.841	C1		MRTFB	57496	3.92478e-05	-1.47712	0.444	0.489	C2		NCK1-DT	101927597	2.93446e-64	-1.10978	0.068	0.333	C3
GOSR1	9527	6.20982e-07	8.21815	0.801	0.695	C0		ATIC	471	6.55824e-278	7.32286	0.999	0.905	C1		NAGK	55577	9.48291e-05	-1.47788	0.641	0.645	C2		BOLA2B	654483	1.00373e-73	-1.11242	0.046	0.331	C3
DUSP16	80824	0.00025678	8.21449	0.298	0.264	C0		FXR1	8087	9.39508e-176	7.31902	0.971	0.817	C1		FAM174B	400451	1.12516e-09	-1.47951	0.39	0.457	C2		FUT3	2525	4.45248e-70	-1.11249	0.043	0.316	C3
PRSS8	5652	7.85631e-57	8.20856	0.729	0.565	C0		LINC02657	105376382	2.27237e-136	7.319	0.649	0.37	C1		PPP1R18	170954	0.000701668	-1.47968	0.439	0.376	C2		DCAF15	90379	3.24857e-72	-1.11272	0.048	0.329	C3
LYST	1130	2.88102e-61	8.19845	0.65	0.458	C0		C1D	10438	1.92168e-204	7.30423	0.982	0.824	C1		FBXL5	26234	3.37781e-09	-1.4861	0.26	0.336	C2		PVR	5817	1.2236e-63	-1.11275	0.065	0.329	C3
ZNF787	126208	0.00014062	8.17168	0.771	0.719	C0		EIF4E	1977	3.37378e-284	7.28621	0.981	0.779	C1		ARAP2	116984	0.00671122	-1.4923	0.43	0.46	C2		KIF3C	3797	5.08879e-43	-1.11317	0.07	0.271	C3
COPB2	9276	5.74428e-54	8.16759	0.935	0.799	C0		GGH	8836	2.35141e-297	7.2811	0.958	0.707	C1		TRPC4AP	26133	0.00171548	-1.4926	0.536	0.552	C2		POLRMT	5442	3.07206e-72	-1.11347	0.065	0.352	C3
AK6	102157402	0.000471733	8.12444	0.732	0.7	C0		MXD3	83463	0	7.26693	0.569	0.121	C1		OFD1	8481	0.000799505	-1.49647	0.521	0.549	C2		SEMA4D	10507	1.57471e-48	-1.11359	0.062	0.278	C3
ATP9A	10079	1.01519e-42	8.07388	0.558	0.407	C0		SMC1A	8243	0	7.25842	0.873	0.473	C1		CYP4F3	4051	0.000158865	-1.49953	0.218	0.266	C2		DHRS4-AS1	55449	6.12753e-64	-1.11517	0.059	0.321	C3
MIR31HG	554202	1.41735e-06	8.0458	0.251	0.204	C0		COX14	84987	1.07141e-258	7.25288	0.999	0.896	C1		SYT7	9066	1.16092e-14	-1.50052	0.278	0.379	C2		TFCP2	7024	7.54698e-67	-1.11631	0.074	0.348	C3
WBP2	23558	1.2532e-34	8.02749	0.675	0.542	C0		MOB4	25843	3.38136e-291	7.23783	0.995	0.872	C1		TMEM214	54867	0.000173695	-1.50114	0.467	0.491	C2		CCDC130	81576	5.65799e-74	-1.11631	0.052	0.339	C3
AP002387.2		3.01366e-06	7.96505	0.468	0.417	C0		COMMD4	54939	0	7.2376	0.971	0.72	C1		MRM3	55178	0.00629823	-1.50282	0.425	0.376	C2		ARL5B	221079	3.89295e-63	-1.11639	0.064	0.325	C3
FOXC1	2296	1.46216e-06	7.96272	0.392	0.337	C0		TRIM2	23321	2.10101e-62	7.22405	0.702	0.514	C1		C9orf116	138162	0.00197505	-1.50363	0.404	0.44	C2		RNGTT	8732	1.98899e-76	-1.11657	0.067	0.365	C3
VPS35	55737	1.29858e-05	7.93358	0.969	0.875	C0		SEPTIN11	55752	3.68076e-255	7.21459	0.938	0.678	C1		LGALS8	3964	6.58106e-07	-1.508	0.444	0.502	C2		KLF16	83855	8.49206e-61	-1.11662	0.063	0.316	C3
APMAP	57136	7.99595e-34	7.92666	0.966	0.85	C0		CCN1	3491	4.76982e-51	7.21093	0.42	0.24	C1		ILF3	3609	5.19088e-13	-1.50969	0.899	0.791	C2		KAZALD1	81621	5.39734e-64	-1.1186	0.055	0.317	C3
CHMP4B	128866	1.29444e-10	7.9243	0.886	0.778	C0		NOLC1	9221	8.38483e-274	7.20604	0.886	0.559	C1		RASGEF1A	221002	2.59715e-05	-1.51016	0.393	0.438	C2		CLASP1	23332	1.15106e-68	-1.11863	0.075	0.354	C3
ATP5PD	10476	0.000301731	7.92225	0.994	0.92	C0		MSMB	4477	4.03348e-41	7.20224	0.403	0.243	C1		BICDL2	146439	6.55586e-13	-1.51336	0.44	0.52	C2		SLC39A8	64116	3.77663e-50	-1.11888	0.066	0.29	C3
ALKBH5	54890	0.00145507	7.91614	0.707	0.674	C0		NDUFAF3	25915	4.25532e-154	7.19319	0.932	0.758	C1		MTAP	4507	0.000500978	-1.51507	0.438	0.478	C2		RAB4B	53916	6.83404e-76	-1.11994	0.057	0.349	C3
ITGB8	3696	1.05493e-55	7.90356	0.456	0.291	C0		PRPS2	5634	4.26541e-303	7.19242	0.9	0.574	C1		NSL1	25936	1.11648e-10	-1.51603	0.664	0.539	C2		GALT	2592	6.37727e-67	-1.11997	0.044	0.31	C3
SULF2	55959	3.1781e-53	7.87788	0.933	0.807	C0		BUB1	699	6.36615e-273	7.18899	0.579	0.169	C1		RBMX	27316	4.91797e-12	-1.52121	0.94	0.806	C2		WDR6	11180	1.95661e-62	-1.12028	0.073	0.335	C3
LPIN1	23175	9.63302e-26	7.87141	0.407	0.299	C0		TMEM109	79073	0	7.18892	0.968	0.676	C1		C9orf40	55071	1.18859e-06	-1.52631	0.364	0.279	C2		XPO5	57510	3.10723e-65	-1.1213	0.074	0.344	C3
CHMP2B	25978	2.06425e-18	7.85603	0.812	0.704	C0		DHX9	1660	5.41426e-288	7.18577	0.957	0.724	C1		CNOT9	9125	0.00438115	-1.52787	0.698	0.627	C2		CEP89	84902	4.44369e-67	-1.12138	0.068	0.342	C3
GGPS1	9453	2.62696e-16	7.84149	0.874	0.74	C0		WRNIP1	56897	7.8563e-159	7.18173	0.753	0.464	C1		MED29	55588	2.2664e-09	-1.5334	0.461	0.524	C2		GTF2E1	2960	3.15199e-63	-1.12175	0.068	0.332	C3
SARS	6301	2.39457e-16	7.81579	0.874	0.745	C0		GLA	2717	4.60523e-292	7.17983	0.82	0.423	C1		BMS1	9790	0.00479375	-1.53568	0.726	0.669	C2		SDR39U1	56948	6.31073e-74	-1.12252	0.066	0.357	C3
MAP3K13	9175	1.99765e-08	7.79269	0.93	0.809	C0		SLC18B1	116843	8.74058e-26	7.17721	0.331	0.216	C1		MAN1B1	11253	0.00180695	-1.53716	0.541	0.564	C2		DCAF5	8816	1.01137e-69	-1.12265	0.069	0.349	C3
BOK	666	7.78842e-21	7.76709	0.633	0.522	C0		APEX1	328	3.02905e-241	7.15047	0.995	0.868	C1		RPS6KA2	6196	4.93109e-08	-1.54048	0.37	0.444	C2		FAM76A	199870	8.32955e-62	-1.12343	0.07	0.331	C3
U2SURP	23350	9.76754e-37	7.76245	0.86	0.813	C0		MRPS2	51116	0	7.12367	0.969	0.725	C1		PLA2G7	7941	0.000470915	-1.54265	0.413	0.456	C2		NFYA	4800	2.70152e-49	-1.12379	0.052	0.269	C3
DUSP4	1846	3.67951e-11	7.70283	0.926	0.838	C0		PDHA1	5160	1.83669e-264	7.12004	0.98	0.809	C1		PRPSAP1	5635	1.45085e-10	-1.54349	0.82	0.697	C2		SWAP70	23075	1.32901e-51	-1.12397	0.078	0.311	C3
ERLEC1	27248	7.80362e-33	7.69246	0.803	0.686	C0		PIF1	80119	1.35189e-253	7.09485	0.291	0.028	C1		NUP93	9688	2.71368e-17	-1.54486	0.746	0.593	C2		PDIA5	10954	4.65748e-62	-1.12447	0.061	0.317	C3
SEC62	7095	0.0042911	7.61741	0.946	0.841	C0		ELAVL1	1994	0	7.08715	0.982	0.791	C1		WDR76	79968	2.62321e-05	-1.55086	0.275	0.209	C2		MARF1	9665	2.01083e-69	-1.12452	0.08	0.364	C3
AP1S3	130340	3.59459e-09	7.56688	0.732	0.657	C0		CDKN2C	1031	0	7.08156	0.55	0.082	C1		MAP3K11	4296	0.00776096	-1.55329	0.566	0.568	C2		GFOD2	81577	8.06624e-72	-1.12475	0.073	0.359	C3
ACOX2	8309	1.53188e-05	7.54492	0.663	0.664	C0		C1QTNF6	114904	3.56791e-72	7.07583	0.712	0.51	C1		NBDY	550643	8.70107e-13	-1.55453	0.421	0.5	C2		SLC16A3	9123	9.91311e-67	-1.12502	0.076	0.35	C3
CLCA2	9635	4.84924e-21	7.54018	0.44	0.34	C0		TRAP1	10131	3.71763e-305	7.06344	0.954	0.703	C1		DYRK4	8798	0.00208834	-1.55461	0.374	0.408	C2		SSH1	54434	1.96675e-65	-1.12531	0.08	0.352	C3
CASZ1	54897	4.31001e-19	7.52871	0.438	0.351	C0		KIFC1	3833	0	7.05887	0.719	0.124	C1		TOM1L1	10040	4.78668e-07	-1.55727	0.678	0.692	C2		OSCP1	127700	7.03319e-77	-1.12587	0.061	0.36	C3
AC244090.1		2.53284e-14	7.51349	0.699	0.594	C0		PPP1R16A	84988	2.13066e-140	7.04188	0.768	0.491	C1		DTX4	23220	5.89739e-10	-1.56141	0.3	0.378	C2		KLHL35	283212	1.62558e-54	-1.12642	0.05	0.281	C3
SLC40A1	30061	1.64638e-96	7.51046	0.695	0.483	C0		POLD3	10714	0	7.03908	0.765	0.312	C1		EPHX3	79852	3.83823e-07	-1.57159	0.28	0.341	C2		MAU2	23383	5.65459e-70	-1.127	0.059	0.338	C3
LHX1	3975	3.17959e-17	7.50932	0.497	0.407	C0		DHTKD1	55526	0	7.03208	0.907	0.402	C1		NSUN5	55695	0.000428485	-1.5746	0.707	0.629	C2		FAR1	84188	2.4568e-64	-1.12705	0.077	0.344	C3
GADD45GIP1	90480	3.44938e-10	7.50762	0.992	0.899	C0		SMIM13	221710	1.33105e-276	7.02949	0.846	0.481	C1		SLC17A5	26503	1.46029e-07	-1.57471	0.344	0.409	C2		ARID4A	5926	1.2147e-67	-1.12745	0.078	0.357	C3
PDIA6	10130	4.17185e-05	7.50643	0.994	0.906	C0		TIMM13	26517	0	7.0285	0.991	0.884	C1		CD82	3732	8.65695e-09	-1.57881	0.29	0.37	C2		CGN	57530	2.34893e-59	-1.12757	0.062	0.311	C3
MYD88	4615	1.27904e-18	7.50087	0.338	0.247	C0		NSFL1C	55968	1.22677e-212	6.99722	0.993	0.868	C1		PINK1	65018	7.58141e-07	-1.58396	0.415	0.47	C2		SMARCAL1	50485	1.24461e-80	-1.12834	0.052	0.357	C3
SLC20A1	6574	2.21159e-11	7.49734	0.541	0.594	C0		CENPK	64105	0	6.99278	0.918	0.32	C1		PPIL1	51645	1.90961e-09	-1.58523	0.625	0.525	C2		MUL1	79594	3.34518e-68	-1.12903	0.072	0.349	C3
ISOC2	79763	3.65166e-05	7.48722	0.98	0.883	C0		TUBB3	10381	7.78337e-168	6.99208	0.974	0.799	C1		MASTL	84930	5.55074e-05	-1.59057	0.276	0.217	C2		NPRL2	10641	5.3467e-81	-1.12915	0.062	0.37	C3
IFNGR2	3460	3.06078e-95	7.47866	0.766	0.563	C0		RNF114	55905	1.89979e-246	6.99107	1	0.921	C1		ZHX1	11244	0.000123375	-1.59645	0.414	0.454	C2		TRIM34	53840	3.37107e-63	-1.12915	0.068	0.333	C3
IFRD1	3475	1.86021e-11	7.47716	0.431	0.486	C0		NSD3	54904	3.63392e-203	6.97302	0.867	0.565	C1		FBXL15	79176	8.96294e-06	-1.59824	0.457	0.504	C2		MDN1	23195	1.56543e-67	-1.13062	0.074	0.352	C3
OAT	4942	2.00205e-31	7.47335	0.948	0.83	C0		SUMO1	7341	0	6.96707	1	0.926	C1		OCEL1	79629	3.73562e-14	-1.60374	0.442	0.531	C2		AC009236.1		2.90559e-54	-1.13095	0.045	0.274	C3
EXOSC4	54512	1.709e-18	7.46971	0.894	0.757	C0		PABPC4	8761	1.83742e-266	6.95516	0.99	0.872	C1		ERCC6	2074	0.000515444	-1.60489	0.455	0.487	C2		EDC4	23644	7.72501e-68	-1.13154	0.092	0.374	C3
ABCC2	1244	6.72199e-05	7.4556	0.815	0.74	C0		TIMM17B	10245	1.10464e-223	6.95075	0.958	0.734	C1		DDX6	1656	1.36386e-05	-1.60553	0.698	0.626	C2		RNF170	81790	3.85452e-69	-1.13344	0.049	0.324	C3
PSME1	5720	5.64232e-10	7.43956	0.985	0.888	C0		TRAPPC5	126003	7.54397e-124	6.94284	0.999	0.929	C1		FANCB	2187	4.83995e-15	-1.60642	0.318	0.208	C2		AP5S1	55317	9.0619e-59	-1.13504	0.079	0.332	C3
TSPAN3	10099	2.65974e-19	7.42617	0.906	0.793	C0		NDUFS2	4720	1.72388e-219	6.92909	0.984	0.811	C1		TOX2	84969	7.51137e-06	-1.60661	0.346	0.402	C2		APC	324	4.5493e-65	-1.1354	0.096	0.372	C3
PAQR5	54852	8.65264e-16	7.41591	0.329	0.247	C0		CTDNEP1	23399	1.23873e-274	6.92298	0.963	0.761	C1		FAM104B	90736	0.000309511	-1.60784	0.496	0.52	C2		TINF2	26277	5.9552e-74	-1.13624	0.061	0.35	C3
EPRS	2058	0.00654372	7.41072	0.928	0.819	C0		PTK7	5754	5.87418e-133	6.92245	0.768	0.5	C1		HNMT	3176	4.16232e-06	-1.61034	0.528	0.571	C2		INPP4A	3631	1.48103e-70	-1.13676	0.081	0.367	C3
CLTC	1213	1.64556e-08	7.40561	0.908	0.789	C0		PRSS23	11098	1.05868e-112	6.92227	0.786	0.537	C1		CNOT8	9337	2.7503e-09	-1.61184	0.536	0.585	C2		TCF4	6925	2.01179e-46	-1.13682	0.052	0.258	C3
CHKA	1119	6.43748e-05	7.38883	0.413	0.443	C0		IRF2BPL	64207	2.04778e-125	6.90739	0.885	0.696	C1		PRPF19	27339	1.0914e-05	-1.61212	0.721	0.615	C2		TSPAN4	7106	4.0411e-55	-1.13716	0.047	0.28	C3
ZNF655	79027	9.83266e-14	7.34447	0.623	0.537	C0		SRSF4	6429	1.89111e-227	6.90094	0.867	0.569	C1		TTC37	9652	0.000367944	-1.6127	0.549	0.571	C2		ZBTB1	22890	1.67665e-79	-1.13742	0.064	0.37	C3
TDP2	51567	5.96976e-07	7.31246	0.795	0.71	C0		MCM6	4175	0	6.8955	0.797	0.285	C1		UNC5A	90249	3.12395e-12	-1.61368	0.267	0.358	C2		CHUK	1147	3.60975e-72	-1.13788	0.069	0.358	C3
PAM16	51025	0.00010821	7.28541	0.968	0.858	C0		GSDMD	79792	3.20026e-215	6.89125	0.961	0.747	C1		R3HDM2	22864	0.00966812	-1.6141	0.67	0.657	C2		DOLPP1	57171	1.04403e-76	-1.13811	0.057	0.353	C3
TMED9	54732	2.44658e-29	7.26898	0.983	0.854	C0		HGS	9146	1.28174e-171	6.86673	0.881	0.658	C1		UBXN6	80700	1.34239e-06	-1.61974	0.454	0.504	C2		MBD3	53615	2.76998e-63	-1.13923	0.075	0.339	C3
VCP	7415	8.86607e-13	7.2439	0.946	0.833	C0		NUP214	8021	2.92158e-113	6.86183	0.578	0.303	C1		TNKS2	80351	5.19625e-05	-1.62529	0.597	0.62	C2		ZNF791	163049	5.72641e-73	-1.13934	0.085	0.379	C3
DDX10	1662	8.78941e-11	7.24236	0.284	0.349	C0		TRIM16	10626	5.09546e-150	6.86126	0.909	0.693	C1		AC015871.1		0.00504635	-1.62561	0.498	0.514	C2		MYO5A	4644	8.38017e-49	-1.14034	0.067	0.287	C3
BSPRY	54836	5.42774e-06	7.18611	0.614	0.616	C0		TCEA1	6917	1.2166e-245	6.85243	0.966	0.774	C1		MYO5B	4645	7.65713e-07	-1.62596	0.41	0.465	C2		IGFLR1	79713	6.54091e-59	-1.1421	0.051	0.296	C3
RIOK3	8780	1.15648e-18	7.09734	0.614	0.52	C0		COPRS	55352	0	6.84776	1	0.906	C1		AC127526.5		0.00257757	-1.62724	0.327	0.364	C2		GLUD1	2746	4.63321e-76	-1.14228	0.078	0.379	C3
BAG1	573	5.09265e-45	7.07509	0.801	0.649	C0		XRN2	22803	0	6.84359	0.999	0.876	C1		ARPC4	10093	0.00141156	-1.63108	0.793	0.718	C2		MTR	4548	2.03161e-73	-1.14347	0.061	0.349	C3
RP9	6100	1.17757e-18	7.07229	0.573	0.62	C0		SNRPC	6631	4.61852e-300	6.84119	0.99	0.851	C1		KCTD20	222658	0.00975695	-1.63296	0.46	0.477	C2		APPL2	55198	4.01886e-64	-1.14478	0.069	0.333	C3
DENND10	404636	1.36861e-16	7.03183	0.688	0.599	C0		ABCF2	10061	1.81986e-238	6.8407	0.962	0.755	C1		SCAMP2	10066	7.67878e-16	-1.63326	0.472	0.575	C2		GPR157	80045	9.29454e-66	-1.14567	0.054	0.32	C3
ATP6V1C2	245973	8.35554e-55	7.01702	0.466	0.307	C0		MRPS22	56945	4.15084e-184	6.8383	0.963	0.775	C1		BUB1B	701	4.69294e-28	-1.63801	0.294	0.156	C2		ARHGEF7	8874	1.34029e-67	-1.14665	0.054	0.324	C3
ANKRD22	118932	7.38274e-11	7.01687	0.575	0.488	C0		FAM120A	23196	3.10181e-229	6.83233	0.992	0.881	C1		R3HDM4	91300	0.000163275	-1.64038	0.501	0.525	C2		RASSF8-AS1	100506451	4.14271e-61	-1.14722	0.067	0.321	C3
MAPRE1	22919	8.45181e-11	7.01186	0.919	0.833	C0		TOMM70	9868	1.37164e-154	6.82496	0.956	0.776	C1		GOT2	2806	3.21511e-05	-1.64389	0.704	0.603	C2		NRAV	100506668	6.09166e-66	-1.14871	0.062	0.33	C3
MGAT1	4245	9.76037e-11	7.00065	0.719	0.701	C0		FIBP	9158	1.27125e-260	6.81569	0.994	0.873	C1		UBLCP1	134510	0.00626892	-1.64976	0.614	0.617	C2		ZNF267	10308	1.94594e-64	-1.14874	0.051	0.313	C3
GJB3	2707	3.05708e-08	6.99692	0.605	0.541	C0		HSPA9	3313	0	6.80642	0.998	0.89	C1		VRK1	7443	1.2657e-18	-1.65206	0.482	0.334	C2		ATG2A	23130	1.50904e-68	-1.14932	0.074	0.352	C3
PI4K2A	55361	0.000345181	6.99482	0.33	0.293	C0		IFNGR1	3459	7.63436e-83	6.79996	0.85	0.644	C1		ALDH16A1	126133	6.91992e-05	-1.65391	0.65	0.575	C2		PTPN18	26469	1.5029e-73	-1.14951	0.063	0.351	C3
SORD	6652	2.28913e-16	6.9834	0.668	0.574	C0		BLCAP	10904	3.62431e-110	6.79582	0.918	0.743	C1		FOXK2	3607	8.94034e-05	-1.65482	0.429	0.477	C2		HSD3B7	80270	1.4435e-75	-1.15137	0.06	0.354	C3
SLK	9748	0.00187066	6.98181	0.803	0.724	C0		QKI	9444	2.4602e-120	6.78707	0.856	0.637	C1		MRPL9	65005	0.000350225	-1.66213	0.87	0.787	C2		MIS12	79003	3.31706e-63	-1.1515	0.084	0.351	C3
P4HA2	8974	1.14847e-09	6.97525	0.347	0.28	C0		CENPM	79019	0	6.77948	0.926	0.337	C1		TMEM259	91304	5.31741e-07	-1.66268	0.707	0.716	C2		GPRC5B	51704	6.09431e-46	-1.15194	0.116	0.339	C3
FAM114A1	92689	1.02404e-27	6.95273	0.815	0.7	C0		IMP3	55272	2.82049e-208	6.75131	0.937	0.714	C1		KAZN	23254	1.63555e-10	-1.66498	0.21	0.294	C2		PTDSS2	81490	5.57401e-74	-1.15214	0.046	0.331	C3
AL033504.1		1.8908e-11	6.91635	0.89	0.786	C0		AAMP	14	7.08599e-217	6.74987	0.991	0.859	C1		TPGS1	91978	2.1587e-06	-1.66651	0.539	0.578	C2		HELZ	9931	2.88592e-70	-1.15307	0.087	0.375	C3
PELO	53918	0.00627376	6.91373	0.656	0.592	C0		PSME3	10197	1.11606e-146	6.7453	0.844	0.617	C1		BABAM2	9577	0.00289461	-1.66658	0.587	0.597	C2		HEIH	100859930	7.98997e-66	-1.15318	0.052	0.318	C3
JCAD	57608	3.67436e-57	6.90227	0.4	0.237	C0		RPA2	6118	1.57084e-269	6.73851	0.735	0.314	C1		AMIGO2	347902	0.000111138	-1.66668	0.229	0.279	C2		CCDC112	153733	1.5443e-61	-1.15331	0.079	0.339	C3
NAV1	89796	7.16159e-06	6.90216	0.393	0.345	C0		GOLPH3	64083	2.69543e-168	6.73841	0.948	0.767	C1		NSD2	7468	5.82672e-15	-1.67264	0.472	0.331	C2		RAP1GDS1	5910	1.26146e-70	-1.15457	0.084	0.371	C3
PPP1R14C	81706	1.64436e-13	6.89025	0.826	0.725	C0		HLTF	6596	0	6.7365	0.934	0.554	C1		GEMIN2	8487	8.86113e-05	-1.67511	0.514	0.43	C2		SAP130	79595	2.31968e-58	-1.15565	0.082	0.336	C3
SLC2A1	6513	3.53676e-12	6.87669	0.661	0.573	C0		NDC1	55706	4.60491e-303	6.70044	0.825	0.42	C1		UBR5	51366	0.00255109	-1.68346	0.723	0.671	C2		MPPE1	65258	7.5697e-69	-1.15595	0.068	0.345	C3
EXOSC1	51013	9.97172e-05	6.87444	0.669	0.652	C0		POLE4	56655	0	6.6921	0.997	0.873	C1		CYB5D2	124936	0.00266137	-1.68355	0.312	0.347	C2		LINC00942	100292680	3.15866e-62	-1.15689	0.069	0.329	C3
PBDC1	51260	2.62113e-09	6.778	0.846	0.742	C0		NCAPD3	23310	0	6.68942	0.818	0.292	C1		SOS2	6655	2.15463e-07	-1.68496	0.323	0.382	C2		ADGRA3	166647	1.865e-57	-1.15834	0.054	0.296	C3
NOL8	55035	1.18127e-13	6.74148	0.428	0.491	C0		MAZ	4150	0	6.68173	0.974	0.761	C1		HAUS4	54930	2.27353e-06	-1.68966	0.772	0.665	C2		IRGQ	126298	6.9876e-64	-1.15908	0.061	0.322	C3
LIN52	91750	3.13618e-40	6.72646	0.249	0.382	C0		ATP5F1A	498	1.12618e-283	6.67518	0.998	0.905	C1		CCM2	83605	0.00200102	-1.6947	0.538	0.47	C2		DYRK1A	1859	3.10166e-60	-1.15945	0.069	0.323	C3
AUP1	550	9.14775e-13	6.72004	0.662	0.668	C0		LRP10	26020	2.22604e-80	6.66509	0.912	0.751	C1		MAP7D1	55700	0.00326683	-1.69711	0.55	0.495	C2		GID4	79018	7.9109e-55	-1.15957	0.07	0.309	C3
LGR4	55366	5.18178e-43	6.71325	0.789	0.671	C0		NUP62	23636	0	6.65453	0.903	0.525	C1		SNAP47	116841	0.000442068	-1.69822	0.713	0.636	C2		CNNM3	26505	1.1811e-68	-1.15964	0.053	0.327	C3
TMEM41B	440026	9.65617e-22	6.70213	0.776	0.654	C0		TIMM10	26519	0	6.6475	0.988	0.824	C1		FBXO28	23219	0.00279378	-1.70519	0.571	0.592	C2		MYSM1	114803	7.19529e-73	-1.15996	0.07	0.359	C3
LINC00239	145200	0.000144372	6.68295	0.302	0.262	C0		SRM	6723	1.49299e-281	6.63672	0.958	0.744	C1		ZRANB2	9406	0.00106292	-1.70519	0.826	0.741	C2		PLOD3	8985	6.20657e-69	-1.16024	0.058	0.333	C3
GOLT1B	51026	0.00169656	6.6822	0.731	0.656	C0		GALNT2	2590	6.39718e-93	6.62009	0.801	0.588	C1		LYPLA2	11313	1.17299e-09	-1.70788	0.594	0.639	C2		FBXL18	80028	1.79914e-61	-1.16156	0.065	0.323	C3
LINC00514	283875	1.33941e-72	6.67131	0.861	0.709	C0		TGOLN2	10618	2.31131e-184	6.61998	0.972	0.815	C1		CIP2A	57650	2.06778e-50	-1.7134	0.589	0.337	C2		GIT1	28964	2.3969e-66	-1.16184	0.073	0.346	C3
MCTS1	28985	0.000191915	6.65512	0.992	0.902	C0		TACC1	6867	1.41264e-193	6.60418	0.637	0.288	C1		CPSF6	11052	2.29944e-09	-1.71551	0.812	0.691	C2		PROSER1	80209	4.09643e-73	-1.16288	0.063	0.352	C3
CCDC66	285331	6.52747e-08	6.64728	0.332	0.382	C0		GNG4	2786	7.25179e-190	6.60065	0.748	0.413	C1		TRAF3IP2	10758	0.000409417	-1.72181	0.283	0.33	C2		ATP13A2	23400	5.55061e-69	-1.16379	0.07	0.348	C3
ASMTL	8623	3.19848e-16	6.60916	0.479	0.381	C0		NARS	4677	1.00993e-163	6.60028	0.944	0.76	C1		CBLC	23624	7.51014e-08	-1.7258	0.473	0.522	C2		PACSIN2	11252	5.77007e-65	-1.16381	0.082	0.354	C3
PIM1	5292	4.91557e-07	6.5536	0.244	0.293	C0		XRCC6	2547	0	6.58985	0.999	0.927	C1		PPFIBP1	8496	1.70753e-11	-1.72596	0.294	0.382	C2		AARSD1	80755	3.99507e-81	-1.1658	0.05	0.355	C3
SSH2	85464	0.00226127	6.55215	0.504	0.519	C0		MNAT1	4331	2.76996e-160	6.56994	0.87	0.626	C1		SECISBP2	79048	1.65959e-06	-1.72844	0.536	0.568	C2		TATDN3	128387	4.55699e-74	-1.16608	0.073	0.366	C3
SLC12A2	6558	2.01411e-07	6.54432	0.795	0.732	C0		SCAF11	9169	2.33941e-166	6.55576	0.949	0.77	C1		NSUN2	54888	0.00711532	-1.73016	0.812	0.729	C2		FBXO27	126433	1.82868e-47	-1.16661	0.058	0.269	C3
NSDHL	50814	1.62795e-61	6.51891	0.867	0.723	C0		NIPBL	25836	1.57129e-163	6.54495	0.938	0.745	C1		LIMS1	3987	0.00120567	-1.73141	0.838	0.749	C2		CBWD1	55871	1.19346e-78	-1.16732	0.081	0.387	C3
TOM1L2	146691	5.33987e-50	6.5152	0.475	0.313	C0		NEIL3	55247	0	6.5417	0.609	0.071	C1		AP5B1	91056	2.02884e-11	-1.73318	0.359	0.443	C2		FAHD2B	151313	3.79716e-90	-1.16778	0.038	0.363	C3
LUC7L3	51747	3.99128e-32	6.51029	0.896	0.821	C0		UXT	8409	2.67125e-259	6.5307	0.993	0.863	C1		GOLGA3	2802	0.000135373	-1.73422	0.549	0.57	C2		SYK	6850	2.16621e-64	-1.16814	0.096	0.368	C3
MAP3K5	4217	4.24237e-08	6.50669	0.516	0.447	C0		ZBTB8OS	339487	6.22071e-233	6.52249	0.968	0.788	C1		TFB2M	64216	9.15961e-05	-1.73625	0.706	0.63	C2		FAM122A	116224	1.86721e-75	-1.16818	0.054	0.347	C3
PSMA2	5683	6.56837e-08	6.49713	0.997	0.928	C0		AREL1	9870	2.63571e-50	6.5182	0.511	0.329	C1		SLC39A3	29985	0.00242103	-1.73675	0.718	0.694	C2		CXorf40A	91966	1.59191e-62	-1.16844	0.051	0.307	C3
SELENOM	140606	3.20897e-34	6.49455	0.811	0.691	C0		ZNRF2	223082	8.60808e-164	6.50225	0.83	0.554	C1		ZNF277	11179	6.02979e-10	-1.73729	0.413	0.49	C2		CCDC92	80212	1.80358e-67	-1.16873	0.087	0.368	C3
TRAPPC2B	10597	0.00161578	6.48583	0.49	0.451	C0		ADCK2	90956	3.70195e-135	6.47074	0.657	0.373	C1		LRRC8D	55144	0.00113891	-1.74509	0.437	0.471	C2		SYTL1	84958	2.68338e-69	-1.1692	0.047	0.321	C3
MUC1	4582	4.81784e-35	6.47169	0.674	0.544	C0		GLRX3	10539	8.32957e-262	6.46884	0.978	0.804	C1		SERPINB8	5271	0.00494797	-1.74734	0.264	0.301	C2		PHF12	57649	1.00653e-70	-1.1693	0.068	0.352	C3
B3GNT2	10678	1.20202e-22	6.45193	0.792	0.691	C0		CDC42EP1	11135	4.33129e-132	6.46092	0.771	0.521	C1		ETFRF1	144363	0.000103686	-1.75064	0.483	0.512	C2		ABCD1	215	5.45485e-62	-1.16984	0.039	0.288	C3
TSPAN17	26262	6.09088e-12	6.44362	0.543	0.462	C0		AKR7A2	8574	1.09007e-294	6.4597	0.993	0.85	C1		ITGB6	3694	1.50859e-10	-1.75324	0.206	0.288	C2		BTBD6	90135	2.08765e-77	-1.16985	0.075	0.378	C3
FAM53C	51307	5.78642e-09	6.43529	0.342	0.398	C0		CMPK1	51727	2.05179e-275	6.41213	1	0.893	C1		IL1R1	3554	7.27436e-07	-1.76138	0.254	0.321	C2		CACNG4	27092	1.15268e-61	-1.17016	0.053	0.307	C3
PLSCR1	5359	5.03687e-28	6.4128	0.678	0.707	C0		CDC45	8318	0	6.40944	0.715	0.115	C1		CENPS	378708	6.06198e-18	-1.76374	0.588	0.427	C2		TIGD5	84948	4.68132e-77	-1.17091	0.071	0.372	C3
PNPLA8	50640	8.72027e-55	6.40638	0.755	0.596	C0		VTI1B	10490	1.16743e-204	6.40862	0.98	0.845	C1		SHC1	6464	0.00203337	-1.77048	0.529	0.55	C2		POLR3E	55718	3.10734e-68	-1.17187	0.078	0.358	C3
ACTR6	64431	1.97488e-05	6.39409	0.794	0.696	C0		SUB1	10923	0	6.40365	1	0.972	C1		SOCS6	9306	0.000266501	-1.77457	0.381	0.418	C2		CELSR1	9620	3.87056e-65	-1.17395	0.06	0.325	C3
CRIM1	51232	4.34275e-53	6.38733	0.719	0.574	C0		EMC8	10328	4.50773e-281	6.39888	0.954	0.713	C1		GATA2-AS1	101927167	5.18765e-07	-1.77846	0.505	0.553	C2		KIDINS220	57498	6.1754e-55	-1.1742	0.106	0.352	C3
SPAG7	9552	2.38775e-28	6.38465	0.841	0.696	C0		RPS3A	6189	0	6.39449	1	0.985	C1		LDOC1	23641	3.13804e-05	-1.78038	0.278	0.328	C2		HCG18	414777	4.81214e-79	-1.17439	0.05	0.351	C3
FBXO2	26232	7.52452e-42	6.37826	0.365	0.225	C0		PSMD1	5707	1.09577e-280	6.38622	0.986	0.837	C1		CD40	958	3.00919e-14	-1.78109	0.408	0.502	C2		PDZD8	118987	2.39735e-55	-1.17575	0.086	0.331	C3
ZNF185	7739	7.56929e-12	6.33873	0.599	0.514	C0		TMPRSS13	84000	5.89089e-43	6.3729	0.724	0.552	C1		DDX59	83479	0.00624662	-1.78342	0.554	0.559	C2		CCAR2	57805	5.77323e-80	-1.17575	0.069	0.377	C3
TPD52L2	7165	4.77289e-22	6.33633	0.904	0.791	C0		SCRIB	23513	1.64801e-102	6.36851	0.64	0.379	C1		PKP2	5318	0.000611068	-1.7847	0.498	0.427	C2		ZC3H3	23144	2.67387e-85	-1.1759	0.05	0.366	C3
MPST	4357	8.70967e-51	6.33367	0.947	0.812	C0		RNF168	165918	1.4586e-222	6.35959	0.794	0.445	C1		GPC1	2817	6.10448e-07	-1.78582	0.682	0.702	C2		C9orf152	401546	8.21769e-66	-1.17604	0.063	0.33	C3
ZFAND6	54469	8.94107e-55	6.31081	0.973	0.85	C0		CNN3	1266	1.22819e-130	6.35309	0.971	0.839	C1		NMRK1	54981	5.02841e-06	-1.78712	0.346	0.402	C2		CSTF2	1478	2.27872e-81	-1.17614	0.066	0.378	C3
LRRFIP1	9208	8.93529e-11	6.29865	0.983	0.889	C0		RHOA	387	3.91973e-277	6.35233	1	0.929	C1		CCDC174	51244	0.00133186	-1.78794	0.238	0.277	C2		PHLPP2	23035	4.63376e-64	-1.17634	0.067	0.333	C3
MYO1E	4643	8.16586e-17	6.29379	0.48	0.388	C0		NDUFB6	4712	9.48584e-220	6.34603	0.981	0.812	C1		CBX4	8535	0.000509759	-1.79289	0.41	0.451	C2		STK10	6793	1.51052e-52	-1.17688	0.044	0.268	C3
NEDD4L	23327	1.39676e-21	6.29347	0.803	0.69	C0		LMNB2	84823	0	6.33512	0.84	0.394	C1		TTC9C	283237	3.62645e-05	-1.79516	0.459	0.501	C2		BTNL9	153579	2.17584e-54	-1.17722	0.046	0.275	C3
MIA3	375056	1.76571e-21	6.22682	0.742	0.629	C0		MRPS25	64432	1.15122e-176	6.31652	0.888	0.638	C1		PIP4K2C	79837	0.00134431	-1.802	0.567	0.58	C2		DELE1	9812	2.47824e-73	-1.17739	0.078	0.37	C3
OXLD1	339229	5.57752e-22	6.20798	0.859	0.722	C0		KBTBD2	25948	6.40939e-231	6.3118	0.757	0.395	C1		CRB3	92359	3.92932e-05	-1.80285	0.503	0.54	C2		TYW1	55253	8.41882e-79	-1.17753	0.071	0.378	C3
THOP1	7064	7.1957e-63	6.18659	0.279	0.447	C0		TMEM183A	92703	2.15236e-166	6.30458	0.971	0.812	C1		ATXN1	6310	6.38442e-12	-1.80395	0.361	0.449	C2		RBM41	55285	1.76008e-75	-1.17824	0.064	0.359	C3
RBM3	5935	2.15404e-08	6.17168	0.984	0.897	C0		DCBLD2	131566	1.24923e-88	6.29936	0.48	0.245	C1		LONP2	83752	0.00145286	-1.80557	0.667	0.657	C2		LRIG2	9860	1.22574e-72	-1.17832	0.064	0.351	C3
DNAL4	10126	0.00114818	6.16609	0.769	0.685	C0		RPA1	6117	0	6.28756	0.904	0.538	C1		ARID3A	1820	0.00299399	-1.81062	0.486	0.501	C2		OTUD6B	51633	9.3949e-74	-1.17854	0.075	0.368	C3
RSPH1	89765	4.13262e-29	6.16224	0.341	0.228	C0		TSEN15	116461	4.95917e-124	6.27905	0.745	0.494	C1		PIK3CB	5291	4.19223e-06	-1.81808	0.516	0.544	C2		NHLRC3	387921	2.18382e-83	-1.17925	0.044	0.354	C3
ABHD2	11057	2.45681e-09	6.14257	0.717	0.634	C0		PHB2	11331	0	6.26254	0.999	0.921	C1		LLPH	84298	5.38849e-05	-1.81922	0.845	0.769	C2		CDK10	8558	8.83026e-87	-1.17946	0.061	0.383	C3
RAB7A	7879	2.51981e-13	6.10669	0.98	0.864	C0		WEE1	7465	0	6.23452	0.676	0.234	C1		SYTL4	94121	3.63231e-05	-1.82066	0.31	0.363	C2		FANCA	2175	3.53376e-56	-1.17967	0.037	0.269	C3
HNRNPH3	3189	9.6836e-36	6.10419	0.746	0.76	C0		SRD5A3	79644	1.48348e-76	6.2266	0.73	0.519	C1		TMEM79	84283	4.60823e-08	-1.82173	0.35	0.409	C2		ACADS	35	7.33815e-83	-1.17993	0.044	0.352	C3
NOP53	29997	2.00733e-62	6.09608	0.978	0.856	C0		MAVS	57506	2.01213e-98	6.22329	0.807	0.603	C1		RUNX1	861	0.00129645	-1.82311	0.343	0.289	C2		KIF21A	55605	3.01237e-55	-1.18055	0.072	0.312	C3
WDR26	80232	1.64578e-26	6.0731	0.772	0.661	C0		MRPS14	63931	7.77518e-177	6.22156	0.913	0.704	C1		C1orf174	339448	2.05348e-07	-1.82406	0.478	0.401	C2		RGS14	10636	4.61899e-61	-1.18107	0.067	0.322	C3
ID1	3397	6.66136e-26	6.04519	0.168	0.267	C0		PRPF40A	55660	1.07247e-297	6.18534	0.996	0.884	C1		CSTF1	1477	0.00023584	-1.82418	0.512	0.536	C2		SLC37A3	84255	2.62424e-68	-1.18119	0.06	0.334	C3
GNAI1	2770	6.22132e-36	6.04511	0.407	0.28	C0		GFER	2671	1.1313e-210	6.17648	0.946	0.729	C1		FBXW7	55294	0.000128578	-1.82492	0.408	0.449	C2		LINC01135	100131060	1.83011e-68	-1.18145	0.048	0.319	C3
TCEAL4	79921	5.41618e-70	6.04501	0.934	0.808	C0		RNPEP	6051	1.6714e-175	6.17499	0.974	0.834	C1		DIAPH1	1729	2.09926e-12	-1.82939	0.83	0.712	C2		PPP1R8	5511	4.57624e-65	-1.1848	0.094	0.367	C3
HLA-E	3133	7.22741e-37	6.04236	0.828	0.681	C0		SRPK2	6733	1.27634e-130	6.17485	0.877	0.667	C1		MIS18A	54069	6.45107e-35	-1.83213	0.696	0.476	C2		IGF2BP1	10642	2.61072e-61	-1.186	0.094	0.356	C3
NPAS2	4862	0.000562645	6.03677	0.64	0.588	C0		DHX29	54505	8.19744e-120	6.16498	0.885	0.706	C1		NCK1	4690	2.60258e-07	-1.83304	0.657	0.687	C2		KLF11	8462	4.0725e-60	-1.18709	0.053	0.303	C3
TIPARP	25976	7.6016e-10	6.03587	0.277	0.22	C0		ZC3H15	55854	1.8118e-258	6.15213	0.996	0.892	C1		MIA2	4253	1.144e-05	-1.83553	0.494	0.533	C2		MIER2	54531	3.48151e-63	-1.18881	0.048	0.305	C3
EPAS1	2034	4.34369e-06	6.02875	0.721	0.646	C0		ATF7IP	55729	5.00921e-98	6.147	0.661	0.426	C1		ZBTB4	57659	5.44918e-06	-1.84097	0.381	0.434	C2		RIN1	9610	4.49175e-76	-1.18991	0.062	0.357	C3
MRPL28	10573	8.63864e-10	6.01876	0.91	0.796	C0		THOC7	80145	1.79846e-257	6.14488	0.978	0.821	C1		BRD8	10902	0.00380443	-1.84219	0.338	0.291	C2		GEMIN8	54960	2.12991e-74	-1.18993	0.069	0.362	C3
TMEM258	746	0.000108415	6.00836	0.997	0.928	C0		TAF2	6873	1.47772e-107	6.14208	0.68	0.427	C1		ATP6V0E2	155066	0.00662868	-1.84551	0.636	0.561	C2		PANX2	56666	1.93657e-62	-1.19017	0.078	0.341	C3
DAAM1	23002	4.33241e-60	6.00595	0.663	0.491	C0		ATP6V0D1	9114	2.12144e-187	6.13194	0.954	0.766	C1		TUBGCP2	10844	0.000444519	-1.84633	0.523	0.549	C2		N4BP3	23138	8.7436e-67	-1.19043	0.064	0.334	C3
HSBP1L1	440498	6.69892e-13	5.99904	0.844	0.735	C0		KNOP1	400506	2.85076e-196	6.1265	0.917	0.674	C1		RCE1	9986	0.00106216	-1.84783	0.765	0.682	C2		HNRNPA1P48	642659	1.80092e-83	-1.19158	0.06	0.374	C3
C8orf76	84933	0.0068076	5.99271	0.712	0.634	C0		C16orf91	283951	3.76335e-175	6.12341	0.921	0.704	C1		ELFN1-AS1	101927125	0.000309393	-1.8556	0.219	0.265	C2		C12orf43	64897	3.83543e-64	-1.19182	0.059	0.321	C3
ETHE1	23474	2.36287e-66	5.98704	0.962	0.848	C0		MAGEA6	4105	1.50462e-193	6.11731	0.984	0.853	C1		PTRH1	138428	8.61858e-06	-1.86578	0.48	0.528	C2		ITPK1	3705	2.76499e-72	-1.19187	0.071	0.359	C3
DNAJC3	5611	7.84022e-51	5.98418	0.777	0.637	C0		PFDN4	5203	8.36655e-280	6.11586	0.988	0.845	C1		SNX12	29934	3.42743e-05	-1.86623	0.446	0.486	C2		SELENBP1	8991	6.94712e-50	-1.19277	0.05	0.266	C3
MTRNR2L12	100463498	1.44494e-22	5.98337	0.608	0.499	C0		MCM2	4171	0	6.10871	0.788	0.231	C1		GPR108	56927	1.88492e-08	-1.86631	0.479	0.533	C2		C18orf25	147339	1.94567e-71	-1.19292	0.076	0.363	C3
TMEM165	55858	1.18419e-46	5.96754	0.876	0.747	C0		KAT6B	23522	1.23405e-31	6.0951	0.627	0.482	C1		TMC5	79838	0.000260549	-1.86915	0.338	0.375	C2		CEP41	95681	7.44367e-67	-1.19307	0.086	0.364	C3
TRAPPC6A	79090	2.48311e-44	5.91451	0.943	0.807	C0		ITSN2	50618	7.70027e-50	6.09346	0.557	0.385	C1		SHCBP1	79801	1.53061e-36	-1.87166	0.448	0.249	C2		INTS7	25896	9.49198e-70	-1.19313	0.073	0.355	C3
MARCH6	10299	8.79626e-13	5.9057	0.948	0.829	C0		DERA	51071	0	6.09138	0.967	0.735	C1		APEH	327	0.00191938	-1.8888	0.595	0.61	C2		MMD	23531	1.86357e-56	-1.1941	0.066	0.308	C3
RAP1A	5906	6.02058e-06	5.9	0.813	0.727	C0		NELFCD	51497	2.14526e-232	6.09136	0.984	0.834	C1		AKT1	207	3.66321e-05	-1.88916	0.752	0.653	C2		RNF34	80196	7.404e-62	-1.19436	0.079	0.341	C3
ARHGEF9	23229	1.3308e-40	5.89457	0.652	0.508	C0		IDH3B	3420	6.85915e-259	6.08584	0.991	0.84	C1		UTP18	51096	0.00197237	-1.89989	0.746	0.658	C2		PITPNM1	9600	6.52756e-71	-1.19488	0.063	0.345	C3
CAPRIN2	65981	2.2905e-32	5.88294	0.465	0.34	C0		ECHDC1	55862	2.25025e-133	6.08115	0.844	0.607	C1		SIPA1L2	57568	2.62179e-06	-1.90021	0.234	0.296	C2		CCDC113	29070	1.25534e-52	-1.19543	0.071	0.304	C3
ARL6IP5	10550	5.07683e-26	5.87868	0.942	0.846	C0		SEPTIN2	4735	1.33919e-247	6.07951	0.992	0.877	C1		MTFP1	51537	0.000954252	-1.90231	0.484	0.417	C2		SLC27A3	11000	2.25267e-81	-1.19609	0.043	0.346	C3
NDUFA8	4702	0.00076896	5.87097	0.982	0.876	C0		SCO1	6341	3.34876e-167	6.07585	0.858	0.57	C1		ARHGAP18	93663	0.00693279	-1.90332	0.294	0.328	C2		ZCCHC8	55596	1.62226e-63	-1.19663	0.071	0.334	C3
ZNHIT1	10467	3.31786e-25	5.8633	0.991	0.878	C0		PSIP1	11168	0	6.06823	0.883	0.401	C1		OSBPL2	9885	4.40773e-06	-1.90884	0.569	0.597	C2		SEC24D	9871	6.67918e-59	-1.1973	0.067	0.316	C3
FKBP1A	2280	7.03016e-09	5.86164	0.998	0.928	C0		VASN	114990	3.3325e-10	6.0654	0.385	0.307	C1		STIL	6491	0.000732816	-1.91352	0.318	0.255	C2		SARS2	54938	4.2826e-82	-1.19779	0.068	0.38	C3
OSTC	58505	4.73436e-25	5.85849	0.968	0.865	C0		CASC4	113201	1.17334e-120	6.06084	0.881	0.67	C1		CMTR2	55783	0.00732709	-1.9249	0.611	0.616	C2		GTF2H4	2968	4.71995e-89	-1.19837	0.051	0.377	C3
HOMER3	9454	2.53854e-07	5.85545	0.928	0.813	C0		NDUFC1	4717	5.24403e-224	6.05709	0.998	0.905	C1		SMPD4	55627	8.33488e-14	-1.92512	0.59	0.451	C2		IRX2	153572	1.015e-60	-1.19943	0.053	0.305	C3
RHOF	54509	3.51062e-17	5.84765	0.662	0.565	C0		GIPC1	10755	6.27014e-124	6.05349	0.966	0.834	C1		BORCS8	729991	0.000104007	-1.92649	0.558	0.576	C2		FBRS	64319	3.01285e-76	-1.20058	0.072	0.371	C3
AC027601.6		0.00873066	5.81401	0.265	0.236	C0		PDS5A	23244	1.26979e-277	6.04809	0.956	0.751	C1		CCDC91	55297	0.00386629	-1.93376	0.577	0.594	C2		FTO	79068	1.3205e-70	-1.20082	0.096	0.385	C3
SMOX	54498	1.19757e-27	5.79046	0.354	0.241	C0		CISD1	55847	0	6.0361	0.983	0.779	C1		KIF4A	24137	1.48423e-96	-1.93708	0.566	0.26	C2		IKBKE	9641	1.96438e-58	-1.20129	0.042	0.282	C3
COMMD7	149951	1.25163e-07	5.78914	0.914	0.798	C0		CBX3	11335	0	6.02724	1	0.946	C1		NUP205	23165	2.73597e-16	-1.94355	0.608	0.47	C2		TANC1	85461	2.48977e-61	-1.20143	0.064	0.319	C3
TP53I11	9537	4.80305e-35	5.78813	0.825	0.698	C0		BRD7	29117	0	6.02601	0.993	0.866	C1		MEF2A	4205	4.39253e-06	-1.94374	0.573	0.616	C2		PREP	5550	1.00237e-68	-1.20158	0.064	0.34	C3
ALAS1	211	9.30323e-93	5.77486	0.808	0.625	C0		MSH6	2956	1.0473e-178	6.02458	0.707	0.4	C1		RABGGTA	5875	1.87505e-05	-1.94493	0.447	0.488	C2		ARHGEF5	7984	6.94599e-60	-1.20195	0.094	0.353	C3
PHF23	79142	4.96171e-12	5.76736	0.581	0.49	C0		WDR83OS	51398	3.39956e-280	6.02031	1	0.939	C1		RRAGA	10670	7.4672e-08	-1.95089	0.715	0.714	C2		PTCHD1	139411	6.40736e-59	-1.20277	0.047	0.291	C3
LAMP2	3920	2.04239e-60	5.74502	0.974	0.84	C0		RHNO1	83695	0	6.00224	0.828	0.362	C1		B4GALT7	11285	6.31367e-08	-1.9529	0.536	0.578	C2		INSR	3643	2.2012e-50	-1.20291	0.089	0.32	C3
HIPK2	28996	9.48965e-05	5.73681	0.668	0.612	C0		RIF1	55183	6.62197e-283	5.99731	0.887	0.557	C1		SERTAD2	9792	0.00127506	-1.95827	0.473	0.494	C2		STK38	11329	1.57666e-58	-1.20344	0.079	0.33	C3
FTX	100302692	1.9107e-28	5.70102	0.584	0.459	C0		PALLD	23022	6.12751e-239	5.99598	0.909	0.621	C1		SGTA	6449	0.00171321	-1.96276	0.463	0.413	C2		CACFD1	11094	1.0741e-67	-1.20375	0.079	0.357	C3
SRSF2	6427	1.25301e-101	5.67058	0.984	0.884	C0		TMUB1	83590	1.17613e-237	5.99444	0.908	0.656	C1		TMEM19	55266	0.00316289	-1.96426	0.468	0.414	C2		LZTS2	84445	2.3289e-58	-1.20588	0.068	0.316	C3
TEX30	93081	1.21508e-128	5.66756	0.508	0.671	C0		HNRNPC	3183	0	5.99297	0.999	0.935	C1		TNIK	23043	7.14098e-10	-1.96739	0.218	0.299	C2		NOP14	8602	2.67181e-53	-1.20657	0.114	0.36	C3
DAP3	7818	5.52966e-08	5.65499	0.829	0.723	C0		AK1	203	2.82943e-205	5.98803	0.991	0.873	C1		PATJ	10207	7.77606e-07	-1.9699	0.598	0.629	C2		RPRD2	23248	3.65688e-67	-1.20699	0.091	0.37	C3
CBR3	874	2.52771e-74	5.64678	0.496	0.639	C0		GSTZ1	2954	5.20863e-118	5.98602	0.962	0.818	C1		SLC39A1	27173	2.5779e-08	-1.97087	0.885	0.791	C2		WWC2	80014	8.19313e-58	-1.20763	0.086	0.339	C3
POLM	27434	8.94542e-15	5.63954	0.403	0.319	C0		NDUFB1	4707	1.05999e-267	5.98488	0.996	0.897	C1		TMEM242	729515	0.00586445	-1.97131	0.63	0.635	C2		RNF146	81847	6.90477e-78	-1.20963	0.067	0.369	C3
TINCR	257000	8.99962e-51	5.63823	0.665	0.51	C0		MRPS28	28957	1.23396e-204	5.97738	0.993	0.865	C1		PARD3	56288	1.70059e-07	-1.97301	0.434	0.492	C2		LHPP	64077	2.28814e-64	-1.20982	0.066	0.331	C3
ARHGDIA	396	1.4683e-08	5.62567	0.944	0.839	C0		IGF2BP3	10643	4.36795e-168	5.97675	0.835	0.587	C1		PADI2	11240	0.000153345	-1.97317	0.343	0.381	C2		AMN1	196394	3.50884e-56	-1.21048	0.041	0.274	C3
SRSF1	6426	5.34502e-32	5.61425	0.782	0.766	C0		POLR2H	5437	0	5.97239	0.999	0.915	C1		PPM1B	5495	0.00170841	-1.97657	0.438	0.465	C2		RRP12	23223	1.59297e-68	-1.21075	0.045	0.316	C3
OSBPL9	114883	2.15834e-53	5.61243	0.94	0.82	C0		IGFBP4	3487	6.35543e-54	5.97114	0.482	0.294	C1		VIPR1	7433	5.35118e-16	-1.978	0.24	0.345	C2		PPRC1	23082	3.56691e-76	-1.21147	0.045	0.336	C3
KCNQ1OT1	10984	7.00932e-35	5.60125	0.527	0.392	C0		PHIP	55023	2.34617e-282	5.96954	0.837	0.453	C1		NRIP1	8204	2.27084e-06	-1.97866	0.23	0.289	C2		RFT1	91869	4.55783e-79	-1.21173	0.064	0.367	C3
HSPH1	10808	4.58048e-09	5.59403	0.912	0.838	C0		MEST	4232	3.48733e-119	5.96494	0.667	0.405	C1		TMEM192	201931	8.13535e-08	-1.97909	0.534	0.577	C2		ENOSF1	55556	7.69542e-67	-1.21199	0.086	0.363	C3
MDK	4192	1.40235e-29	5.57537	0.976	0.873	C0		SERBP1	26135	0	5.9619	1	0.938	C1		OSGEP	55644	5.74738e-05	-1.98416	0.702	0.615	C2		APH1B	83464	2.28803e-60	-1.21219	0.061	0.313	C3
RAB18	22931	3.48535e-20	5.57236	0.927	0.812	C0		KRTCAP3	200634	6.72216e-182	5.95928	0.92	0.71	C1		PICALM	8301	0.00688777	-1.99357	0.587	0.591	C2		MYBBP1A	10514	2.51654e-68	-1.21235	0.084	0.363	C3
NR3C1	2908	0.00847669	5.55469	0.575	0.581	C0		SRSF3	6428	0	5.95634	0.999	0.928	C1		UROS	7390	0.00472417	-1.9963	0.641	0.638	C2		GMPPB	29925	3.77871e-75	-1.21289	0.063	0.356	C3
STARD7	56910	1.16629e-10	5.55468	0.779	0.754	C0		TCF25	22980	7.70723e-157	5.95344	0.966	0.803	C1		GMPPA	29926	5.72546e-06	-2.0038	0.673	0.694	C2		ZNF75A	7627	3.70051e-77	-1.21361	0.047	0.342	C3
ACOT8	10005	2.89369e-34	5.53824	0.82	0.678	C0		ATP6V0B	533	0	5.95311	1	0.948	C1		MELK	9833	7.08718e-13	-2.00521	0.409	0.276	C2		MED12	9968	3.01216e-62	-1.21393	0.053	0.309	C3
PCSK9	255738	2.52937e-05	5.50832	0.294	0.252	C0		NAA20	51126	0	5.95232	1	0.928	C1		SP1	6667	0.000244824	-2.00527	0.577	0.59	C2		LMTK2	22853	1.27303e-53	-1.21423	0.09	0.332	C3
SLC37A1	54020	0.00193431	5.50793	0.413	0.374	C0		MAPK13	5603	5.76465e-296	5.95204	0.997	0.87	C1		PLPP5	84513	1.27568e-05	-2.00722	0.55	0.577	C2		MOSPD2	158747	1.46766e-77	-1.21442	0.08	0.386	C3
BLZF1	8548	2.94722e-10	5.5009	0.438	0.363	C0		CCT3	7203	0	5.95133	1	0.929	C1		RPP30	10556	1.48602e-16	-2.00828	0.81	0.676	C2		SMIM8	57150	7.07322e-80	-1.21533	0.064	0.369	C3
NFKBIZ	64332	3.9739e-22	5.45211	0.297	0.204	C0		TCEAL3	85012	5.59294e-60	5.95072	0.863	0.682	C1		SNRNP48	154007	1.57428e-08	-2.01128	0.684	0.58	C2		TTC33	23548	4.52084e-71	-1.21538	0.052	0.332	C3
TNFAIP1	7126	8.37178e-09	5.44624	0.619	0.54	C0		UCK2	7371	2.23285e-293	5.94383	0.838	0.454	C1		PMF1	11243	0.00112463	-2.02136	0.828	0.718	C2		DNMT3A	1788	6.95009e-55	-1.21544	0.084	0.329	C3
SLC52A2	79581	0.00016572	5.44252	0.962	0.834	C0		PSMD9	5715	4.22532e-249	5.94083	0.99	0.873	C1		AL441992.1		0.000158468	-2.03289	0.708	0.616	C2		ZNF398	57541	4.83182e-57	-1.21615	0.052	0.292	C3
MYO1C	4641	6.2454e-05	5.43444	0.8	0.715	C0		WASL	8976	1.66603e-163	5.93691	0.949	0.781	C1		ENDOV	284131	0.0027169	-2.05215	0.68	0.675	C2		SLC25A14	9016	1.70176e-82	-1.2175	0.063	0.376	C3
TMEM251	26175	0.00769656	5.41832	0.589	0.585	C0		ZCCHC17	51538	3.9059e-148	5.92316	0.835	0.58	C1		MCM10	55388	2.25065e-17	-2.05807	0.363	0.229	C2		NHS	4810	6.7547e-59	-1.21806	0.051	0.297	C3
VPS25	84313	8.22057e-06	5.41226	0.78	0.66	C0		JKAMP	51528	1.38624e-168	5.92273	0.938	0.753	C1		GAREM1	64762	1.23363e-06	-2.05911	0.318	0.383	C2		ARMC6	93436	4.59172e-78	-1.21818	0.05	0.349	C3
ANKRD13A	88455	1.67414e-05	5.40241	0.453	0.406	C0		RFNG	5986	2.21095e-53	5.92078	0.737	0.565	C1		RTCB	51493	3.65428e-05	-2.06052	0.877	0.78	C2		IRX5	10265	1.22141e-62	-1.21973	0.043	0.297	C3
CCDC47	57003	0.00212094	5.39299	0.89	0.828	C0		ZFP91	80829	1.46659e-290	5.91812	0.941	0.673	C1		SLC22A18	5002	6.36864e-21	-2.06242	0.506	0.605	C2		LRRC8B	23507	8.13249e-67	-1.22057	0.082	0.359	C3
EFNA1	1942	2.62719e-33	5.39233	0.472	0.339	C0		CHD4	1108	2.05266e-168	5.90892	0.968	0.826	C1		UCHL5	51377	3.14755e-13	-2.06321	0.816	0.695	C2		ABITRAM	54942	1.78752e-72	-1.22126	0.077	0.368	C3
FOXA1	3169	1.24224e-06	5.35594	0.534	0.483	C0		GALNT10	55568	1.98395e-99	5.90833	0.866	0.663	C1		COPS3	8533	9.02805e-06	-2.06899	0.917	0.811	C2		FAM8A1	51439	1.12425e-52	-1.22142	0.061	0.291	C3
UBE2E1	7324	1.29403e-05	5.35122	0.617	0.553	C0		RNASEH2B	79621	0	5.9051	0.895	0.485	C1		GULP1	51454	1.99899e-07	-2.07055	0.306	0.375	C2		MARVELD3	91862	2.10906e-65	-1.22171	0.066	0.333	C3
TAPBP	6892	2.026e-38	5.34595	0.781	0.64	C0		CTDSPL	10217	1.14448e-189	5.90301	0.945	0.748	C1		ZDHHC20	253832	0.000786126	-2.07255	0.487	0.421	C2		MAP3K9	4293	1.85456e-46	-1.22179	0.053	0.261	C3
CLINT1	9685	5.47892e-19	5.34216	0.877	0.773	C0		ASS1	445	1.71521e-112	5.89936	0.99	0.881	C1		MRPL16	54948	0.0055258	-2.07371	0.81	0.736	C2		DTWD1	56986	2.76688e-75	-1.22185	0.075	0.374	C3
MAP2K3	5606	4.50199e-09	5.34064	0.828	0.727	C0		MDFIC	29969	1.68659e-145	5.88079	0.868	0.639	C1		KITLG	4254	4.16184e-06	-2.08395	0.324	0.382	C2		ZNF414	84330	1.21273e-82	-1.22201	0.06	0.371	C3
RDH11	51109	7.65808e-44	5.322	0.893	0.751	C0		SNRNP200	23020	3.84081e-201	5.86253	0.985	0.831	C1		NAP1L4	4676	0.000100324	-2.08554	0.765	0.687	C2		CTDSPL2	51496	1.88124e-68	-1.22265	0.064	0.338	C3
PPP4R2	151987	0.00638514	5.31683	0.702	0.668	C0		MAP3K1	4214	2.353e-79	5.85961	0.807	0.633	C1		CCDC90B	60492	0.00201584	-2.0885	0.694	0.68	C2		KIFC2	90990	7.23756e-68	-1.22314	0.059	0.33	C3
BIRC2	329	4.05322e-06	5.29398	0.616	0.552	C0		ZNF146	7705	3.73214e-109	5.85572	0.682	0.425	C1		FAM174A	345757	1.3331e-10	-2.09106	0.596	0.64	C2		INPP5K	51763	2.23388e-63	-1.2247	0.079	0.345	C3
SPRY4	81848	4.53891e-22	5.27877	0.632	0.525	C0		SLC25A10	1468	1.89765e-298	5.85189	0.844	0.463	C1		SHISA4	149345	5.00403e-05	-2.09228	0.446	0.485	C2		ZNF516	9658	7.26281e-58	-1.22479	0.095	0.349	C3
SUSD2	56241	5.37518e-05	5.27313	0.317	0.276	C0		SDHA	6389	4.36e-292	5.85157	0.994	0.839	C1		STMN3	50861	0.000799133	-2.09629	0.44	0.48	C2		LATS1	9113	4.87692e-67	-1.2249	0.054	0.323	C3
FASTK	10922	1.04971e-17	5.26687	0.881	0.762	C0		LEPROTL1	23484	1.49326e-152	5.83824	0.978	0.836	C1		PLD3	23646	2.26546e-05	-2.10027	0.507	0.538	C2		SNX1	6642	2.18614e-75	-1.22521	0.109	0.41	C3
SDSL	113675	7.96964e-15	5.26381	0.376	0.29	C0		MBNL1	4154	9.77879e-267	5.83172	0.97	0.776	C1		NMRAL1	57407	1.43609e-05	-2.10071	0.608	0.627	C2		WASHC2C	253725	2.16751e-60	-1.22673	0.085	0.343	C3
SLC9A3R2	9351	6.98424e-32	5.25351	0.78	0.649	C0		ZDHHC12	84885	0	5.813	0.987	0.782	C1		FAM204A	63877	3.69888e-05	-2.10387	0.754	0.673	C2		FTSJ3	117246	1.07119e-80	-1.22685	0.069	0.38	C3
HHIPL2	79802	2.21823e-21	5.23834	0.639	0.528	C0		SIGIRR	59307	2.19672e-185	5.81102	0.827	0.522	C1		BRCA2	675	4.18449e-41	-2.10641	0.498	0.28	C2		FBXO38	81545	5.92364e-75	-1.22696	0.07	0.364	C3
PPARG	5468	2.45385e-18	5.17961	0.615	0.516	C0		ABCA7	10347	5.331e-53	5.79363	0.361	0.194	C1		RAB31	11031	0.000264065	-2.10713	0.51	0.54	C2		ACTR1B	10120	1.17315e-72	-1.22738	0.09	0.385	C3
SIRT1	23411	3.73866e-05	5.17094	0.216	0.253	C0		HAX1	10456	1.36084e-208	5.79017	0.987	0.856	C1		SLC35F2	54733	0.00476039	-2.11446	0.492	0.506	C2		MTX3	345778	2.66688e-66	-1.22781	0.069	0.341	C3
BMP7	655	3.4042e-10	5.17044	0.38	0.312	C0		CUL1	8454	7.86871e-250	5.78461	0.928	0.681	C1		USE1	55850	0.000272033	-2.12455	0.529	0.558	C2		TPP2	7174	4.59816e-73	-1.2293	0.104	0.399	C3
C4orf3	401152	1.34895e-23	5.16905	0.962	0.86	C0		PIN1	5300	0	5.7828	0.974	0.75	C1		ACOX1	51	0.000162184	-2.1278	0.467	0.5	C2		HELZ2	85441	3.67701e-55	-1.22976	0.061	0.296	C3
EPHA4	2043	4.7059e-72	5.14878	0.708	0.534	C0		TXNDC9	10190	2.21617e-203	5.78206	0.981	0.83	C1		DEPDC1B	55789	3.26801e-45	-2.129	0.361	0.176	C2		SRPRA	6734	1.81361e-70	-1.23075	0.117	0.411	C3
SLC44A1	23446	1.08708e-30	5.14112	0.907	0.787	C0		CNIH1	10175	1.9596e-283	5.77822	0.993	0.857	C1		NCSTN	23385	1.32051e-13	-2.13476	0.525	0.583	C2		ORC2	4999	1.45338e-70	-1.23159	0.092	0.38	C3
RALGAPA2	57186	8.14692e-15	5.12525	0.567	0.47	C0		PPP1R7	5510	1.72843e-234	5.77272	0.993	0.862	C1		ABHD17C	58489	0.00316901	-2.14078	0.742	0.722	C2		MAML1	9794	1.6654e-81	-1.23308	0.072	0.385	C3
MAGED2	10916	3.88506e-96	5.10224	0.701	0.482	C0		MRPL35	51318	2.74253e-231	5.77206	0.902	0.622	C1		CMC4	100272147	0.00332686	-2.14229	0.646	0.575	C2		WDHD1	11169	3.09604e-46	-1.23377	0.062	0.27	C3
BHLHE41	79365	2.37652e-37	5.08934	0.765	0.635	C0		PSRC1	84722	2.47005e-293	5.76981	0.467	0.095	C1		MYO6	4646	0.000429228	-2.14704	0.653	0.647	C2		PCNT	5116	1.23221e-34	-1.23408	0.081	0.258	C3
STARD4	134429	2.58084e-18	5.0877	0.251	0.169	C0		PIM3	415116	9.86209e-167	5.76235	0.817	0.551	C1		ACBD6	84320	0.00901092	-2.14989	0.701	0.64	C2		WDR59	79726	8.82526e-78	-1.23474	0.062	0.364	C3
GABRE	2564	1.56182e-71	5.06817	0.505	0.309	C0		MIR205HG	642587	6.49494e-135	5.75699	0.977	0.839	C1		MCUB	55013	5.68083e-13	-2.15025	0.755	0.618	C2		FAM168A	23201	1.70344e-69	-1.23588	0.069	0.349	C3
GLS	2744	0.000100266	5.06027	0.335	0.372	C0		PLIN3	10226	2.25648e-35	5.75061	0.88	0.754	C1		SAP30	8819	1.19329e-07	-2.15558	0.31	0.23	C2		LDLRAP1	26119	1.1464e-78	-1.23652	0.059	0.361	C3
MRPL39	54148	2.78977e-17	5.01452	0.388	0.459	C0		TSTA3	7264	2.80238e-172	5.74085	0.992	0.866	C1		FADS2	9415	0.00888733	-2.15843	0.222	0.252	C2		SAMD8	142891	5.44441e-73	-1.23814	0.063	0.351	C3
POLDIP2	26073	0.000236163	5.00291	0.87	0.769	C0		CTCF	10664	0	5.73651	0.881	0.53	C1		SKAP2	8935	0.000503569	-2.16651	0.625	0.626	C2		EXOSC2	23404	1.11089e-78	-1.23827	0.047	0.346	C3
CORO1B	57175	3.81587e-107	4.99895	0.953	0.792	C0		GORASP2	26003	2.42804e-158	5.71981	0.942	0.743	C1		ARRB1	408	8.12776e-11	-2.18421	0.389	0.467	C2		ZNF451	26036	7.62475e-86	-1.23839	0.055	0.375	C3
CRAT	1384	0.00040769	4.96931	0.487	0.441	C0		LYPD6B	130576	5.64006e-69	5.71237	0.883	0.723	C1		DIP2B	57609	3.66772e-06	-2.18485	0.452	0.501	C2		IFT81	28981	2.45794e-68	-1.2397	0.101	0.386	C3
FOXD1	2297	6.71079e-08	4.95985	0.291	0.354	C0		KIF4A	24137	1.6719e-301	5.70791	0.65	0.203	C1		SERTAD4	56256	6.5022e-05	-2.18662	0.57	0.483	C2		TMEM30B	161291	1.3423e-72	-1.23974	0.062	0.349	C3
TFRC	7037	7.98564e-08	4.95067	0.705	0.699	C0		IMPDH2	3615	1.18233e-273	5.7007	0.972	0.777	C1		NETO2	81831	0.000353067	-2.18938	0.451	0.369	C2		DNAJC11	55735	2.3415e-60	-1.23993	0.082	0.341	C3
WWC1	23286	1.76683e-07	4.94982	0.625	0.552	C0		COPS3	8533	0	5.70052	0.988	0.778	C1		FNDC3A	22862	1.74535e-13	-2.19527	0.28	0.381	C2		TRIM41	90933	1.07737e-75	-1.2403	0.089	0.391	C3
SHMT1	6470	3.62029e-27	4.91972	0.709	0.715	C0		TMEM38B	55151	0	5.6921	0.906	0.522	C1		TRIQK	286144	4.10503e-19	-2.19927	0.414	0.521	C2		TRIM4	89122	4.95385e-73	-1.24091	0.094	0.389	C3
PTK6	5753	5.18694e-69	4.90493	0.497	0.307	C0		CIAO1	9391	5.83588e-270	5.6911	0.987	0.819	C1		PRRG2	5639	0.00154306	-2.20121	0.327	0.371	C2		STRN4	29888	6.24981e-75	-1.24115	0.077	0.372	C3
ARFIP1	27236	3.17688e-06	4.86975	0.721	0.642	C0		NCBP2	22916	8.97698e-134	5.6693	0.94	0.771	C1		TMEM135	65084	1.9223e-20	-2.20265	0.32	0.44	C2		RNF26	79102	7.60369e-46	-1.24205	0.062	0.269	C3
ATP6V1A	523	7.55865e-14	4.85746	0.795	0.689	C0		PSMB4	5692	3.96874e-177	5.66852	0.983	0.841	C1		LRBA	987	8.78503e-05	-2.20366	0.513	0.536	C2		ELF4	2000	3.9972e-49	-1.24264	0.062	0.281	C3
EGR3	1960	4.63556e-51	4.84882	0.271	0.134	C0		RNF217	154214	3.11618e-25	5.66535	0.349	0.231	C1		TBC1D20	128637	0.000159173	-2.20616	0.579	0.586	C2		ZNF274	10782	5.64827e-55	-1.24307	0.055	0.291	C3
RALA	5898	7.18854e-11	4.83864	0.896	0.834	C0		TRIM11	81559	4.86356e-68	5.65062	0.69	0.485	C1		RCCD1	91433	2.82636e-11	-2.20915	0.478	0.359	C2		ECHDC2	55268	3.54006e-74	-1.2435	0.052	0.341	C3
SMAGP	57228	6.137e-28	4.83818	0.735	0.611	C0		POLE3	54107	0	5.64809	0.942	0.613	C1		TMA16	55319	0.00169241	-2.21142	0.704	0.617	C2		AASDH	132949	2.57408e-85	-1.2449	0.052	0.37	C3
MCRIP1	348262	2.55271e-22	4.79224	0.745	0.61	C0		EIF4EBP2	1979	0	5.62845	0.947	0.691	C1		HYI	81888	3.35209e-05	-2.21147	0.531	0.564	C2		NRSN2-AS1	100507459	8.25457e-70	-1.24496	0.088	0.376	C3
MLX	6945	5.19674e-06	4.78755	0.798	0.699	C0		PTGES2	80142	8.93839e-258	5.62797	0.978	0.795	C1		PTPA	5524	0.000909693	-2.22272	0.635	0.636	C2		CCDC24	149473	8.79499e-84	-1.24553	0.061	0.376	C3
NADK	65220	1.02561e-14	4.77926	0.497	0.417	C0		SLCO3A1	28232	1.62055e-119	5.62463	0.767	0.501	C1		POP5	51367	0.00328175	-2.22368	0.763	0.69	C2		RBP1	5947	7.03461e-52	-1.2461	0.046	0.266	C3
TENT5A	55603	2.2388e-25	4.77872	0.386	0.278	C0		RFC1	5981	0	5.6198	0.943	0.685	C1		TLE2	7089	5.09082e-09	-2.23675	0.368	0.437	C2		JADE2	23338	1.03463e-56	-1.24685	0.065	0.308	C3
BID	637	1.71834e-12	4.76824	0.917	0.784	C0		RNH1	6050	3.60421e-230	5.61744	0.997	0.882	C1		FNBP4	23360	0.00215607	-2.23817	0.701	0.63	C2		DLST	1743	1.13778e-70	-1.24792	0.08	0.366	C3
TMEM208	29100	2.92417e-33	4.76389	0.981	0.864	C0		CLDN9	9080	3.42343e-57	5.61688	0.782	0.605	C1		ELF1	1997	1.80586e-08	-2.23943	0.635	0.668	C2		RFX1	5989	3.25469e-76	-1.24863	0.075	0.378	C3
ECH1	1891	4.29627e-22	4.74802	0.973	0.869	C0		BCL7C	9274	1.65718e-303	5.61315	0.955	0.699	C1		SS18L2	51188	0.0012866	-2.24215	0.761	0.699	C2		MYNN	55892	1.79147e-80	-1.24898	0.078	0.39	C3
CLIP4	79745	5.93892e-20	4.72105	0.607	0.497	C0		CCDC14	64770	0	5.61148	0.81	0.381	C1		YDJC	150223	3.63189e-05	-2.25525	0.725	0.63	C2		PRMT7	54496	1.44403e-79	-1.24911	0.053	0.356	C3
SLC31A1	1317	1.12649e-06	4.71686	0.556	0.494	C0		RNF187	149603	4.15122e-141	5.6101	0.978	0.815	C1		SMAD5	4090	0.000827302	-2.25573	0.774	0.753	C2		ENTPD3-AS1	285266	2.81635e-78	-1.24939	0.063	0.364	C3
SEC16A	9919	3.27338e-10	4.71659	0.492	0.413	C0		ESCO2	157570	0	5.59895	0.639	0.082	C1		GRK2	156	5.64993e-05	-2.25976	0.554	0.58	C2		SMPDL3A	10924	8.50044e-73	-1.25016	0.06	0.346	C3
TRAPPC1	58485	4.5865e-12	4.70348	0.992	0.894	C0		BAZ1A	11177	0	5.59306	0.961	0.691	C1		PDPK1	5170	0.00113906	-2.26398	0.584	0.584	C2		CYB5B	80777	7.02433e-88	-1.25054	0.044	0.366	C3
YTHDF1	54915	5.6974e-05	4.70124	0.692	0.61	C0		QSER1	79832	8.86718e-299	5.58858	0.897	0.569	C1		SEZ6L2	26470	6.97923e-06	-2.26833	0.439	0.48	C2		PDE4DIP	9659	4.66541e-47	-1.25162	0.073	0.289	C3
PPME1	51400	0.000237026	4.69304	0.62	0.552	C0		ADNP	23394	9.6955e-178	5.58617	0.942	0.761	C1		PIK3R2	5296	4.9869e-05	-2.27426	0.559	0.58	C2		RCOR3	55758	2.56446e-84	-1.25216	0.065	0.382	C3
TMEM158	25907	2.3548e-15	4.67368	0.399	0.475	C0		KEAP1	9817	1.09927e-252	5.5786	0.885	0.572	C1		PNPLA2	57104	0.00055766	-2.27989	0.487	0.517	C2		DHX38	9785	2.38182e-64	-1.25297	0.077	0.345	C3
SCARB2	950	6.07625e-38	4.66708	0.839	0.708	C0		TIPIN	54962	0	5.57525	0.757	0.307	C1		GLOD4	51031	0.00294832	-2.28053	0.878	0.783	C2		ZMYM3	9203	3.15402e-66	-1.25309	0.077	0.349	C3
SPAG9	9043	0.00988137	4.66605	0.67	0.618	C0		GATA2	2624	6.93137e-64	5.56751	0.727	0.542	C1		RYK	6259	0.00248544	-2.28777	0.837	0.758	C2		ARHGEF28	64283	6.47632e-81	-1.25364	0.063	0.371	C3
SLC27A4	10999	8.97801e-31	4.65283	0.477	0.353	C0		DDRGK1	65992	2.50434e-287	5.55143	0.998	0.876	C1		BICD1	636	5.06195e-09	-2.28851	0.541	0.59	C2		SLC39A13	91252	1.53071e-81	-1.25378	0.075	0.391	C3
MKLN1	4289	4.0367e-08	4.64471	0.625	0.542	C0		LRRC26	389816	1.05416e-275	5.5493	0.906	0.561	C1		ZFAND3	60685	1.79009e-08	-2.29214	0.522	0.569	C2		SH3TC2	79628	2.77119e-55	-1.25412	0.061	0.298	C3
DHRS4L2	317749	1.21083e-56	4.64364	0.809	0.652	C0		SEMA3C	10512	1.04807e-30	5.54916	0.498	0.354	C1		AHCYL2	23382	8.91732e-10	-2.29635	0.257	0.33	C2		ATG16L1	55054	2.24632e-73	-1.25456	0.064	0.352	C3
CDC42BPA	8476	4.13013e-05	4.64015	0.666	0.612	C0		G3BP2	9908	2.7657e-202	5.54395	0.949	0.758	C1		DALRD3	55152	0.000451238	-2.2967	0.597	0.608	C2		SPEN	23013	2.39656e-65	-1.25459	0.101	0.378	C3
TNFRSF12A	51330	2.83651e-11	4.62876	0.995	0.915	C0		STK35	140901	1.1486e-110	5.52808	0.691	0.433	C1		IFRD2	7866	1.52575e-05	-2.29781	0.726	0.618	C2		AL133453.1		7.22116e-64	-1.25477	0.047	0.307	C3
USP16	10600	0.00223735	4.61646	0.71	0.672	C0		CPPED1	55313	1.60933e-121	5.52242	0.808	0.565	C1		SLC29A2	3177	1.34969e-11	-2.30026	0.474	0.545	C2		METTL3	56339	5.66014e-81	-1.25496	0.047	0.352	C3
TSTD1	100131187	5.16691e-67	4.61173	0.954	0.836	C0		NUP155	9631	0	5.51084	0.904	0.534	C1		PLXNA1	5361	2.39966e-07	-2.31442	0.397	0.456	C2		TBC1D10A	83874	4.36253e-87	-1.25521	0.066	0.391	C3
FAM91A1	157769	0.00603434	4.60436	0.72	0.679	C0		SLC9A3R1	9368	1.57217e-135	5.50678	0.926	0.746	C1		IGSF8	93185	5.13141e-17	-2.31812	0.425	0.529	C2		RNF135	84282	7.10892e-73	-1.256	0.085	0.378	C3
CDKN2D	1032	2.1187e-148	4.60418	0.205	0.459	C0		SS18L2	51188	1.06114e-240	5.49928	0.914	0.643	C1		SGO1	151648	1.68264e-19	-2.32425	0.346	0.211	C2		SHFL	55337	7.58999e-71	-1.25653	0.055	0.338	C3
MT-ATP8	4509	1.13404e-13	4.60326	0.703	0.599	C0		ZFPM1	161882	1.54295e-21	5.49046	0.655	0.547	C1		HNRNPUL2	221092	6.15018e-06	-2.32975	0.687	0.606	C2		YTHDC2	64848	2.86212e-95	-1.25777	0.072	0.419	C3
COTL1	23406	4.42334e-05	4.60249	0.981	0.903	C0		APPL1	26060	1.00897e-192	5.4893	0.895	0.625	C1		MCM2	4171	1.28755e-21	-2.33769	0.509	0.338	C2		SLC15A4	121260	1.17628e-78	-1.25806	0.076	0.382	C3
VGLL1	51442	1.1771e-15	4.60244	0.945	0.839	C0		EPPK1	83481	1.09233e-72	5.48271	0.684	0.475	C1		ELOVL5	60481	0.000183118	-2.34405	0.466	0.494	C2		PAPSS1	9061	2.69004e-72	-1.25872	0.076	0.364	C3
ASPH	444	0.00747037	4.6023	0.989	0.933	C0		IARS2	55699	3.32407e-160	5.47715	0.973	0.822	C1		MYO19	80179	0.00304731	-2.34476	0.534	0.463	C2		NSUN4	387338	1.95308e-73	-1.25921	0.074	0.366	C3
LAD1	3898	9.52959e-15	4.60213	0.907	0.803	C0		NDUFAF4	29078	4.022e-235	5.47564	0.93	0.71	C1		ADGRE5	976	2.58497e-09	-2.3468	0.446	0.351	C2		INO80D	54891	8.86879e-65	-1.25935	0.078	0.347	C3
GTF2A2	2958	1.37295e-23	4.60194	0.918	0.839	C0		CPNE3	8895	2.65827e-152	5.47081	0.975	0.856	C1		DPP7	29952	2.79632e-06	-2.34713	0.739	0.733	C2		MRE11	4361	3.54476e-75	-1.2609	0.075	0.371	C3
LMAN1	3998	1.9789e-05	4.59758	0.943	0.843	C0		GEMIN6	79833	7.26577e-236	5.47011	0.852	0.537	C1		MRPS18B	28973	2.18606e-06	-2.35099	0.806	0.703	C2		TAF1	6872	3.653e-73	-1.26091	0.079	0.373	C3
AIG1	51390	3.26772e-07	4.59037	0.87	0.762	C0		HIKESHI	51501	4.68166e-215	5.46435	0.939	0.728	C1		NET1	10276	0.00308623	-2.35839	0.685	0.606	C2		ADGRF4	221393	1.68383e-58	-1.2612	0.055	0.301	C3
EIF5A2	56648	2.07888e-12	4.58915	0.397	0.461	C0		GPR180	160897	2.31182e-119	5.46121	0.57	0.293	C1		GPR107	57720	0.00423776	-2.36649	0.504	0.518	C2		ZFC3H1	196441	6.61064e-74	-1.26129	0.077	0.371	C3
DGUOK	1716	0.00208307	4.58136	0.983	0.888	C0		ADAM9	8754	8.67661e-111	5.44916	0.935	0.761	C1		FAM13A	10144	4.82089e-11	-2.36782	0.219	0.306	C2		MAPRE3	22924	1.14014e-65	-1.26358	0.064	0.332	C3
HSCB	150274	8.39688e-06	4.57976	0.37	0.318	C0		FAM89B	23625	3.2842e-110	5.44823	0.898	0.697	C1		ABLIM3	22885	9.99781e-06	-2.36911	0.435	0.475	C2		HTRA2	27429	5.06045e-78	-1.26493	0.061	0.361	C3
DCAF13	25879	0.0081115	4.57702	0.929	0.814	C0		POM121C	100101267	3.99391e-136	5.43138	0.788	0.517	C1		CDC23	8697	0.00101252	-2.37024	0.62	0.551	C2		RTN2	6253	9.22228e-78	-1.26508	0.048	0.345	C3
AP001528.1		2.5731e-34	4.57418	0.515	0.385	C0		CACYBP	27101	0	5.42157	0.996	0.839	C1		SNHG4	724102	2.21796e-20	-2.37089	0.27	0.161	C2		VPS13B-DT	105375666	3.46223e-54	-1.26511	0.065	0.301	C3
PGD	5226	0.000146223	4.56849	0.965	0.868	C0		PPP6R3	55291	2.00109e-171	5.42098	0.91	0.685	C1		TMEM185A	84548	0.00055196	-2.37119	0.375	0.416	C2		SAMD4A	23034	1.56669e-49	-1.26538	0.045	0.259	C3
CAPS	828	1.41219e-38	4.56519	0.904	0.771	C0		NBN	4683	4.3296e-137	5.41672	0.857	0.612	C1		TRIO	7204	0.00630591	-2.37424	0.526	0.539	C2		SH3BP5	9467	8.15641e-61	-1.26704	0.078	0.337	C3
ETV5	2119	1.21265e-32	4.56082	0.611	0.673	C0		ARL8B	55207	3.61133e-82	5.41057	0.881	0.698	C1		DCTN4	51164	0.00655312	-2.37529	0.524	0.54	C2		CCHCR1	54535	4.26404e-72	-1.26783	0.038	0.316	C3
VDAC1	7416	2.45084e-17	4.55922	0.998	0.94	C0		G2E3	55632	2.5841e-192	5.40246	0.62	0.284	C1		CDC25C	995	4.86127e-46	-2.38667	0.37	0.18	C2		DLL3	10683	8.76813e-64	-1.26803	0.075	0.341	C3
C4orf48	401115	8.85415e-29	4.54921	0.973	0.859	C0		UHRF1	29128	0	5.40091	0.685	0.169	C1		TMEM38A	79041	1.66883e-09	-2.39026	0.27	0.348	C2		SLC2A11	66035	4.54395e-71	-1.26821	0.068	0.35	C3
DARS	1615	0.000514253	4.54918	0.903	0.819	C0		PPP2R5E	5529	4.4758e-160	5.40066	0.912	0.706	C1		CREG1	8804	5.42703e-05	-2.39436	0.569	0.599	C2		BBIP1	92482	8.89878e-77	-1.26922	0.072	0.371	C3
PTPN11	5781	0.00144279	4.54187	0.833	0.78	C0		ETFA	2108	1.37625e-226	5.39717	1	0.919	C1		SNX4	8723	4.3973e-08	-2.39741	0.607	0.654	C2		EXOC1	55763	5.33782e-83	-1.27031	0.088	0.407	C3
CNGA1	1259	2.61927e-39	4.53977	0.41	0.274	C0		STK3	6788	4.3149e-155	5.39625	0.877	0.644	C1		C2orf76	130355	0.00100842	-2.40435	0.669	0.651	C2		PTPN6	5777	1.24886e-91	-1.27035	0.064	0.399	C3
RAB38	23682	6.11091e-08	4.53864	0.711	0.625	C0		HSPBP1	23640	1.62372e-183	5.38649	0.872	0.6	C1		CDC27	996	0.0007483	-2.40873	0.687	0.595	C2		SCRN3	79634	7.61075e-93	-1.27082	0.067	0.406	C3
ABHD14B	84836	2.05857e-14	4.534	0.726	0.619	C0		ASF1B	55723	0	5.37619	0.835	0.179	C1		KHSRP	8570	0.000230289	-2.40935	0.703	0.634	C2		PPARA	5465	2.39183e-68	-1.27146	0.068	0.346	C3
GTF2F2	2963	2.04098e-07	4.52003	0.833	0.745	C0		HNRNPK	3190	0	5.36744	1	0.944	C1		SLC35F3	148641	3.11038e-07	-2.40943	0.287	0.355	C2		TTC5	91875	1.18811e-90	-1.27216	0.055	0.386	C3
SERINC5	256987	1.5599e-31	4.51572	0.787	0.661	C0		MRPL50	54534	3.05867e-230	5.35417	0.945	0.697	C1		FAF1	11124	0.00460559	-2.41215	0.73	0.643	C2		HERPUD2	64224	1.1144e-67	-1.27341	0.091	0.373	C3
GNS	2799	6.59216e-22	4.50803	0.71	0.604	C0		ZNF22	7570	5.29499e-253	5.35041	0.904	0.605	C1		CDK5	1020	3.38486e-08	-2.41351	0.73	0.734	C2		C5orf22	55322	1.93613e-89	-1.27345	0.086	0.42	C3
GOSR2	9570	0.000392161	4.50481	0.541	0.486	C0		YTHDF2	51441	3.73067e-218	5.34351	0.976	0.785	C1		ECI2	10455	0.000263539	-2.42774	0.69	0.61	C2		CCDC9B	388115	2.25916e-46	-1.27462	0.064	0.275	C3
SOAT1	6646	3.70204e-09	4.50301	0.222	0.279	C0		MKNK1	8569	1.39004e-150	5.34165	0.855	0.621	C1		AHR	196	0.000500241	-2.4298	0.711	0.633	C2		NAA40	79829	2.71023e-78	-1.27463	0.094	0.403	C3
TRIP11	9321	0.00014302	4.49349	0.59	0.532	C0		NOP58	51602	1.35314e-240	5.33406	0.923	0.665	C1		SIAH2	6478	1.16572e-05	-2.4305	0.55	0.574	C2		TLN1	7094	6.14711e-65	-1.27469	0.125	0.405	C3
CDC5L	988	1.29334e-19	4.48508	0.758	0.738	C0		THOC6	79228	1.19971e-198	5.32759	0.823	0.53	C1		GRAMD1A	57655	0.000816309	-2.43213	0.546	0.563	C2		KDF1	126695	7.84114e-75	-1.27696	0.061	0.354	C3
CUTA	51596	0.00518438	4.48033	0.925	0.818	C0		MFF	56947	1.55999e-252	5.32751	0.979	0.816	C1		UHRF1	29128	1.17523e-15	-2.43777	0.402	0.274	C2		BANP	54971	1.16998e-67	-1.27699	0.068	0.342	C3
AC012146.1		3.02678e-17	4.47924	0.228	0.313	C0		ZBTB7A	51341	5.72267e-82	5.32329	0.909	0.75	C1		ARFGEF3	57221	0.000227319	-2.43952	0.491	0.527	C2		NSMF	26012	4.64956e-74	-1.27732	0.074	0.367	C3
EIF1B	10289	0.000152871	4.46709	0.802	0.732	C0		UQCRC1	7384	2.92701e-237	5.31905	0.986	0.819	C1		CEP57	9702	6.62825e-06	-2.43967	0.602	0.503	C2		MBTPS2	51360	1.17558e-77	-1.27734	0.085	0.392	C3
YIPF6	286451	3.29503e-07	4.4621	0.898	0.787	C0		POP5	51367	1.9922e-192	5.3189	0.891	0.641	C1		TC2N	123036	8.63774e-10	-2.44197	0.478	0.544	C2		RBM5	10181	3.85092e-88	-1.27736	0.075	0.404	C3
RBM8A	9939	2.22615e-33	4.45722	0.995	0.905	C0		CHML	1122	1.27743e-147	5.30935	0.781	0.505	C1		BACE2	25825	0.00173242	-2.44267	0.498	0.52	C2		NFE2L1	4779	1.87722e-67	-1.27748	0.09	0.371	C3
ZC3H12A	80149	2.67136e-18	4.44668	0.341	0.251	C0		RBMX	27316	0	5.30622	0.991	0.776	C1		CAMK2D	817	9.47501e-25	-2.45566	0.294	0.439	C2		EXOC2	55770	2.54696e-74	-1.27773	0.083	0.379	C3
ARL5A	26225	3.04796e-05	4.44424	0.876	0.765	C0		HADH	3033	0	5.30317	0.882	0.51	C1		INPP4B	8821	1.17741e-24	-2.46413	0.235	0.377	C2		ZNF358	140467	2.12507e-64	-1.27791	0.088	0.358	C3
AGO2	27161	2.63479e-34	4.44295	0.785	0.778	C0		INTS3	65123	1.46025e-59	5.30155	0.535	0.33	C1		PHF5A	84844	0.0044468	-2.46837	0.709	0.633	C2		BBS2	583	4.71621e-79	-1.27895	0.084	0.393	C3
ABCC5	10057	1.40671e-16	4.44269	0.712	0.616	C0		KXD1	79036	2.4227e-210	5.30084	0.9	0.647	C1		DCTD	1635	0.00506206	-2.47246	0.646	0.644	C2		LINC01833	107985879	7.82966e-61	-1.27922	0.046	0.295	C3
C8orf33	65265	1.61475e-07	4.44027	0.702	0.688	C0		MCUB	55013	0	5.28756	0.917	0.552	C1		OSBPL1A	114876	2.09881e-06	-2.47424	0.51	0.559	C2		FSTL5	56884	8.85013e-81	-1.27969	0.054	0.361	C3
TMEM254	80195	2.91912e-06	4.4313	0.675	0.594	C0		GNL3	26354	8.08581e-169	5.28661	0.901	0.66	C1		EXOSC5	56915	0.000100019	-2.47666	0.682	0.592	C2		MFSD5	84975	2.35329e-68	-1.27978	0.075	0.353	C3
EEF1AKMT4	110599564	0.00706103	4.42566	0.702	0.676	C0		ALG5	29880	2.58636e-286	5.28472	0.952	0.686	C1		MSH6	2956	1.80235e-26	-2.47957	0.598	0.45	C2		B9D1	27077	4.51072e-72	-1.28045	0.072	0.36	C3
NOP16	51491	1.15004e-36	4.41777	0.653	0.698	C0		PXN	5829	4.34989e-94	5.27958	0.777	0.575	C1		BOP1	23246	2.38463e-06	-2.48066	0.776	0.666	C2		NT5DC3	51559	1.30983e-60	-1.28083	0.075	0.333	C3
RAB8A	4218	3.7358e-11	4.41602	0.839	0.782	C0		MRPS18C	51023	2.02032e-254	5.27225	0.978	0.83	C1		IBTK	25998	7.92595e-08	-2.4822	0.562	0.603	C2		TMEM222	84065	9.42708e-84	-1.28254	0.063	0.378	C3
HSD17B4	3295	9.31332e-30	4.41289	0.778	0.64	C0		MCRS1	10445	3.50176e-163	5.26518	0.9	0.678	C1		SLC35B1	10237	0.0038386	-2.48437	0.808	0.768	C2		ALDH7A1	501	5.63388e-78	-1.28298	0.062	0.365	C3
ANXA9	8416	4.59276e-25	4.41148	0.461	0.357	C0		PRIM1	5557	0	5.26405	0.771	0.207	C1		TRAF3IP1	26146	0.00434505	-2.48463	0.539	0.488	C2		HEATR3	55027	2.09529e-85	-1.28323	0.08	0.403	C3
AIP	9049	0.00951229	4.41113	0.891	0.772	C0		FOSB	2354	7.30415e-59	5.25707	0.619	0.427	C1		SLC38A10	124565	0.00922818	-2.48509	0.681	0.674	C2		PRUNE1	58497	2.13414e-55	-1.28437	0.077	0.319	C3
DCUN1D1	54165	0.000161852	4.41056	0.851	0.756	C0		MED30	90390	3.12321e-253	5.25449	0.886	0.596	C1		COMMD9	29099	0.00187215	-2.48902	0.719	0.65	C2		SMARCD1	6602	4.51519e-67	-1.28445	0.127	0.412	C3
ATP6V1F	9296	7.73002e-22	4.40291	0.998	0.92	C0		TM2D1	83941	7.29583e-158	5.25139	0.944	0.763	C1		SYT17	51760	1.16444e-20	-2.49882	0.312	0.44	C2		SH3PXD2B	285590	2.60943e-63	-1.28481	0.06	0.319	C3
PLEKHB2	55041	2.00171e-06	4.3985	0.805	0.716	C0		PLEKHA3	65977	5.95006e-173	5.24997	0.89	0.649	C1		VPS72	6944	3.27211e-07	-2.50254	0.596	0.637	C2		ACO1	48	8.31977e-70	-1.28499	0.089	0.375	C3
YIPF5	81555	3.54046e-31	4.39691	0.83	0.694	C0		UTP11	51118	1.24402e-222	5.24469	0.885	0.594	C1		COQ5	84274	5.21951e-08	-2.50438	0.629	0.53	C2		RHBDF1	64285	2.14632e-83	-1.28584	0.07	0.386	C3
HEXA	3073	1.02116e-18	4.36823	0.728	0.606	C0		PLEKHJ1	55111	1.77095e-281	5.23869	0.918	0.619	C1		HCFC1	3054	0.000133361	-2.51064	0.635	0.546	C2		COP1	64326	7.24487e-80	-1.28605	0.087	0.4	C3
ABCC3	8714	2.49428e-91	4.36605	0.955	0.841	C0		LPCAT2	54947	5.84868e-99	5.23297	0.791	0.563	C1		PCYOX1	51449	0.000403881	-2.51731	0.663	0.674	C2		DDX11	1663	7.12112e-52	-1.2874	0.073	0.304	C3
RPN2	6185	0.00540248	4.34969	0.988	0.892	C0		SMARCA5	8467	3.07785e-175	5.22941	0.937	0.735	C1		FEM1B	10116	2.76062e-05	-2.5179	0.35	0.402	C2		DYM	54808	1.24552e-71	-1.28861	0.067	0.352	C3
PGM2L1	283209	3.41726e-32	4.34228	0.27	0.16	C0		BCL9L	283149	1.40298e-34	5.2278	0.624	0.482	C1		ANKRD17	26057	0.000297913	-2.51802	0.498	0.525	C2		TRAPPC12	51112	1.5658e-87	-1.28876	0.073	0.401	C3
ZNF579	163033	3.69776e-29	4.3218	0.538	0.405	C0		BROX	148362	1.60998e-163	5.22698	0.955	0.784	C1		PRIM1	5557	1.28042e-12	-2.52555	0.462	0.321	C2		ANKS1A	23294	4.16326e-53	-1.28909	0.106	0.35	C3
RALB	5899	5.75776e-17	4.31693	0.887	0.792	C0		CIP2A	57650	0	5.22615	0.803	0.243	C1		ARSD	414	2.60333e-18	-2.53022	0.463	0.569	C2		CAB39L	81617	9.23719e-51	-1.28983	0.049	0.271	C3
C14orf119	55017	2.14166e-15	4.31282	0.876	0.749	C0		WDR61	80349	4.27048e-161	5.22609	0.906	0.688	C1		PEX13	5194	0.00957183	-2.53314	0.687	0.676	C2		TUBGCP3	10426	4.70091e-61	-1.28993	0.076	0.336	C3
TMEM150A	129303	1.8277e-142	4.30256	0.567	0.291	C0		TSN	7247	4.17289e-247	5.22608	0.972	0.795	C1		STAG1	10274	3.69924e-11	-2.54038	0.447	0.33	C2		CYP2J2	1573	1.28568e-50	-1.28999	0.058	0.279	C3
MRPS23	51649	0.00134754	4.30123	0.959	0.846	C0		CXXC5	51523	2.38799e-100	5.22409	0.945	0.788	C1		TADA3	10474	0.00541749	-2.54376	0.61	0.626	C2		IFI27L1	122509	5.4996e-69	-1.29011	0.082	0.364	C3
SEMA5A	9037	6.30766e-42	4.26979	0.479	0.341	C0		PAGR1	79447	0	5.21717	0.887	0.511	C1		RAB11FIP4	84440	0.000732374	-2.54936	0.386	0.416	C2		RABEP2	79874	2.76219e-88	-1.29131	0.068	0.397	C3
RAB3D	9545	1.49754e-61	4.26697	0.834	0.677	C0		WBP11	51729	0	5.21087	0.967	0.716	C1		ARHGAP12	94134	6.79428e-05	-2.55039	0.439	0.485	C2		ADCY3	109	2.01894e-58	-1.29169	0.073	0.323	C3
NDFIP2	54602	3.89702e-26	4.26568	0.784	0.661	C0		THEM6	51337	7.02002e-295	5.20892	0.948	0.69	C1		JPT2	90861	0.00268523	-2.55639	0.646	0.572	C2		TXNRD2	10587	1.30543e-79	-1.29231	0.059	0.363	C3
C6orf226	441150	1.07563e-21	4.26544	0.551	0.435	C0		ORAI1	84876	1.81622e-235	5.18972	0.858	0.538	C1		GRK6	2870	5.76549e-10	-2.56722	0.646	0.528	C2		GNB4	59345	2.56714e-68	-1.2929	0.082	0.361	C3
ARMC1	55156	4.32335e-12	4.23316	0.532	0.569	C0		PTOV1	53635	5.14131e-120	5.18854	0.924	0.76	C1		ZNF524	147807	1.16804e-11	-2.56855	0.586	0.622	C2		BCAM	4059	1.09337e-79	-1.29321	0.059	0.364	C3
NQO2	4835	1.06381e-16	4.233	0.637	0.656	C0		YLPM1	56252	1.51179e-187	5.18273	0.877	0.618	C1		TMEM87B	84910	2.37255e-05	-2.57366	0.616	0.638	C2		KCTD10	83892	9.17618e-67	-1.29356	0.096	0.375	C3
TAOK3	51347	2.57403e-17	4.22953	0.762	0.659	C0		CDCA5	113130	0	5.17724	0.842	0.147	C1		FBXO3	26273	0.000690477	-2.57498	0.649	0.651	C2		RCAN3	11123	3.2179e-72	-1.29391	0.088	0.379	C3
TMEM147	10430	3.66579e-08	4.22021	0.964	0.859	C0		MTHFD2L	441024	5.87665e-151	5.1701	0.828	0.559	C1		PTPN1	5770	0.00153617	-2.57735	0.684	0.69	C2		HDAC7	51564	1.16267e-68	-1.29403	0.089	0.372	C3
PDIA3	2923	3.66311e-24	4.21636	0.941	0.829	C0		AP3S1	1176	5.34761e-67	5.16813	0.836	0.674	C1		RAD51C	5889	6.34053e-19	-2.57977	0.728	0.556	C2		ADCK1	57143	2.18545e-76	-1.29433	0.084	0.388	C3
CEBPD	1052	1.01188e-40	4.21374	0.649	0.508	C0		C1GALT1C1	29071	3.09657e-171	5.16769	0.947	0.729	C1		G2E3	55632	4.80315e-05	-2.58301	0.426	0.354	C2		ALKBH4	54784	5.05373e-88	-1.29493	0.081	0.412	C3
PDCD7	10081	2.78851e-07	4.2076	0.44	0.485	C0		CSNK2A1	1457	1.69919e-198	5.16086	0.989	0.863	C1		SESTD1	91404	0.000211104	-2.58505	0.276	0.321	C2		SLC4A7	9497	6.50348e-54	-1.29521	0.072	0.309	C3
NCKAP1	10787	0.00182261	4.18806	0.951	0.861	C0		SMARCC1	6599	5.80873e-175	5.15845	0.858	0.615	C1		DEGS2	123099	2.02481e-06	-2.58643	0.219	0.277	C2		SOCS4	122809	2.20798e-67	-1.29589	0.116	0.402	C3
TM7SF2	7108	1.81604e-156	4.18171	0.882	0.687	C0		TMEM120A	83862	9.92569e-65	5.15561	0.82	0.654	C1		CRTAP	10491	0.00566301	-2.58949	0.704	0.683	C2		CDR2	1039	1.11466e-42	-1.29633	0.064	0.262	C3
YIPF4	84272	2.54891e-17	4.17794	0.879	0.753	C0		PDCD10	11235	1.10719e-282	5.15461	0.998	0.877	C1		SGPP1	81537	2.23869e-08	-2.59418	0.481	0.534	C2		CEP97	79598	2.91275e-76	-1.29752	0.058	0.353	C3
TSPAN2	10100	1.92448e-22	4.15031	0.289	0.39	C0		PYM1	84305	1.42963e-114	5.15352	0.924	0.772	C1		TMEM50B	757	0.00255507	-2.59802	0.366	0.399	C2		GLMP	112770	2.74865e-63	-1.29754	0.101	0.372	C3
CHST11	50515	1.83905e-16	4.14971	0.559	0.464	C0		RAD51C	5889	0	5.14676	0.89	0.487	C1		CDK12	51755	0.0011891	-2.60333	0.746	0.671	C2		VIPAS39	63894	2.56496e-79	-1.29833	0.065	0.369	C3
TYMP	1890	6.12865e-57	4.13198	0.738	0.568	C0		MYH9	4627	2.3419e-188	5.14027	0.974	0.815	C1		SLC7A5	8140	2.8789e-07	-2.60547	0.622	0.523	C2		RC3H1	149041	2.83921e-81	-1.29873	0.071	0.382	C3
HEBP1	50865	3.03992e-17	4.12653	0.948	0.864	C0		CCT7	10574	2.60293e-296	5.13546	0.996	0.862	C1		FNBP1L	54874	0.000103762	-2.60909	0.694	0.623	C2		UBQLN4	56893	1.10882e-63	-1.29927	0.057	0.317	C3
TRIM8	81603	7.33543e-07	4.12134	0.57	0.501	C0		STK25	10494	8.97437e-142	5.13111	0.903	0.687	C1		SDC3	9672	1.71448e-06	-2.61693	0.306	0.364	C2		FANCF	2188	1.60944e-86	-1.29989	0.077	0.401	C3
VPS37A	137492	1.55338e-06	4.08893	0.576	0.505	C0		DEPDC1B	55789	2.22294e-265	5.12434	0.489	0.116	C1		PABPN1	8106	6.50459e-08	-2.61865	0.863	0.751	C2		AZIN1-AS1	100506753	2.24772e-50	-1.30164	0.059	0.28	C3
SH3GLB1	51100	7.82968e-47	4.0796	0.882	0.742	C0		NAE1	8883	0	5.1218	0.988	0.788	C1		DENND11	57189	6.2682e-07	-2.61871	0.376	0.435	C2		TEDC1	283643	2.92446e-62	-1.30167	0.039	0.289	C3
TBC1D15	64786	1.02619e-14	4.07393	0.341	0.411	C0		RNF24	11237	1.20002e-147	5.1153	0.957	0.791	C1		SLC35A2	7355	1.03507e-08	-2.62145	0.602	0.632	C2		AAR2	25980	3.63828e-85	-1.30224	0.083	0.407	C3
SVIP	258010	3.59697e-24	4.06903	0.807	0.77	C0		CHORDC1	26973	6.71713e-191	5.11311	0.877	0.603	C1		PMEL	6490	0.0033569	-2.62209	0.369	0.396	C2		AC008443.1		2.82045e-67	-1.30226	0.072	0.347	C3
PSMC4	5704	0.000228725	4.06843	0.966	0.838	C0		UBE2V2	7336	0	5.10342	0.977	0.784	C1		PDRG1	81572	1.39879e-05	-2.62255	0.608	0.535	C2		PLAA	9373	6.80267e-78	-1.30266	0.073	0.377	C3
RAC2	5880	2.86479e-40	4.06497	0.742	0.595	C0		LIMS1	3987	0	5.10224	0.963	0.7	C1		PRRC1	133619	3.66466e-07	-2.63042	0.519	0.57	C2		TSC2	7249	4.41543e-85	-1.30342	0.063	0.381	C3
MTIF3	219402	5.10954e-11	4.03929	0.848	0.739	C0		WASHC3	51019	1.28812e-91	5.09866	0.757	0.532	C1		SDCCAG8	10806	8.42974e-12	-2.63055	0.442	0.515	C2		WRAP53	55135	1.4442e-73	-1.30384	0.046	0.331	C3
FAM207A	85395	2.10715e-06	4.03863	0.648	0.571	C0		HYLS1	219844	0	5.09656	0.644	0.156	C1		SNHG30	105371743	1.00407e-09	-2.63426	0.458	0.37	C2		DPY19L1	23333	1.54105e-54	-1.30408	0.039	0.266	C3
DDR1	780	3.30569e-19	4.03778	0.732	0.625	C0		SMARCB1	6598	7.88542e-179	5.09521	0.918	0.708	C1		TNKS1BP1	85456	6.31522e-12	-2.63661	0.618	0.664	C2		OAZ2	4947	5.14187e-86	-1.30687	0.073	0.398	C3
PCYT2	5833	4.31245e-45	4.03502	0.652	0.505	C0		RAB3GAP1	22930	3.74644e-57	5.07611	0.665	0.483	C1		QSER1	79832	7.16605e-11	-2.64487	0.759	0.627	C2		ENG	2022	1.02773e-75	-1.30696	0.051	0.343	C3
GFPT1	2673	7.92067e-13	4.01336	0.659	0.564	C0		CDC25C	995	1.62975e-230	5.0761	0.474	0.127	C1		PITPNA-AS1	100306951	2.17709e-06	-2.64511	0.716	0.613	C2		GPRC5D-AS1	100506314	1.69163e-76	-1.30842	0.062	0.358	C3
U62317.1		6.32077e-57	4.01307	0.428	0.261	C0		BRCA2	675	0	5.05663	0.738	0.18	C1		FOXJ3	22887	1.15527e-09	-2.65141	0.404	0.472	C2		CERT1	10087	5.14727e-78	-1.30858	0.087	0.397	C3
PCNX3	399909	1.41585e-14	4.00364	0.724	0.619	C0		TRAF3	7187	2.31648e-149	5.04524	0.671	0.373	C1		DSN1	79980	3.44828e-09	-2.65538	0.489	0.378	C2		TJP3	27134	3.0464e-87	-1.30862	0.041	0.36	C3
CALCOCO2	10241	4.46443e-25	3.9847	0.823	0.705	C0		ANKH	56172	7.81902e-92	5.03669	0.791	0.566	C1		KCNG1	3755	6.62654e-08	-2.66007	0.25	0.317	C2		NDUFAF1	51103	8.88861e-89	-1.30895	0.058	0.384	C3
ZC3H8	84524	0.000152241	3.98068	0.351	0.383	C0		TMEM18	129787	2.35773e-199	5.02197	0.969	0.8	C1		ANAPC5	51433	6.55953e-06	-2.67095	0.827	0.728	C2		KANK2	25959	2.49724e-56	-1.31002	0.095	0.347	C3
PHACTR2	9749	0.0013401	3.97082	0.642	0.599	C0		UPF3A	65110	3.11158e-148	5.02125	0.868	0.641	C1		COMMD3	23412	0.00544048	-2.68026	0.659	0.643	C2		FRS2	10818	5.61031e-69	-1.31088	0.076	0.356	C3
EHD1	10938	8.25199e-26	3.95625	0.744	0.635	C0		APIP	51074	3.58953e-294	5.01707	0.976	0.807	C1		CYTH2	9266	1.68722e-07	-2.68919	0.574	0.595	C2		PARP4	143	2.00245e-80	-1.31234	0.087	0.399	C3
ARIH1	25820	1.49533e-06	3.91779	0.549	0.479	C0		SPIN1	10927	2.45458e-140	5.01151	0.813	0.553	C1		CUX1	1523	8.72361e-16	-2.69542	0.626	0.688	C2		XRCC1	7515	1.39096e-71	-1.31317	0.074	0.36	C3
ANAPC13	25847	0.000252068	3.9132	0.873	0.763	C0		ADGRE5	976	1.45524e-138	5.0103	0.582	0.297	C1		SMAD2	4087	0.00107054	-2.70103	0.713	0.699	C2		TBC1D13	54662	5.2801e-63	-1.31328	0.078	0.346	C3
TULP3	7289	0.00017898	3.91044	0.363	0.397	C0		SMIM19	114926	4.25424e-139	5.00858	0.883	0.676	C1		CD2BP2	10421	0.000779269	-2.71758	0.606	0.615	C2		RCHY1	25898	6.24796e-81	-1.31362	0.079	0.39	C3
NUTF2	10204	2.2498e-06	3.90643	0.989	0.891	C0		AL441992.1		2.39237e-194	5.00409	0.855	0.56	C1		SERPINB6	5269	0.00524324	-2.71911	0.822	0.756	C2		TTPAL	79183	1.11389e-52	-1.31447	0.08	0.316	C3
SPDEF	25803	2.80539e-92	3.90169	0.724	0.541	C0		PNKP	11284	3.0414e-188	4.9988	0.9	0.643	C1		NUP155	9631	1.96259e-12	-2.7194	0.735	0.602	C2		TTC39C	125488	1.56703e-78	-1.31457	0.088	0.397	C3
PRKAG1	5571	0.00134859	3.88453	0.728	0.638	C0		NUDT5	11164	0	4.99256	0.997	0.848	C1		RASAL2	9462	4.69789e-06	-2.71978	0.339	0.4	C2		DCAF11	80344	9.59465e-84	-1.31562	0.101	0.422	C3
MEF2D	4209	1.46817e-29	3.87237	0.508	0.377	C0		NAV2	89797	2.43568e-70	4.99127	0.373	0.179	C1		XRCC6	2547	7.02051e-07	-2.72246	0.998	0.934	C2		TAP2	6891	2.05991e-84	-1.31635	0.079	0.4	C3
TMEM30A	55754	1.56168e-13	3.85345	0.778	0.682	C0		WDR77	79084	1.14875e-91	4.99034	0.646	0.408	C1		CERS2	29956	6.03691e-06	-2.72404	0.791	0.701	C2		TARBP2	6895	3.57553e-81	-1.31698	0.103	0.422	C3
COL4A5	1287	7.68047e-70	3.84799	0.755	0.593	C0		ARID1A	8289	2.13314e-208	4.98808	0.87	0.58	C1		PCDH1	5097	0.00012688	-2.7285	0.71	0.633	C2		SPOUT1	51490	2.75116e-91	-1.31761	0.066	0.402	C3
ALOX5	240	1.09041e-12	3.8294	0.396	0.319	C0		HEBP2	23593	9.07383e-198	4.98643	0.998	0.935	C1		ARL8A	127829	0.000110625	-2.7355	0.507	0.532	C2		TFB1M	51106	7.65169e-95	-1.31771	0.057	0.399	C3
TM9SF3	56889	2.49576e-19	3.81589	0.956	0.853	C0		RNASEH1	246243	3.09156e-186	4.98574	0.88	0.625	C1		RFXANK	8625	4.43772e-05	-2.74027	0.682	0.691	C2		ZRANB1	54764	5.35574e-67	-1.31987	0.076	0.35	C3
SPAG4	6676	2.10457e-28	3.81445	0.282	0.176	C0		ATXN10	25814	2.48129e-242	4.983	0.974	0.794	C1		LENG1	79165	2.13737e-05	-2.7585	0.546	0.578	C2		SCLT1	132320	1.12823e-52	-1.31991	0.059	0.287	C3
ACTN1	87	1.53316e-19	3.8105	0.964	0.876	C0		MCM10	55388	0	4.97669	0.684	0.112	C1		ACACA	31	0.000964159	-2.75925	0.487	0.513	C2		COX10	1352	1.04247e-64	-1.32079	0.079	0.347	C3
PGRMC2	10424	5.32221e-19	3.79663	0.668	0.573	C0		ACAP2	23527	3.48217e-123	4.97502	0.927	0.755	C1		AHCTF1	25909	2.67182e-06	-2.77506	0.833	0.732	C2		GAS2L1	10634	2.68001e-82	-1.32101	0.06	0.371	C3
ANXA4	307	6.3689e-66	3.78913	0.921	0.776	C0		USP40	55230	1.33495e-238	4.97311	0.929	0.7	C1		FAAP20	199990	0.000305349	-2.78079	0.742	0.727	C2		LERFS	403323	2.96681e-77	-1.32174	0.086	0.391	C3
MAPKAPK3	7867	9.21258e-18	3.76801	0.564	0.477	C0		HPF1	54969	0	4.97229	0.951	0.669	C1		GLG1	2734	0.000998163	-2.79414	0.639	0.644	C2		RLIM	51132	1.4329e-76	-1.32279	0.096	0.4	C3
DHRS1	115817	5.13211e-16	3.73695	0.669	0.567	C0		LUC7L2	51631	0	4.96811	0.979	0.8	C1		PRSS21	10942	0.00123149	-2.79468	0.482	0.514	C2		ATP6V0A2	23545	7.62471e-74	-1.32321	0.062	0.353	C3
ATP6V1E1	529	0.000586396	3.7277	0.792	0.705	C0		ATL3	25923	7.08038e-257	4.96121	0.931	0.696	C1		BFSP1	631	0.000334142	-2.79563	0.238	0.284	C2		BAZ2B	29994	2.81074e-55	-1.3238	0.063	0.299	C3
ATP2A2	488	4.33787e-05	3.72207	0.867	0.779	C0		GIGYF2	26058	2.9201e-96	4.95973	0.785	0.573	C1		NEBL	10529	9.20549e-09	-2.79573	0.342	0.417	C2		MSH3	4437	1.34193e-76	-1.32428	0.1	0.404	C3
PRDX3	10935	1.99576e-12	3.72133	0.957	0.87	C0		NAXE	128240	1.04761e-215	4.9472	0.993	0.881	C1		NECTIN1	5818	0.00279754	-2.796	0.246	0.283	C2		RANBP17	64901	3.33391e-70	-1.32431	0.018	0.282	C3
CAMLG	819	8.53966e-11	3.71963	0.863	0.75	C0		GLOD4	51031	8.00191e-217	4.94531	0.949	0.751	C1		ATP11B	23200	8.69734e-07	-2.79691	0.523	0.55	C2		COX15	1355	8.90165e-95	-1.32444	0.067	0.41	C3
RICTOR	253260	3.09933e-37	3.70564	0.802	0.651	C0		VSIG10	54621	1.10258e-91	4.9447	0.637	0.392	C1		AKT3	10000	9.99813e-08	-2.79709	0.368	0.432	C2		PIK3CA	5290	8.50721e-69	-1.32584	0.078	0.357	C3
SLC11A2	4891	2.05828e-41	3.70279	0.623	0.479	C0		GARS	2617	6.28736e-95	4.94034	0.8	0.589	C1		TUBB6	84617	0.000181127	-2.80059	0.472	0.402	C2		S1PR3	1903	2.35926e-62	-1.32615	0.079	0.342	C3
TMEM164	84187	8.2672e-19	3.69824	0.603	0.5	C0		NUDT21	11051	0	4.93947	0.995	0.857	C1		NOP58	51602	4.48806e-26	-2.80063	0.86	0.702	C2		SCAF8	22828	1.17021e-84	-1.3272	0.073	0.392	C3
CYSRT1	375791	9.43849e-15	3.69706	0.514	0.437	C0		SGO1	151648	0	4.93842	0.607	0.113	C1		SLC35C2	51006	2.59382e-11	-2.80524	0.632	0.67	C2		PRKCA	5578	9.56364e-71	-1.32747	0.061	0.341	C3
CDC26	246184	1.73913e-11	3.69396	0.791	0.68	C0		PABPN1	8106	1.52932e-265	4.93422	0.952	0.711	C1		TYMSOS	494514	1.68337e-08	-2.80746	0.258	0.182	C2		PKP4	8502	3.89607e-78	-1.32913	0.097	0.405	C3
EIF4A3	9775	6.32118e-20	3.68398	0.868	0.787	C0		NETO2	81831	0	4.9341	0.745	0.266	C1		TRERF1	55809	0.00541919	-2.81769	0.342	0.371	C2		NKAPD1	55216	7.82601e-86	-1.33074	0.064	0.384	C3
ZDHHC14	79683	2.63306e-05	3.68098	0.416	0.368	C0		PYCR2	29920	0	4.92521	0.931	0.65	C1		HADH	3033	0.000146145	-2.81784	0.684	0.584	C2		GMEB2	26205	5.19674e-80	-1.33089	0.072	0.381	C3
CNPY2	10330	7.47378e-11	3.67932	0.971	0.853	C0		SLC4A2	6522	6.48239e-150	4.92368	0.822	0.557	C1		FOSB	2354	4.12895e-06	-2.82371	0.54	0.461	C2		RBL1	5933	7.66971e-50	-1.33107	0.041	0.254	C3
SMIM29	221491	3.13238e-33	3.67792	0.664	0.524	C0		FAIM	55179	5.54915e-291	4.92219	0.903	0.577	C1		AACS	65985	0.00115046	-2.82869	0.506	0.529	C2		GRB7	2886	9.29245e-65	-1.33236	0.055	0.318	C3
TAF7	6879	7.01926e-09	3.66365	0.897	0.779	C0		ZNF511	118472	1.95611e-211	4.91652	0.902	0.643	C1		MOSPD3	64598	0.00898233	-2.84197	0.67	0.663	C2		TXNDC15	79770	6.28396e-91	-1.33381	0.081	0.418	C3
DDX39B	7919	3.61136e-14	3.62564	0.941	0.818	C0		MIS18A	54069	0	4.91644	0.86	0.401	C1		FLOT1	10211	0.00169614	-2.84269	0.789	0.703	C2		INPPL1	3636	9.1258e-71	-1.33492	0.086	0.373	C3
TWF2	11344	7.01408e-16	3.62022	0.803	0.681	C0		VPS4A	27183	1.76077e-145	4.91365	0.835	0.575	C1		BCL6	604	6.30352e-07	-2.85237	0.337	0.4	C2		ZFP62	643836	7.35932e-74	-1.33533	0.087	0.383	C3
DDX17	10521	6.46044e-12	3.61687	0.991	0.887	C0		SLC30A5	64924	9.04628e-102	4.90863	0.825	0.617	C1		ANK3	288	5.56537e-15	-2.85512	0.478	0.56	C2		LHFPL2	10184	2.63766e-64	-1.33607	0.06	0.321	C3
GPRC5A	9052	1.0315e-48	3.61113	0.643	0.736	C0		TCEA2	6919	1.20787e-102	4.90405	0.832	0.619	C1		MFHAS1	9258	0.00131795	-2.85605	0.281	0.319	C2		KIAA2026	158358	3.63018e-84	-1.33706	0.073	0.392	C3
SEC11C	90701	2.50296e-34	3.60162	0.891	0.76	C0		RBM26	64062	1.95043e-110	4.90258	0.779	0.541	C1		HRAS	3265	3.16263e-12	-2.86719	0.706	0.571	C2		NAGLU	4669	1.23767e-80	-1.33735	0.062	0.37	C3
SMC4	10051	0	3.59602	0.359	0.769	C0		PSPH	5723	1.55924e-184	4.89907	0.898	0.646	C1		GRPEL1	80273	0.000619371	-2.88124	0.829	0.748	C2		TOR3A	64222	1.28251e-83	-1.33756	0.072	0.389	C3
SLC25A13	10165	0.000448057	3.57719	0.724	0.681	C0		CYB561D2.ENSG00000114395		1.72351e-89	4.89591	0.752	0.53	C1		TMEM126B	55863	5.12987e-06	-2.88164	0.793	0.696	C2		SMARCA2	6595	4.78275e-62	-1.33864	0.094	0.358	C3
MCUR1	63933	3.73476e-05	3.55187	0.903	0.837	C0		ESYT2	57488	1.37424e-146	4.8641	0.932	0.757	C1		ETV4	2118	0.000980522	-2.88289	0.79	0.698	C2		CCDC28A	25901	2.90279e-72	-1.33931	0.062	0.349	C3
GNE	10020	2.60533e-43	3.5513	0.269	0.143	C0		TEX264	51368	4.85168e-247	4.86315	0.933	0.67	C1		ARIH1	25820	0.00729146	-2.88435	0.499	0.513	C2		FXN	2395	9.48354e-68	-1.34241	0.066	0.342	C3
OGFOD1	55239	0.000373198	3.54437	0.448	0.479	C0		STX7	8417	1.49952e-41	4.85955	0.725	0.579	C1		FLRT3	23767	6.14561e-05	-2.88524	0.211	0.258	C2		PODXL2	50512	6.82236e-65	-1.34254	0.051	0.314	C3
JAG1	182	9.80015e-16	3.53867	0.256	0.181	C0		UCHL5	51377	0	4.84672	0.947	0.641	C1		ASF1B	55723	2.1186e-32	-2.88584	0.53	0.301	C2		SRCAP	10847	4.66114e-86	-1.3426	0.067	0.389	C3
CALML5	51806	1.55518e-10	3.53223	0.415	0.347	C0		SLC39A1	27173	3.19555e-253	4.8462	0.958	0.758	C1		ZNF511	118472	0.00119942	-2.88682	0.766	0.695	C2		PRR14	78994	4.88383e-69	-1.34279	0.089	0.374	C3
SPINT1-AS1	102724362	4.00839e-05	3.53076	0.759	0.662	C0		PRR34-AS1	150381	2.47462e-140	4.84486	0.845	0.597	C1		TUT7	79670	0.00154669	-2.89176	0.41	0.449	C2		CLOCK	9575	4.61027e-72	-1.34454	0.074	0.366	C3
COPG1	22820	3.1565e-76	3.51866	0.848	0.677	C0		SPPL3	121665	1.77075e-86	4.84249	0.795	0.591	C1		RSRC1	51319	0.000566706	-2.89269	0.853	0.775	C2		DHRS12	79758	2.45961e-69	-1.34535	0.094	0.382	C3
MPG	4350	5.13312e-25	3.51472	0.957	0.856	C0		MYO19	80179	0	4.83254	0.847	0.354	C1		CNOT1	23019	0.00047638	-2.89398	0.86	0.761	C2		TNFRSF19	55504	3.88522e-50	-1.34559	0.045	0.261	C3
PSORS1C1	170679	1.99759e-35	3.49022	0.341	0.218	C0		ABCD3	5825	2.1456e-110	4.82961	0.882	0.69	C1		NR2C2AP	126382	1.86121e-21	-2.89726	0.647	0.489	C2		IPP	3652	1.91081e-76	-1.34656	0.061	0.359	C3
CRELD2	79174	5.43657e-05	3.48715	0.696	0.622	C0		C1orf53	388722	1.42516e-90	4.82853	0.7	0.472	C1		SMAD1	4086	0.000602641	-2.89808	0.525	0.561	C2		DOK4	55715	1.57255e-61	-1.34714	0.061	0.317	C3
ST3GAL5	8869	4.61347e-32	3.48557	0.295	0.184	C0		CDCA2	157313	0	4.82839	0.501	0.08	C1		RCC2	55920	0.00863524	-2.89833	0.746	0.662	C2		DYRK2	8445	1.00927e-68	-1.34761	0.067	0.346	C3
CFAP20	29105	3.76162e-37	3.47462	0.725	0.733	C0		LSM10	84967	1.26199e-167	4.82034	0.898	0.691	C1		GTPBP2	54676	2.36483e-11	-2.9019	0.236	0.325	C2		CDK2	1017	3.02239e-55	-1.34781	0.069	0.308	C3
BDP1	55814	4.52717e-05	3.46898	0.619	0.626	C0		RDH14	57665	3.73201e-117	4.79513	0.836	0.608	C1		OGFOD3	79701	5.99538e-07	-2.90606	0.546	0.588	C2		GRAMD2A	196996	1.05766e-61	-1.34823	0.11	0.377	C3
NAPG	8774	4.33125e-14	3.44245	0.622	0.525	C0		SLC39A9	55334	3.35156e-102	4.79314	0.787	0.57	C1		TTC9	23508	5.59905e-12	-2.90646	0.222	0.315	C2		PLCB4	5332	2.95747e-49	-1.34853	0.063	0.282	C3
RFK	55312	6.10254e-07	3.43899	0.505	0.531	C0		GNA11	2767	1.09837e-175	4.78753	0.78	0.484	C1		RANBP9	10048	5.08243e-05	-2.90784	0.555	0.569	C2		TEFM	79736	1.04716e-101	-1.34953	0.072	0.434	C3
FRMD4B	23150	1.50327e-50	3.43321	0.61	0.454	C0		TNRC18	84629	2.89166e-130	4.78656	0.877	0.674	C1		CARD11	84433	1.82119e-06	-2.90784	0.397	0.451	C2		TCF20	6942	9.85882e-70	-1.34975	0.085	0.37	C3
ZNF703	80139	2.26137e-38	3.43028	0.512	0.366	C0		VPS4B	9525	1.10403e-100	4.78314	0.854	0.647	C1		MTURN	222166	0.00249973	-2.90862	0.505	0.441	C2		FAM126B	285172	1.72394e-82	-1.35108	0.063	0.375	C3
DNPH1	10591	0.000267252	3.43003	0.884	0.815	C0		DSN1	79980	0	4.78298	0.765	0.277	C1		CHORDC1	26973	9.36931e-07	-2.9127	0.746	0.654	C2		SYNM	23336	2.93844e-55	-1.35143	0.064	0.302	C3
CSTF3	1479	5.10527e-07	3.42741	0.567	0.581	C0		GRK6	2870	1.67516e-229	4.78106	0.808	0.464	C1		CERS4	79603	1.12063e-20	-2.91522	0.625	0.694	C2		MAP4K3	8491	1.10368e-64	-1.35148	0.095	0.369	C3
PCGF2	7703	0.00044043	3.42295	0.402	0.43	C0		MRPL24	79590	1.95523e-189	4.77238	0.912	0.688	C1		ADPRHL2	54936	0.00699177	-2.92158	0.702	0.671	C2		CHSY1	22856	3.00529e-57	-1.35207	0.077	0.325	C3
TUT7	79670	2.27981e-20	3.40884	0.502	0.393	C0		FAM120AOS	158293	3.90475e-111	4.75456	0.791	0.554	C1		EIF3B	8662	1.24611e-05	-2.92509	0.986	0.911	C2		RABEPK	10244	5.63631e-70	-1.35213	0.127	0.423	C3
SLC31A2	1318	2.54111e-32	3.404	0.433	0.307	C0		PSMD7	5713	3.03638e-299	4.75425	0.998	0.901	C1		TRIM38	10475	3.28211e-06	-2.93078	0.484	0.523	C2		RMND1	55005	1.69077e-91	-1.35321	0.081	0.421	C3
MET	4233	8.2818e-17	3.40312	0.226	0.308	C0		TRNAU1AP	54952	8.01485e-167	4.75376	0.765	0.464	C1		USP34	9736	0.000850668	-2.93652	0.747	0.733	C2		CBR4	84869	1.317e-92	-1.35348	0.074	0.414	C3
PPL	5493	0.00300923	3.39711	0.456	0.425	C0		MELK	9833	0	4.74537	0.751	0.152	C1		MACROD1	28992	6.20036e-13	-2.94004	0.611	0.672	C2		PARG	8505	7.74449e-74	-1.35354	0.096	0.394	C3
RBM12	10137	5.07004e-08	3.39288	0.485	0.518	C0		JPT2	90861	6.19344e-228	4.74283	0.827	0.506	C1		IGF2BP3	10643	1.94696e-05	-2.94542	0.714	0.634	C2		UBP1	7342	6.88645e-83	-1.35358	0.073	0.39	C3
MPZL2	10205	6.39357e-26	3.38854	0.722	0.615	C0		L3HYPDH	112849	4.62705e-207	4.73951	0.855	0.567	C1		PPP6R3	55291	0.00146588	-2.94662	0.802	0.728	C2		ITPR2	3709	1.48373e-61	-1.35477	0.1	0.364	C3
XIAP	331	2.68627e-07	3.37736	0.858	0.758	C0		PHKB	5257	1.49266e-103	4.73274	0.776	0.532	C1		PJA2	9867	5.91834e-16	-2.94745	0.534	0.615	C2		EIF2B4	8890	3.86927e-97	-1.35569	0.074	0.424	C3
AMOTL1	154810	0.00906142	3.35937	0.531	0.496	C0		TBC1D7	51256	8.61015e-111	4.72974	0.685	0.429	C1		LDLRAD3	143458	1.63594e-16	-2.94836	0.399	0.502	C2		LEMD3	23592	1.51774e-90	-1.35599	0.069	0.402	C3
ETV3	2117	2.19004e-10	3.34885	0.347	0.283	C0		STX10	8677	7.03005e-151	4.72787	0.866	0.63	C1		DYSF	8291	5.92951e-06	-2.95007	0.254	0.306	C2		ATG7	10533	1.70739e-74	-1.35616	0.054	0.344	C3
MGLL	11343	4.98656e-13	3.34617	0.681	0.701	C0		BOP1	23246	4.18473e-238	4.72336	0.903	0.614	C1		PANX1	24145	0.00162043	-2.95583	0.286	0.322	C2		PNMA1	9240	5.54044e-66	-1.35866	0.072	0.344	C3
SF3B4	10262	9.73698e-06	3.33817	0.913	0.803	C0		SAMD1	90378	1.55539e-234	4.72011	0.826	0.494	C1		HK2	3099	2.52306e-05	-2.95829	0.256	0.306	C2		HAUS2	55142	2.5124e-67	-1.35885	0.075	0.352	C3
HDLBP	3069	2.03779e-14	3.33628	0.981	0.899	C0		CNOT1	23019	1.59213e-234	4.71367	0.942	0.724	C1		FMNL2	114793	4.9851e-05	-2.95908	0.318	0.366	C2		WAC-AS1	220906	5.74518e-79	-1.36105	0.067	0.372	C3
DYSF	8291	1.69426e-08	3.33508	0.326	0.273	C0		GNAI3	2773	8.13887e-217	4.71222	0.985	0.856	C1		TM9SF4	9777	4.81234e-05	-2.96154	0.562	0.581	C2		CENPQ	55166	9.70863e-64	-1.36207	0.035	0.286	C3
SPTLC3	55304	2.88399e-37	3.33383	0.37	0.241	C0		PDLIM2	64236	2.35936e-26	4.71016	0.628	0.504	C1		ZNF22	7570	0.00082655	-2.96226	0.742	0.665	C2		SMG9	56006	1.87516e-84	-1.36208	0.052	0.366	C3
MIEN1	84299	0.00679666	3.32454	0.955	0.861	C0		ATL2	64225	3.93373e-114	4.70817	0.862	0.637	C1		AP2A1	160	0.000364631	-2.96677	0.719	0.709	C2		HOOK3	84376	4.18704e-72	-1.36224	0.105	0.399	C3
TAX1BP3	30851	5.63341e-06	3.32375	0.906	0.792	C0		RBBP8	5932	0	4.70569	0.757	0.272	C1		MYCBP2	23077	3.34154e-06	-2.97297	0.552	0.582	C2		PPP1R37	284352	3.42875e-80	-1.36269	0.062	0.368	C3
SGPP2	130367	1.46677e-51	3.32021	0.486	0.331	C0		HBS1L	10767	4.53064e-113	4.69998	0.819	0.603	C1		EIF4EBP2	1979	0.003038	-2.97351	0.834	0.737	C2		STAM2	10254	3.49963e-77	-1.36297	0.096	0.401	C3
ALKBH2	121642	1.04015e-13	3.31723	0.33	0.401	C0		COX16	51241	1.33159e-208	4.69862	0.998	0.905	C1		TIMM23	100287932	0.00305031	-2.97526	0.779	0.72	C2		GPANK1	7918	1.41089e-77	-1.36313	0.072	0.374	C3
ING1	3621	4.83388e-35	3.31561	0.28	0.399	C0		IDH2	3418	7.96941e-279	4.6947	0.971	0.77	C1		KLHL24	54800	0.00039082	-2.98338	0.21	0.253	C2		ZBTB41	360023	3.80005e-78	-1.36313	0.095	0.402	C3
NXF1	10482	6.14073e-08	3.31301	0.415	0.354	C0		PIP4P2	55529	4.96874e-82	4.69166	0.668	0.445	C1		CD320	51293	0.000270845	-2.98846	0.778	0.673	C2		TAF8	129685	1.32601e-75	-1.36384	0.1	0.405	C3
OCLN	100506658	2.66437e-25	3.30917	0.546	0.621	C0		POLR3H	171568	2.06083e-175	4.68539	0.848	0.581	C1		LMNB2	84823	3.67257e-25	-2.98854	0.656	0.472	C2		ESYT1	23344	1.11298e-84	-1.36385	0.071	0.392	C3
WDR74	54663	2.36222e-25	3.30889	0.748	0.72	C0		TRAF7	84231	1.38038e-169	4.68478	0.914	0.693	C1		TMEM184A	202915	5.30705e-08	-2.99456	0.387	0.448	C2		KIF16B	55614	3.41667e-69	-1.36415	0.117	0.405	C3
FURIN	5045	7.90865e-25	3.28901	0.57	0.465	C0		CACUL1	143384	9.45977e-72	4.67668	0.81	0.622	C1		NOL12	79159	0.000762009	-2.99853	0.847	0.749	C2		SPA17	53340	2.61545e-75	-1.36484	0.065	0.36	C3
FBP1	2203	1.87735e-17	3.2807	0.858	0.76	C0		RSRC1	51319	1.43936e-242	4.66803	0.959	0.733	C1		WBP11	51729	3.94726e-15	-2.9995	0.892	0.754	C2		KTI12	112970	1.15058e-86	-1.36592	0.084	0.413	C3
TBC1D9	23158	9.37411e-54	3.27148	0.492	0.322	C0		UBE2K	3093	0	4.65311	0.995	0.877	C1		TIPIN	54962	9.62815e-08	-3.00084	0.505	0.4	C2		MACO1	55219	7.09982e-76	-1.36616	0.097	0.397	C3
UFL1	23376	5.81155e-31	3.25371	0.755	0.623	C0		MRPL9	65005	4.15459e-205	4.6529	0.947	0.753	C1		TMEM263	90488	3.11085e-05	-3.01966	0.446	0.493	C2		EXOSC10	5394	1.07538e-79	-1.36687	0.089	0.401	C3
MAGOH	4116	2.78417e-43	3.25218	0.934	0.845	C0		SNHG30	105371743	1.78578e-56	4.64899	0.531	0.337	C1		SCYL1	57410	0.000970195	-3.02128	0.763	0.738	C2		RNF20	56254	4.8284e-89	-1.36707	0.102	0.439	C3
CXADR	1525	4.52121e-09	3.2516	0.815	0.711	C0		ITGA6	3655	3.17086e-230	4.64742	0.914	0.632	C1		TRIM16	10626	1.13617e-08	-3.02835	0.818	0.731	C2		ATP8B1	5205	4.41602e-76	-1.36713	0.086	0.387	C3
NORAD	647979	2.01014e-37	3.24539	0.888	0.762	C0		NUP205	23165	8.55385e-233	4.64331	0.77	0.403	C1		RRAS2	22800	0.00663212	-3.03213	0.578	0.58	C2		PLEKHA8	84725	2.85297e-78	-1.36715	0.1	0.412	C3
ME1	4199	4.16969e-42	3.23383	0.946	0.834	C0		SMPD4	55627	4.18846e-307	4.64231	0.793	0.371	C1		PNPT1	87178	2.99143e-07	-3.04405	0.617	0.531	C2		FBXL3	26224	1.59132e-79	-1.36733	0.06	0.365	C3
PTPRK	5796	4.12363e-23	3.22951	0.601	0.487	C0		CHST12	55501	5.29707e-46	4.63272	0.744	0.578	C1		SGMS1	259230	1.22119e-06	-3.045	0.471	0.518	C2		SGMS2	166929	1.32332e-68	-1.36797	0.074	0.354	C3
STX8	9482	3.13857e-15	3.22529	0.73	0.607	C0		CAND1	55832	3.2477e-248	4.63223	0.938	0.689	C1		IQANK1	642574	0.000293367	-3.04587	0.626	0.641	C2		ZWILCH	55055	2.93e-63	-1.3681	0.057	0.315	C3
GTF3A	2971	0.00120819	3.22004	0.99	0.909	C0		GET3	439	7.87165e-185	4.62729	0.949	0.729	C1		POLE3	54107	1.73741e-26	-3.04916	0.837	0.664	C2		SUV39H2	79723	1.97228e-73	-1.36863	0.054	0.34	C3
MRPS16	51021	9.85678e-08	3.20418	0.985	0.895	C0		SENP2	59343	5.22859e-123	4.6197	0.763	0.511	C1		PSORS1C1	170679	2.94331e-12	-3.05345	0.202	0.289	C2		IPMK	253430	1.19479e-60	-1.36864	0.042	0.288	C3
SLC12A5	57468	0.00011333	3.19575	0.334	0.294	C0		PMPCB	9512	2.48444e-115	4.61968	0.882	0.678	C1		GALE	2582	0.000607122	-3.06177	0.71	0.685	C2		POC1B	282809	1.15308e-70	-1.36901	0.096	0.386	C3
BZW1	9689	1.19043e-11	3.18606	0.997	0.926	C0		NUP42	11097	3.16511e-186	4.61816	0.791	0.476	C1		NOTCH3	4854	9.79093e-14	-3.06285	0.485	0.563	C2		PTAR1	375743	1.10675e-81	-1.36976	0.07	0.382	C3
LMBRD1	55788	8.47934e-71	3.17967	0.786	0.604	C0		PMF1	11243	3.11686e-244	4.61483	0.93	0.674	C1		WDR77	79084	0.000832328	-3.07176	0.526	0.454	C2		LINC00472	79940	3.87424e-49	-1.37078	0.041	0.252	C3
CCDC59	29080	9.21064e-07	3.17599	0.71	0.683	C0		TGFBR3L	100507588	1.13564e-193	4.61155	0.866	0.58	C1		ANKRD13D	338692	1.61236e-06	-3.07506	0.625	0.64	C2		EPHA1	2041	1.162e-67	-1.37083	0.071	0.348	C3
SLC39A10	57181	7.40592e-19	3.17347	0.517	0.419	C0		MRPS18B	28973	7.40268e-242	4.60988	0.922	0.655	C1		TAF13	6884	0.000392781	-3.07544	0.574	0.585	C2		FBXL12	54850	8.5531e-97	-1.37126	0.086	0.437	C3
UBE2V1	7335	4.86129e-12	3.17054	0.993	0.891	C0		TMEM99	147184	3.98308e-150	4.6041	0.954	0.769	C1		RTL8B	441518	7.88935e-05	-3.09037	0.498	0.532	C2		ZNF750	79755	1.04269e-42	-1.37128	0.054	0.251	C3
GCC2	9648	8.60399e-13	3.16787	0.547	0.462	C0		MRPL16	54948	3.6172e-235	4.60224	0.931	0.689	C1		HDAC5	10014	1.20955e-06	-3.1158	0.349	0.405	C2		SLF1	84250	2.22528e-57	-1.37184	0.055	0.296	C3
PPP4C	5531	8.31443e-06	3.16683	0.995	0.898	C0		POP4	10775	6.2591e-236	4.59515	0.962	0.758	C1		RNF168	165918	0.00852725	-3.11726	0.573	0.522	C2		C1orf115	79762	1.75792e-52	-1.37185	0.058	0.287	C3
NOTCH2	4853	0.000776614	3.16089	0.652	0.597	C0		MBD2	8932	4.93844e-156	4.59395	0.96	0.815	C1		ABHD16A	7920	5.1054e-12	-3.12049	0.543	0.59	C2		SNX7	51375	7.51863e-63	-1.37193	0.06	0.318	C3
INSL4	3641	8.63769e-47	3.15982	0.578	0.424	C0		TTC4	7268	3.34138e-119	4.58904	0.718	0.457	C1		SLC39A10	57181	0.000269302	-3.12238	0.436	0.469	C2		ABHD4	63874	5.0951e-83	-1.3729	0.095	0.414	C3
CYP1B1	1545	4.14906e-35	3.1598	0.847	0.777	C0		MRPS12	6183	0	4.58799	0.998	0.901	C1		PPM1K	152926	0.000827832	-3.13231	0.211	0.253	C2		VPS26C	10311	3.33832e-76	-1.37333	0.083	0.384	C3
MT-ND4L	4539	5.00197e-21	3.15978	0.998	0.929	C0		RCCD1	91433	9.60426e-284	4.58549	0.695	0.277	C1		RIDA	10247	0.000269152	-3.13875	0.635	0.65	C2		POU2F1	5451	5.91889e-65	-1.37349	0.082	0.354	C3
RAB11A	8766	3.79469e-51	3.15708	0.981	0.877	C0		MRPL43	84545	9.14545e-233	4.58412	0.999	0.897	C1		ACO2	50	0.000219204	-3.13932	0.804	0.767	C2		CCP110	9738	2.28769e-51	-1.3747	0.048	0.27	C3
TMEM187	8269	3.39852e-09	3.15046	0.495	0.413	C0		SDHAF3	57001	1.1591e-230	4.58312	0.903	0.627	C1		AGPAT5	55326	4.33849e-06	-3.14117	0.485	0.396	C2		SOCS5	9655	6.53473e-86	-1.37536	0.081	0.408	C3
MYOF	26509	4.32503e-14	3.1502	0.899	0.805	C0		STAG1	10274	1.03684e-172	4.58016	0.589	0.273	C1		HYAL2	8692	2.66691e-06	-3.16102	0.552	0.59	C2		GBF1	8729	2.91077e-87	-1.37618	0.094	0.423	C3
ACACA	31	1.95578e-12	3.1488	0.552	0.472	C0		ABHD17C	58489	5.45991e-140	4.57745	0.897	0.669	C1		ALKBH2	121642	5.6877e-05	-3.17382	0.423	0.358	C2		RPAP2	79871	1.33852e-86	-1.37903	0.07	0.397	C3
MORN2	729967	1.31385e-13	3.14643	0.883	0.772	C0		PCNP	57092	3.53609e-262	4.57521	0.998	0.881	C1		JMJD4	65094	3.61663e-11	-3.17892	0.466	0.54	C2		ICE2	79664	3.70709e-82	-1.38045	0.086	0.403	C3
TATDN1	83940	2.10833e-07	3.14606	0.883	0.764	C0		FAM200B	285550	1.35192e-80	4.57286	0.688	0.47	C1		ATL3	25923	1.07729e-08	-3.18797	0.847	0.735	C2		AMACR	23600	2.13574e-83	-1.38193	0.086	0.405	C3
TTC9	23508	6.92368e-10	3.14064	0.336	0.268	C0		DHRS4	10901	1.79001e-160	4.57257	0.839	0.576	C1		PSIP1	11168	6.56656e-22	-3.19421	0.678	0.486	C2		PPP1R3D	5509	2.97979e-91	-1.38201	0.079	0.417	C3
IAH1	285148	0.00316349	3.13972	0.93	0.851	C0		FKBP2	2286	1.95735e-50	4.56904	0.604	0.425	C1		TAF15	8148	2.7583e-09	-3.20536	0.663	0.557	C2		CALHM2	51063	7.35277e-73	-1.3841	0.061	0.35	C3
C19orf33	64073	2.0451e-78	3.13532	0.992	0.911	C0		FMC1	154791	5.22999e-110	4.56888	0.847	0.638	C1		FAM217B	63939	6.12832e-07	-3.20874	0.605	0.639	C2		TBC1D17	79735	8.64436e-92	-1.3848	0.073	0.41	C3
TRIP6	7205	9.115e-08	3.13439	0.827	0.725	C0		HIPK1	204851	5.43536e-186	4.5543	0.916	0.695	C1		PEF1	553115	0.0015485	-3.20984	0.859	0.777	C2		SEC22A	26984	8.59912e-94	-1.38501	0.078	0.421	C3
GOLGA2	2801	3.15333e-31	3.13272	0.883	0.758	C0		MRPL38	64978	1.43414e-169	4.55154	0.908	0.68	C1		PHKB	5257	0.00213627	-3.21645	0.577	0.595	C2		HERC2	8924	3.43341e-85	-1.38524	0.113	0.446	C3
ITM2C	81618	7.08636e-17	3.13137	0.933	0.821	C0		CDK12	51755	1.46238e-118	4.54512	0.841	0.633	C1		PLA2G12A	81579	0.00321926	-3.22648	0.618	0.62	C2		USP38	84640	2.54188e-56	-1.38855	0.077	0.321	C3
MGST2	4258	2.72456e-06	3.12517	0.871	0.765	C0		FAM110A	83541	3.40694e-126	4.54331	0.86	0.655	C1		AC010198.2		0.000110234	-3.23306	0.402	0.449	C2		AL392172.1		2.32762e-36	-1.38986	0.072	0.253	C3
COX7A2L	9167	3.3069e-05	3.12418	0.997	0.919	C0		MRPL48	51642	8.06634e-218	4.53948	0.941	0.728	C1		SPTLC3	55304	1.84592e-13	-3.24864	0.222	0.315	C2		FAM110C	642273	2.8063e-63	-1.39043	0.089	0.355	C3
CYB5R1	51706	3.3519e-73	3.12197	0.827	0.648	C0		NUP35	129401	9.93994e-303	4.53791	0.822	0.411	C1		ESCO2	157570	0.00111146	-3.25016	0.266	0.208	C2		CEP170	9859	1.18066e-54	-1.39095	0.07	0.308	C3
ACSL1	2180	5.2906e-18	3.11706	0.67	0.578	C0		OTUB1	55611	1.12432e-157	4.53716	0.962	0.804	C1		CENPK	64105	9.44703e-60	-3.25214	0.732	0.412	C2		FNDC10	643988	1.57214e-67	-1.39126	0.053	0.324	C3
KLHL24	54800	1.76413e-43	3.11628	0.321	0.184	C0		MLST8	64223	7.89041e-146	4.53416	0.782	0.511	C1		CIR1	9541	0.000287032	-3.26269	0.695	0.697	C2		SNX30	401548	3.04094e-70	-1.39128	0.08	0.365	C3
UGDH	7358	5.56841e-17	3.11603	0.62	0.667	C0		ESRRA	2101	7.55241e-148	4.52934	0.923	0.736	C1		FKBP2	2286	0.00595054	-3.2711	0.444	0.473	C2		UBAC1	10422	8.42792e-85	-1.39166	0.099	0.423	C3
SYAP1	94056	0.00620893	3.10427	0.888	0.807	C0		SSU72	29101	7.9042e-276	4.52683	0.999	0.9	C1		DAZAP1	26528	1.54371e-06	-3.27235	0.822	0.717	C2		RING1	6015	2.57056e-95	-1.39233	0.076	0.423	C3
GPATCH2L	55668	1.85201e-12	3.09685	0.681	0.586	C0		CD320	51293	7.53193e-280	4.52148	0.916	0.618	C1		ZFR	51663	1.40967e-07	-3.283	0.818	0.72	C2		ZNF512B	57473	6.82191e-85	-1.39248	0.087	0.41	C3
PSAP	5660	3.19066e-50	3.09325	0.926	0.795	C0		WDR1	9948	4.54366e-256	4.51403	0.959	0.752	C1		ZC3H8	84524	1.22163e-05	-3.31608	0.427	0.356	C2		ODF2	4957	7.77535e-63	-1.39264	0.07	0.335	C3
DNAJB9	4189	2.22094e-56	3.09024	0.475	0.31	C0		MORF4L1	10933	0	4.51308	1	0.935	C1		RASA1	5921	1.84005e-12	-3.31779	0.555	0.622	C2		JADE1	79960	1.93794e-49	-1.39324	0.059	0.276	C3
PTPN3	5774	3.16119e-09	3.07833	0.505	0.439	C0		PAPOLA	10914	2.04508e-222	4.51294	0.98	0.832	C1		GATAD1	57798	0.00229878	-3.33123	0.484	0.511	C2		TRMT1	55621	1.19455e-90	-1.39357	0.063	0.394	C3
SMIM22	440335	2.02477e-67	3.07784	0.989	0.882	C0		GLRX2	51022	5.1625e-189	4.51069	0.951	0.747	C1		ZDHHC14	79683	7.24753e-10	-3.35311	0.322	0.404	C2		MOGS	7841	4.83154e-86	-1.39369	0.08	0.406	C3
MAN2A1	4124	8.24773e-06	3.05865	0.353	0.307	C0		COPE	11316	9.88918e-240	4.51061	1	0.918	C1		GPN3	51184	2.84749e-12	-3.35652	0.784	0.638	C2		PCGF3	10336	1.45897e-87	-1.39547	0.076	0.403	C3
SLC7A5	8140	2.00151e-28	3.05124	0.491	0.579	C0		SLC39A4	55630	3.68721e-279	4.51039	0.999	0.919	C1		CHML	1122	2.93395e-05	-3.36291	0.646	0.557	C2		USP36	57602	1.22644e-63	-1.39567	0.077	0.344	C3
BCL3	602	1.09311e-09	3.05118	0.346	0.28	C0		GGCT	79017	0	4.50908	1	0.945	C1		MCM6	4175	2.55673e-14	-3.36422	0.526	0.387	C2		MTMR14	64419	4.3686e-85	-1.39648	0.095	0.418	C3
UBL4A	8266	6.22628e-37	3.0495	0.815	0.787	C0		BNIP3	664	1.55149e-115	4.50895	0.919	0.75	C1		RHNO1	83695	8.69842e-07	-3.36517	0.568	0.458	C2		SH3GL1	6455	1.42156e-87	-1.39675	0.079	0.406	C3
PTBP3	9991	3.73435e-09	3.04643	0.966	0.86	C0		CHCHD10	400916	3.0606e-231	4.50853	0.998	0.928	C1		THOC6	79228	2.2859e-09	-3.36716	0.703	0.581	C2		CLCC1	23155	2.52408e-91	-1.39724	0.073	0.409	C3
IRAK1	3654	4.18683e-07	3.03968	0.917	0.844	C0		CCDC85B	11007	0	4.50777	0.994	0.855	C1		NUFIP2	57532	0.00736006	-3.36854	0.826	0.743	C2		RNF40	9810	1.05113e-76	-1.39925	0.112	0.421	C3
RSL24D1	51187	4.63053e-10	3.03878	0.916	0.782	C0		NME4	4833	3.43295e-257	4.50681	0.997	0.884	C1		DDX39A	10212	2.69302e-37	-3.38152	0.871	0.688	C2		SLC25A23	79085	3.63322e-72	-1.39993	0.09	0.383	C3
CDC34	997	2.2489e-05	3.03464	0.761	0.672	C0		HOXB7	3217	1.44141e-225	4.50333	0.782	0.43	C1		MLXIP	22877	2.95084e-05	-3.38276	0.65	0.647	C2		PECR	55825	1.03853e-91	-1.40018	0.075	0.412	C3
ABCF1	23	0.000284866	3.02911	0.707	0.686	C0		MIOS	54468	8.48471e-50	4.50172	0.699	0.506	C1		TGFBR3L	100507588	8.13815e-10	-3.39333	0.614	0.658	C2		THNSL2	55258	2.85618e-78	-1.4007	0.069	0.371	C3
PAIP2	51247	6.33697e-15	3.02319	0.977	0.86	C0		STK16	8576	1.84538e-85	4.5004	0.823	0.625	C1		SEC23B	10483	2.4759e-08	-3.40101	0.687	0.699	C2		COG6	57511	2.25006e-72	-1.401	0.073	0.362	C3
DLGAP4	22839	1.3944e-25	3.01244	0.702	0.58	C0		KLHL42	57542	1.70319e-210	4.49724	0.842	0.539	C1		SUGT1	10910	0.000111626	-3.4099	0.802	0.724	C2		METTL17	64745	8.87386e-84	-1.4026	0.076	0.395	C3
ADNP2	22850	2.89221e-06	3.00733	0.275	0.32	C0		NUFIP2	57532	2.51698e-120	4.49665	0.893	0.713	C1		YPEL3	83719	1.01458e-12	-3.41178	0.421	0.499	C2		MTMR2	8898	1.07485e-88	-1.40275	0.076	0.408	C3
POR	5447	8.33165e-44	3.00648	0.961	0.825	C0		TRIP12	9320	4.59711e-98	4.49648	0.932	0.779	C1		ALOX5	240	0.00140835	-3.41759	0.324	0.36	C2		TOR1AIP1	26092	5.0199e-82	-1.40342	0.081	0.399	C3
AHCY	191	5.76211e-14	2.97723	0.913	0.829	C0		GDI2	2665	4.25843e-255	4.49486	0.989	0.862	C1		PRPF38B	55119	0.000164563	-3.42054	0.768	0.691	C2		C6orf120	387263	5.40989e-79	-1.40351	0.096	0.407	C3
TRERF1	55809	5.62505e-07	2.96824	0.399	0.338	C0		FDX2	112812	4.87824e-185	4.49402	0.86	0.591	C1		UBE2E2	7325	3.3999e-07	-3.43782	0.447	0.501	C2		NIT1	4817	2.80385e-94	-1.40368	0.063	0.405	C3
RTKN2	219790	2.14076e-91	2.96144	0.262	0.478	C0		SLTM	79811	7.22432e-172	4.49356	0.936	0.743	C1		VPS37A	137492	0.00405669	-3.45478	0.521	0.541	C2		SNX29	92017	3.37647e-50	-1.40473	0.081	0.308	C3
MANSC1	54682	5.02959e-33	2.96033	0.805	0.691	C0		EXO1	9156	0	4.49285	0.554	0.073	C1		PLXNB2	23654	0.000275296	-3.45782	0.737	0.719	C2		ALDH18A1	5832	2.85092e-88	-1.40592	0.1	0.434	C3
OLMALINC	90271	4.44187e-05	2.9408	0.277	0.317	C0		AKIRIN2	55122	1.04534e-196	4.48977	0.908	0.674	C1		MEF2D	4209	0.000624918	-3.47982	0.4	0.444	C2		EPB41L1	2036	2.60793e-76	-1.406	0.08	0.379	C3
SPTLC2	9517	2.01891e-38	2.9312	0.755	0.615	C0		THOC2	57187	5.08354e-289	4.48605	0.981	0.815	C1		FBL	2091	1.38814e-10	-3.48373	0.898	0.789	C2		PPAT	5471	5.6798e-73	-1.40617	0.076	0.368	C3
TWISTNB	221830	4.03357e-13	2.92973	0.721	0.714	C0		HERC5	51191	6.09085e-70	4.4829	0.265	0.1	C1		TRAM1	23471	0.00100442	-3.48539	0.797	0.762	C2		UTP3	57050	2.83778e-97	-1.40623	0.092	0.448	C3
UBASH3B	84959	0.00105753	2.92206	0.496	0.524	C0		SHCBP1	79801	0	4.48094	0.701	0.148	C1		HSPH1	10808	2.08409e-09	-3.49695	0.95	0.855	C2		ATF6B	1388	2.23819e-97	-1.40635	0.07	0.42	C3
UBQLN2	29978	8.67601e-52	2.91941	0.641	0.479	C0		EWSR1	2130	8.28154e-196	4.4802	0.946	0.747	C1		FMC1	154791	3.01135e-06	-3.49925	0.76	0.675	C2		CARS	833	5.81998e-85	-1.4064	0.097	0.421	C3
EHF	26298	4.74315e-20	2.87407	0.707	0.598	C0		CENPS	378708	0	4.47613	0.81	0.339	C1		GPAT3	84803	0.00661221	-3.52438	0.266	0.297	C2		SFT2D3	84826	1.98366e-83	-1.40858	0.086	0.405	C3
NIP7	51388	2.62991e-19	2.85739	0.651	0.671	C0		MOCS2	4338	1.74372e-227	4.47307	0.926	0.677	C1		PIGT	51604	2.05774e-05	-3.52497	0.849	0.815	C2		AL121944.1		2.783e-46	-1.41035	0.059	0.266	C3
PEX11A	8800	1.5696e-69	2.85689	0.548	0.361	C0		DDX39A	10212	0	4.45835	0.968	0.638	C1		C1orf131	128061	2.87999e-05	-3.52961	0.719	0.628	C2		ZBTB33	10009	1.18788e-75	-1.41136	0.081	0.381	C3
CCNQ	92002	5.50639e-09	2.85626	0.733	0.716	C0		RSBN1	54665	4.86064e-100	4.4468	0.742	0.544	C1		BCL7C	9274	1.27591e-05	-3.53118	0.849	0.744	C2		ANKRD27	84079	1.21006e-75	-1.41222	0.077	0.374	C3
JARID2	3720	1.0555e-27	2.84926	0.658	0.513	C0		FIS1	51024	7.14855e-236	4.44617	0.999	0.926	C1		SRXN1	140809	0.000208299	-3.53181	0.896	0.814	C2		EHMT2	10919	4.62873e-91	-1.41229	0.09	0.429	C3
AL355512.1		0.00506785	2.84752	0.349	0.319	C0		ANXA11	311	1.87179e-168	4.44594	0.975	0.818	C1		BORCS7	119032	7.03051e-05	-3.53259	0.667	0.675	C2		ME2	4200	3.28733e-69	-1.4133	0.081	0.364	C3
SPRY1	10252	6.66048e-24	2.84589	0.439	0.327	C0		GSK3A	2931	3.53672e-144	4.44157	0.785	0.527	C1		MRPL49	740	0.00681591	-3.53403	0.838	0.763	C2		PLXND1	23129	4.14535e-85	-1.41342	0.077	0.402	C3
SEC14L1	6397	2.8391e-08	2.84119	0.547	0.479	C0		ARHGAP32	9743	1.17088e-25	4.44142	0.546	0.411	C1		SSH3	54961	2.48528e-05	-3.54543	0.684	0.683	C2		ANKRD50	57182	5.89848e-67	-1.41364	0.081	0.356	C3
PLSCR3	57048	1.92122e-13	2.83987	0.399	0.313	C0		IPO9	55705	0	4.44122	0.903	0.502	C1		BUB1	699	1.24957e-83	-3.54917	0.493	0.223	C2		UBE2D4	51619	1.52994e-80	-1.41382	0.111	0.429	C3
RETREG1	54463	4.54196e-09	2.83942	0.222	0.281	C0		IGFBP5	3488	8.5612e-48	4.43659	0.6	0.41	C1		CORO1C	23603	0.000873278	-3.54998	0.61	0.531	C2		MTPAP	55149	3.414e-87	-1.41636	0.085	0.417	C3
NDUFA6	4700	5.94503e-14	2.83825	0.987	0.91	C0		TIMM50	92609	1.10012e-249	4.42635	0.939	0.684	C1		GALNT11	63917	6.11655e-06	-3.55581	0.626	0.639	C2		OGFRL1	79627	7.84927e-44	-1.41643	0.065	0.27	C3
ITGB1BP1	9270	3.88506e-21	2.83357	0.926	0.855	C0		GDPD3	79153	3.05801e-17	4.42395	0.431	0.325	C1		BRCC3	79184	0.000496264	-3.58423	0.67	0.586	C2		STEAP3	55240	2.15297e-77	-1.41674	0.076	0.381	C3
AAMDC	28971	1.12674e-10	2.83181	0.646	0.554	C0		TMEM160	54958	3.83315e-276	4.42222	0.969	0.759	C1		TP53I13	90313	1.48707e-11	-3.58498	0.633	0.665	C2		CDH3	1001	4.00419e-53	-1.41696	0.077	0.313	C3
RAE1	8480	1.4531e-08	2.83152	0.703	0.681	C0		MTX2	10651	1.3293e-239	4.41555	0.986	0.824	C1		SCAMP1	9522	5.36025e-08	-3.58588	0.625	0.665	C2		RUNDC1	146923	1.24144e-69	-1.41891	0.074	0.355	C3
RAB11FIP4	84440	1.19924e-22	2.82958	0.468	0.364	C0		PKN2	5586	2.51031e-163	4.41508	0.863	0.623	C1		LRRC26	389816	2.84471e-09	-3.59312	0.598	0.655	C2		ITSN1	6453	1.3948e-68	-1.41941	0.081	0.362	C3
AHCYL1	10768	0.000244237	2.82906	0.969	0.863	C0		MRPL11	65003	0	4.40997	0.998	0.894	C1		CEBPZ	10153	0.00271234	-3.59727	0.725	0.658	C2		QRICH1	54870	4.5131e-73	-1.41946	0.118	0.419	C3
SARAF	51669	1.49884e-36	2.82638	0.965	0.838	C0		TBC1D1	23216	1.34861e-165	4.405	0.654	0.332	C1		MED4	29079	0.00179465	-3.59904	0.805	0.761	C2		CRYZL1	9946	2.79232e-78	-1.42048	0.042	0.339	C3
LINC00662	148189	9.59605e-06	2.82389	0.351	0.3	C0		TJP1	7082	1.18495e-116	4.4049	0.806	0.589	C1		SYNE4	163183	2.94692e-09	-3.61906	0.707	0.722	C2		MFSD14C	84278	7.47356e-92	-1.4209	0.074	0.41	C3
SSB	6741	4.24023e-20	2.82015	0.939	0.859	C0		SAP30	8819	7.59716e-247	4.39892	0.522	0.153	C1		DHTKD1	55526	7.8486e-35	-3.6301	0.714	0.487	C2		ST6GALNAC4	27090	3.69371e-96	-1.42095	0.051	0.395	C3
LLGL2	3993	1.20176e-35	2.81702	0.726	0.582	C0		NAP1L4	4676	1.71948e-209	4.39691	0.906	0.634	C1		TMEM187	8269	0.000257468	-3.63052	0.424	0.456	C2		S100PBP	64766	7.62533e-83	-1.4217	0.086	0.403	C3
CFLAR	8837	3.90038e-05	2.81456	0.686	0.608	C0		ZUP1	221302	4.45149e-51	4.39574	0.422	0.248	C1		EHBP1	23301	4.68663e-13	-3.63147	0.561	0.621	C2		TMTC3	160418	4.45202e-86	-1.42183	0.095	0.422	C3
UNC50	25972	1.18707e-35	2.81227	0.918	0.782	C0		DHX15	1665	1.03988e-265	4.39542	0.941	0.695	C1		RSU1	6251	1.41769e-06	-3.63499	0.655	0.657	C2		METTL2B	55798	1.9626e-102	-1.42398	0.062	0.424	C3
UBAC2	337867	6.22255e-37	2.80591	0.842	0.694	C0		TOPBP1	11073	0	4.39094	0.798	0.361	C1		SLC66A2	80148	0.00457136	-3.6389	0.537	0.549	C2		PCIF1	63935	3.02976e-74	-1.42469	0.079	0.376	C3
FLRT3	23767	1.02446e-12	2.78933	0.288	0.218	C0		TDG	6996	3.17627e-174	4.3778	0.89	0.644	C1		SLC25A10	1468	6.87042e-09	-3.64245	0.652	0.536	C2		PXN-AS1	100506649	5.17747e-81	-1.42522	0.051	0.357	C3
CLPX	10845	4.93135e-06	2.77379	0.448	0.392	C0		MRPL36	64979	1.44315e-297	4.37644	1	0.916	C1		CDC45	8318	3.4867e-08	-3.64383	0.348	0.244	C2		FAM114A2	10827	7.80979e-85	-1.42524	0.078	0.399	C3
JMJD4	65094	1.87747e-23	2.7729	0.598	0.469	C0		OSGEP	55644	9.49927e-196	4.376	0.848	0.559	C1		GTPBP4	23560	2.70002e-08	-3.65352	0.91	0.795	C2		NDEL1	81565	2.88531e-96	-1.42543	0.061	0.407	C3
BIRC6	57448	9.79827e-26	2.7719	0.808	0.69	C0		SPATS2	65244	5.61822e-194	4.36797	0.822	0.51	C1		RNASEH2B	79621	9.19328e-12	-3.65503	0.714	0.559	C2		NCOA1	8648	7.72093e-77	-1.42581	0.097	0.402	C3
PTPRF	5792	6.23647e-34	2.77002	0.843	0.719	C0		NDUFV1	4723	0	4.3633	1	0.895	C1		MRPL35	51318	3.51779e-07	-3.65571	0.778	0.673	C2		TRIM26	7726	5.40134e-65	-1.42655	0.078	0.347	C3
LRP8	7804	2.33892e-16	2.76016	0.662	0.685	C0		DBNDD1	79007	3.50382e-107	4.36131	0.676	0.427	C1		PTPN3	5774	1.31313e-08	-3.65818	0.416	0.48	C2		CNBD2	140894	1.44584e-51	-1.42671	0.063	0.289	C3
EIF5B	9669	0.000100585	2.75817	0.952	0.849	C0		TRMT10C	54931	1.54774e-211	4.357	0.967	0.802	C1		LSM14A	26065	8.14998e-07	-3.67531	0.917	0.818	C2		C11orf68	83638	1.71999e-96	-1.42735	0.087	0.437	C3
TMEM50B	757	7.17109e-09	2.75458	0.433	0.361	C0		BCKDK	10295	1.42496e-115	4.34729	0.816	0.576	C1		AC020916.1		6.26414e-05	-3.6755	0.298	0.25	C2		ABCF3	55324	7.15224e-108	-1.42747	0.069	0.442	C3
ATP11B	23200	2.91374e-25	2.74439	0.604	0.497	C0		HCFC1	3054	4.67886e-172	4.34614	0.777	0.491	C1		N4BP2L2	10443	0.00112981	-3.67638	0.826	0.776	C2		WDR92	116143	1.91509e-85	-1.42792	0.1	0.426	C3
TMEM38A	79041	1.03458e-13	2.73713	0.379	0.298	C0		TBRG4	9238	1.8708e-197	4.34298	0.89	0.612	C1		LLGL2	3993	4.70249e-10	-3.69409	0.614	0.654	C2		AC244102.4		1.40389e-81	-1.42914	0.059	0.368	C3
SKAP2	8935	2.84042e-06	2.73036	0.657	0.6	C0		FADD	8772	5.03824e-144	4.34226	0.791	0.506	C1		PTPRK	5796	3.27011e-07	-3.70028	0.499	0.547	C2		LNPEP	4012	1.01611e-89	-1.43109	0.088	0.424	C3
SMURF1	57154	1.20149e-14	2.72974	0.545	0.45	C0		TXNL4A	10907	1.21825e-303	4.34105	0.998	0.898	C1		DPF2	5977	0.00257077	-3.71093	0.672	0.668	C2		CAMKK2	10645	2.296e-75	-1.43302	0.091	0.391	C3
CD2BP2	10421	4.54664e-15	2.72688	0.671	0.566	C0		CARD19	84270	2.88493e-207	4.33908	0.974	0.777	C1		CAT	847	6.50811e-05	-3.71119	0.878	0.827	C2		COBL	23242	1.33788e-63	-1.43472	0.096	0.367	C3
TMEM33	55161	4.74526e-11	2.72292	0.942	0.838	C0		UHMK1	127933	7.9654e-101	4.33645	0.89	0.697	C1		TMC6	11322	1.94745e-18	-3.71352	0.629	0.677	C2		GPR143	4935	7.5642e-79	-1.43474	0.066	0.37	C3
PEPD	5184	1.90064e-51	2.71928	0.902	0.759	C0		UBE2E2	7325	4.47539e-66	4.33168	0.644	0.443	C1		ORAI1	84876	4.0222e-06	-3.71613	0.599	0.62	C2		LRCH4	4034	7.79407e-76	-1.43478	0.059	0.352	C3
RWDD4	201965	0.000526407	2.7151	0.773	0.734	C0		FRG1	2483	4.85193e-243	4.33112	0.905	0.619	C1		PAM	5066	2.85179e-06	-3.72084	0.329	0.388	C2		PTPRU	10076	1.66031e-66	-1.43678	0.088	0.366	C3
CEBPZ	10153	1.00054e-06	2.71132	0.674	0.665	C0		TMEM54	113452	2.79257e-295	4.3243	0.981	0.805	C1		RPA1	6117	4.69226e-08	-3.72881	0.738	0.605	C2		TRIM13	10206	6.17649e-78	-1.43766	0.084	0.391	C3
NTPCR	84284	0.000188335	2.70939	0.947	0.835	C0		ZC3H13	23091	5.45186e-170	4.32257	0.914	0.685	C1		FDX2	112812	8.89662e-05	-3.72895	0.746	0.638	C2		WDR75	84128	9.80171e-98	-1.43806	0.053	0.4	C3
FOS	2353	3.43153e-59	2.70927	0.957	0.847	C0		KHSRP	8570	1.13596e-195	4.32172	0.866	0.574	C1		PIP4P2	55529	0.00489498	-3.74095	0.486	0.503	C2		SLC25A46	91137	1.71489e-93	-1.43929	0.067	0.407	C3
SKP1	6500	4.04724e-15	2.7085	0.999	0.951	C0		UGP2	7360	2.69924e-167	4.31435	0.968	0.801	C1		RDH14	57665	0.00306314	-3.74713	0.659	0.665	C2		PIP5K1A	8394	5.88253e-60	-1.43974	0.053	0.303	C3
ARF5	381	1.75752e-05	2.69884	0.996	0.907	C0		SCRN1	9805	1.03882e-100	4.31174	0.679	0.431	C1		C15orf40	123207	0.00309191	-3.74928	0.575	0.594	C2		IRF6	3664	3.44732e-76	-1.44093	0.081	0.383	C3
TPBG	7162	3.02455e-64	2.69846	0.941	0.798	C0		ORMDL2	29095	1.28109e-120	4.30663	0.968	0.819	C1		MEST	4232	1.51364e-08	-3.75087	0.552	0.452	C2		COA7	65260	2.20909e-82	-1.44122	0.067	0.38	C3
MAP7	9053	3.83285e-12	2.69606	0.637	0.557	C0		CDIPT	10423	3.10788e-126	4.30181	0.807	0.57	C1		DNAJC8	22826	2.14188e-10	-3.75993	0.847	0.733	C2		TBC1D10B	26000	2.19026e-86	-1.44184	0.071	0.395	C3
C15orf40	123207	2.17186e-07	2.69158	0.639	0.551	C0		FAF2	23197	4.98119e-173	4.28083	0.921	0.718	C1		CUL1	8454	2.73247e-07	-3.76859	0.828	0.723	C2		APEX2	27301	6.40101e-82	-1.44185	0.065	0.378	C3
SPRYD7	57213	2.9172e-06	2.68926	0.81	0.721	C0		TBRG1	84897	3.70886e-36	4.26819	0.42	0.275	C1		CDCA5	113130	1.93691e-11	-3.7763	0.435	0.294	C2		CASP8	841	1.69636e-90	-1.44282	0.08	0.418	C3
AGPAT5	55326	4.94036e-75	2.68324	0.31	0.494	C0		RBFA	79863	1.79809e-261	4.26188	0.898	0.588	C1		WEE1	7465	0.00155876	-3.78646	0.396	0.331	C2		BRAF	673	4.92323e-85	-1.44312	0.089	0.413	C3
CXorf40B	541578	5.96829e-12	2.68035	0.473	0.389	C0		RXRA	6256	4.10077e-82	4.25291	0.87	0.724	C1		AFG3L2	10939	0.00999594	-3.79736	0.624	0.57	C2		KCTD15	79047	3.02705e-75	-1.44433	0.082	0.381	C3
ATP6AP2	10159	5.19279e-40	2.6712	0.874	0.73	C0		VRK1	7443	0	4.2483	0.755	0.231	C1		RIF1	55183	5.79085e-07	-3.79893	0.718	0.622	C2		AC100810.1		9.28079e-96	-1.44521	0.085	0.436	C3
RASSF3	283349	2.50935e-14	2.66838	0.581	0.63	C0		TRAF3IP1	26146	1.37741e-67	4.24295	0.649	0.447	C1		SMARCA5	8467	2.61504e-05	-3.80395	0.843	0.772	C2		RGS20	8601	2.4676e-72	-1.44619	0.051	0.335	C3
ITGAV	3685	4.93481e-20	2.66784	0.638	0.53	C0		SEC11A	23478	0	4.23942	1	0.941	C1		HOOK2	29911	3.75619e-06	-3.80874	0.67	0.681	C2		TFPT	29844	4.06085e-88	-1.44628	0.067	0.393	C3
TXNL1	9352	2.62835e-08	2.65554	0.973	0.856	C0		RAB11B	9230	8.49668e-212	4.23822	0.941	0.739	C1		NAPG	8774	1.44205e-05	-3.81504	0.545	0.574	C2		VPS52	6293	1.17483e-73	-1.44629	0.113	0.414	C3
TINAGL1	64129	1.72476e-45	2.65419	0.714	0.562	C0		LOXL1	4016	5.52772e-144	4.23007	0.893	0.652	C1		LMNB1	4001	1.67472e-55	-3.8168	0.564	0.301	C2		HSD17B11	51170	2.43749e-48	-1.44655	0.053	0.266	C3
PBX1	5087	3.57129e-38	2.65155	0.821	0.684	C0		FBXW5	54461	8.99942e-120	4.22625	0.866	0.651	C1		SEC14L1	6397	1.5372e-07	-3.82306	0.462	0.52	C2		NOA1	84273	6.9965e-82	-1.4472	0.083	0.399	C3
MESD	23184	6.75713e-05	2.64352	0.89	0.808	C0		IFT57	55081	2.51677e-144	4.22124	0.923	0.716	C1		KIFC1	3833	4.00919e-18	-3.82574	0.397	0.244	C2		LACTB	114294	1.30171e-76	-1.44918	0.094	0.397	C3
SYT17	51760	3.40313e-49	2.63637	0.511	0.341	C0		FUBP1	8880	7.41667e-194	4.2189	0.906	0.665	C1		COPS8	10920	0.00461099	-3.83034	0.866	0.765	C2		WIZ	58525	8.23369e-73	-1.44978	0.098	0.392	C3
SLC35A2	7355	4.11999e-70	2.63433	0.722	0.548	C0		GNAI2	2771	1.13919e-132	4.21842	0.9	0.691	C1		PCMTD1	115294	2.60715e-06	-3.83141	0.554	0.589	C2		GRAMD4	23151	1.08877e-57	-1.45092	0.079	0.329	C3
MGAT4A	11320	3.40559e-07	2.63252	0.607	0.548	C0		ALDH3A2	224	1.77295e-191	4.21782	0.986	0.85	C1		SLC11A2	4891	1.23203e-08	-3.83172	0.507	0.552	C2		SOX12	6666	2.02273e-86	-1.45256	0.084	0.41	C3
PDLIM5	10611	2.48858e-16	2.63233	0.723	0.622	C0		DCTN3	11258	1.6673e-181	4.21728	0.98	0.842	C1		DHX9	1660	1.8688e-11	-3.83529	0.882	0.761	C2		WDR36	134430	7.74202e-79	-1.45273	0.119	0.434	C3
ZNRD1	30834	0.00752521	2.62521	0.609	0.596	C0		SERPINH1	871	7.37138e-79	4.21273	0.718	0.523	C1		MANSC1	54682	3.47534e-15	-3.83909	0.726	0.746	C2		LRWD1	222229	9.73263e-97	-1.45274	0.071	0.419	C3
SMAP1	60682	7.06788e-07	2.6139	0.733	0.645	C0		PRPSAP1	5635	8.2288e-234	4.20775	0.911	0.655	C1		MIA3	375056	0.00104616	-3.84396	0.685	0.68	C2		CCDC93	54520	4.95083e-77	-1.4532	0.083	0.385	C3
LSG1	55341	0.00590196	2.61075	0.567	0.522	C0		ABI2	10152	6.62113e-148	4.20471	0.809	0.545	C1		MXD4	10608	1.90508e-24	-3.85628	0.623	0.698	C2		TMEM218	219854	9.81832e-95	-1.45338	0.061	0.402	C3
LRIF1	55791	0.00921349	2.60612	0.746	0.663	C0		C2orf69	205327	8.87974e-194	4.20288	0.605	0.257	C1		PISD	23761	1.43308e-08	-3.85817	0.34	0.407	C2		SMKR1	100287482	1.55937e-68	-1.45341	0.079	0.359	C3
CUL4B	8450	4.17222e-08	2.60516	0.714	0.635	C0		PCBP2	5094	0	4.20273	1	0.943	C1		OBSL1	23363	5.27336e-16	-3.86657	0.549	0.633	C2		TCHP	84260	8.77406e-58	-1.45382	0.107	0.365	C3
TMEM185A	84548	8.98137e-09	2.57618	0.451	0.375	C0		ARHGDIB	397	3.04655e-106	4.20049	0.722	0.485	C1		RNF217	154214	0.00207939	-3.86778	0.224	0.267	C2		TYSND1	219743	1.02975e-73	-1.45473	0.078	0.372	C3
AKIRIN1	79647	2.31327e-10	2.57444	0.834	0.722	C0		E2F8	79733	0	4.19511	0.838	0.182	C1		MAN1A1	4121	7.21185e-19	-3.86846	0.352	0.47	C2		KAT8	84148	7.70353e-96	-1.45529	0.091	0.44	C3
VEGFB	7423	1.96858e-08	2.55789	0.92	0.805	C0		STIL	6491	0	4.19389	0.665	0.136	C1		UBAC2	337867	2.1014e-05	-3.88717	0.767	0.76	C2		URGCP	55665	8.09894e-87	-1.45532	0.072	0.398	C3
RSL1D1	26156	3.0265e-11	2.55654	0.935	0.856	C0		ANAPC15	25906	3.49967e-264	4.1762	0.981	0.821	C1		MAGED1	9500	5.44647e-12	-3.89432	0.216	0.303	C2		NUP85	79902	4.6932e-70	-1.45534	0.071	0.353	C3
SMAD5	4090	0.000959282	2.54921	0.806	0.716	C0		BUB1B	701	0	4.17515	0.473	0.084	C1		NDC1	55706	2.28667e-17	-3.90256	0.652	0.492	C2		ACYP2	98	1.61309e-73	-1.45539	0.107	0.409	C3
SDC3	9672	2.44609e-07	2.54853	0.384	0.329	C0		AAK1	22848	4.21231e-97	4.16916	0.771	0.555	C1		BCLAF1	9774	1.18168e-11	-3.91837	0.902	0.79	C2		KMT5C	84787	1.99815e-81	-1.45585	0.068	0.377	C3
SSH3	54961	3.78797e-18	2.53599	0.741	0.634	C0		RCC2	55920	1.22309e-205	4.1624	0.888	0.607	C1		HSPBP1	23640	0.00374623	-3.9248	0.734	0.653	C2		NUP50-DT	100506714	1.36065e-66	-1.45589	0.07	0.343	C3
AP1AR	55435	9.29185e-13	2.53013	0.8	0.707	C0		SEC13	6396	1.05421e-64	4.16035	0.749	0.57	C1		SMURF1	57154	1.67894e-08	-3.92738	0.45	0.502	C2		AC009403.1		1.22073e-74	-1.45698	0.078	0.373	C3
FAM136A	84908	3.4199e-15	2.52612	0.843	0.801	C0		TAX1BP1	8887	2.77516e-112	4.15713	0.998	0.931	C1		ATP2C1	27032	6.44358e-05	-3.92975	0.576	0.603	C2		LINC01234	100506465	9.96074e-81	-1.45743	0.077	0.388	C3
AHR	196	0.00177238	2.52608	0.683	0.616	C0		GTPBP4	23560	3.61479e-206	4.15347	0.957	0.769	C1		TLE1	7088	4.99422e-05	-3.93149	0.53	0.575	C2		ASCC1	51008	7.85209e-101	-1.45773	0.076	0.436	C3
HBP1	26959	3.27074e-61	2.48545	0.666	0.476	C0		TXLNG	55787	2.2161e-265	4.14848	0.854	0.513	C1		IL13RA1	3597	8.66112e-08	-3.93267	0.613	0.642	C2		AGAP3	116988	1.14387e-78	-1.45863	0.111	0.422	C3
SFR1	119392	4.74942e-35	2.48144	0.232	0.352	C0		ACBD6	84320	8.56555e-157	4.14716	0.848	0.586	C1		TEX264	51368	0.00070978	-3.94142	0.746	0.732	C2		TBCC	6903	8.38294e-111	-1.45979	0.05	0.428	C3
TOR1AIP2	163590	6.75384e-05	2.48087	0.753	0.677	C0		NSD2	7468	0	4.14125	0.717	0.238	C1		TCAF1	9747	0.000556673	-3.9441	0.578	0.609	C2		ADPGK	83440	1.81748e-96	-1.46215	0.081	0.431	C3
CTBS	1486	2.25908e-26	2.46245	0.698	0.575	C0		HDDC3	374659	1.34984e-119	4.13741	0.791	0.542	C1		TMEM160	54958	0.000760437	-3.95289	0.894	0.794	C2		CDKN2AIP	55602	3.41373e-65	-1.46219	0.055	0.321	C3
MAGT1	84061	1.77561e-07	2.45545	0.782	0.693	C0		UBTF	7343	8.40736e-197	4.13514	0.826	0.528	C1		PSENEN	55851	0.000746473	-3.9542	0.834	0.793	C2		COA6-AS1	101927765	6.73046e-67	-1.46245	0.055	0.325	C3
NOG	9241	0.000450757	2.44997	0.425	0.452	C0		MTFP1	51537	1.23726e-249	4.1335	0.722	0.333	C1		SPRY1	10252	2.14613e-09	-3.95608	0.317	0.39	C2		ATG9A	79065	7.28044e-93	-1.46324	0.072	0.411	C3
MUC16	94025	2.52246e-91	2.44752	0.761	0.56	C0		PRPF8	10594	1.2715e-153	4.13285	0.913	0.699	C1		PALLD	23022	4.45146e-05	-3.95662	0.775	0.675	C2		MTM1	4534	3.14817e-78	-1.46357	0.08	0.387	C3
CHCHD6	84303	0.000145071	2.41987	0.743	0.663	C0		VPS51	738	1.96125e-87	4.13281	0.884	0.7	C1		NCAPD3	23310	2.05751e-12	-3.97193	0.538	0.397	C2		EP400	57634	6.23653e-83	-1.4637	0.085	0.404	C3
MAN1A1	4121	5.71827e-27	2.41869	0.513	0.398	C0		DTL	51514	0	4.12622	0.476	0.088	C1		CHP1	11261	3.4133e-06	-3.97491	0.623	0.643	C2		SURF6	6838	1.45151e-87	-1.46385	0.097	0.43	C3
SREBF2	6721	6.34331e-12	2.4064	0.695	0.604	C0		GP1BB	2812	2.22696e-67	4.12531	0.69	0.471	C1		TMEM245	23731	1.66134e-06	-3.97535	0.645	0.655	C2		RASEF	158158	7.59224e-74	-1.46399	0.1	0.398	C3
DEGS2	123099	2.83106e-13	2.40524	0.306	0.234	C0		TMED5	50999	2.01305e-131	4.12456	0.926	0.759	C1		PUM1	9698	1.8851e-05	-3.99014	0.75	0.73	C2		MAN2B1	4125	9.00363e-91	-1.46432	0.077	0.411	C3
INPP4B	8821	3.37501e-65	2.4021	0.453	0.271	C0		NECTIN1	5818	3.51464e-41	4.12362	0.396	0.238	C1		FUOM	282969	4.21206e-09	-3.99725	0.523	0.58	C2		ACOT11	26027	3.42903e-67	-1.46528	0.057	0.326	C3
ERGIC1	57222	7.01047e-08	2.391	0.735	0.649	C0		LARP7	51574	8.39649e-211	4.12324	0.936	0.713	C1		CREB3L2	64764	3.32371e-07	-4.00549	0.47	0.526	C2		HAUS6	54801	2.98177e-75	-1.4658	0.079	0.377	C3
DPF2	5977	6.45213e-06	2.3789	0.717	0.629	C0		AGGF1	55109	5.23378e-143	4.12284	0.805	0.545	C1		TMC4	147798	8.29655e-23	-4.00975	0.49	0.595	C2		BCL7A	605	4.68896e-77	-1.46647	0.088	0.393	C3
EHBP1	23301	4.97282e-23	2.37568	0.671	0.561	C0		CCDC167	154467	4.48018e-128	4.12161	0.897	0.709	C1		SARAF	51669	0.000207864	-4.02215	0.95	0.884	C2		DNAAF2	55172	7.93239e-94	-1.46827	0.118	0.466	C3
PMEL	6490	5.84265e-10	2.35662	0.429	0.361	C0		CISD2	493856	0	4.12018	0.957	0.683	C1		SREBF2	6721	5.12756e-06	-4.05394	0.63	0.648	C2		UACA	55075	5.58285e-51	-1.47033	0.096	0.33	C3
N4BP2L2	10443	5.36718e-36	2.35295	0.866	0.717	C0		RYK	6259	2.55275e-219	4.1181	0.938	0.717	C1		PCYT2	5833	8.93576e-21	-4.05517	0.484	0.59	C2		KLC2	64837	4.30992e-69	-1.47182	0.064	0.34	C3
MFHAS1	9258	9.62923e-13	2.34676	0.272	0.346	C0		SHPRH	257218	7.73216e-40	4.11738	0.442	0.283	C1		SMARCB1	6598	0.00592241	-4.05531	0.837	0.744	C2		UBL7	84993	1.25687e-93	-1.47254	0.08	0.423	C3
FEM1B	10116	9.06123e-05	2.34371	0.42	0.371	C0		METTL23	124512	1.0319e-246	4.1088	0.946	0.703	C1		RBM12	10137	0.000765584	-4.05643	0.555	0.492	C2		TMEM44-AS1	100507297	5.47732e-73	-1.47261	0.059	0.347	C3
TYMSOS	494514	6.38174e-127	2.34041	0.075	0.295	C0		FNBP1L	54874	7.40185e-99	4.10476	0.796	0.583	C1		DHX29	54505	0.000558696	-4.05867	0.827	0.734	C2		SBNO2	22904	1.80582e-87	-1.47338	0.071	0.399	C3
PEX16	9409	4.36438e-42	2.33917	0.811	0.655	C0		PANK2	80025	2.66889e-250	4.09754	0.901	0.601	C1		CENPH	64946	1.5265e-51	-4.07688	0.787	0.489	C2		PCMTD2	55251	3.55617e-87	-1.47433	0.095	0.423	C3
OBSL1	23363	1.00333e-53	2.33572	0.71	0.543	C0		HUS1	3364	5.26577e-142	4.09673	0.779	0.512	C1		CHST11	50515	4.69277e-06	-4.08092	0.47	0.515	C2		TCFL5	10732	6.99419e-85	-1.47439	0.094	0.419	C3
SRP54	6729	1.31298e-13	2.33173	0.882	0.759	C0		MRTO4	51154	5.40276e-282	4.09563	0.916	0.598	C1		CTBS	1486	4.11837e-05	-4.10709	0.617	0.634	C2		ARAP1	116985	1.7391e-83	-1.47492	0.074	0.391	C3
CAMK2D	817	9.29328e-42	2.32871	0.497	0.346	C0		SENP6	26054	1.41786e-104	4.09283	0.753	0.527	C1		CHST12	55501	3.74831e-05	-4.10921	0.6	0.622	C2		MORC2	22880	5.59976e-89	-1.4751	0.096	0.431	C3
NOTCH3	4854	9.88775e-32	2.3266	0.616	0.495	C0		ZNF467	168544	6.18012e-06	4.09038	0.555	0.499	C1		TBC1D9	23158	4.97679e-15	-4.1095	0.311	0.416	C2		MECR	51102	1.80243e-102	-1.47645	0.057	0.415	C3
KCNS3	3790	1.59486e-05	2.32387	0.256	0.299	C0		BSG	682	2.34128e-282	4.08984	1	0.938	C1		DLGAP4	22839	1.86458e-05	-4.11552	0.626	0.637	C2		SPATA13	221178	3.71768e-82	-1.47717	0.098	0.416	C3
LUZP1	7798	0.00451834	2.3118	0.367	0.392	C0		BORA	79866	3.27275e-197	4.08169	0.386	0.094	C1		CIAPIN1	57019	5.94784e-07	-4.12101	0.882	0.765	C2		PTGR2	145482	5.84731e-95	-1.4772	0.069	0.413	C3
ARRDC1	92714	1.9457e-18	2.31024	0.921	0.779	C0		CAPZA1	829	1.70145e-254	4.07998	0.997	0.908	C1		CYB561D2.ENSG00000114395		1.40838e-05	-4.12508	0.558	0.589	C2		SEC23A	10484	3.05491e-94	-1.4777	0.08	0.427	C3
STMN3	50861	1.49693e-11	2.3062	0.518	0.435	C0		NCAPH2	29781	0	4.07657	0.816	0.357	C1		CHTOP	26097	4.93433e-14	-4.12537	0.718	0.74	C2		LSM14B	149986	5.55373e-71	-1.47808	0.118	0.413	C3
MTHFS	10588	1.42091e-08	2.29073	0.779	0.743	C0		FAM168B	130074	4.69409e-165	4.07644	0.804	0.517	C1		UCK2	7371	0.00672906	-4.13642	0.614	0.534	C2		C18orf21	83608	3.3797e-88	-1.47815	0.078	0.408	C3
PCDH7	5099	1.59671e-19	2.28925	0.51	0.405	C0		MRPL58	3396	1.31803e-225	4.07521	0.952	0.771	C1		SLC31A1	1317	0.00704624	-4.13967	0.511	0.525	C2		PWWP3A	84939	2.35455e-91	-1.47881	0.094	0.432	C3
ATP2C1	27032	0.0001928	2.28505	0.63	0.572	C0		MRPS31	10240	6.89963e-149	4.07224	0.83	0.574	C1		PSPH	5723	7.04369e-06	-4.14911	0.791	0.691	C2		NLN	57486	2.20359e-78	-1.47921	0.091	0.399	C3
GAREM1	64762	1.10054e-20	2.27842	0.427	0.327	C0		ARL6IP6	151188	2.18838e-251	4.06801	0.739	0.353	C1		SRPK2	6733	6.17896e-08	-4.15932	0.707	0.721	C2		SNX15	29907	1.12703e-91	-1.47933	0.074	0.412	C3
DNTTIP2	30836	6.234e-05	2.27695	0.827	0.75	C0		ARPC2	10109	0	4.06639	1	0.952	C1		FRMD4B	23150	5.96352e-10	-4.16001	0.476	0.535	C2		ERLIN1	10613	4.17158e-85	-1.48078	0.1	0.426	C3
LIPH	200879	3.43879e-18	2.2769	0.466	0.365	C0		YDJC	150223	3.65052e-217	4.05552	0.862	0.576	C1		STX8	9482	1.54545e-07	-4.16162	0.638	0.668	C2		ATPSCKMT	134145	2.97216e-87	-1.48132	0.055	0.378	C3
TCAF1	9747	1.53231e-05	2.27278	0.647	0.567	C0		IDH1	3417	4.55219e-60	4.05425	0.952	0.828	C1		JDP2	122953	9.07786e-16	-4.17052	0.396	0.287	C2		GTF3C4	9329	1.6994e-88	-1.48135	0.08	0.414	C3
PLEKHF2	79666	2.74982e-26	2.27063	0.766	0.638	C0		HMCES	56941	3.3118e-266	4.05316	0.846	0.485	C1		NIPAL2	79815	7.18134e-09	-4.17571	0.536	0.581	C2		UBALD1	124402	5.69248e-48	-1.48176	0.054	0.267	C3
DYRK4	8798	0.000367085	2.27023	0.428	0.382	C0		AC009275.1		4.32423e-132	4.05315	0.631	0.343	C1		NPM3	10360	0.00299687	-4.17661	0.702	0.627	C2		IPO4	79711	2.93165e-93	-1.48218	0.078	0.421	C3
LETMD1	25875	1.83768e-17	2.25538	0.62	0.514	C0		ICMT	23463	5.0922e-228	4.05083	0.778	0.414	C1		ERGIC1	57222	0.00759127	-4.17903	0.707	0.684	C2		PARVA	55742	1.10417e-74	-1.48241	0.091	0.389	C3
PTPRA	5786	0.00568084	2.248	0.768	0.714	C0		TNPO1	3842	6.35697e-267	4.05001	0.946	0.694	C1		OTUD6B-AS1	100506365	0.00136959	-4.18137	0.739	0.725	C2		FGD6	55785	8.05816e-81	-1.48312	0.092	0.409	C3
CALD1	800	4.52879e-05	2.2448	0.584	0.53	C0		GANAB	23193	5.21804e-183	4.0484	0.866	0.611	C1		TMEM109	79073	8.74379e-07	-4.18993	0.846	0.727	C2		SLC25A40	55972	2.52859e-80	-1.48346	0.073	0.382	C3
AKAP13	11214	4.73846e-06	2.23625	0.463	0.411	C0		TPD52	7163	9.73936e-245	4.0402	0.995	0.883	C1		EIF4H	7458	4.01679e-07	-4.21159	0.93	0.855	C2		CARM1	10498	2.27099e-86	-1.48351	0.097	0.424	C3
GRAMD1A	57655	2.97264e-17	2.22844	0.618	0.512	C0		NDUFA5	4698	1.72142e-166	4.03591	0.967	0.808	C1		DMAC2L	27109	1.71583e-05	-4.21253	0.694	0.701	C2		TMEM161B	153396	1.08291e-95	-1.48438	0.076	0.423	C3
GOLGA3	2802	1.33558e-19	2.22541	0.625	0.519	C0		PPP6C	5537	2.74349e-146	4.03144	0.894	0.683	C1		SMC1A	8243	2.68993e-07	-4.214	0.658	0.553	C2		FBH1	84893	2.53875e-99	-1.48464	0.073	0.429	C3
PGM1	5236	2.49863e-13	2.20448	0.825	0.716	C0		TMX1	81542	4.85973e-273	4.02617	0.949	0.697	C1		ZNF106	64397	6.60084e-07	-4.23617	0.643	0.542	C2		PDCD11	22984	2.6664e-77	-1.48718	0.095	0.4	C3
PNPLA4	8228	3.01491e-15	2.19013	0.68	0.567	C0		CHMP1B	57132	2.87909e-78	4.02275	0.866	0.688	C1		SLC31A2	1318	1.23943e-13	-4.23966	0.285	0.38	C2		CTSF	8722	4.80632e-68	-1.48818	0.068	0.343	C3
ARMC10	83787	2.32228e-06	2.18578	0.909	0.79	C0		SNF8	11267	2.58983e-234	4.02129	0.989	0.861	C1		POLD3	10714	0.00333788	-4.24434	0.476	0.412	C2		SIN3A	25942	2.11225e-86	-1.48878	0.087	0.417	C3
CHP1	11261	3.31036e-34	2.18546	0.711	0.581	C0		ANKRD17	26057	8.44578e-56	4.01869	0.659	0.476	C1		PCDH7	5099	8.08375e-11	-4.25246	0.38	0.467	C2		AUH	549	6.64701e-96	-1.48941	0.081	0.429	C3
GPAT3	84803	0.00022933	2.18214	0.269	0.31	C0		RHOBTB3	22836	1.29665e-182	4.01449	0.806	0.502	C1		HLTF	6596	1.78801e-18	-4.25968	0.784	0.62	C2		ATAD2B	54454	6.41522e-48	-1.48956	0.057	0.271	C3
SGTA	6449	2.61835e-09	2.17575	0.395	0.443	C0		RTF2	51507	5.01146e-207	4.00983	0.996	0.89	C1		MFSD10	10227	0.000361806	-4.26731	0.848	0.798	C2		ZNF585A	199704	4.19317e-80	-1.48967	0.058	0.364	C3
UBTD2	92181	5.49974e-05	2.16812	0.291	0.249	C0		NELFE	7936	1.15075e-230	4.00743	0.948	0.729	C1		GP1BB	2812	1.78673e-06	-4.27233	0.489	0.532	C2		OMA1	115209	1.52974e-97	-1.49003	0.069	0.419	C3
HMGCR	3156	1.70415e-39	2.16043	0.849	0.717	C0		SNAPIN	23557	5.4906e-173	3.99914	0.89	0.668	C1		RPA2	6118	1.24586e-05	-4.2895	0.481	0.404	C2		DNASE1L1	1774	1.18806e-75	-1.49035	0.096	0.398	C3
PNN	5411	5.15012e-58	2.15499	0.746	0.771	C0		ZDHHC20	253832	3.05986e-102	3.99764	0.616	0.373	C1		CLIP4	79745	2.22568e-05	-4.29137	0.52	0.552	C2		PIGC	5279	1.33646e-70	-1.49084	0.095	0.384	C3
EPCAM	4072	4.94745e-34	2.15439	0.986	0.913	C0		B3GNT3	10331	1.20887e-120	3.99764	0.867	0.667	C1		PIN1	5300	4.82697e-05	-4.3185	0.879	0.789	C2		RAC3	5881	4.59499e-90	-1.49148	0.05	0.378	C3
TLE1	7088	1.29362e-15	2.14992	0.622	0.522	C0		SFXN1	94081	3.58342e-227	3.99757	0.891	0.6	C1		RNF213	57674	4.5019e-06	-4.32355	0.618	0.635	C2		CARNMT1	138199	3.24019e-69	-1.49191	0.126	0.417	C3
NCOA5	57727	3.18332e-11	2.14816	0.356	0.417	C0		PJA1	64219	7.75943e-49	3.99666	0.654	0.481	C1		ATP6AP2	10159	2.23059e-10	-4.32629	0.813	0.792	C2		MFSD4B	91749	4.69716e-66	-1.49254	0.069	0.341	C3
PANX1	24145	3.25723e-06	2.14739	0.342	0.294	C0		SH3TC2-DT	255187	2.63511e-48	3.99115	0.327	0.169	C1		MAP7	9053	5.27646e-06	-4.34742	0.57	0.598	C2		PPP1R12B	4660	6.97018e-51	-1.49429	0.044	0.263	C3
FUOM	282969	8.93122e-23	2.14719	0.638	0.515	C0		EAPP	55837	1.01069e-137	3.99084	0.95	0.797	C1		DHX15	1665	0.00273466	-4.35958	0.831	0.74	C2		ZNF444	55311	4.76276e-101	-1.49509	0.062	0.42	C3
RBMX2	51634	2.94289e-06	2.14426	0.818	0.761	C0		CASP8AP2	9994	1.31485e-188	3.99081	0.646	0.302	C1		CCNE2	9134	3.27122e-09	-4.36622	0.37	0.268	C2		PPP5C	5536	1.06895e-77	-1.49523	0.096	0.402	C3
MITF	4286	0.000450602	2.14387	0.264	0.296	C0		MSI2	124540	2.28026e-63	3.99075	0.473	0.27	C1		CCSER2	54462	3.5386e-07	-4.38075	0.582	0.613	C2		QTRT2	79691	2.11849e-67	-1.49543	0.086	0.365	C3
STIM2	57620	0.00207681	2.14268	0.224	0.253	C0		FAT1	2195	7.6904e-145	3.98759	0.838	0.591	C1		FAM110A	83541	4.4353e-11	-4.39034	0.69	0.708	C2		PSEN2	5664	2.94698e-101	-1.49677	0.071	0.43	C3
MROH6	642475	6.04005e-05	2.14139	0.798	0.709	C0		PAM	5066	2.95166e-44	3.98021	0.502	0.337	C1		PCNX3	399909	0.000227339	-4.39975	0.668	0.666	C2		LIN9	286826	5.7483e-59	-1.49719	0.064	0.313	C3
IL1R1	3554	2.24072e-11	2.13427	0.349	0.277	C0		DCTN6	10671	6.69903e-192	3.97738	0.972	0.806	C1		STK16	8576	8.71902e-06	-4.40332	0.668	0.674	C2		TRIM47	91107	3.8313e-83	-1.49729	0.06	0.373	C3
ERN1	2081	8.12625e-12	2.1305	0.284	0.218	C0		TMEM159	57146	7.91092e-32	3.97677	0.632	0.511	C1		PRR15	222171	0.00161747	-4.40665	0.403	0.432	C2		ZMIZ2	83637	8.97354e-80	-1.49746	0.098	0.411	C3
NRIP1	8204	7.08696e-17	2.13033	0.323	0.243	C0		RTL8B	441518	9.67722e-78	3.97635	0.687	0.474	C1		RNF24	11237	6.85655e-09	-4.41063	0.867	0.824	C2		SUMF1	285362	9.33572e-86	-1.50111	0.082	0.41	C3
DENND11	57189	1.63187e-14	2.11717	0.474	0.385	C0		HAUS4	54930	4.34417e-290	3.97451	0.919	0.607	C1		RNF187	149603	1.97947e-07	-4.41525	0.89	0.848	C2		RNF41	10193	8.39189e-81	-1.50127	0.082	0.395	C3
STARD10	10809	6.19564e-44	2.11549	0.99	0.906	C0		BRMS1	25855	1.501e-229	3.96787	0.943	0.706	C1		SEMA5A	9037	6.0932e-27	-4.42089	0.28	0.429	C2		ZNF749	388567	1.19733e-72	-1.5015	0.045	0.328	C3
BCAS4	55653	3.53059e-26	2.11375	0.662	0.532	C0		TMEM126A	84233	1.71693e-223	3.96687	0.968	0.787	C1		SNX24	28966	8.48616e-05	-4.42897	0.554	0.565	C2		NOP2	4839	4.93141e-92	-1.50253	0.068	0.405	C3
PLA2G12A	81579	0.000327782	2.11216	0.657	0.588	C0		TIMM23	100287932	5.12724e-213	3.9604	0.926	0.667	C1		AOPEP	84909	3.17745e-05	-4.44689	0.634	0.55	C2		ELP6	54859	1.72993e-90	-1.50362	0.071	0.406	C3
CBX4	8535	0.000109174	2.11025	0.472	0.421	C0		SLC66A2	80148	2.81921e-70	3.95802	0.699	0.497	C1		STX16	8675	0.000777041	-4.44954	0.777	0.756	C2		ARL17A	51326	2.56497e-94	-1.50402	0.058	0.397	C3
NFIL3	4783	1.80099e-06	2.10727	0.368	0.313	C0		GEMIN2	8487	1.19006e-216	3.95786	0.715	0.356	C1		GDE1	51573	8.29172e-05	-4.46062	0.828	0.79	C2		NEDD1	121441	1.0255e-71	-1.50445	0.071	0.356	C3
TAF13	6884	7.33572e-28	2.09975	0.647	0.53	C0		AIF1L	83543	1.88356e-120	3.95389	0.735	0.473	C1		PFDN1	5201	0.0050249	-4.4659	0.844	0.761	C2		SRRD	402055	2.06371e-97	-1.50483	0.062	0.411	C3
CTU2	348180	1.83553e-13	2.09672	0.381	0.442	C0		COMMD3	23412	1.18113e-112	3.95264	0.82	0.589	C1		TMEM30A	55754	0.000419347	-4.47502	0.729	0.725	C2		PHC3	80012	5.34808e-95	-1.50547	0.098	0.447	C3
PSENEN	55851	1.07152e-33	2.09225	0.891	0.724	C0		NDUFS1	4719	2.97976e-141	3.95147	0.883	0.675	C1		CNGA1	1259	4.24123e-10	-4.51285	0.27	0.349	C2		NECAP1	25977	3.4779e-94	-1.50612	0.07	0.413	C3
FOSL2	2355	7.51281e-11	2.08623	0.581	0.497	C0		POC1A	25886	0	3.94652	0.743	0.268	C1		XRCC5	7520	5.29984e-10	-4.51535	0.995	0.925	C2		SEC24C	9632	5.2547e-89	-1.50737	0.112	0.449	C3
FOXJ3	22887	1.71545e-06	2.07674	0.492	0.434	C0		RFC5	5985	0	3.94082	0.826	0.275	C1		TTK	7272	5.9005e-57	-4.51815	0.481	0.242	C2		TBL2	26608	1.17297e-91	-1.50836	0.117	0.46	C3
KITLG	4254	0.000303592	2.07631	0.399	0.35	C0		B3GAT3	26229	8.42434e-269	3.93748	0.913	0.625	C1		TFRC	7037	0.000312903	-4.52724	0.766	0.688	C2		LRRC23	10233	8.44297e-101	-1.50868	0.076	0.436	C3
TIMM9	26520	5.82887e-09	2.07376	0.651	0.65	C0		PDE6D	5147	1.79243e-175	3.93631	0.855	0.59	C1		MCM5	4174	5.6115e-25	-4.5357	0.563	0.375	C2		ARPIN	348110	1.27843e-79	-1.50916	0.086	0.397	C3
CYTH2	9266	7.53013e-23	2.07258	0.654	0.54	C0		ECI2	10455	5.15191e-153	3.93554	0.831	0.556	C1		SEC16A	9919	4.4571e-05	-4.54042	0.405	0.458	C2		ABHD13	84945	1.03925e-93	-1.50923	0.075	0.416	C3
KRAS	3845	3.70594e-08	2.06692	0.946	0.855	C0		ZFAND2B	130617	1.7232e-189	3.93543	0.886	0.619	C1		DSCC1	79075	2.973e-13	-4.55465	0.466	0.31	C2		NME6	10201	1.28506e-83	-1.50968	0.097	0.42	C3
RBM15	64783	1.36714e-11	2.06633	0.206	0.269	C0		PET100	100131801	1.08903e-267	3.93054	0.999	0.908	C1		UNG	7374	1.8056e-05	-4.55942	0.583	0.513	C2		SLC2A10	81031	1.50688e-64	-1.50974	0.058	0.321	C3
EIF2AK2	5610	4.51965e-20	2.05312	0.792	0.774	C0		AKT1	207	2.84061e-244	3.92663	0.895	0.597	C1		KMT2C	58508	1.29127e-09	-4.56189	0.819	0.8	C2		IMMP2L	83943	3.61258e-92	-1.51061	0.061	0.396	C3
CCT2	10576	1.06791e-33	2.05219	0.975	0.89	C0		THUMPD3	25917	1.79704e-130	3.92492	0.748	0.477	C1		U62317.1		3.80633e-15	-4.56199	0.25	0.354	C2		SCAF1	58506	1.76567e-106	-1.5119	0.078	0.449	C3
PRSS21	10942	0.000461802	2.04818	0.541	0.481	C0		IFT22	64792	2.3172e-195	3.91946	0.915	0.703	C1		ATP2A2	488	0.00176055	-4.56564	0.857	0.811	C2		CEP70	80321	3.22578e-70	-1.51195	0.054	0.333	C3
TP53TG1	11257	1.02524e-15	2.04712	0.928	0.823	C0		FOPNL	123811	8.96005e-261	3.91938	0.948	0.734	C1		SCAF11	9169	0.00614022	-4.57007	0.884	0.799	C2		IL17RC	84818	1.44997e-79	-1.51237	0.075	0.382	C3
HYAL2	8692	1.93892e-13	2.04397	0.638	0.538	C0		RPE	6120	6.83659e-201	3.9117	0.89	0.615	C1		SNTB2	6645	0.000806884	-4.57015	0.628	0.627	C2		OBI1	79596	1.42842e-87	-1.51281	0.09	0.423	C3
ZNF106	64397	2.45915e-75	2.03767	0.482	0.623	C0		SNRNP40	9410	0	3.90572	0.848	0.449	C1		CYSRT1	375791	0.00407848	-4.57164	0.455	0.475	C2		COQ7	10229	1.52275e-98	-1.51396	0.048	0.396	C3
PPP1R15B	84919	5.87355e-12	2.0347	0.628	0.549	C0		OTUD6B-AS1	100506365	2.44351e-126	3.89227	0.878	0.678	C1		SARNP	84324	0.00353068	-4.58548	0.875	0.787	C2		SLC7A6	9057	8.23833e-71	-1.51443	0.082	0.368	C3
GALM	130589	3.98951e-11	2.02739	0.605	0.516	C0		TMEM245	23731	8.98535e-158	3.88857	0.851	0.59	C1		STT3B	201595	0.000131967	-4.59118	0.797	0.765	C2		PNPO	55163	2.28453e-70	-1.51516	0.108	0.399	C3
MKNK2	2872	4.1144e-12	2.02117	0.603	0.52	C0		TAB2	23118	4.48209e-98	3.88778	0.807	0.596	C1		KIF18A	81930	4.77165e-24	-4.60379	0.32	0.184	C2		DPH2	1802	4.44696e-77	-1.51548	0.069	0.369	C3
AFTPH	54812	2.46494e-10	2.00785	0.735	0.646	C0		MFSD10	10227	9.21889e-136	3.88731	0.941	0.763	C1		GNG4	2786	0.00017804	-4.60795	0.558	0.482	C2		MIPEP	4285	1.38786e-95	-1.51554	0.106	0.461	C3
CHAMP1	283489	3.09681e-24	1.99999	0.468	0.541	C0		TNPO3	23534	8.30571e-167	3.88056	0.765	0.466	C1		CSTF3	1479	0.00258688	-4.61788	0.627	0.564	C2		C19orf12	83636	3.50238e-72	-1.51675	0.084	0.377	C3
SCOC	60592	3.21768e-06	1.99569	0.933	0.81	C0		SKP2	6502	0	3.87871	0.843	0.386	C1		CERCAM	51148	8.82734e-15	-4.6181	0.58	0.63	C2		TIFA	92610	4.07464e-65	-1.51742	0.086	0.356	C3
EFCAB14	9813	5.73555e-38	1.99464	0.922	0.813	C0		CHRAC1	54108	2.55208e-246	3.86354	0.89	0.579	C1		IFT22	64792	0.00117255	-4.61861	0.837	0.738	C2		RAB35	11021	1.22712e-79	-1.51762	0.094	0.405	C3
SHROOM3	57619	3.90176e-20	1.97097	0.611	0.518	C0		DAZAP1	26528	1.67988e-211	3.86247	0.914	0.677	C1		TRIP13	9319	6.79037e-62	-4.63517	0.708	0.377	C2		TIMELESS	8914	1.2551e-51	-1.51793	0.104	0.34	C3
CYB5D2	124936	5.05936e-05	1.9657	0.366	0.321	C0		FAF1	11124	6.24193e-248	3.86117	0.881	0.585	C1		SLC27A4	10999	1.10287e-09	-4.63879	0.349	0.422	C2		TMEM191C	645426	2.76037e-96	-1.51855	0.062	0.407	C3
HDAC5	10014	3.67337e-31	1.96451	0.467	0.336	C0		HERC4	26091	2.38002e-51	3.85762	0.859	0.704	C1		RSL1D1	26156	1.90403e-13	-4.63924	0.96	0.878	C2		HMGCL	3155	3.09121e-94	-1.52211	0.064	0.407	C3
FAM189B	10712	0.00576857	1.96379	0.278	0.304	C0		HMGXB4	10042	3.33255e-204	3.8553	0.853	0.573	C1		VPS51	738	1.587e-09	-4.65079	0.746	0.745	C2		ESCO1	114799	1.12113e-78	-1.52353	0.081	0.387	C3
OS9	10956	8.65343e-20	1.96224	0.755	0.647	C0		ACO2	50	2.46663e-154	3.85244	0.924	0.725	C1		SND1	27044	5.38104e-12	-4.65889	0.73	0.752	C2		PHF1	5252	5.38787e-86	-1.52406	0.052	0.372	C3
TTYH3	80727	9.23643e-07	1.95775	0.593	0.526	C0		MSL1	339287	7.49857e-110	3.85192	0.699	0.453	C1		ANO1	55107	0.000624179	-4.65914	0.708	0.615	C2		LRRC47	57470	4.05196e-99	-1.52752	0.072	0.426	C3
WDR53	348793	0.000473861	1.95633	0.261	0.292	C0		CDC27	996	3.14509e-166	3.84963	0.811	0.546	C1		EXOSC8	11340	7.68149e-43	-4.66382	0.851	0.633	C2		NUFIP1	26747	4.76935e-79	-1.52785	0.077	0.385	C3
SLC45A4	57210	9.45987e-06	1.95169	0.38	0.332	C0		RNF126	55658	2.81366e-274	3.84222	0.955	0.714	C1		MRPS2	51116	1.9709e-09	-4.66797	0.89	0.763	C2		SUPT7L	9913	9.78493e-85	-1.52977	0.07	0.389	C3
EIF4EBP1	1978	6.73851e-55	1.93894	0.787	0.792	C0		TRAK2	66008	1.04567e-49	3.84019	0.622	0.446	C1		CEBPD	1052	0.00200374	-4.66844	0.555	0.575	C2		SPRYD4	283377	2.33352e-99	-1.53051	0.072	0.427	C3
WLS	79971	6.37643e-11	1.93397	0.576	0.494	C0		ARNT2	9915	6.59334e-134	3.83467	0.376	0.124	C1		ZNF703	80139	1.95734e-15	-4.68023	0.345	0.45	C2		KIF13B	23303	1.95591e-79	-1.53116	0.092	0.402	C3
ZNHIT3	9326	1.04561e-07	1.93369	0.879	0.765	C0		PRPF4B	8899	4.05684e-143	3.83251	0.848	0.61	C1		TACC1	6867	0.000565017	-4.68257	0.427	0.363	C2		ZFP64	55734	1.82427e-93	-1.53149	0.1	0.445	C3
DEDD2	162989	0.000690086	1.91723	0.382	0.339	C0		PHF3	23469	1.36336e-119	3.82762	0.754	0.51	C1		BAZ1B	9031	6.05793e-22	-4.68693	0.838	0.68	C2		C11orf80	79703	2.31195e-99	-1.53155	0.076	0.43	C3
SERTAD2	9792	0.000731213	1.90532	0.518	0.468	C0		TADA3	10474	1.83171e-104	3.82688	0.806	0.564	C1		GLA	2717	5.32701e-19	-4.68876	0.671	0.489	C2		TMEM51	55092	6.12124e-68	-1.53208	0.069	0.343	C3
SOS2	6655	1.04876e-32	1.89695	0.439	0.316	C0		C1orf174	339448	2.22311e-108	3.81794	0.617	0.348	C1		CMTM8	152189	0.000260856	-4.69468	0.706	0.703	C2		KIAA0040	9674	2.35902e-56	-1.5343	0.096	0.344	C3
SLC1A6	6511	2.93013e-38	1.88898	0.253	0.136	C0		COQ9	57017	3.62434e-211	3.81589	0.943	0.718	C1		FANCI	55215	1.93119e-36	-4.69511	0.639	0.39	C2		OBSCN	84033	5.91843e-78	-1.53471	0.086	0.392	C3
PCMTD1	115294	4.90719e-42	1.88481	0.662	0.518	C0		NSL1	25936	9.45217e-259	3.81418	0.84	0.47	C1		SLCO3A1	28232	0.00149947	-4.70938	0.547	0.57	C2		AHDC1	27245	9.02625e-83	-1.53501	0.091	0.41	C3
TM9SF4	9777	3.73934e-11	1.87068	0.624	0.54	C0		EIF4H	7458	6.98147e-223	3.80994	0.976	0.833	C1		AC027601.6		1.08709e-08	-4.71778	0.309	0.237	C2		RNF8	9025	1.6495e-73	-1.53529	0.12	0.423	C3
CAPN1	823	2.30216e-21	1.86325	0.953	0.816	C0		BABAM1	29086	6.49847e-179	3.79956	0.963	0.805	C1		PEX11A	8800	1.40119e-10	-4.74703	0.378	0.46	C2		MARVELD2	153562	2.28859e-80	-1.5362	0.078	0.39	C3
RIN2	54453	4.62384e-17	1.85586	0.536	0.438	C0		TMEM19	55266	7.43656e-69	3.79706	0.582	0.372	C1		WNK1	65125	0.00429637	-4.74961	0.726	0.703	C2		IPPK	64768	3.65906e-47	-1.5366	0.064	0.276	C3
KCNG1	3755	1.88222e-41	1.85467	0.384	0.241	C0		REX1BD	55049	3.99295e-129	3.79368	0.932	0.752	C1		GABPB1-AS1	100129387	2.54388e-07	-4.75132	0.289	0.222	C2		KLHL2	11275	3.34041e-81	-1.53914	0.09	0.404	C3
GLUL	2752	1.14609e-06	1.8538	0.567	0.508	C0		MCMBP	79892	6.08784e-177	3.79317	0.695	0.374	C1		CHPF2	54480	3.9793e-16	-4.76858	0.458	0.551	C2		CPNE2	221184	1.7036e-69	-1.5394	0.092	0.378	C3
C3orf14	57415	1.39743e-21	1.84978	0.544	0.596	C0		EBAG9	9166	6.0046e-158	3.79074	0.907	0.677	C1		FBXW5	54461	0.00525378	-4.76916	0.725	0.699	C2		SECISBP2L	9728	2.86602e-70	-1.53942	0.077	0.364	C3
MVB12A	93343	5.02824e-21	1.84363	0.887	0.745	C0		ZNRF1	84937	7.53321e-77	3.77647	0.872	0.686	C1		GPSM2	29899	1.37045e-26	-4.79132	0.652	0.468	C2		POLR1C	9533	3.01651e-100	-1.53948	0.076	0.432	C3
TMEM184B	25829	4.79939e-06	1.84276	0.8	0.733	C0		ABHD10	55347	1.82125e-227	3.77635	0.776	0.425	C1		RBM42	79171	0.00148076	-4.80543	0.91	0.814	C2		GOT2	2806	2.20326e-156	-1.53949	0.224	0.68	C3
TSC22D4	81628	1.51517e-16	1.83758	0.575	0.469	C0		NSMCE1	197370	6.18698e-136	3.77394	0.867	0.64	C1		DYNC1I2	1781	0.00513736	-4.80727	0.921	0.857	C2		LRRC1	55227	4.31394e-90	-1.54072	0.1	0.438	C3
CDH1	999	1.04134e-37	1.83561	0.915	0.781	C0		SLC25A24	29957	8.26254e-169	3.77076	0.798	0.516	C1		MPZL2	10205	7.99241e-07	-4.80868	0.652	0.665	C2		KAT6A	7994	7.38942e-69	-1.54198	0.069	0.346	C3
AC127526.5		1.48501e-08	1.82728	0.393	0.329	C0		C9orf40	55071	0	3.77075	0.629	0.185	C1		DAP3	7818	0.00368467	-4.8163	0.803	0.764	C2		POT1	25913	1.21876e-97	-1.54228	0.072	0.422	C3
VIPR1	7433	6.50239e-62	1.82728	0.422	0.249	C0		WAC	51322	9.38085e-221	3.77015	0.956	0.741	C1		FAT1	2195	0.000156417	-4.82174	0.667	0.648	C2		GNA13	10672	7.02937e-83	-1.54261	0.069	0.381	C3
MKKS	8195	7.20998e-11	1.82608	0.49	0.532	C0		CDC37	11140	2.31451e-235	3.76941	0.992	0.849	C1		SMIM1	388588	2.45236e-20	-4.8295	0.311	0.435	C2		GATC	283459	3.97214e-90	-1.5436	0.114	0.453	C3
MTHFD1L	25902	6.3053e-05	1.81043	0.512	0.532	C0		PACC1	55248	3.73803e-91	3.76626	0.542	0.299	C1		WLS	79971	6.64866e-10	-4.83462	0.484	0.541	C2		MFSD12	126321	1.51025e-69	-1.54382	0.054	0.331	C3
ETFRF1	144363	2.18444e-27	1.80898	0.577	0.449	C0		ASH1L	55870	1.79535e-106	3.76439	0.839	0.631	C1		ADCK2	90956	0.00575629	-4.83732	0.423	0.446	C2		LYRM7	90624	7.66211e-89	-1.54583	0.075	0.407	C3
LINC-PINT	378805	2.40961e-17	1.80365	0.309	0.224	C0		SMIM1	388588	1.12961e-10	3.76327	0.478	0.394	C1		POLM	27434	0.0015282	-4.84397	0.327	0.363	C2		CTR9	9646	3.11163e-89	-1.54628	0.085	0.419	C3
NMRK1	54981	5.09022e-13	1.80271	0.44	0.354	C0		ZNF652	22834	5.87853e-76	3.76229	0.743	0.551	C1		LRRC41	10489	0.00148046	-4.84647	0.745	0.72	C2		CSGALNACT2	55454	2.38359e-79	-1.54791	0.077	0.383	C3
GBP2	2634	3.00469e-83	1.80248	0.507	0.296	C0		CNOT7	29883	6.44052e-240	3.76124	0.959	0.777	C1		LSM10	84967	0.000216422	-4.85328	0.806	0.728	C2		RBM12B	389677	6.80161e-79	-1.54874	0.069	0.375	C3
UTP25	27042	0.00101836	1.80085	0.292	0.32	C0		NTHL1	4913	1.67045e-184	3.76007	0.861	0.593	C1		CDK5RAP2	55755	1.36968e-13	-4.85613	0.637	0.51	C2		HHLA3	11147	5.19671e-80	-1.54958	0.082	0.393	C3
TRIAP1	51499	3.16656e-11	1.79711	0.727	0.706	C0		EXOSC9	5393	6.11899e-303	3.75265	0.781	0.366	C1		FURIN	5045	1.85416e-07	-4.85683	0.479	0.519	C2		UGT1A1	54658	2.03186e-84	-1.55001	0.076	0.396	C3
PIK3C2A	5286	1.67334e-12	1.79505	0.733	0.636	C0		TLE5	166	7.08937e-170	3.75209	0.983	0.843	C1		NUBP2	10101	0.00396634	-4.86625	0.903	0.798	C2		ING5	84289	9.32145e-97	-1.55073	0.101	0.453	C3
MOSPD3	64598	2.32844e-33	1.78982	0.746	0.597	C0		NINJ1	4814	6.40446e-127	3.73489	0.89	0.671	C1		ARHGAP11A	9824	4.54702e-18	-4.86885	0.343	0.215	C2		SLC35A4	113829	8.13626e-93	-1.55227	0.087	0.43	C3
DPCD	25911	0.00192556	1.7853	0.624	0.56	C0		MSH2	4436	0	3.72874	0.801	0.369	C1		RAD1	5810	0.00300009	-4.87015	0.869	0.764	C2		BOLA1	51027	5.40469e-92	-1.55447	0.091	0.431	C3
TMF1	7110	1.79937e-09	1.78488	0.647	0.555	C0		MRPL32	64983	1.61218e-187	3.72871	0.963	0.769	C1		KXD1	79036	0.00228308	-4.87583	0.785	0.693	C2		ASNSD1	54529	3.25313e-99	-1.55558	0.08	0.435	C3
ARFGAP3	26286	0.000181856	1.78419	0.454	0.405	C0		KIN	22944	1.90059e-92	3.72846	0.727	0.497	C1		UBE2R2	54926	0.000852899	-4.87813	0.846	0.802	C2		TWIST2	117581	8.32215e-85	-1.5562	0.075	0.395	C3
NCBP2AS2	152217	0.000964209	1.78384	0.903	0.789	C0		C19orf48	84798	0	3.72718	0.964	0.674	C1		TRAP1	10131	0.000176498	-4.88412	0.847	0.747	C2		MPV17L2	84769	1.09e-75	-1.55728	0.086	0.384	C3
KDM2A	22992	0.00178376	1.78036	0.735	0.663	C0		USP47	55031	4.05718e-66	3.72656	0.69	0.501	C1		PRPS2	5634	2.46118e-09	-4.89937	0.75	0.634	C2		MIGA1	374986	2.64192e-77	-1.55736	0.103	0.409	C3
LENG8	114823	1.00672e-31	1.77781	0.689	0.555	C0		CREM	1390	3.77192e-144	3.72629	0.707	0.418	C1		INSIG2	51141	2.39982e-14	-4.90457	0.652	0.685	C2		DDI2	84301	7.76392e-90	-1.55852	0.09	0.428	C3
LRP6	4040	4.36683e-22	1.76229	0.557	0.45	C0		PPP4R3B	57223	3.16335e-109	3.72548	0.835	0.623	C1		SDF4	51150	0.0057841	-4.90645	0.822	0.78	C2		DPP8	54878	3.75951e-86	-1.55865	0.094	0.421	C3
ALDH6A1	4329	7.57036e-13	1.76224	0.657	0.568	C0		BRD8	10902	1.37896e-100	3.72382	0.483	0.239	C1		DCLRE1B	64858	3.79121e-08	-4.91422	0.417	0.322	C2		TMEM43	79188	7.32603e-88	-1.55988	0.095	0.425	C3
DUS1L	64118	0.00169255	1.75817	0.876	0.77	C0		ZC3H18	124245	1.76192e-152	3.72206	0.788	0.509	C1		REEP3	221035	0.00541592	-4.91767	0.831	0.798	C2		RETREG3	162427	3.35914e-71	-1.56081	0.083	0.371	C3
TPMT	7172	1.87317e-08	1.75164	0.582	0.505	C0		GAMT	2593	3.79392e-160	3.72148	0.823	0.565	C1		NUP37	79023	9.73283e-74	-4.92243	0.905	0.715	C2		UBA1	7317	1.7295e-98	-1.56142	0.085	0.441	C3
AHCYL2	23382	6.19071e-12	1.74575	0.357	0.286	C0		MASTL	84930	0	3.72064	0.561	0.118	C1		CENPU	79682	1.97954e-44	-4.9246	0.682	0.39	C2		ARHGAP42	143872	1.34202e-54	-1.56194	0.068	0.305	C3
TMEM135	65084	4.01489e-63	1.74318	0.517	0.339	C0		NUDT22	84304	1.01879e-183	3.71935	0.992	0.863	C1		PRMT1	3276	0.000452026	-4.92783	0.99	0.91	C2		RASA2	5922	3.99307e-72	-1.5621	0.073	0.361	C3
GPR108	56927	6.33338e-39	1.74252	0.604	0.458	C0		FANCB	2187	0	3.71285	0.551	0.121	C1		IRF2BPL	64207	0.00155011	-4.93514	0.809	0.729	C2		CEP63	80254	9.17796e-82	-1.56429	0.121	0.443	C3
INHBB	3625	0.00386649	1.74114	0.785	0.75	C0		ARHGEF35	445328	2.07664e-65	3.71147	0.737	0.548	C1		SLC20A1	6574	0.0005273	-4.93611	0.633	0.557	C2		DPH7	92715	1.28518e-106	-1.56477	0.086	0.459	C3
PALMD	54873	3.14038e-46	1.74066	0.306	0.169	C0		CERS2	29956	1.16578e-197	3.71017	0.902	0.657	C1		HIPK2	28996	2.97621e-05	-4.9369	0.631	0.639	C2		CC2D1A	54862	1.84701e-96	-1.56697	0.081	0.43	C3
SMIM10L1	100129361	0.000113015	1.73736	0.571	0.58	C0		ALDH16A1	126133	2.17341e-135	3.70614	0.8	0.519	C1		COMTD1	118881	4.98216e-16	-4.94519	0.801	0.787	C2		FBXO8	26269	6.26388e-87	-1.56798	0.07	0.395	C3
TMC4	147798	2.67716e-80	1.73592	0.692	0.483	C0		TSNAX	7257	1.24982e-138	3.7044	0.97	0.821	C1		NOLC1	9221	4.04676e-06	-4.97163	0.721	0.623	C2		ATG10	83734	6.07652e-82	-1.56899	0.089	0.405	C3
FAM214A	56204	6.27886e-30	1.73044	0.262	0.157	C0		TMEM203	94107	2.43452e-227	3.70112	0.909	0.628	C1		MKLN1	4289	0.00405146	-4.97285	0.578	0.58	C2		BMP2K	55589	2.0385e-51	-1.56933	0.051	0.273	C3
KCTD1	284252	5.74783e-07	1.72727	0.618	0.551	C0		BFSP1	631	4.85102e-32	3.69631	0.381	0.242	C1		EMC2	9694	1.30371e-06	-4.97894	0.844	0.799	C2		TOPORS	10210	2.26078e-100	-1.56956	0.091	0.451	C3
UQCR11	10975	4.23377e-17	1.72196	0.995	0.923	C0		PPIL1	51645	1.76574e-204	3.69413	0.803	0.458	C1		ARHGAP32	9743	2.99877e-06	-4.99331	0.402	0.453	C2		KCNMB2-AS1	104797538	7.94653e-92	-1.56967	0.072	0.411	C3
TRIM33	51592	0.000262932	1.71711	0.885	0.784	C0		WDR76	79968	0	3.69009	0.585	0.102	C1		LUC7L3	51747	3.7254e-10	-5.00026	0.938	0.838	C2		AP2A2	161	2.52135e-97	-1.57026	0.102	0.458	C3
NME3	4832	6.40932e-62	1.7171	0.965	0.826	C0		RIC8A	60626	5.78315e-167	3.68799	0.844	0.563	C1		TMED7	51014	1.41434e-12	-5.00027	0.673	0.701	C2		HTT	3064	2.20142e-77	-1.57048	0.089	0.395	C3
SERF2	10169	4.40739e-52	1.7171	0.998	0.973	C0		TM9SF2	9375	1.41986e-137	3.68695	0.984	0.852	C1		VWA1	64856	2.58681e-09	-5.00234	0.541	0.596	C2		TMX3	54495	1.10583e-93	-1.57116	0.082	0.425	C3
SEC61B	10952	1.86453e-25	1.7171	0.999	0.945	C0		PRKAR1A	5573	2.05761e-97	3.67653	0.896	0.722	C1		BLZF1	8548	0.00639436	-5.00467	0.37	0.402	C2		ZC3H7A	29066	4.78997e-79	-1.57138	0.118	0.43	C3
IRF2BP2	359948	1.75123e-29	1.71705	0.928	0.828	C0		BAG6	7917	1.08202e-125	3.67638	0.913	0.728	C1		CDT1	81620	3.55205e-52	-5.01174	0.622	0.375	C2		ZNF688	146542	8.98374e-104	-1.57309	0.069	0.431	C3
KMT5A	387893	5.40611e-48	1.71679	0.559	0.657	C0		PIN4	5303	3.54436e-114	3.67283	0.803	0.575	C1		PABPC4	8761	4.88969e-12	-5.01431	0.974	0.886	C2		NUP88	4927	1.71583e-88	-1.57377	0.076	0.407	C3
LUCAT1	100505994	2.55567e-28	1.71559	0.29	0.401	C0		HNRNPA0	10949	4.58874e-168	3.67083	0.842	0.585	C1		COMMD4	54939	9.06667e-15	-5.0186	0.9	0.757	C2		TMEM68	137695	4.20162e-104	-1.57396	0.068	0.436	C3
BRK1	55845	1.97296e-16	1.71194	0.986	0.893	C0		STAMBPL1	57559	1.41359e-138	3.6649	0.684	0.386	C1		GOSR2	9570	0.00369568	-5.04538	0.496	0.514	C2		HS6ST2	90161	1.92087e-60	-1.57483	0.097	0.355	C3
EMP2	2013	0.00404631	1.71078	0.983	0.901	C0		ATG5	9474	1.87655e-141	3.66035	0.85	0.614	C1		AREL1	9870	0.000121313	-5.04771	0.337	0.381	C2		IVNS1ABP	10625	1.415e-74	-1.57483	0.07	0.365	C3
CDC42EP3	10602	4.6804e-26	1.71003	0.869	0.751	C0		DVL3	1857	5.6954e-105	3.65067	0.767	0.538	C1		MED19	219541	0.000204031	-5.0515	0.675	0.673	C2		TAF5L	27097	2.51782e-69	-1.57492	0.109	0.398	C3
BICD2	23299	0.000606049	1.70578	0.402	0.433	C0		TMA16	55319	1.57216e-237	3.64991	0.869	0.555	C1		TSKU	25987	1.85659e-05	-5.05838	0.738	0.729	C2		MTERF3	51001	2.33399e-94	-1.57527	0.088	0.435	C3
SUGT1	10910	3.26906e-06	1.7037	0.753	0.725	C0		PARK7	11315	0	3.64797	1	0.934	C1		GABRE	2564	2.68926e-07	-5.07246	0.348	0.407	C2		MAP4K2	5871	2.15806e-94	-1.57572	0.099	0.445	C3
CXCL16	58191	3.73043e-08	1.70337	0.469	0.508	C0		EXOSC5	56915	4.48972e-182	3.6477	0.833	0.534	C1		PSMG1	8624	0.00310056	-5.07649	0.714	0.616	C2		TRAPPC6B	122553	1.1339e-92	-1.57591	0.091	0.435	C3
TSKU	25987	1.48697e-13	1.70239	0.784	0.685	C0		HIPK3	10114	1.15737e-129	3.64137	0.894	0.7	C1		EMC8	10328	0.00444081	-5.0826	0.839	0.759	C2		SLC25A29	123096	5.13131e-96	-1.5761	0.068	0.415	C3
LPP	4026	1.83416e-19	1.702	0.844	0.745	C0		DPM2	8818	2.8735e-225	3.63492	0.93	0.688	C1		BRCA1	672	3.60972e-35	-5.08768	0.609	0.355	C2		B4GALT4	8702	8.79188e-78	-1.57636	0.067	0.367	C3
NXT2	55916	0.000379598	1.69794	0.658	0.59	C0		MCCC2	64087	1.22859e-84	3.63063	0.839	0.659	C1		MAZ	4150	3.45861e-05	-5.09681	0.906	0.794	C2		XAB2	56949	2.19605e-106	-1.57813	0.067	0.435	C3
ITGB6	3694	6.34689e-28	1.69716	0.332	0.225	C0		TPGS2	25941	7.18932e-205	3.62856	0.845	0.539	C1		LTBP1	4052	6.25451e-06	-5.09758	0.285	0.34	C2		RUFY2	55680	7.18563e-86	-1.57901	0.084	0.411	C3
ARFGEF1	10565	7.20765e-08	1.69658	0.432	0.372	C0		USB1	79650	3.34575e-124	3.6281	0.896	0.705	C1		MTA3	57504	6.29081e-15	-5.09876	0.811	0.804	C2		ARID2	196528	1.09475e-74	-1.58029	0.123	0.426	C3
RABGAP1	23637	2.8394e-11	1.68909	0.631	0.555	C0		MRPS18A	55168	6.15336e-148	3.62704	0.896	0.68	C1		STX7	8417	0.00840465	-5.109	0.614	0.615	C2		DVL1	1855	1.03627e-80	-1.58086	0.095	0.409	C3
ARL3	403	2.90725e-09	1.67841	0.753	0.718	C0		TRAM1	23471	1.28025e-115	3.6221	0.909	0.722	C1		LIG1	3978	1.80784e-20	-5.11211	0.634	0.445	C2		USP24	23358	6.87562e-91	-1.58125	0.11	0.449	C3
ZNF503	84858	3.22082e-05	1.67742	0.328	0.287	C0		IFT27	11020	2.23649e-122	3.61873	0.883	0.669	C1		SMIM29	221491	2.51126e-13	-5.11975	0.521	0.601	C2		UBR2	23304	1.47137e-95	-1.58141	0.097	0.45	C3
AKAP1	8165	2.73732e-17	1.67742	0.631	0.638	C0		FAM104A	84923	5.34255e-187	3.61316	0.875	0.602	C1		MYO10	4651	0.00804441	-5.12977	0.495	0.519	C2		ANAPC1	64682	8.96032e-92	-1.58409	0.084	0.425	C3
UQCRC2	7385	5.101e-08	1.67615	0.985	0.876	C0		HSDL2	84263	4.12439e-199	3.61301	0.914	0.687	C1		DHPS	1725	0.00230627	-5.14332	0.851	0.802	C2		PPIP5K2	23262	5.35335e-99	-1.58493	0.095	0.453	C3
SEC61A1	29927	2.49871e-26	1.673	0.824	0.702	C0		TFDP2	7029	4.11416e-90	3.61289	0.77	0.542	C1		SDSL	113675	2.58644e-06	-5.15725	0.279	0.339	C2		RIOK2	55781	4.65619e-106	-1.58507	0.066	0.433	C3
SLC33A1	9197	2.86485e-34	1.6659	0.532	0.4	C0		FIGNL1	63979	0	3.61195	0.722	0.249	C1		DNAJA2	10294	7.43133e-06	-5.15864	0.988	0.913	C2		DMAC2	55101	3.33366e-105	-1.58525	0.077	0.447	C3
SEZ6L2	26470	1.4663e-21	1.66042	0.532	0.425	C0		PMM1	5372	0	3.61153	0.914	0.547	C1		SIGIRR	59307	0.000538203	-5.16254	0.58	0.6	C2		STYX	6815	2.42978e-93	-1.58613	0.105	0.45	C3
TOB2	10766	0.00230744	1.65907	0.456	0.414	C0		HAUS8	93323	0	3.60919	0.764	0.201	C1		MTFR2	113115	0.00014475	-5.16429	0.317	0.242	C2		EFCAB2	84288	1.60057e-89	-1.58628	0.098	0.434	C3
SYNE4	163183	7.60775e-38	1.65394	0.797	0.655	C0		CEP57	9702	0	3.60891	0.839	0.416	C1		COPG1	22820	6.28615e-16	-5.16933	0.734	0.759	C2		ATP13A1	57130	1.0913e-106	-1.58808	0.08	0.455	C3
TIAM1	7074	0.000225559	1.65219	0.45	0.399	C0		TXNDC5	81567	2.82671e-210	3.60479	0.9	0.649	C1		BMP7	655	5.60725e-05	-5.17219	0.302	0.351	C2		R3HCC1	203069	1.62136e-94	-1.58865	0.082	0.426	C3
YTHDC1	91746	0.00216141	1.65189	0.528	0.539	C0		ANKRD39	51239	8.56633e-182	3.6031	0.84	0.566	C1		RFNG	5986	5.00177e-06	-5.17875	0.594	0.61	C2		CEP57L1	285753	1.28674e-68	-1.58911	0.08	0.36	C3
HAS3	3038	9.03928e-09	1.64701	0.388	0.323	C0		GMPR2	51292	3.14474e-116	3.60304	0.824	0.59	C1		MRPS18C	51023	3.11028e-08	-5.18204	0.953	0.849	C2		INTS8	55656	1.86601e-100	-1.58918	0.1	0.46	C3
ASXL1	171023	4.70184e-19	1.64562	0.506	0.567	C0		FIBCD1	84929	6.16606e-76	3.60196	0.682	0.462	C1		IGFBP4	3487	2.95686e-09	-5.18354	0.417	0.324	C2		THAP1	55145	1.3843e-70	-1.5899	0.061	0.341	C3
TC2N	123036	1.43716e-51	1.6454	0.622	0.459	C0		BCL7B	9275	4.65539e-280	3.59819	0.917	0.65	C1		TACC3	10460	8.45323e-47	-5.18731	0.572	0.321	C2		DHX16	8449	2.81442e-86	-1.58998	0.113	0.443	C3
TMEM248	55069	5.22834e-08	1.64231	0.934	0.815	C0		MOSPD1	56180	1.65717e-79	3.59527	0.796	0.605	C1		FAM91A1	157769	0.00794424	-5.1936	0.752	0.686	C2		EAF1	85403	2.4514e-71	-1.59007	0.078	0.367	C3
FBXW7	55294	3.09529e-21	1.64103	0.502	0.393	C0		RRAS	6237	4.10912e-50	3.59397	0.504	0.321	C1		XRCC2	7516	8.86029e-34	-5.19892	0.414	0.24	C2		PSPC1	55269	2.9677e-101	-1.59057	0.088	0.453	C3
ACOX1	51	3.99716e-33	1.62899	0.565	0.437	C0		HAT1	8520	0	3.58906	0.998	0.846	C1		MGAT4A	11320	0.00596393	-5.20469	0.582	0.574	C2		NUTM2B-AS1	101060691	1.09448e-110	-1.59123	0.088	0.471	C3
TRIM38	10475	1.80974e-29	1.62796	0.589	0.456	C0		CDKN1B	1027	8.28044e-164	3.58433	0.697	0.389	C1		EPHB4	2050	2.94854e-07	-5.21169	0.592	0.643	C2		NKRF	55922	5.52184e-86	-1.59261	0.091	0.417	C3
PDAP1	11333	5.80637e-13	1.62588	0.967	0.874	C0		GPN3	51184	0	3.58143	0.922	0.579	C1		OGA	10724	1.17052e-05	-5.21571	0.754	0.67	C2		TMEM128	85013	7.32761e-109	-1.59306	0.09	0.468	C3
ERBB3	2065	6.44313e-37	1.62512	0.793	0.655	C0		COPS8	10920	8.15452e-249	3.58095	0.957	0.725	C1		PGM1	5236	1.2522e-08	-5.21856	0.79	0.76	C2		SLC9A1	6548	7.41085e-84	-1.5942	0.075	0.392	C3
PLEC	5339	6.24046e-07	1.62452	0.665	0.591	C0		CDC40	51362	2.07149e-122	3.57531	0.754	0.512	C1		MICALL2	79778	2.25237e-05	-5.22997	0.312	0.363	C2		SIRPA	140885	1.13231e-91	-1.59525	0.095	0.437	C3
ARRB1	408	1.86641e-20	1.61017	0.512	0.406	C0		ISYNA1	51477	5.49019e-157	3.57337	0.882	0.632	C1		RFC3	5983	1.11283e-15	-5.2399	0.558	0.399	C2		ZZEF1	23140	3.11679e-100	-1.59583	0.091	0.454	C3
THUMPD3-AS1	440944	0.000382086	1.61012	0.592	0.594	C0		TMX2	51075	5.5274e-217	3.57124	0.969	0.809	C1		PCSK9	255738	0.000382132	-5.24988	0.234	0.278	C2		DCAF12	25853	3.22386e-86	-1.59793	0.112	0.439	C3
RIDA	10247	7.47888e-15	1.6101	0.707	0.598	C0		ATP6V0E2	155066	1.85328e-151	3.56905	0.785	0.506	C1		ZKSCAN1	7586	2.70779e-06	-5.25473	0.706	0.71	C2		DUS4L	11062	2.09228e-75	-1.59845	0.104	0.405	C3
CMSS1	84319	9.08709e-84	1.60974	0.81	0.812	C0		LRPAP1	4043	1.51908e-162	3.56849	0.982	0.838	C1		CANT1	124583	1.06632e-08	-5.2715	0.641	0.667	C2		KDM3A	55818	3.67547e-55	-1.60104	0.054	0.289	C3
SOCS6	9306	1.1384e-08	1.60802	0.445	0.385	C0		KNL1	57082	0	3.56841	0.516	0.1	C1		MBNL1	4154	1.27707e-07	-5.27163	0.898	0.808	C2		PICK1	9463	1.3905e-111	-1.602	0.064	0.443	C3
ZKSCAN1	7586	6.69991e-60	1.60649	0.797	0.637	C0		MIEF1	54471	1.45094e-95	3.56741	0.81	0.615	C1		NFKBIZ	64332	1.23258e-05	-5.28496	0.202	0.255	C2		ATF2	1386	7.37378e-94	-1.60251	0.09	0.435	C3
SDCCAG8	10806	2.07581e-07	1.60311	0.536	0.476	C0		CCDC25	55246	5.43132e-155	3.56271	0.887	0.664	C1		NDUFAF4	29078	1.55555e-10	-5.28519	0.854	0.745	C2		FAM98B	283742	1.72839e-90	-1.60393	0.105	0.442	C3
DIP2B	57609	4.73382e-10	1.6031	0.54	0.453	C0		KLHL36	79786	1.6679e-57	3.56215	0.733	0.549	C1		PTK6	5753	4.83679e-21	-5.28587	0.286	0.414	C2		RPIA	22934	2.57975e-92	-1.60404	0.098	0.44	C3
CD40	958	9.27396e-30	1.60172	0.556	0.427	C0		YEATS4	8089	1.26248e-246	3.56022	0.748	0.361	C1		OCLN	100506658	9.89565e-06	-5.29238	0.666	0.57	C2		CTNNA1	1495	4.50153e-94	-1.6042	0.086	0.431	C3
GPR107	57720	0.000129357	1.59717	0.542	0.494	C0		RMI2	116028	1.08757e-253	3.55816	0.531	0.15	C1		FIBCD1	84929	6.7352e-05	-5.30581	0.499	0.519	C2		TERF2	7014	3.13359e-74	-1.60443	0.091	0.39	C3
F11R	50848	0.00056568	1.59583	0.757	0.683	C0		TENT4B	64282	6.2565e-158	3.55343	0.812	0.545	C1		LMBRD1	55788	6.0585e-22	-5.31453	0.639	0.696	C2		TUSC1	286319	4.53177e-78	-1.60536	0.087	0.397	C3
EPS8	2059	1.97208e-11	1.59536	0.521	0.569	C0		EML4	27436	8.80327e-116	3.55311	0.851	0.618	C1		PEX16	9409	4.44195e-09	-5.32052	0.727	0.725	C2		PRKAG2-AS1	100505483	1.8413e-78	-1.6054	0.071	0.376	C3
TLE2	7089	8.0144e-25	1.59516	0.487	0.374	C0		PRPF19	27339	4.64607e-235	3.5528	0.867	0.557	C1		CALM3	808	1.78828e-13	-5.32717	0.97	0.867	C2		REV1	51455	2.78103e-88	-1.606	0.095	0.426	C3
MPV17	4358	1.29295e-05	1.59296	0.674	0.599	C0		TM9SF1	10548	1.81451e-176	3.54717	0.938	0.742	C1		ERBB3	2065	0.000239889	-5.33672	0.727	0.715	C2		ASXL2	55252	1.3038e-93	-1.60674	0.099	0.444	C3
CREG1	8804	6.96099e-12	1.5905	0.642	0.554	C0		FARSA	2193	7.49644e-214	3.54581	0.863	0.556	C1		DHRS1	115817	0.00185496	-5.34892	0.608	0.614	C2		MDFI	4188	2.88627e-85	-1.60709	0.078	0.4	C3
MAST4	375449	2.74568e-41	1.58754	0.634	0.481	C0		SP1	6667	3.74663e-154	3.54579	0.798	0.519	C1		CDC42BPA	8476	0.00294616	-5.36228	0.635	0.637	C2		TNFRSF10B	8795	5.4519e-88	-1.6071	0.089	0.42	C3
ARFGEF3	57221	3.40675e-05	1.57923	0.55	0.497	C0		CCM2	83605	2.45994e-219	3.54439	0.751	0.394	C1		FUS	2521	7.86822e-12	-5.36453	0.978	0.898	C2		IGF1R	3480	5.28993e-70	-1.60753	0.103	0.392	C3
JMY	133746	5.45311e-35	1.57478	0.381	0.253	C0		DBNL	28988	1.73483e-121	3.54269	0.911	0.713	C1		TYMP	1890	1.14457e-20	-5.37009	0.577	0.659	C2		CSNK1G3	1456	1.29899e-93	-1.60889	0.111	0.461	C3
GPCPD1	56261	9.49479e-36	1.57406	0.421	0.293	C0		RBIS	401466	1.14497e-254	3.53653	0.997	0.915	C1		FAM111B	374393	0.000417011	-5.37174	0.278	0.217	C2		CLN5	1203	5.53211e-110	-1.60944	0.076	0.454	C3
RNF13	11342	1.40424e-17	1.57082	0.868	0.747	C0		DPYSL2	1808	3.37955e-158	3.53516	0.875	0.638	C1		RNF141	50862	0.00546066	-5.37652	0.801	0.768	C2		ELMOD2	255520	9.96016e-110	-1.60956	0.088	0.468	C3
GALNT6	11226	5.26233e-21	1.56554	0.846	0.719	C0		PRRG2	5639	7.66597e-21	3.53491	0.457	0.334	C1		ASPM	259266	9.97572e-132	-5.38824	0.612	0.265	C2		PRAG1	157285	4.22135e-53	-1.61396	0.081	0.317	C3
TULP4	56995	0.000260305	1.55524	0.473	0.421	C0		ZFR	51663	6.62721e-127	3.53354	0.886	0.688	C1		TFAP2A	7020	0.000225591	-5.40134	0.587	0.611	C2		SART3	9733	4.9366e-109	-1.61446	0.087	0.467	C3
MLXIP	22877	1.10415e-26	1.55085	0.707	0.599	C0		DDX18	8886	5.75814e-268	3.53167	0.989	0.847	C1		CDC5L	988	0.000349085	-5.40342	0.832	0.729	C2		NRCAM	4897	4.99999e-67	-1.61461	0.084	0.361	C3
IGSF8	93185	4.91811e-32	1.54631	0.589	0.448	C0		ILK	3611	9.06395e-103	3.5296	0.748	0.517	C1		EMC9	51016	4.20465e-15	-5.40654	0.858	0.724	C2		RINT1	60561	6.24301e-102	-1.61568	0.094	0.457	C3
PPM1K	152926	2.74111e-17	1.54232	0.292	0.208	C0		VOPP1	81552	0	3.52708	0.992	0.796	C1		TINCR	257000	4.83078e-13	-5.40956	0.534	0.59	C2		ZNF672	79894	6.18444e-90	-1.61825	0.097	0.431	C3
B3GNT5	84002	0.000649961	1.54131	0.587	0.544	C0		RAD23A	5886	0	3.52303	1	0.919	C1		DNTTIP2	30836	4.40651e-05	-5.41432	0.846	0.772	C2		B3GALT6	126792	9.26922e-90	-1.61833	0.078	0.411	C3
PEX7	5191	1.46938e-07	1.54051	0.49	0.426	C0		PBRM1	55193	3.94234e-124	3.51944	0.703	0.427	C1		FBXO2	26232	1.21976e-10	-5.42487	0.218	0.302	C2		METTL8	79828	7.87773e-73	-1.61957	0.088	0.381	C3
SELENOK	58515	3.62003e-05	1.53939	0.858	0.795	C0		PDIA4	9601	2.33165e-199	3.5171	0.996	0.895	C1		ELAVL1	1994	6.7532e-06	-5.43844	0.918	0.821	C2		POFUT1	23509	3.36661e-76	-1.6197	0.101	0.403	C3
EPHB4	2050	1.49436e-26	1.53854	0.703	0.578	C0		NT5C2	22978	1.94014e-76	3.51364	0.743	0.54	C1		TMEM120A	83862	0.0043705	-5.44676	0.708	0.692	C2		LRRC14	9684	2.65163e-102	-1.62003	0.074	0.437	C3
PUS10	150962	1.38568e-28	1.53811	0.413	0.296	C0		VAPB	9217	8.19523e-198	3.51107	0.902	0.66	C1		MOB1A	55233	2.76687e-06	-5.44827	0.966	0.878	C2		PDP1	54704	8.02758e-55	-1.62076	0.086	0.328	C3
SGMS1	259230	1.69206e-24	1.5371	0.573	0.458	C0		RAD23B	5887	6.51756e-170	3.50913	0.972	0.836	C1		MND1	84057	3.63498e-17	-5.44916	0.487	0.306	C2		EVPL	2125	2.55848e-68	-1.62318	0.062	0.336	C3
YKT6	10652	0.000688782	1.5367	0.801	0.736	C0		PIMREG	54478	0	3.50151	0.587	0.143	C1		ABCD3	5825	4.0234e-05	-5.45009	0.746	0.735	C2		CPTP	80772	2.61139e-107	-1.62476	0.07	0.443	C3
DDX27	55661	0.000232415	1.53409	0.945	0.825	C0		SUCLG1	8802	0	3.50096	0.999	0.897	C1		KAT6B	23522	0.00103497	-5.45558	0.494	0.523	C2		TLE3	7090	9.32079e-79	-1.62555	0.095	0.408	C3
SPRED1	161742	1.15853e-14	1.52973	0.49	0.403	C0		CAT	847	5.16165e-96	3.49935	0.952	0.798	C1		CMIP	80790	2.45146e-12	-5.45765	0.571	0.622	C2		ZNF33A	7581	3.76616e-98	-1.62587	0.097	0.454	C3
FBXL5	26234	4.77929e-14	1.52946	0.367	0.287	C0		ZNF326	284695	1.82407e-231	3.49656	0.822	0.458	C1		RUVBL2	10856	1.28943e-10	-5.45799	0.818	0.69	C2		SHB	6461	1.79409e-85	-1.62593	0.084	0.409	C3
RFC3	5983	1.03256e-247	1.52927	0.239	0.581	C0		SDF2	6388	6.60222e-137	3.4964	0.894	0.679	C1		MAGED2	10916	8.449e-13	-5.46135	0.521	0.594	C2		ATF1	466	4.57315e-90	-1.62613	0.139	0.485	C3
SNX21	90203	6.22085e-29	1.52694	0.277	0.171	C0		ECSIT	51295	3.82586e-136	3.49619	0.813	0.557	C1		MIS18BP1	55320	1.6009e-22	-5.46424	0.64	0.451	C2		GOLPH3L	55204	1.43728e-94	-1.6276	0.097	0.445	C3
PSMD3	5709	1.37105e-05	1.52174	0.87	0.771	C0		BCCIP	56647	4.17052e-150	3.49372	0.817	0.559	C1		PBK	55872	7.36561e-61	-5.47068	0.618	0.32	C2		GPALPP1	55425	2.50876e-97	-1.62777	0.095	0.448	C3
C8orf82	414919	1.89449e-07	1.52134	0.822	0.724	C0		ITFG1	81533	1.96805e-88	3.49183	0.924	0.752	C1		SMC2	10592	6.88934e-59	-5.47339	0.847	0.575	C2		MPHOSPH9	10198	3.39023e-58	-1.62894	0.065	0.311	C3
DAG1	1605	1.54719e-12	1.51793	0.794	0.705	C0		ARF6	382	2.28501e-288	3.49057	0.995	0.891	C1		RSPH1	89765	3.51866e-07	-5.52047	0.226	0.29	C2		DENND2D	79961	7.37107e-91	-1.63022	0.081	0.419	C3
TECR	9524	3.27889e-05	1.50721	0.996	0.889	C0		PURB	5814	3.12177e-97	3.48633	0.805	0.593	C1		RAB11B	9230	0.000373054	-5.52093	0.817	0.783	C2		CRKL	1399	1.34504e-81	-1.63068	0.069	0.38	C3
BAIAP2L1	55971	3.44569e-05	1.50545	0.713	0.647	C0		XPO6	23214	2.96319e-149	3.4857	0.751	0.465	C1		ATL2	64225	2.60451e-08	-5.52211	0.679	0.695	C2		SLC25A32	81034	1.45166e-102	-1.63082	0.095	0.458	C3
NBDY	550643	6.47517e-19	1.50313	0.541	0.442	C0		LZIC	84328	2.08178e-136	3.48558	0.837	0.598	C1		C9orf78	51759	0.00547175	-5.53508	0.779	0.712	C2		RECQL4	9401	3.21012e-71	-1.63095	0.066	0.349	C3
ASAH1	427	2.16554e-45	1.50144	0.968	0.854	C0		LRRC42	115353	1.62233e-144	3.48462	0.877	0.644	C1		CCDC59	29080	0.00082456	-5.54	0.768	0.681	C2		TOR2A	27433	6.80431e-119	-1.6319	0.059	0.454	C3
BIN1	274	2.26975e-20	1.49893	0.439	0.518	C0		TIAL1	7073	1.99031e-203	3.48227	0.928	0.687	C1		HNRNPD	3184	1.4735e-14	-5.54056	0.981	0.883	C2		TCTN3	26123	6.10748e-127	-1.63218	0.074	0.488	C3
SLC41A1	254428	1.34044e-07	1.49629	0.386	0.326	C0		PAXIP1	22976	1.53208e-206	3.48204	0.735	0.38	C1		TMEM159	57146	1.11654e-07	-5.55278	0.499	0.549	C2		RNF121	55298	3.64113e-112	-1.63249	0.062	0.444	C3
GFPT2	9945	6.34096e-05	1.49246	0.267	0.229	C0		PCM1	5108	3.11425e-157	3.475	0.775	0.496	C1		NIP7	51388	1.54615e-14	-5.55528	0.769	0.64	C2		HEATR5A	25938	7.16367e-93	-1.6326	0.095	0.438	C3
FBXO3	26273	4.94379e-29	1.48949	0.728	0.587	C0		LRRC41	10489	3.4282e-18	3.47467	0.778	0.706	C1		CAPRIN2	65981	9.70242e-13	-5.55729	0.323	0.411	C2		PIGL	9487	3.72887e-63	-1.63566	0.041	0.295	C3
SNRNP48	154007	1.35347e-24	1.48806	0.566	0.623	C0		B4GALT5	9334	3.67586e-101	3.47006	0.85	0.646	C1		STXBP2	6813	4.09393e-07	-5.56542	0.757	0.746	C2		CDK5RAP3	80279	3.8018e-108	-1.63631	0.063	0.436	C3
PPP1R18	170954	4.92697e-30	1.48273	0.324	0.439	C0		DCK	1633	0	3.46895	0.642	0.179	C1		TAF7	6879	1.11486e-06	-5.58566	0.899	0.818	C2		PDPR	55066	9.24155e-88	-1.63675	0.1	0.432	C3
DMAC2L	27109	1.284e-08	1.48125	0.753	0.656	C0		SPDL1	54908	0	3.4678	0.636	0.186	C1		IMMT	10989	0.00650152	-5.59629	0.861	0.775	C2		PTPN14	5784	6.08944e-71	-1.63711	0.118	0.414	C3
CEBPZOS	100505876	2.08792e-06	1.47912	0.802	0.698	C0		CUL4A	8451	3.29409e-140	3.46722	0.853	0.607	C1		NSDHL	50814	1.02463e-09	-5.59683	0.817	0.782	C2		CLCN7	1186	1.46817e-81	-1.63756	0.085	0.4	C3
CAPN8	388743	9.79361e-92	1.47525	0.807	0.639	C0		PSMG1	8624	0	3.46426	0.898	0.547	C1		HDAC1	3065	3.95446e-08	-5.60599	0.944	0.855	C2		CGRRF1	10668	3.87034e-81	-1.64086	0.083	0.397	C3
EDEM2	55741	7.53118e-16	1.46981	0.651	0.546	C0		CBY1	25776	1.24773e-173	3.45932	0.901	0.667	C1		PPARG	5468	0.000379293	-5.61959	0.546	0.563	C2		ODR4	54953	4.63325e-94	-1.64214	0.092	0.438	C3
CERCAM	51148	6.2954e-59	1.46769	0.712	0.546	C0		RCE1	9986	1.06299e-194	3.45816	0.887	0.634	C1		AAK1	22848	6.29982e-05	-5.63197	0.596	0.61	C2		SRFBP1	153443	2.52041e-116	-1.64223	0.087	0.479	C3
SEC14L2	23541	9.04637e-41	1.4643	0.287	0.164	C0		ZCRB1	85437	1.74214e-270	3.45718	0.996	0.883	C1		EHF	26298	1.2435e-06	-5.63639	0.633	0.65	C2		NFKBIL1	4795	3.49455e-92	-1.64301	0.074	0.414	C3
DRAP1	10589	0.00624929	1.46047	0.994	0.892	C0		RBM47	54502	1.70572e-136	3.45613	0.981	0.865	C1		RAB5B	5869	1.75385e-06	-5.63998	0.603	0.631	C2		GTF3C3	9330	2.30445e-93	-1.6433	0.121	0.47	C3
FNDC3A	22862	3.90643e-15	1.46009	0.411	0.324	C0		ARV1	64801	2.46231e-179	3.45356	0.865	0.584	C1		RASSF3	283349	6.68584e-12	-5.64871	0.704	0.588	C2		VPS26B	112936	5.41608e-82	-1.64376	0.09	0.408	C3
RNF43	54894	1.00636e-64	1.45882	0.472	0.289	C0		RUSC1	23623	1.04436e-200	3.44608	0.756	0.415	C1		MTIF2	4528	6.05614e-08	-5.65012	0.782	0.69	C2		OCRL	4952	1.50532e-82	-1.64395	0.104	0.424	C3
KDM3A	55818	2.38799e-15	1.45531	0.301	0.223	C0		RFWD3	55159	4.56446e-255	3.44063	0.686	0.284	C1		MRPL39	54148	0.0027539	-5.66142	0.468	0.419	C2		PGAM5	192111	4.54131e-86	-1.64469	0.08	0.406	C3
PFDN1	5201	6.29333e-07	1.44441	0.805	0.75	C0		MAP3K8	1326	3.71704e-51	3.43687	0.605	0.419	C1		C8orf33	65265	9.80487e-05	-5.66186	0.75	0.683	C2		ELOA	6924	3.65158e-81	-1.64507	0.113	0.431	C3
SNX2	6643	4.21862e-05	1.43995	0.702	0.634	C0		CHPF2	54480	1.34347e-30	3.43533	0.642	0.5	C1		NQO2	4835	0.00309295	-5.66257	0.71	0.635	C2		GRB10	2887	5.47799e-62	-1.64515	0.073	0.333	C3
RAPGEF5	9771	7.17793e-22	1.43828	0.469	0.368	C0		AIDA	64853	3.52684e-180	3.43327	0.851	0.577	C1		NPLOC4	55666	2.05811e-05	-5.66372	0.741	0.725	C2		KCTD13	253980	1.14971e-94	-1.64628	0.089	0.436	C3
UROS	7390	8.36976e-11	1.43569	0.69	0.595	C0		ARL2BP	23568	4.93767e-168	3.43164	0.926	0.741	C1		TLCD1	116238	5.78356e-07	-5.66466	0.591	0.615	C2		GTF3C5	9328	5.49341e-90	-1.64686	0.114	0.455	C3
TGIF1	7050	1.36368e-12	1.43353	0.838	0.744	C0		PKMYT1	9088	0	3.42958	0.691	0.135	C1		SMAP1	60682	0.000696236	-5.67515	0.691	0.684	C2		GATAD2B	57459	9.28109e-83	-1.64694	0.089	0.411	C3
DHX32	55760	2.62133e-06	1.43193	0.494	0.438	C0		THUMPD1	55623	1.01887e-135	3.42707	0.838	0.605	C1		ABHD14B	84836	4.75266e-05	-5.67863	0.666	0.667	C2		SH3PXD2A-AS1	100505839	1.67184e-65	-1.64989	0.067	0.336	C3
NUDT9	53343	0.00618687	1.42202	0.47	0.433	C0		CSTF1	1477	2.81446e-198	3.42543	0.77	0.454	C1		TCOF1	6949	7.19469e-26	-5.6787	0.662	0.461	C2		TRNT1	51095	3.69814e-99	-1.65061	0.1	0.458	C3
METTL27	155368	8.71692e-14	1.41961	0.299	0.223	C0		SETD3	84193	1.71633e-90	3.42163	0.649	0.412	C1		FKBP3	2287	0.00255855	-5.6791	0.902	0.8	C2		LPCAT4	254531	1.06486e-59	-1.65109	0.07	0.322	C3
RNF149	284996	1.15272e-27	1.41808	0.741	0.627	C0		PARL	55486	2.05627e-180	3.42059	0.949	0.729	C1		RICTOR	253260	5.82012e-09	-5.69054	0.704	0.722	C2		MUC20	200958	2.10553e-76	-1.65192	0.062	0.359	C3
SEC23B	10483	2.49761e-06	1.41762	0.748	0.655	C0		UTP23	84294	6.20277e-140	3.41239	0.795	0.527	C1		MPV17	4358	0.000300168	-5.69797	0.626	0.635	C2		BRPF3	27154	1.25296e-86	-1.65195	0.099	0.43	C3
FLYWCH2	114984	1.45269e-15	1.41594	0.826	0.683	C0		TAF11	6882	8.81244e-144	3.40954	0.768	0.507	C1		HEXA	3073	0.00783055	-5.70226	0.67	0.659	C2		PTPN4	5775	7.06535e-117	-1.65235	0.08	0.474	C3
ZNF638	27332	5.65756e-09	1.41488	0.644	0.557	C0		CHMP1A	5119	5.04481e-162	3.40679	0.901	0.665	C1		COL4A5	1287	5.07194e-18	-5.70835	0.622	0.675	C2		CCNK	8812	6.65384e-86	-1.65362	0.136	0.47	C3
USE1	55850	1.25813e-09	1.41068	0.604	0.51	C0		PXDN	7837	2.02723e-113	3.40334	0.809	0.567	C1		CRELD2	79174	0.00023578	-5.70893	0.652	0.657	C2		RNPEPL1	57140	7.51319e-111	-1.65418	0.08	0.462	C3
PUS1	80324	1.40271e-18	1.4083	0.28	0.366	C0		MTCH2	23788	0	3.40255	1	0.912	C1		ZNRF1	84937	1.96725e-09	-5.7171	0.722	0.733	C2		GALK1	2584	3.56713e-105	-1.65438	0.08	0.447	C3
CMIP	80790	2.91068e-05	1.40684	0.653	0.581	C0		NUMA1	4926	8.61527e-229	3.40165	0.873	0.576	C1		PXMP2	5827	1.60046e-13	-5.72509	0.676	0.53	C2		FAM98C	147965	5.45148e-108	-1.65554	0.072	0.448	C3
EDEM1	9695	1.86483e-17	1.40511	0.446	0.356	C0		ANAPC10	10393	7.65312e-185	3.4013	0.852	0.57	C1		RALGAPA2	57186	3.00312e-10	-5.73697	0.454	0.527	C2		LIN37	55957	1.88954e-100	-1.65602	0.052	0.405	C3
CDK17	5128	3.43264e-14	1.40378	0.366	0.284	C0		CPSF6	11052	2.84039e-207	3.40086	0.908	0.648	C1		TIPARP	25976	1.04637e-05	-5.74264	0.202	0.255	C2		MRPS27	23107	4.57208e-106	-1.65721	0.103	0.476	C3
UTP6	55813	0.00397538	1.40376	0.719	0.673	C0		SMAD1	4086	7.61114e-39	3.39147	0.666	0.519	C1		SUCLG1	8802	0.00287656	-5.74351	0.985	0.909	C2		CPT1A	1374	3.22391e-90	-1.65741	0.154	0.497	C3
SHARPIN	81858	8.53765e-18	1.40166	0.876	0.736	C0		NUP93	9688	1.27283e-215	3.38811	0.856	0.542	C1		KLHL36	79786	3.43859e-05	-5.76472	0.569	0.6	C2		EEF1AKMT1	221143	6.4726e-98	-1.65745	0.077	0.431	C3
C12orf49	79794	7.38527e-08	1.39962	0.578	0.497	C0		HMG20B	10362	1.69885e-148	3.3877	0.851	0.602	C1		EIF4E	1977	0.000535017	-5.77241	0.907	0.812	C2		OTULIN	90268	1.29427e-98	-1.65769	0.111	0.469	C3
WDR45	11152	3.04711e-27	1.39953	0.429	0.309	C0		FBXO4	26272	1.41003e-205	3.38408	0.662	0.302	C1		RARS	5917	0.000310092	-5.77959	0.934	0.866	C2		FANCL	55120	2.62882e-80	-1.65844	0.044	0.345	C3
TMEM141	85014	1.37427e-23	1.39662	0.984	0.881	C0		NAA50	80218	0	3.38357	0.991	0.828	C1		GALNT2	2590	0.0046202	-5.80518	0.634	0.642	C2		VGLL4	9686	5.89393e-89	-1.65905	0.083	0.416	C3
SLC17A5	26503	1.41709e-33	1.39399	0.468	0.339	C0		MRPL15	29088	1.0649e-193	3.38305	0.947	0.727	C1		MAPKAPK3	7867	8.15291e-06	-5.81585	0.494	0.521	C2		POLDIP3	84271	3.13553e-98	-1.65976	0.088	0.444	C3
PNPT1	87178	1.93591e-17	1.39316	0.51	0.575	C0		NDUFA2	4695	3.2087e-241	3.38223	0.997	0.906	C1		LRR1	122769	5.24216e-51	-5.83828	0.83	0.551	C2		DHX33	56919	4.81743e-90	-1.66023	0.084	0.421	C3
SUMF2	25870	3.37352e-14	1.38633	0.985	0.874	C0		NSUN2	54888	6.81588e-145	3.38157	0.897	0.693	C1		SEPHS1	22929	4.97817e-23	-5.8471	0.914	0.76	C2		RAF1	5894	6.10368e-92	-1.66171	0.119	0.461	C3
SLC35F3	148641	1.10387e-23	1.38534	0.401	0.295	C0		IST1	9798	5.44385e-126	3.37569	0.822	0.576	C1		GGH	8836	2.09734e-05	-5.84937	0.862	0.75	C2		NFAT5	10725	9.82833e-133	-1.66247	0.079	0.508	C3
LDOC1	23641	6.31847e-16	1.38532	0.366	0.281	C0		MDP1	145553	3.46741e-132	3.37525	0.798	0.554	C1		SHROOM3	57619	0.00703356	-5.85029	0.569	0.558	C2		ANKRD54	129138	6.5769e-102	-1.66348	0.078	0.44	C3
SLC35E1	79939	8.00245e-16	1.38151	0.726	0.634	C0		SAMM50	25813	3.42466e-159	3.36648	0.877	0.637	C1		TMEM164	84187	1.44801e-08	-5.86262	0.5	0.556	C2		XPO7	23039	1.23104e-77	-1.66442	0.117	0.427	C3
BCKDHB	594	1.86148e-20	1.37372	0.483	0.38	C0		NFIC	4782	2.55342e-238	3.36355	0.924	0.658	C1		CCDC57	284001	5.30918e-07	-5.86754	0.786	0.762	C2		GEMIN5	25929	2.81143e-71	-1.66534	0.075	0.361	C3
MRPL57	78988	0.000117949	1.36737	0.962	0.865	C0		PBK	55872	0	3.36275	0.847	0.216	C1		SUCO	51430	0.000400369	-5.86769	0.248	0.291	C2		EID2	163126	3.49786e-90	-1.66594	0.073	0.406	C3
SASH1	23328	3.89782e-07	1.36536	0.384	0.325	C0		PURA	5813	1.80864e-140	3.35708	0.858	0.614	C1		LINC00514	283875	1.09157e-22	-5.87904	0.773	0.779	C2		AHI1	54806	1.31145e-66	-1.66616	0.058	0.326	C3
PPFIBP1	8496	9.29114e-50	1.36471	0.454	0.295	C0		ZMPSTE24	10269	2.73608e-172	3.35271	0.937	0.737	C1		UBE2V2	7336	0.00516045	-5.88208	0.918	0.814	C2		ARHGEF18	23370	8.53697e-79	-1.66625	0.08	0.387	C3
SURF1	6834	1.59037e-37	1.35852	0.91	0.763	C0		PFKP	5214	1.29992e-283	3.35066	0.942	0.667	C1		SURF1	6834	2.49309e-12	-5.8923	0.845	0.827	C2		ZC3H4	23211	2.5443e-75	-1.6665	0.134	0.442	C3
DIS3L2	129563	4.1292e-08	1.35524	0.352	0.294	C0		SDF4	51150	2.00859e-131	3.34986	0.929	0.741	C1		ZNF467	168544	2.11494e-11	-5.90258	0.449	0.526	C2		EML2	24139	7.80465e-86	-1.66777	0.099	0.425	C3
LMF1	64788	5.30844e-20	1.34968	0.317	0.224	C0		MED4	29079	1.52111e-162	3.34453	0.933	0.715	C1		RPP40	10799	0.000780554	-5.90645	0.666	0.591	C2		FXR2	9513	2.45063e-96	-1.66922	0.08	0.43	C3
C16orf72	29035	0.00153104	1.3495	0.486	0.442	C0		GOT2	2806	8.63663e-200	3.33715	0.84	0.549	C1		GSTM4	2948	2.07774e-09	-5.93238	0.486	0.55	C2		LRG1	116844	1.02541e-67	-1.66986	0.087	0.366	C3
IL13RA1	3597	2.16132e-11	1.34735	0.687	0.596	C0		PRPF38B	55119	3.57627e-184	3.33592	0.897	0.641	C1		GPAA1	8733	0.00296718	-5.93301	0.848	0.797	C2		D2HGDH	728294	2.60463e-108	-1.66988	0.087	0.463	C3
MTA3	57504	1.13557e-41	1.34711	0.886	0.738	C0		EBPL	84650	2.97394e-219	3.33349	0.999	0.924	C1		GFPT1	2673	0.00020868	-5.93554	0.593	0.609	C2		C11orf49	79096	3.05376e-107	-1.67017	0.095	0.471	C3
GPRC5C	55890	9.59933e-19	1.34695	0.449	0.352	C0		NT5DC2	64943	9.39173e-189	3.33002	0.68	0.336	C1		ITGB5	3693	0.000169369	-5.93739	0.725	0.71	C2		GCN1	10985	7.90147e-98	-1.6703	0.085	0.439	C3
FERMT2	10979	0.00018024	1.34395	0.524	0.474	C0		EMC4	51234	8.04867e-193	3.32759	0.97	0.828	C1		RNF13	11342	0.00262955	-5.94177	0.846	0.792	C2		GON4L	54856	2.35584e-112	-1.6708	0.103	0.492	C3
ATAD2B	54454	7.18815e-05	1.33946	0.265	0.225	C0		FGD5-AS1	100505641	5.20396e-161	3.32373	0.718	0.407	C1		TCEA2	6919	7.01664e-07	-5.95769	0.651	0.675	C2		NAA30	122830	6.36571e-93	-1.67286	0.124	0.473	C3
MYO6	4646	5.34979e-30	1.33901	0.717	0.591	C0		PCBP1	5093	0	3.31844	1	0.938	C1		SLC35E1	79939	0.00012098	-5.98052	0.689	0.673	C2		GLCE	26035	5.82635e-101	-1.67315	0.086	0.448	C3
SESTD1	91404	4.7052e-12	1.33624	0.279	0.342	C0		SCAMP1	9522	1.97438e-73	3.31823	0.807	0.609	C1		PDIA3	2923	0.00713167	-5.98214	0.943	0.867	C2		SENP3	26168	6.52543e-88	-1.67474	0.091	0.423	C3
SLC22A31	146429	8.84145e-42	1.33463	0.325	0.194	C0		NFATC2IP	84901	3.88317e-265	3.30678	0.788	0.386	C1		PDS5A	23244	0.000867903	-5.98826	0.884	0.784	C2		RAD51	5888	4.37103e-45	-1.67482	0.064	0.269	C3
RAB5B	5869	7.71551e-28	1.33072	0.697	0.567	C0		DNPEP	23549	7.48576e-156	3.30356	0.958	0.787	C1		CFLAR	8837	1.70412e-05	-6.01784	0.626	0.647	C2		SLC5A3	6526	3.16346e-65	-1.67535	0.076	0.346	C3
PUSL1	126789	5.35796e-06	1.32994	0.51	0.529	C0		PCYT1A	5130	1.40592e-92	3.30128	0.808	0.607	C1		TFAM	7019	1.60661e-17	-6.04061	0.87	0.717	C2		CBLL1	79872	3.53972e-96	-1.67549	0.089	0.441	C3
PET117	100303755	3.40777e-08	1.32847	0.647	0.638	C0		ARHGAP35	2909	7.87127e-116	3.29819	0.852	0.647	C1		MBD4	8930	0.00631738	-6.04497	0.843	0.784	C2		TMEM115	11070	4.38729e-114	-1.67755	0.079	0.466	C3
PUM1	9698	2.75668e-20	1.32698	0.794	0.683	C0		BCLAF1	9774	3.27391e-214	3.29752	0.949	0.764	C1		MMS22L	253714	4.96562e-12	-6.05441	0.378	0.275	C2		TEAD4	7004	2.94734e-60	-1.68129	0.091	0.35	C3
EXOC7	23265	2.12876e-18	1.32641	0.397	0.302	C0		SINHCAF	58516	5.7657e-174	3.29116	0.824	0.541	C1		SMCHD1	23347	0.000326826	-6.05476	0.584	0.498	C2		TWSG1	57045	2.67171e-82	-1.68228	0.068	0.381	C3
YIPF3	25844	1.1707e-63	1.32093	0.902	0.731	C0		CCAR1	55749	2.08029e-189	3.2883	0.914	0.699	C1		WDR74	54663	9.10693e-10	-6.06852	0.822	0.714	C2		PEX1	5189	3.07431e-103	-1.68275	0.082	0.449	C3
PPP3CA	5530	6.15119e-29	1.3177	0.915	0.809	C0		SFT2D2	375035	1.067e-187	3.28766	0.815	0.516	C1		ZDHHC12	84885	8.89072e-06	-6.08014	0.91	0.817	C2		CHST15	51363	2.73935e-78	-1.68387	0.078	0.384	C3
RASGEF1A	221002	3.1808e-30	1.3172	0.497	0.375	C0		ETV4	2118	4.21104e-144	3.28691	0.88	0.66	C1		TNFAIP1	7126	0.00115072	-6.08435	0.565	0.578	C2		ZNF286A	57335	8.36418e-52	-1.68412	0.096	0.332	C3
TSR3	115939	4.71247e-06	1.31453	0.916	0.794	C0		HSD17B10	3028	4.38916e-216	3.28484	0.983	0.843	C1		NCAPG	64151	1.6276e-51	-6.0956	0.506	0.261	C2		AP3S2	10239	3.68016e-111	-1.68595	0.091	0.475	C3
GID8	54994	0.00467758	1.31221	0.985	0.885	C0		ACD	65057	3.68245e-217	3.2836	0.729	0.374	C1		THOP1	7064	4.49942e-06	-6.09997	0.44	0.356	C2		NUP98	4928	1.49638e-89	-1.68625	0.09	0.426	C3
STRN3	29966	0.000767663	1.30973	0.644	0.576	C0		CERS6	253782	2.72039e-141	3.27607	0.511	0.218	C1		TMEM219	124446	7.54239e-06	-6.11592	0.765	0.737	C2		PDXP	57026	2.31871e-87	-1.68708	0.054	0.377	C3
PJA2	9867	9.31071e-65	1.30845	0.694	0.524	C0		CCSAP	126731	1.04104e-169	3.27457	0.555	0.232	C1		HSD17B4	3295	0.000726221	-6.12045	0.698	0.703	C2		ABR	29	7.99421e-92	-1.68822	0.086	0.424	C3
MVP	9961	3.13824e-90	1.30635	0.664	0.447	C0		SNAPC5	10302	1.28317e-130	3.27452	0.776	0.52	C1		LYAR	55646	1.22478e-21	-6.12319	0.623	0.468	C2		SLC48A1	55652	3.05101e-79	-1.68838	0.083	0.391	C3
LRRFIP2	9209	1.44003e-22	1.30517	0.326	0.424	C0		RMI1	80010	0	3.27194	0.679	0.21	C1		MGMT	4255	6.45205e-05	-6.12466	0.894	0.827	C2		AK3	50808	4.92953e-90	-1.68897	0.126	0.465	C3
RAB4A	5867	7.53081e-23	1.30437	0.927	0.805	C0		SF3A3	10946	0	3.27171	0.926	0.604	C1		ANKH	56172	9.41619e-14	-6.12711	0.574	0.631	C2		AGO1	26523	1.97136e-81	-1.68932	0.141	0.462	C3
PLXNA1	5361	1.62943e-31	1.29835	0.515	0.389	C0		TRIM16L	147166	3.86146e-283	3.27158	0.979	0.793	C1		CHKA	1119	1.52792e-07	-6.12779	0.494	0.416	C2		VPS37C	55048	2.00049e-98	-1.69107	0.1	0.454	C3
MTURN	222166	1.59173e-62	1.29789	0.359	0.529	C0		SND1	27044	6.59219e-96	3.26962	0.889	0.702	C1		HELLS	3070	3.58533e-44	-6.15401	0.677	0.393	C2		SLC2A8	29988	1.40545e-100	-1.69205	0.096	0.457	C3
TMEM192	201931	2.06405e-13	1.295	0.616	0.531	C0		HNRNPUL2	221092	3.43987e-151	3.26905	0.818	0.555	C1		SOWAHC	65124	0.000180968	-6.18023	0.381	0.427	C2		NPRL3	8131	2.38281e-112	-1.6921	0.102	0.49	C3
HES6	55502	6.13085e-20	1.2949	0.291	0.382	C0		R3HDM1	23518	2.99861e-160	3.26825	0.697	0.379	C1		CCDC66	285331	0.00893236	-6.19991	0.394	0.352	C2		GTF2F1	2962	9.99249e-89	-1.69217	0.106	0.443	C3
GABARAPL2	11345	8.92378e-41	1.28836	0.99	0.883	C0		KCTD3	51133	2.99549e-220	3.26532	0.724	0.361	C1		SEMA3C	10512	2.16102e-07	-6.2065	0.33	0.401	C2		AGPAT3	56894	2.11059e-84	-1.69274	0.072	0.393	C3
ABHD16A	7920	2.92729e-47	1.27465	0.668	0.511	C0		YPEL3	83719	5.1118e-28	3.26474	0.589	0.452	C1		SSRP1	6749	1.3132e-36	-6.2081	0.97	0.844	C2		SLC25A26	115286	7.95531e-101	-1.69462	0.07	0.427	C3
CDC23	8697	4.14107e-27	1.27192	0.531	0.589	C0		PREB	10113	9.69753e-105	3.26333	0.695	0.456	C1		RRM1	6240	1.62937e-29	-6.2336	0.714	0.489	C2		SOS1	6654	2.43438e-83	-1.69475	0.118	0.439	C3
RAB17	64284	1.59286e-18	1.2661	0.511	0.402	C0		RAB1B	81876	8.44501e-221	3.26235	0.99	0.855	C1		SPC25	57405	2.44063e-43	-6.23435	0.557	0.299	C2		TBL3	10607	2.73443e-115	-1.6949	0.087	0.481	C3
AACS	65985	6.34171e-11	1.26518	0.567	0.49	C0		SUN2	25777	3.51993e-112	3.26176	0.691	0.444	C1		MVB12A	93343	0.000424487	-6.24744	0.848	0.801	C2		GCA	25801	4.05335e-107	-1.69492	0.096	0.471	C3
CYP4F3	4051	1.00337e-07	1.25701	0.287	0.233	C0		HDGF	3068	2.24059e-288	3.25943	0.998	0.904	C1		NOC2L	26155	0.00419702	-6.26495	0.772	0.687	C2		PILRB	29990	9.4921e-82	-1.69539	0.106	0.422	C3
ZFAND3	60685	6.26037e-22	1.2558	0.628	0.506	C0		PRKCI	5584	2.20045e-87	3.25927	0.908	0.758	C1		TMEM254	80195	6.85403e-05	-6.2663	0.611	0.635	C2		ST7	7982	4.50401e-82	-1.69591	0.085	0.401	C3
PLPP5	84513	4.46216e-25	1.25557	0.635	0.52	C0		RMDN1	51115	1.02043e-125	3.25378	0.865	0.64	C1		AP1AR	55435	3.98465e-06	-6.27304	0.76	0.746	C2		GRHL2	79977	1.87174e-76	-1.69602	0.144	0.455	C3
AGA	175	2.25396e-46	1.25484	0.848	0.71	C0		RPF1	80135	4.64686e-133	3.25368	0.779	0.51	C1		TIMM10	26519	1.04501e-05	-6.28353	0.952	0.846	C2		INTS5	80789	6.00792e-95	-1.69614	0.115	0.464	C3
WNT11	7481	1.7407e-46	1.25441	0.315	0.175	C0		FAH	2184	8.10455e-128	3.25102	0.867	0.638	C1		GAS2L3	283431	3.46078e-23	-6.29979	0.255	0.136	C2		MSRA	4482	1.08195e-106	-1.69616	0.091	0.466	C3
EPHX3	79852	2.07501e-06	1.2542	0.357	0.309	C0		GDE1	51573	3.81566e-108	3.25089	0.914	0.758	C1		MTX2	10651	0.000552508	-6.32181	0.919	0.852	C2		LINC01588	283551	1.64871e-83	-1.69664	0.082	0.402	C3
NIPSNAP1	8508	4.23971e-17	1.25266	0.696	0.58	C0		PHF14	9678	5.26124e-130	3.25054	0.844	0.625	C1		FAM89B	23625	0.000206807	-6.32225	0.751	0.745	C2		DAB2IP	153090	1.78008e-84	-1.69774	0.065	0.383	C3
C6orf132	647024	4.03677e-13	1.25261	0.395	0.316	C0		DHPS	1725	1.06267e-181	3.2484	0.964	0.761	C1		EFR3A	23167	8.21696e-08	-6.32243	0.703	0.713	C2		SLC30A6	55676	2.45952e-108	-1.69799	0.094	0.471	C3
TMEM167B	56900	3.29853e-10	1.25247	0.449	0.373	C0		PKP2	5318	6.7377e-81	3.24649	0.612	0.383	C1		PSMB8	5696	0.00215642	-6.32245	0.634	0.568	C2		NEK6	10783	1.27156e-85	-1.69819	0.096	0.42	C3
BNIP2	663	0.00405362	1.25148	0.486	0.44	C0		ENOPH1	58478	9.013e-199	3.24233	0.808	0.484	C1		YIPF3	25844	2.45025e-17	-6.34233	0.815	0.807	C2		CCDC51	79714	9.32315e-107	-1.69898	0.064	0.434	C3
NDUFA7	4701	5.36246e-06	1.25148	0.984	0.887	C0		PISD	23761	0.00197682	3.23831	0.436	0.383	C1		GRINA	2907	2.80243e-05	-6.34928	0.873	0.833	C2		RRN3	54700	3.59675e-97	-1.70021	0.09	0.443	C3
BORCS7	119032	1.94436e-18	1.24977	0.738	0.621	C0		COQ4	51117	2.76794e-107	3.23766	0.855	0.655	C1		PHTF1	10745	0.00173429	-6.35241	0.635	0.564	C2		PRPSAP2	5636	3.07934e-107	-1.70113	0.079	0.453	C3
NR2C2AP	126382	3.40388e-87	1.24939	0.423	0.594	C0		TMEM126B	55863	1.68541e-209	3.231	0.904	0.65	C1		JUNB	3726	0.00865899	-6.36905	0.933	0.878	C2		TMEM61	199964	3.36252e-87	-1.70123	0.098	0.429	C3
ESRP2	80004	1.30574e-12	1.24783	0.357	0.281	C0		NCAPG2	54892	0	3.23098	0.867	0.328	C1		EIF3K	27335	1.19718e-07	-6.36905	1	0.959	C2		NR1D2	9975	1.0401e-56	-1.70129	0.066	0.308	C3
HOOK2	29911	9.06419e-22	1.24329	0.748	0.621	C0		MTHFD1	4522	0	3.22891	0.778	0.333	C1		PSMD11	5717	0.000287643	-6.36913	0.975	0.896	C2		CLN8	2055	1.61755e-88	-1.7019	0.096	0.428	C3
CIR1	9541	8.14332e-10	1.23986	0.759	0.645	C0		UMPS	7372	5.66439e-233	3.22719	0.865	0.544	C1		ANP32A	8125	1.35992e-16	-6.37131	0.971	0.865	C2		HIBCH	26275	8.39598e-122	-1.70199	0.059	0.461	C3
OSBPL2	9885	3.21857e-25	1.2359	0.656	0.539	C0		GRPEL1	80273	7.74737e-183	3.22497	0.928	0.708	C1		HSPA8	3312	3.18236e-06	-6.37327	0.999	0.957	C2		CES2	8824	1.17795e-79	-1.70293	0.084	0.394	C3
GAK	2580	7.50388e-06	1.2306	0.497	0.434	C0		FBXO22	26263	4.12926e-162	3.22492	0.833	0.573	C1		CDC34	997	3.13427e-05	-6.37933	0.714	0.712	C2		SNHG18	100505806	8.35636e-82	-1.70335	0.065	0.375	C3
EIF3D	8664	3.1604e-15	1.22966	0.986	0.864	C0		PTDSS1	9791	2.55566e-153	3.22264	0.696	0.393	C1		TMEM38B	55151	7.13168e-09	-6.38446	0.721	0.595	C2		TMEM191B	728229	3.58584e-94	-1.70351	0.077	0.421	C3
LDLRAD3	143458	5.70582e-14	1.22767	0.534	0.444	C0		PTPA	5524	1.11489e-91	3.22115	0.79	0.586	C1		POLR3K	51728	5.27205e-05	-6.39454	0.862	0.762	C2		OTUD4	54726	2.8029e-91	-1.70431	0.092	0.432	C3
ATXN1	6310	1.57585e-40	1.2214	0.514	0.369	C0		PGAM1	5223	0	3.22064	0.996	0.839	C1		CACUL1	143384	0.0065339	-6.39661	0.684	0.665	C2		RETSAT	54884	1.34759e-74	-1.70546	0.101	0.403	C3
AP1G1	164	0.00727883	1.21917	0.679	0.634	C0		TRUB2	26995	3.03867e-145	3.21665	0.835	0.574	C1		MAP2K3	5606	8.19806e-05	-6.40884	0.862	0.755	C2		TAF4	6874	1.15081e-85	-1.70549	0.091	0.417	C3
ALDH5A1	7915	5.00764e-31	1.21914	0.656	0.529	C0		RSF1	51773	7.76143e-94	3.21592	0.858	0.692	C1		FBP1	2203	0.000488573	-6.41009	0.834	0.798	C2		ALG6	29929	1.13172e-101	-1.7079	0.116	0.479	C3
ABI1	10006	2.20639e-07	1.21795	0.65	0.581	C0		AMER1	139285	1.58786e-12	3.20949	0.273	0.197	C1		MAN2A1	4124	0.00204717	-6.42305	0.298	0.335	C2		TMEM120B	144404	7.27241e-81	-1.70864	0.144	0.463	C3
MOB3C	148932	2.97067e-17	1.21422	0.415	0.326	C0		MRPL19	9801	6.99762e-208	3.20768	0.969	0.806	C1		TM2D1	83941	2.28046e-06	-6.42594	0.855	0.797	C2		SLC52A3	113278	4.16379e-80	-1.7092	0.086	0.395	C3
R3HDM4	91300	7.24059e-22	1.20783	0.583	0.47	C0		ACIN1	22985	3.109e-139	3.20469	0.812	0.571	C1		TRAPPC4	51399	0.00302298	-6.46842	0.78	0.709	C2		KIAA1109	84162	6.3714e-88	-1.70932	0.104	0.442	C3
TNKS1BP1	85456	7.86697e-64	1.20489	0.755	0.574	C0		METTL21A	151194	7.08312e-177	3.20321	0.685	0.349	C1		IMMP1L	196294	4.65674e-31	-6.49152	0.874	0.702	C2		CCNO	10309	3.59525e-97	-1.71157	0.081	0.432	C3
TSPAN31	6302	4.80868e-61	1.20449	0.538	0.356	C0		TCERG1	10915	1.33004e-272	3.20194	0.907	0.603	C1		SMAGP	57228	4.57306e-08	-6.4961	0.654	0.67	C2		YY1AP1	55249	1.1819e-94	-1.71192	0.085	0.43	C3
ATP7A	538	1.03689e-38	1.19564	0.46	0.315	C0		ZRANB2	9406	1.39481e-115	3.20146	0.9	0.708	C1		PAK2	5062	1.77776e-13	-6.50489	0.894	0.772	C2		POMGNT1	55624	2.55393e-105	-1.71215	0.085	0.453	C3
UVRAG	7405	1.88997e-05	1.19332	0.409	0.354	C0		CLIC4	25932	1.02739e-72	3.19835	0.835	0.673	C1		CBX5	23468	6.34837e-31	-6.51162	0.951	0.803	C2		TRAPPC13	80006	2.84748e-111	-1.71291	0.097	0.479	C3
NT5C	30833	0.00107851	1.19112	0.751	0.657	C0		SMYD2	56950	9.25785e-196	3.19626	0.813	0.505	C1		NONO	4841	5.60361e-05	-6.51419	0.984	0.906	C2		PRORP	9692	3.45613e-99	-1.71388	0.111	0.469	C3
TMC5	79838	0.00483155	1.18711	0.387	0.354	C0		SERTAD4	56256	2.02242e-274	3.19559	0.797	0.4	C1		FAM207A	85395	1.46929e-09	-6.51571	0.568	0.614	C2		SLC29A1	2030	6.34177e-62	-1.714	0.066	0.323	C3
AKAP8L	26993	0.00107053	1.18276	0.467	0.42	C0		TTC9C	283237	1.70584e-129	3.19154	0.701	0.427	C1		CLIP1	6249	0.000539037	-6.52185	0.758	0.732	C2		RTKN	6242	1.44117e-112	-1.71446	0.08	0.465	C3
MTSS1	9788	3.22529e-24	1.18192	0.368	0.268	C0		COX11	1353	1.20476e-94	3.19046	0.774	0.541	C1		SYNCRIP	10492	1.90005e-11	-6.52294	0.98	0.895	C2		UQCC1	55245	6.26195e-75	-1.71458	0.075	0.371	C3
STX6	10228	3.01247e-09	1.17682	0.437	0.373	C0		API5	8539	6.40924e-128	3.18335	0.834	0.604	C1		CSE1L	1434	7.19026e-43	-6.53857	0.95	0.777	C2		NAA35	60560	7.31175e-96	-1.71681	0.122	0.474	C3
BAIAP2	10458	1.69299e-12	1.1704	0.641	0.551	C0		SPAG5	10615	2.10541e-258	3.18052	0.532	0.147	C1		RUVBL1	8607	2.4605e-12	-6.55155	0.948	0.849	C2		PRR15L	79170	3.74484e-68	-1.7171	0.077	0.357	C3
COPS2	9318	3.38467e-10	1.16963	0.712	0.621	C0		HAUS1	115106	0	3.18052	0.81	0.362	C1		TMEM150A	129303	3.51038e-15	-6.55922	0.333	0.433	C2		SNHG9	735301	6.74644e-88	-1.71715	0.054	0.379	C3
SLC35A1	10559	1.12807e-08	1.16437	0.397	0.329	C0		PTPN1	5770	1.62795e-117	3.17307	0.851	0.637	C1		CRIP2	1397	1.30696e-10	-6.56158	0.695	0.726	C2		GBE1	2632	4.48804e-90	-1.71728	0.069	0.403	C3
IPO7	10527	0.00879801	1.16262	0.784	0.744	C0		NXPH4	11247	1.03026e-163	3.17259	0.691	0.368	C1		METTL23	124512	0.00356824	-6.56553	0.806	0.754	C2		POLE2	5427	2.18518e-53	-1.71966	0.037	0.258	C3
SLCO4A1	28231	4.7464e-12	1.16256	0.341	0.404	C0		KDSR	2531	3.23442e-230	3.16623	0.75	0.38	C1		DDOST	1650	0.00352807	-6.59131	0.936	0.855	C2		XPR1	9213	6.57735e-86	-1.72096	0.076	0.399	C3
KLF3	51274	1.74786e-05	1.15949	0.725	0.638	C0		NSD1	64324	4.9782e-136	3.16579	0.874	0.636	C1		NOL8	55035	1.30965e-05	-6.60163	0.522	0.451	C2		THUMPD2	80745	6.7885e-62	-1.72159	0.081	0.345	C3
NFAT5	10725	2.16987e-29	1.15578	0.522	0.393	C0		HMGN4	10473	4.7426e-90	3.16566	0.644	0.403	C1		SAE1	10055	3.74876e-35	-6.61085	0.856	0.658	C2		RRP9	9136	3.75841e-102	-1.72207	0.072	0.432	C3
SRSF8	10929	2.22167e-09	1.15487	0.482	0.408	C0		PPIE	10450	8.99083e-237	3.15699	0.933	0.678	C1		DDX39B	7919	3.75776e-10	-6.61445	0.95	0.858	C2		IDE	3416	5.56468e-110	-1.72266	0.102	0.481	C3
NPLOC4	55666	1.07326e-05	1.14508	0.771	0.691	C0		CENPB	1059	3.83037e-173	3.15696	0.732	0.418	C1		TOM1L2	146691	2.20817e-13	-6.62309	0.31	0.402	C2		MARS	4141	2.59567e-111	-1.72332	0.066	0.446	C3
FAM192A	80011	3.43012e-09	1.14375	0.849	0.784	C0		SNX10	29887	1.04206e-144	3.15694	0.658	0.35	C1		PFDN4	5203	2.98453e-06	-6.63421	0.952	0.866	C2		CCPG1	9236	1.022e-91	-1.72419	0.087	0.428	C3
LINC00472	79940	9.64902e-25	1.13546	0.278	0.18	C0		RCN2	5955	2.33044e-223	3.15551	0.972	0.798	C1		ZSWIM7	125150	9.12189e-05	-6.64534	0.779	0.761	C2		PELP1	27043	1.68165e-88	-1.72449	0.095	0.432	C3
COQ10B	80219	3.15737e-14	1.1352	0.867	0.728	C0		PHF6	84295	4.17147e-118	3.15451	0.82	0.602	C1		LYPD6B	130576	6.80439e-06	-6.65324	0.778	0.76	C2		CTDSP1	58190	3.34628e-104	-1.72557	0.103	0.47	C3
ZNF750	79755	9.96546e-46	1.12306	0.298	0.164	C0		NUP107	57122	1.47577e-283	3.1534	0.804	0.404	C1		TMEM184B	25829	0.00286281	-6.67188	0.795	0.757	C2		SLC9A7	84679	1.9789e-60	-1.72709	0.048	0.295	C3
CORO1C	23603	1.37776e-13	1.12297	0.516	0.568	C0		RELL1	768211	9.61981e-193	3.14606	0.709	0.362	C1		ZFPM1	161882	4.99681e-12	-6.69519	0.51	0.587	C2		STK40	83931	8.1438e-69	-1.72746	0.071	0.348	C3
ACOT13	55856	0.000159957	1.11857	0.951	0.858	C0		ATAD3A	55210	3.40867e-193	3.14339	0.695	0.346	C1		U2AF2	11338	7.07722e-06	-6.71339	0.873	0.772	C2		MTF1	4520	1.14773e-81	-1.72862	0.117	0.437	C3
MYO5B	4645	1.02082e-12	1.11739	0.5	0.419	C0		ZMYM1	79830	2.29809e-102	3.14311	0.493	0.246	C1		TAPBP	6892	6.18536e-07	-6.73844	0.687	0.707	C2		CHEK1	1111	4.70656e-51	-1.7302	0.051	0.27	C3
SRSF5	6430	2.04075e-10	1.11356	0.972	0.844	C0		ARPP19	10776	0	3.14304	0.968	0.706	C1		SIN3B	23309	5.00929e-08	-6.74371	0.565	0.603	C2		LMF1	64788	4.43519e-67	-1.73029	0.038	0.301	C3
B4GALT7	11285	2.91572e-26	1.11194	0.643	0.511	C0		ATAD5	79915	0	3.14278	0.61	0.142	C1		SMIM15	643155	9.20558e-07	-6.74471	0.842	0.754	C2		C2orf49	79074	5.29553e-109	-1.73045	0.096	0.475	C3
ANO1	55107	5.2281e-13	1.10909	0.61	0.648	C0		ESRP1	54845	1.71372e-168	3.14221	0.936	0.748	C1		NOP16	51491	2.5216e-19	-6.75081	0.797	0.653	C2		MCOLN1	57192	1.05797e-86	-1.73087	0.068	0.392	C3
BICDL2	146439	8.30893e-51	1.10739	0.592	0.436	C0		CBL	867	1.09364e-71	3.14063	0.423	0.214	C1		NCCRP1	342897	0.00263341	-6.76958	0.253	0.288	C2		C4orf33	132321	3.88708e-111	-1.73113	0.074	0.454	C3
GPATCH4	54865	1.53842e-20	1.10247	0.548	0.6	C0		ARF3	377	4.05015e-120	3.1399	0.957	0.795	C1		DNPEP	23549	0.000286778	-6.79178	0.865	0.821	C2		FAHD2A	51011	1.06848e-100	-1.73138	0.083	0.442	C3
RRAS2	22800	3.10741e-06	1.09964	0.61	0.554	C0		HTATSF1	27336	1.27497e-223	3.13416	0.995	0.89	C1		PNPLA8	50640	4.11218e-13	-6.79398	0.62	0.678	C2		UNKL	64718	1.30994e-69	-1.73179	0.1	0.387	C3
ARID3A	1820	2.53223e-16	1.09779	0.548	0.458	C0		REEP4	80346	1.24098e-110	3.13381	0.651	0.39	C1		SH3GLB2	56904	1.13703e-05	-6.79605	0.934	0.857	C2		AZI2	64343	2.48866e-92	-1.73223	0.107	0.454	C3
EVI5	7813	7.39576e-17	1.09672	0.539	0.441	C0		FYTTD1	84248	3.16308e-164	3.12891	0.937	0.745	C1		CHIC2	26511	9.44825e-07	-6.79707	0.405	0.454	C2		ZCCHC3	85364	1.28789e-86	-1.73249	0.094	0.422	C3
GMPPA	29926	2.24817e-24	1.09237	0.768	0.627	C0		RASAL2	9462	1.17773e-50	3.12561	0.531	0.344	C1		P4HA2	8974	5.57471e-08	-6.80018	0.25	0.322	C2		UHRF1BP1L	23074	3.68945e-74	-1.73257	0.106	0.409	C3
CELSR2	1952	2.24692e-09	1.08998	0.333	0.269	C0		RANGAP1	5905	6.76293e-166	3.12549	0.781	0.478	C1		NAV1	89796	5.36744e-05	-6.8043	0.329	0.374	C2		SLC22A23	63027	3.79836e-76	-1.73301	0.072	0.37	C3
MXD4	10608	5.00774e-171	1.08825	0.826	0.569	C0		SSX2IP	117178	0	3.12124	0.645	0.201	C1		SPRYD7	57213	0.000199829	-6.82002	0.802	0.753	C2		AC118549.1		6.69475e-104	-1.73405	0.144	0.515	C3
CFAP410	755	5.45564e-05	1.08687	0.378	0.331	C0		RAB14	51552	2.14376e-149	3.11499	0.966	0.802	C1		MAGT1	84061	0.000241136	-6.84729	0.77	0.726	C2		MIF4GD	57409	2.69049e-88	-1.73604	0.115	0.45	C3
BICDL1	92558	8.15799e-40	1.0852	0.485	0.344	C0		PITPNA	5306	2.82344e-141	3.11473	0.872	0.647	C1		MSMB	4477	4.80286e-07	-6.85505	0.229	0.293	C2		MLLT10	8028	1.26774e-93	-1.73774	0.103	0.451	C3
GART	2618	2.42745e-39	1.07832	0.437	0.539	C0		PRMT2	3275	8.57567e-92	3.11322	0.768	0.546	C1		HARS	3035	4.37741e-05	-6.85718	0.722	0.652	C2		SLC36A4	120103	1.86968e-89	-1.73778	0.089	0.424	C3
RAP1B	5908	0.000798985	1.0769	0.918	0.803	C0		CCNG1	900	6.35562e-39	3.10759	0.619	0.466	C1		TP53	7157	2.36221e-11	-6.87733	0.91	0.794	C2		BCR	613	1.52929e-79	-1.7381	0.092	0.403	C3
PLPP1	8611	3.01217e-28	1.07264	0.37	0.252	C0		SNAP47	116841	4.58124e-138	3.10371	0.835	0.589	C1		MLX	6945	8.63593e-07	-6.87746	0.749	0.743	C2		SPIRE2	84501	2.25971e-83	-1.73832	0.054	0.366	C3
WDR13	64743	6.24306e-30	1.06291	0.527	0.4	C0		TSR1	55720	1.63742e-113	3.10215	0.711	0.458	C1		RDH11	51109	2.24633e-08	-6.88621	0.828	0.812	C2		FBXO6	26270	2.17856e-86	-1.74027	0.074	0.397	C3
CMTM8	152189	1.63054e-12	1.06269	0.756	0.661	C0		WWTR1	25937	1.15128e-169	3.10019	0.876	0.618	C1		PAQR5	54852	1.92603e-05	-6.89464	0.242	0.293	C2		MARCH2	51257	5.27796e-112	-1.74079	0.064	0.446	C3
CRIP2	1397	5.73697e-16	1.05841	0.782	0.67	C0		ANKS6	203286	2.32447e-78	3.09943	0.577	0.353	C1		KCTD1	284252	2.27964e-05	-6.89534	0.555	0.586	C2		RNF220	55182	6.07218e-105	-1.74251	0.096	0.465	C3
SH3BGRL2	83699	1.09171e-05	1.05827	0.409	0.361	C0		FBXO7	25793	1.3984e-136	3.0973	0.836	0.6	C1		ARHGEF9	23229	3.51094e-09	-6.91008	0.526	0.583	C2		GUCD1	83606	5.2476e-83	-1.74409	0.12	0.443	C3
SNHG18	100505806	3.83459e-50	1.04452	0.42	0.263	C0		SMC5	23137	2.10513e-197	3.0957	0.852	0.562	C1		MUC16	94025	5.05313e-18	-6.93761	0.593	0.663	C2		SEL1L	6400	1.96947e-88	-1.74537	0.101	0.434	C3
PPM1A	5494	0.000919381	1.04357	0.638	0.576	C0		SEM1	7979	0	3.09541	1	0.972	C1		MYD88	4615	1.08204e-07	-6.94304	0.231	0.299	C2		NUP160	23279	2.12957e-100	-1.74567	0.086	0.445	C3
TRIM44	54765	0.00174328	1.04117	0.649	0.642	C0		SMARCD2	6603	1.19734e-130	3.0951	0.806	0.562	C1		TMEM139	135932	4.01403e-15	-6.95344	0.466	0.54	C2		BMI1	648	6.78853e-94	-1.74691	0.107	0.451	C3
C1orf115	79762	8.22001e-14	1.03435	0.298	0.222	C0		SPATS2L	26010	1.30607e-241	3.09299	0.981	0.828	C1		TRMT10C	54931	2.03527e-06	-6.95688	0.915	0.827	C2		CBWD5	220869	1.64977e-118	-1.74724	0.074	0.472	C3
JMJD6	23210	1.15762e-06	1.0337	0.357	0.399	C0		SCCPDH	51097	6.12933e-51	3.09082	0.387	0.216	C1		JCAD	57608	7.68216e-16	-6.96501	0.227	0.328	C2		CAP2	10486	3.80096e-99	-1.74727	0.079	0.436	C3
FAM8A1	51439	1.35173e-29	1.03304	0.323	0.209	C0		KIAA0100	9703	5.22303e-115	3.08932	0.785	0.548	C1		IL4R	3566	4.4662e-08	-6.9764	0.505	0.547	C2		SIK3	23387	4.60382e-67	-1.74802	0.062	0.336	C3
SLC2A10	81031	5.0828e-28	1.03093	0.349	0.235	C0		KPNA1	3836	1.70285e-181	3.08211	0.886	0.614	C1		RNF149	284996	4.19841e-07	-6.98427	0.674	0.679	C2		CSGALNACT1	55790	2.39483e-79	-1.7492	0.09	0.4	C3
SLC39A7	7922	1.38562e-09	1.03092	0.703	0.626	C0		PQBP1	10084	9.26953e-115	3.08188	0.833	0.59	C1		RAB14	51552	3.38407e-05	-6.98669	0.883	0.833	C2		VPS13C	54832	1.9687e-91	-1.75185	0.09	0.432	C3
FARP1	10160	1.53468e-08	1.02321	0.769	0.672	C0		MOB1A	55233	2.40122e-289	3.0812	0.991	0.861	C1		SPTLC2	9517	1.6306e-08	-7.01408	0.67	0.68	C2		PTCD3	55037	7.69022e-110	-1.75282	0.099	0.479	C3
DOK4	55715	1.33609e-17	1.02191	0.33	0.245	C0		CHTOP	26097	7.07131e-201	3.0811	0.919	0.677	C1		PTOV1	53635	0.000100727	-7.01815	0.826	0.795	C2		TANC2	26115	2.91934e-85	-1.75289	0.1	0.423	C3
AC015712.1		1.06461e-19	1.01979	0.373	0.277	C0		EED	8726	3.22153e-254	3.08058	0.747	0.354	C1		TCEA1	6917	1.68443e-07	-7.03514	0.909	0.803	C2		DDX19B	11269	2.23965e-128	-1.75423	0.076	0.493	C3
BRCC3	79184	4.95287e-19	1.01702	0.578	0.618	C0		ROCK2	9475	5.16966e-171	3.07752	0.792	0.5	C1		ABCC5	10057	2.61371e-10	-7.04649	0.633	0.665	C2		UBN2	254048	2.85466e-91	-1.75641	0.111	0.454	C3
ELK3	2004	0.000961407	1.01492	0.384	0.408	C0		PHF20	51230	1.42425e-158	3.07184	0.896	0.66	C1		ORC6	23594	8.83045e-62	-7.05536	0.715	0.407	C2		LIMK1	3984	2.90286e-104	-1.75726	0.098	0.467	C3
NSUN5	55695	1.76356e-06	1.00769	0.65	0.636	C0		PEF1	553115	1.00692e-173	3.07026	0.942	0.742	C1		PPIH	10465	1.00565e-41	-7.07735	0.946	0.765	C2		POP1	10940	8.73227e-78	-1.75797	0.126	0.435	C3
DHX36	170506	0.00087377	1.00492	0.82	0.713	C0		NDUFB5	4711	3.24313e-250	3.06987	0.999	0.921	C1		TOMM70	9868	8.15715e-11	-7.12263	0.841	0.816	C2		MYO9B	4650	3.03234e-76	-1.75843	0.083	0.383	C3
ENDOV	284131	3.11156e-12	1.00301	0.743	0.62	C0		APOO	79135	3.09593e-184	3.069	0.818	0.516	C1		FEZ2	9637	1.62189e-09	-7.12517	0.734	0.732	C2		WASHC4	23325	1.38319e-111	-1.75928	0.088	0.474	C3
SLC22A23	63027	6.63215e-19	1.00062	0.382	0.288	C0		TARS	6897	1.61166e-252	3.06776	0.984	0.834	C1		ATP6V1E1	529	0.00063954	-7.13273	0.77	0.739	C2		MIR193BHG	100129781	1.62998e-64	-1.75973	0.079	0.35	C3
SPIRE2	84501	1.82047e-15	0.993785	0.371	0.287	C0		SAAL1	113174	6.50323e-261	3.06774	0.841	0.474	C1		CEP55	55165	5.76123e-133	-7.13361	0.69	0.321	C2		PXDC1	221749	5.18551e-79	-1.7608	0.073	0.378	C3
ODF3B	440836	8.11033e-26	0.989505	0.261	0.163	C0		SMCO4	56935	1.91564e-289	3.06531	0.569	0.158	C1		XIAP	331	0.00157295	-7.14302	0.846	0.794	C2		SHOC2	8036	1.49677e-78	-1.763	0.121	0.432	C3
ZBTB18	10472	3.2677e-05	0.986851	0.401	0.351	C0		SUMO2	6613	0	3.06513	0.999	0.956	C1		PIR	8544	0.000131733	-7.14501	0.92	0.81	C2		NF2	4771	2.05363e-92	-1.76336	0.096	0.438	C3
DNER	92737	3.42288e-22	0.984996	0.395	0.308	C0		GRHPR	9380	1.9565e-146	3.06218	0.92	0.713	C1		CLIC4	25932	3.16012e-09	-7.14571	0.703	0.715	C2		PAAF1	80227	3.28927e-118	-1.7649	0.09	0.486	C3
GALNT3	2591	0.000174909	0.984616	0.71	0.656	C0		DNTTIP1	116092	9.14471e-173	3.06154	0.976	0.804	C1		HNRNPM	4670	1.19029e-21	-7.14653	0.991	0.902	C2		VPS16	64601	3.29203e-125	-1.76525	0.051	0.461	C3
NRCAM	4897	7.63541e-16	0.98128	0.372	0.285	C0		CYREN	78996	2.58366e-176	3.06021	0.797	0.494	C1		DDR1	780	6.41437e-09	-7.17664	0.654	0.677	C2		ATRN	8455	1.15104e-98	-1.76575	0.083	0.438	C3
RETSAT	54884	7.85559e-13	0.978884	0.408	0.326	C0		CDC42SE1	56882	3.71824e-61	3.05761	0.773	0.613	C1		C19orf48	84798	3.583e-10	-7.18319	0.822	0.73	C2		WNT11	7481	2.49707e-54	-1.766	0.041	0.268	C3
ARSD	414	1.44264e-32	0.97638	0.627	0.489	C0		RBM28	55131	8.21673e-163	3.05756	0.822	0.552	C1		PSMD14	10213	0.000739902	-7.18664	0.903	0.802	C2		CHD6	84181	6.04231e-109	-1.76713	0.089	0.465	C3
ANK3	288	8.74216e-50	0.976051	0.628	0.478	C0		TRIM28	10155	9.58557e-216	3.05613	0.947	0.721	C1		CCNQ	92002	0.0057247	-7.19514	0.8	0.708	C2		POGZ	23126	8.03127e-99	-1.76755	0.094	0.449	C3
CNBD2	140894	3.07765e-06	0.971065	0.285	0.238	C0		WIPF2	147179	8.08966e-120	3.05404	0.811	0.585	C1		NOG	9241	0.00535216	-7.2071	0.484	0.431	C2		WDFY2	115825	4.55059e-96	-1.76773	0.086	0.434	C3
GATA2-AS1	101927167	1.86154e-22	0.962594	0.61	0.491	C0		GTPBP8	29083	3.73425e-117	3.05218	0.655	0.383	C1		CDC37	11140	0.00933359	-7.20935	0.947	0.871	C2		FAM153CP	653316	5.38588e-73	-1.76862	0.088	0.383	C3
UNC5A	90249	1.02953e-23	0.961837	0.399	0.296	C0		KLHDC3	116138	4.11808e-179	3.0521	0.792	0.496	C1		RXRA	6256	0.000187244	-7.23837	0.782	0.755	C2		PATL1	219988	9.4412e-90	-1.76869	0.097	0.432	C3
CCDC57	284001	3.38505e-19	0.957334	0.831	0.713	C0		PARP2	10038	4.65344e-301	3.04762	0.697	0.264	C1		C1GALT1	56913	1.11673e-05	-7.27734	0.686	0.686	C2		KIF13A	63971	7.46505e-81	-1.76953	0.112	0.429	C3
CBLC	23624	2.50751e-45	0.954607	0.601	0.441	C0		NABP2	79035	1.36977e-235	3.04698	0.861	0.54	C1		NCAPH	23397	1.52025e-34	-7.27928	0.527	0.293	C2		WDR4	10785	5.20181e-104	-1.77014	0.079	0.446	C3
USO1	8615	1.24465e-18	0.953279	0.669	0.561	C0		PHF5A	84844	5.09748e-276	3.04401	0.898	0.564	C1		PGAM1	5223	8.47907e-11	-7.29808	0.966	0.86	C2		FECH	2235	9.99035e-93	-1.77109	0.073	0.413	C3
VDR	7421	1.80958e-10	0.94787	0.61	0.537	C0		NAT14	57106	2.19682e-79	3.04359	0.767	0.558	C1		UNC50	25972	3.16742e-06	-7.30255	0.898	0.832	C2		SIRT2	22933	3.27877e-117	-1.77153	0.077	0.471	C3
NDUFA3	4696	7.79006e-30	0.945358	0.963	0.855	C0		SPTSSA	171546	3.95756e-40	3.03974	0.997	0.933	C1		ARF6	382	3.93277e-05	-7.3122	0.971	0.906	C2		TRIP10	9322	2.45913e-68	-1.77288	0.075	0.354	C3
GLI4	2738	1.81841e-55	0.938625	0.503	0.326	C0		ZNF704	619279	3.79817e-90	3.03539	0.953	0.816	C1		FOXA1	3169	4.76364e-08	-7.31439	0.459	0.515	C2		MEX3C	51320	1.07404e-75	-1.77381	0.074	0.371	C3
CD82	3732	1.13665e-16	0.93762	0.407	0.315	C0		BPTF	2186	7.99003e-113	3.03535	0.811	0.582	C1		MCM4	4173	9.85541e-25	-7.34674	0.648	0.453	C2		C12orf76	400073	1.41984e-83	-1.7746	0.097	0.419	C3
PADI2	11240	9.24756e-10	0.936872	0.411	0.345	C0		PLPPR2	64748	1.40696e-70	3.03532	0.82	0.634	C1		RALY	22913	0.00347856	-7.35625	0.966	0.88	C2		UBE2W	55284	2.31482e-128	-1.7749	0.094	0.513	C3
TTC37	9652	6.32604e-16	0.932793	0.619	0.524	C0		LYPLAL1	127018	1.24246e-83	3.03421	0.781	0.562	C1		CMTM6	54918	0.000959496	-7.37065	0.889	0.839	C2		ATP6V1H	51606	2.98848e-124	-1.77718	0.087	0.497	C3
FOLR1	2348	4.42569e-21	0.931187	0.355	0.257	C0		DDX1	1653	4.35414e-122	3.03419	0.922	0.741	C1		ZNRF2	223082	1.50299e-06	-7.37268	0.602	0.626	C2		SPSB2	84727	5.8366e-105	-1.77722	0.096	0.464	C3
PLXNB2	23654	4.27163e-11	0.931129	0.774	0.679	C0		SAPCD2	89958	2.51982e-246	3.03398	0.622	0.227	C1		MYO1E	4643	6.08457e-06	-7.37363	0.385	0.439	C2		C2orf74	339804	1.42004e-77	-1.77799	0.115	0.425	C3
DENND1B	163486	6.22829e-22	0.926904	0.44	0.335	C0		OIP5-AS1	729082	6.16697e-176	3.03268	0.806	0.502	C1		LYN	4067	0.000654347	-7.38227	0.503	0.526	C2		KIFAP3	22920	1.89094e-89	-1.77821	0.102	0.438	C3
GTF2B	2959	1.72177e-21	0.925038	0.705	0.579	C0		SMDT1	91689	1.01597e-173	3.02732	0.994	0.894	C1		LRP10	26020	2.95424e-12	-7.38981	0.798	0.789	C2		MED27	9442	9.598e-106	-1.77924	0.083	0.453	C3
RNF213	57674	2.95696e-05	0.924551	0.671	0.6	C0		ST3GAL1	6482	1.69728e-41	3.02729	0.313	0.17	C1		MAP3K5	4217	1.2719e-08	-7.41304	0.426	0.488	C2		ANKRD40	91369	1.41305e-88	-1.77986	0.133	0.471	C3
MIA2	4253	4.37209e-09	0.92433	0.565	0.494	C0		PRR11	55771	1.88096e-203	3.02713	0.47	0.139	C1		CCDC34	91057	6.42695e-70	-7.42096	0.934	0.695	C2		RELA-DT	105369347	2.18775e-96	-1.78023	0.113	0.464	C3
GALNS	2588	1.18019e-23	0.921764	0.594	0.476	C0		ABT1	29777	8.0413e-147	3.02419	0.834	0.57	C1		LENG8	114823	1.6996e-05	-7.43491	0.59	0.62	C2		VPS13A	23230	5.86199e-103	-1.78032	0.096	0.459	C3
PIAS3	10401	6.036e-31	0.921219	0.551	0.417	C0		DIAPH3	81624	0	3.02388	0.798	0.218	C1		DUS1L	64118	0.00090457	-7.44382	0.857	0.811	C2		VAMP4	8674	1.88049e-68	-1.78049	0.068	0.346	C3
SYT7	9066	1.3119e-23	0.919148	0.42	0.314	C0		IMP4	92856	7.46209e-306	3.0217	0.974	0.758	C1		ITGAV	3685	0.000201404	-7.44648	0.571	0.58	C2		RNF208	727800	4.07099e-110	-1.78167	0.087	0.466	C3
FADS3	3995	8.92652e-38	0.917904	0.49	0.353	C0		POLA2	23649	0	3.01991	0.691	0.19	C1		SHMT1	6470	5.92967e-05	-7.4555	0.796	0.695	C2		SLC22A31	146429	6.69893e-66	-1.78324	0.031	0.287	C3
HERC1	8925	0.000115009	0.915595	0.407	0.361	C0		NVL	4931	3.18514e-83	3.01989	0.727	0.504	C1		TMEM18	129787	0.00600764	-7.50437	0.889	0.831	C2		C12orf73	728568	2.43786e-98	-1.78361	0.139	0.503	C3
ZFYVE16	9765	2.36035e-05	0.906726	0.534	0.476	C0		UBR5	51366	5.40036e-94	3.01657	0.836	0.629	C1		MAST4	375449	1.41209e-18	-7.51681	0.468	0.567	C2		ADAT1	23536	1.75152e-96	-1.78364	0.101	0.454	C3
TMEM79	84283	3.90018e-56	0.889653	0.489	0.324	C0		DUSP23	54935	1.0793e-115	3.01356	0.881	0.682	C1		GNS	2799	9.55515e-07	-7.525	0.634	0.655	C2		HIRIP3	8479	1.49398e-57	-1.78438	0.099	0.352	C3
EPHA1	2041	2.15711e-56	0.888273	0.402	0.236	C0		TPR	7175	4.94099e-185	3.00759	0.923	0.7	C1		PEPD	5184	4.93311e-06	-7.53023	0.877	0.813	C2		NECAP2	55707	4.18663e-105	-1.78539	0.086	0.458	C3
KLC3	147700	1.63008e-19	0.887277	0.506	0.392	C0		FAM204A	63877	4.32594e-122	3.00614	0.846	0.636	C1		GALNT6	11226	5.09594e-05	-7.53332	0.788	0.774	C2		ORC3	23595	1.92984e-106	-1.7912	0.076	0.447	C3
PDRG1	81572	9.37823e-14	0.88665	0.528	0.563	C0		EID1	23741	8.64968e-232	3.00543	0.986	0.838	C1		SEC61A1	29927	4.51103e-09	-7.53645	0.765	0.756	C2		PTPN20	26095	3.73225e-104	-1.79123	0.083	0.451	C3
P2RX4	5025	1.57305e-09	0.877888	0.415	0.346	C0		NCOR1	9611	1.24825e-131	3.00507	0.9	0.702	C1		HHIPL2	79802	1.05526e-05	-7.54243	0.546	0.585	C2		RNF4	6047	2.75252e-83	-1.79124	0.118	0.442	C3
LRRC75A	388341	6.39835e-16	0.876996	0.443	0.514	C0		PSMB9	5698	6.57763e-79	3.00453	0.426	0.211	C1		C16orf91	283951	8.0889e-05	-7.54458	0.831	0.742	C2		FRYL	285527	2.16049e-100	-1.79199	0.099	0.46	C3
NKIRAS2	28511	0.00392504	0.871833	0.446	0.41	C0		TUT4	23318	4.71421e-101	3.00447	0.662	0.414	C1		KNSTRN	90417	2.63374e-48	-7.55683	0.572	0.353	C2		UBE3B	89910	1.25111e-96	-1.79546	0.096	0.446	C3
RAI14	26064	0.00012736	0.870204	0.432	0.474	C0		ELP4	26610	3.26741e-103	3.00358	0.595	0.33	C1		NIPBL	25836	0.00162054	-7.56091	0.85	0.781	C2		FASTKD3	79072	9.37498e-123	-1.79549	0.075	0.482	C3
RPS6KA4	8986	0.00475967	0.862923	0.479	0.442	C0		PRTFDC1	56952	4.16954e-230	2.9984	0.737	0.361	C1		ITGB8	3696	7.56471e-17	-7.57114	0.272	0.385	C2		MIB1	57534	1.38575e-89	-1.7958	0.106	0.443	C3
MEGF9	1955	2.39572e-16	0.8616	0.668	0.571	C0		MAIP1	79568	8.6351e-138	2.99502	0.814	0.559	C1		RAB38	23682	1.51093e-08	-7.59897	0.646	0.668	C2		ZDHHC16	84287	4.79157e-112	-1.79636	0.104	0.488	C3
FAM174B	400451	2.62516e-12	0.86111	0.493	0.407	C0		DIAPH1	1729	1.83865e-254	2.99417	0.927	0.669	C1		KIF20A	10112	3.18088e-84	-7.59951	0.429	0.168	C2		SRGAP2C	653464	3.96445e-75	-1.79678	0.079	0.375	C3
C5orf38	153571	3.42707e-07	0.859715	0.749	0.656	C0		EPHA2	1969	4.54454e-54	2.99326	0.491	0.305	C1		BHLHE41	79365	3.5052e-05	-7.6292	0.694	0.693	C2		PSMA3-AS1	379025	1.07922e-109	-1.7988	0.113	0.496	C3
EML2	24139	1.19024e-19	0.859411	0.439	0.335	C0		LINC01578	100507217	4.41548e-113	2.99218	0.924	0.758	C1		NUDT16	131870	0.00570104	-7.64695	0.69	0.668	C2		IQCK	124152	3.67432e-108	-1.79923	0.118	0.498	C3
SCYL1	57410	2.42054e-21	0.859398	0.809	0.687	C0		GINS1	9837	0	2.98892	0.68	0.15	C1		RPS6KA3	6197	5.71521e-05	-7.65468	0.586	0.607	C2		DCTN1	1639	6.16602e-110	-1.79977	0.125	0.509	C3
FNDC11	79025	2.17148e-38	0.852912	0.252	0.136	C0		PIGU	128869	1.01829e-200	2.98794	0.765	0.433	C1		FEN1	2237	6.20856e-29	-7.66571	0.669	0.434	C2		MTMR6	9107	6.33378e-95	-1.8002	0.111	0.458	C3
NAPA	8775	1.32537e-06	0.851157	0.811	0.716	C0		TMEM138	51524	3.83187e-160	2.98784	0.729	0.426	C1		KDM6B	23135	0.00104123	-7.66813	0.38	0.412	C2		MLLT3	4300	6.59418e-93	-1.80096	0.112	0.459	C3
ARNTL2	56938	1.04566e-07	0.850227	0.258	0.311	C0		GALNT11	63917	1.19115e-62	2.98676	0.772	0.593	C1		MMADHC	27249	0.000929381	-7.67028	0.935	0.887	C2		NUMB	8650	8.43121e-115	-1.80113	0.091	0.479	C3
STX4	6810	7.79187e-24	0.836111	0.607	0.491	C0		CMC4	100272147	1.28279e-211	2.98054	0.83	0.508	C1		PDK3	5165	0.00278094	-7.68992	0.534	0.551	C2		CEP78	84131	1.20487e-64	-1.80119	0.076	0.344	C3
MYCBP2	23077	9.82002e-07	0.83215	0.622	0.54	C0		CCDC115	84317	8.99353e-78	2.98028	0.786	0.582	C1		FOXM1	2305	2.17382e-38	-7.69111	0.57	0.335	C2		SPG7	6687	1.08855e-108	-1.80196	0.085	0.463	C3
PITRM1	10531	0.00838545	0.83148	0.475	0.442	C0		ILKAP	80895	7.87129e-240	2.97963	0.917	0.626	C1		BARD1	580	1.05996e-23	-7.70177	0.65	0.422	C2		LONP1	9361	1.32703e-96	-1.80301	0.097	0.449	C3
OCEL1	79629	1.00773e-77	0.830614	0.628	0.424	C0		DDAH2	23564	2.84217e-54	2.97394	0.903	0.752	C1		ZDHHC24	254359	5.13393e-09	-7.70411	0.865	0.824	C2		GFPT2	9945	6.79137e-53	-1.8048	0.049	0.276	C3
RHPN1	114822	5.14317e-24	0.82565	0.498	0.378	C0		CCDC137	339230	1.28503e-192	2.97128	0.828	0.533	C1		TMEM14A	28978	8.94544e-05	-7.70497	0.939	0.837	C2		CUEDC1	404093	1.98204e-95	-1.80488	0.114	0.468	C3
SMIM30	401397	1.65281e-13	0.824646	0.555	0.466	C0		REPIN1	29803	5.31473e-103	2.96845	0.885	0.717	C1		CIAO2A	84191	7.04021e-05	-7.70818	0.801	0.688	C2		IPO8	10526	1.49573e-86	-1.805	0.104	0.433	C3
RASA2	5922	6.23316e-06	0.821926	0.35	0.301	C0		CBX6	23466	6.95638e-131	2.96589	0.677	0.399	C1		EAPP	55837	4.40479e-13	-7.70952	0.848	0.832	C2		DPAGT1	1798	2.12511e-114	-1.80525	0.085	0.474	C3
TLCD1	116238	4.23019e-08	0.820283	0.657	0.572	C0		DCAF7	10238	5.09245e-107	2.95875	0.651	0.403	C1		MGAT1	4245	8.80244e-05	-7.72864	0.783	0.694	C2		ERLIN2	11160	1.67407e-96	-1.80565	0.111	0.465	C3
ATF6	22926	3.52237e-05	0.818007	0.474	0.423	C0		MAPK1	5594	1.36412e-187	2.95872	0.846	0.552	C1		PPP3CA	5530	4.72965e-11	-7.72937	0.872	0.854	C2		XPNPEP3	63929	9.50636e-120	-1.80582	0.096	0.499	C3
EXOSC8	11340	5.44476e-183	0.817468	0.585	0.741	C0		ANKRD13D	338692	8.37385e-77	2.95832	0.791	0.588	C1		TPRKB	51002	4.63521e-10	-7.73072	0.94	0.818	C2		CELSR2	1952	2.19319e-64	-1.80616	0.068	0.333	C3
VAV3	10451	2.01381e-51	0.816259	0.51	0.343	C0		NDUFS7	374291	3.6914e-231	2.9553	0.986	0.846	C1		ITGB3BP	23421	2.13303e-46	-7.73218	0.902	0.653	C2		CASTOR2	729438	1.14036e-80	-1.80695	0.114	0.432	C3
PLEK2	26499	1.88543e-19	0.813682	0.534	0.589	C0		SZRD1	26099	2.35003e-132	2.95028	0.79	0.519	C1		ACOT8	10005	6.8788e-10	-7.73962	0.739	0.743	C2		DDX55	57696	1.01205e-99	-1.8087	0.089	0.448	C3
[truncated: 6,637 more rows]

## Sheet: Table S3
DEGs(TCGA LUAD)	log2FC	AveExpr	p-value		DEGs(PC-9s)	p-value	avg_log2FC	pct.1	pct.2		up/down	DEGs(intersect)
GPR87	1.69488	1.71541	1.30127e-10		KRT19	1.00128e-182	Inf	0.999	1		up-regulated	KRT16
LYZ	1.63148	7.05188	9.7366e-10		S100A11	1.39596e-102	Inf	0.999	1		up-regulated	KRT6A
MMP7	1.62277	4.16256	9.38302e-07		MGST1	7.64649e-67	Inf	0.998	1		up-regulated	GADD45A
PLAU	1.59227	5.0953	2.72834e-09		TPT1	1.79584e-63	Inf	1	1		up-regulated	FGFBP1
ANKRD22	1.58177	3.02733	8.40967e-13		SLPI	3.31381e-62	Inf	1	1		up-regulated	ANXA1
G0S2	1.55869	4.36831	1.66732e-09		CSTB	1.11307e-61	Inf	0.998	1		up-regulated	AREG
CD44	1.4927	4.84609	3.15661e-30		LCN2	2.07207e-52	Inf	0.995	0.992		up-regulated	CST6
S100A9	1.46937	7.38601	7.36728e-06		RPS18	3.64698e-46	Inf	1	1		up-regulated	CD44
AREG	1.43343	3.75344	6.03558e-06		RPL28	1.72542e-35	Inf	0.999	1		up-regulated	ITGA2
GJB2	1.4129	3.06894	6.19608e-09		PI3	1.32576e-33	Inf	0.913	0.894		up-regulated	CLDN1
AIM2	1.39248	1.96697	5.52087e-11		RPL37	5.92751e-31	Inf	1	1		up-regulated	IL18
EREG	1.3884	1.1938	2.25202e-07		RPL7A	1.66118e-30	Inf	1	1		up-regulated	FXYD5
CDA	1.38706	2.75976	1.00046e-06		AKR1B1	2.3731e-30	Inf	0.999	1		up-regulated	CDA
S100A8	1.36863	3.56297	2.29834e-07		RPL26	1.15493e-27	Inf	1	1		up-regulated	ANKRD22
ITGA2	1.35751	3.46588	1.69427e-09		RPL30	7.99988e-26	Inf	1	1		up-regulated	RAC2
TGFBI	1.35244	4.54743	1.21115e-10		SPRR1B	9.05755e-25	Inf	0.664	0.587		up-regulated	CD40
CDH3	1.3269	3.70157	9.30978e-07		RPL19	1.91153e-24	Inf	1	1		down-regulated	CIT
MYO1G	1.31552	2.2919	9.99553e-11		RPS13	1.00031e-22	Inf	1	1		down-regulated	ALCAM
CRYBG1	1.28364	2.71698	7.40459e-13		RPS4X	4.31e-22	Inf	0.999	1
BIRC3	1.27755	3.22883	1.8315e-11		SPRR3	3.47193e-20	Inf	0.75	0.708
TNC	1.26942	4.27566	2.89827e-05		EIF1	1.35753e-19	Inf	0.999	1
COL17A1	1.26516	1.9644	5.21204e-06		RPS12	1.78889e-19	Inf	1	1
C15orf48	1.22857	4.54377	3.3834e-05		RPL12	8.50522e-18	Inf	1	1
SAA1	1.20901	3.06145	0.000205143		KLK6	1.69708e-17	Inf	0.995	1
SHISA3	1.20063	1.80548	0.00100455		MT-ND3	7.37893e-15	Inf	1	1
CD40	1.17959	3.59785	8.42713e-12		RPS23	3.09722e-14	Inf	0.999	1
PDLIM4	1.17571	2.59255	2.45479e-09		MT-ND4	8.01347e-08	Inf	0.999	1
ANXA1	1.17487	5.57928	3.64663e-08		RPS3	1.19962e-07	Inf	1	1
CXCL10	1.17358	4.09944	3.29944e-05		RPS27A	1.6798e-07	Inf	1	1
ADGRF1	1.17023	2.1201	3.5116e-05		RPS5	1.15853e-06	Inf	0.992	0.999
TNFAIP2	1.16713	4.5319	1.35234e-07		KRT6B	1.0388e-29	856.991	0.797	0.712
IFI16	1.15453	4.28842	7.70361e-12		SAA2	1.11511e-09	837.784	0.275	0.195
CST6	1.15254	3.02291	4.55266e-05		KRT16	4.4586e-110	831.023	0.902	0.794
FGFBP1	1.15207	2.01177	1.99182e-05		KRT6A	3.37076e-18	784.673	0.363	0.249
CD274	1.15134	1.83927	4.88384e-12		GADD45A	3.94295e-07	774.213	0.531	0.606
KCNN4	1.12834	3.63858	4.59339e-06		PERP	9.82872e-43	696.852	1	1
CXCL11	1.12472	1.777	2.36318e-07		ZFAS1	2.49444e-17	692.524	1	1
UBD	1.12458	2.97798	1.51131e-05		LGALS3	1.13266e-121	652.101	0.998	0.999
HCK	1.12415	3.20647	3.33859e-11		MT-ND2	1.66505e-08	603.077	1	0.999
NT5E	1.11924	3.56039	1.06689e-05		RPL15	8.04494e-29	571.311	1	1
MET	1.11799	4.49279	6.35673e-05		RPL35A	2.10412e-17	506.416	1	1
KRT6A	1.11653	1.92372	0.00258282		RPS8	5.71403e-17	504.519	1	1
IFI44	1.11559	3.81917	4.81099e-07		RPS7	7.24022e-09	489.104	0.999	1
FOSL1	1.1124	2.11541	2.91567e-07		CST3	1.63915e-84	489.077	0.999	1
SRPX2	1.11202	3.16357	4.6859e-07		S100A14	5.63611e-50	483.333	1	1
GBP1	1.10925	3.61075	8.04228e-08		S100P	3.97172e-70	481.684	0.99	0.981
CSF2	1.09867	1.42332	2.5008e-09		RACK1	1.79479e-25	479.005	0.999	1
CCL13	1.09701	3.16128	3.24916e-06		SSR4	1.15081e-61	477.111	1	1
CXCL9	1.09444	4.19441	0.000543366		KLK5	4.29254e-76	467.464	0.997	0.998
CCL17	1.09411	1.95364	2.43389e-06		GLRX	9.30698e-63	467.464	0.948	0.906
LAMC2	1.09181	4.82602	5.39204e-06		FGFBP1	1.4588e-91	466.017	0.616	0.332
GJB3	1.06413	1.70187	4.68159e-06		SFN	5.51131e-21	458.807	0.99	0.994
CHI3L1	1.06285	4.72431	0.000288622		RPL18A	3.16691e-41	458.8	1	1
MMP28	1.06164	2.36396	0.000235474		UPP1	1.4231e-27	451.141	0.738	0.858
ALOX5AP	1.05808	4.05041	8.32978e-10		RPL6	1.25782e-14	448.709	1	1
HLA-DQA1	1.05075	4.65558	1.36926e-06		RND3	1.64431e-11	447.247	0.786	0.746
AFAP1-AS1	1.04873	3.02288	0.000217243		UBC	3.75447e-81	444.38	0.998	0.994
RRAD	1.04834	3.22139	2.55536e-05		RPS28	3.32087e-17	435.724	1	1
COL6A2	1.03806	5.90885	8.8414e-07		RTN4	2.12122e-50	434.095	0.999	1
FXYD5	1.03513	4.88656	3.04316e-11		RPL13	1.25704e-26	431.396	1	1
CYBB	1.03314	4.06073	1.176e-07		CXCL8	3.95361e-09	416.969	0.424	0.346
HLA-DRB1	1.02953	8.76647	1.5044e-06		RPL32	3.41511e-32	411.195	0.999	1
CX3CL1	1.02746	3.60566	2.45635e-05		OTUD1	7.91768e-33	395.534	0.513	0.348
KRT16	1.02276	1.33448	2.85561e-05		MT-ND1	1.16767e-11	395.329	1	1
PDZK1IP1	1.02233	5.17626	5.71361e-05		ACTB	1.40738e-32	388.115	1	1
ITGB2	1.02166	4.43209	3.64553e-08		TMEM45A	9.59826e-13	383.786	0.846	0.794
HLA-DRB5	1.02055	7.1674	6.494e-05		AKR1C1	2.0384e-12	383.774	0.929	0.94
SH3RF2	1.01973	1.22111	1.05455e-11		ATP5F1E	5.95756e-50	382.274	1	1
IL18	1.01595	2.9384	1.21115e-10		S100A12	3.81693e-20	380.902	0.7	0.624
ITGB4	1.01392	4.62149	3.87194e-06		PHLDA1	1.61749e-31	379.724	0.812	0.742
IDO1	1.0139	3.09157	0.00018961		RPL24	1.78662e-27	378.017	1	1
SAMD9L	1.01365	2.53341	5.95047e-10		RPL9	1.58382e-20	372.246	1	1
CLDN1	1.01308	4.11288	3.80966e-05		CEBPB	7.31913e-107	369.359	0.998	0.998
LTB	1.01224	3.34604	4.76409e-07		SERPINE2	2.52086e-11	362.147	0.916	0.912
RAC2	1.01131	4.57863	5.91887e-14		TIMP1	5.5575e-38	346.277	0.977	0.971
CASP1	1.00813	2.72285	1.58884e-14		RPL29	3.64909e-47	336.083	0.999	1
GADD45A	1.00735	4.0887	1.26002e-09		SEC61G	5.44526e-38	331.78	1	1
HLA-B	1.00404	9.21656	3.53094e-09		H3F3B	4.16897e-26	331.337	0.992	0.998
ADAM8	1.00045	3.58605	2.68462e-07		HMGCS1	1.44049e-51	330.408	0.971	0.95
UNC13B	-1.00287	4.13397	3.27225e-09		RPS9	5.37279e-49	320.273	1	1
CYP2B7P	-1.01023	4.1915	0.00458711		RPL11	1.33703e-18	318.866	0.999	1
HES6	-1.01705	3.12524	3.22014e-05		ANXA1	9.85617e-17	315.981	0.994	0.999
CABYR	-1.01878	1.59888	7.73906e-07		B2M	1.29762e-18	315.977	0.998	0.999
AKR7A3	-1.01933	1.83098	0.000197948		RPS27	8.2736e-35	313.095	1	1
KCNE4	-1.02018	2.04704	1.23984e-05		RPS15A	1.4344e-11	310.21	1	1
FASN	-1.0207	5.06145	4.81479e-08		MYL6	4.71018e-28	309.669	0.999	1
IRS2	-1.03243	2.84754	1.22666e-07		RPLP1	1.96679e-06	300.111	1	1
FSTL4	-1.03244	1.32222	3.42647e-06		ANXA2	1.98063e-20	297.226	0.998	0.999
ALDH3A2	-1.03478	4.64491	3.6483e-08		GNAS	3.77285e-58	297.226	1	1
INHA	-1.03625	1.19782	5.30795e-05		RPS24	2.03811e-16	294.34	0.999	1
SST	-1.0377	0.723503	0.00233314		TUBB4B	1.21844e-176	278.471	0.991	0.997
TSPAN11	-1.04546	1.96289	7.88611e-06		SCD	1.52583e-58	277.107	0.991	0.988
GPT2	-1.04588	3.25165	2.14332e-07		RPS21	2.65486e-07	277.028	1	1
KLK14	-1.0471	1.03647	0.000216701		BCAP31	3.55397e-34	275.133	0.998	1
RAP1GAP	-1.0481	3.70218	2.0152e-05		TMSB10	6.37079e-22	272.7	1	1
ALG1L	-1.04864	2.8682	4.50335e-06		CITED2	6.803e-38	269.719	0.778	0.662
CIT	-1.0604	3.0447	2.13741e-05		DKK1	1.60926e-31	266.929	0.671	0.539
PLA2G10	-1.06371	1.87213	9.99371e-06		RPL13A	7.7352e-14	266.809	0.998	1
GADD45G	-1.06516	3.77686	9.82579e-08		KRT23	4.66288e-26	266.474	0.615	0.49
CRYM	-1.06935	2.32251	3.35416e-05		RPL27	1.69992e-18	265.926	1	1
CNGA3	-1.07492	1.00212	5.06422e-07		RPL3	2.45708e-59	264.053	1	1
COL25A1	-1.07571	0.76619	7.92052e-09		KRT7	5.78765e-81	253.934	0.998	0.998
IGFBP2	-1.08693	4.61871	0.000650623		NACA	1.23291e-22	252.502	0.999	1
CXCL17	-1.08905	7.26529	0.000971246		CTSV	1.30639e-06	251.692	0.527	0.611
ATOH8	-1.09247	2.01924	8.69445e-07		TSC22D1	2.23786e-33	249.536	0.966	0.952
TACC2	-1.11301	2.63546	4.23752e-13		EEF1D	3.30638e-16	248.174	0.999	1
MAOA	-1.11635	4.09735	1.32559e-06		INSIG1	5.77611e-39	243.846	0.94	0.904
LGSN	-1.11998	1.70106	1.33632e-07		DYNLL1	5.24957e-63	242.403	0.998	1
TESC	-1.1216	4.0639	0.00171629		IDS	3.04219e-55	242.191	0.992	0.99
CBR1	-1.12316	5.3339	1.7183e-05		RPS14	5.93154e-40	240.96	1	1
DUSP4	-1.1284	3.2712	1.73744e-05		HSPB1	3.86032e-50	240.96	1	0.998
OTULINL	-1.13846	2.92076	5.0486e-09		DEFB1	2.52667e-37	235.19	0.523	0.349
FXYD4	-1.14113	1.03445	3.86067e-06		RPL23A	1.48068e-07	233.747	1	1
SLC14A2	-1.14823	0.739004	2.81363e-08		RPL34	1.70613e-38	233.747	0.998	1
C9orf152	-1.14938	2.84166	2.96326e-08		NEAT1	7.39405e-57	232.303	0.993	0.987
ENO3	-1.15325	1.64739	4.31849e-08		MSMO1	2.06635e-163	230.862	0.99	0.977
SCNN1A	-1.15362	5.70375	1.09359e-07		KDELR2	3.0416e-19	227.976	0.998	0.999
TFCP2L1	-1.16473	2.81048	1.36667e-07		OLFML3	8.54127e-08	226.532	0.985	0.998
LARGE2	-1.1672	3.47947	7.0373e-09		NAMPT	4.02315e-20	220.763	0.994	0.998
BMP6	-1.17026	1.80295	1.59704e-06		FAU	6.88536e-17	220.763	1	1
CEACAM6	-1.19166	8.22673	0.000587013		AGR2	2.09429e-56	219.32	0.958	0.955
CLDN3	-1.19659	5.77476	1.61007e-06		DSTN	7.83229e-37	218.974	0.999	1
BPIFB2	-1.19669	1.51266	0.000593367		ATP6V1G1	1.20698e-90	217.817	0.998	0.998
ST6GALNAC1	-1.21854	4.01829	1.44181e-06		RPS3A	2.20456e-11	217.435	1	1
ATP1B1	-1.22319	7.54371	8.31195e-10		YBX1	8.83937e-17	216.435	1	1
PARM1	-1.23231	4.89479	2.48593e-07		CIAO2B	1.44925e-10	216.398	0.998	0.998
BARX1	-1.25022	1.9613	0.000773142		PMAIP1	4.23591e-09	214.992	0.477	0.576
KLK11	-1.25725	2.42624	0.000481701		AREG	3.92713e-07	213.987	0.445	0.39
WIF1	-1.27633	1.77342	4.43928e-05		GSTM3	3.78879e-20	213.549	0.992	0.998
PCSK2	-1.28437	0.970389	0.000235096		SNHG29	6.69317e-33	212.107	1	1
SOX2	-1.30098	2.55345	1.36057e-05		SH3BGRL3	5.80746e-68	208.738	0.997	0.998
GFRA3	-1.33816	2.40282	0.000197999		PHLDA2	1.36859e-27	207.778	0.988	0.987
AKR1C1	-1.35818	2.57997	0.00161658		H1FX	1.30662e-78	204.438	0.803	0.933
ODC1	-1.36029	5.95292	1.25013e-07		CALM2	1.66773e-23	203.902	0.998	0.998
CACNA2D2	-1.38296	2.54158	1.23471e-06		RPS25	2.90122e-10	203.45	1	1
SFTPB	-1.4014	9.76481	0.00298042		SLC3A2	7.42021e-13	201.549	0.96	0.973
AGR2	-1.40689	6.93925	1.19697e-05		RPL36	5.74381e-16	200.32	0.999	1
HMGB3	-1.40957	5.82911	8.90986e-10		SPTSSB	2.06387e-44	197.68	0.899	0.858
AKR1C2	-1.42653	2.51007	0.00273112		RPL5	8.82017e-09	193.352	1	1
SLC7A2	-1.433	2.91373	1.57976e-06		SPINT2	1.33254e-37	191.909	0.999	1
TFF3	-1.44753	4.76215	0.0018407		CD63	2.11627e-75	190.649	1	1
PLA2G4A	-1.45092	3.84725	6.12674e-08		SQSTM1	1.13333e-09	187.316	0.996	0.997
FGA	-1.45207	2.63819	0.00136829		GUK1	5.13612e-34	184.077	1	1
SYT7	-1.4896	3.16252	3.56457e-10		SLC30A1	2.26906e-37	182.308	0.703	0.571
CPS1	-1.50384	1.5635	0.00019946		MT-CYB	8.97426e-25	180.437	1	1
ALCAM	-1.53709	5.15106	1.27019e-32		CNFN	3.40337e-33	177.509	0.64	0.496
GKN2	-1.53734	1.56336	3.33626e-06		SGK1	1.3465e-21	176.274	0.36	0.223
AQP3	-1.55202	6.76457	2.55166e-07		NDUFA4	5.08069e-29	176.039	0.999	1
RASD1	-1.55273	4.91503	1.21753e-06		PSMA7	5.50959e-09	176.039	1	1
ASCL1	-1.56027	1.18542	2.06433e-05		DBI	1.6251e-19	171.711	0.999	1
SLC16A14	-1.6348	2.31078	5.24723e-10		RPLP2	3.59782e-08	171.701	0.999	1
DRAIC	-1.64578	1.47875	3.50648e-10		LAMB3	7.43672e-08	171.682	0.222	0.302
LINC00593	-1.64578	1.47875	3.50648e-10		LGALS1	2.62578e-09	165.94	0.997	1
PCAT29	-1.64578	1.47875	3.50648e-10		RPL21	1.47751e-14	165.818	0.999	1
KLK12	-1.65346	1.51219	1.88976e-05		SOD2	1.43354e-12	161.411	0.869	0.854
CLIC6	-1.67004	4.68468	1.18413e-08		CRABP2	8.1873e-55	161.402	0.988	0.99
ELAPOR1	-1.70393	2.96611	2.07958e-09		ARL4A	2.90375e-44	161.001	0.914	0.822
DSCAM-AS1	-1.72485	1.20308	4.95031e-07		FXYD3	8.64503e-90	158.727	0.997	1
LINC00676	-1.72544	1.18657	3.89553e-06		LY6D	9.94419e-38	157.284	0.979	0.984
KIT	-1.83716	3.10837	4.19986e-11		EEF1G	7.72631e-22	154.424	1	1
FGL1	-2.00275	2.03261	2.97724e-08		CETN2	2.90899e-23	148.784	0.973	0.966
CALCA	-2.01426	1.4778	8.79053e-06		CST6	1.17878e-39	148.441	0.903	0.845
FGG	-2.05336	3.79984	4.2031e-05		CKB	5.67564e-13	146.932	0.865	0.922
TMEM59L	-2.09034	2.32914	1.40182e-10		HSPA5	1.10565e-27	146.663	0.969	0.954
MSMB	-2.15786	3.37206	1.57273e-05		RPS11	1.17245e-27	145.743	1	1
BPIFA1	-2.18592	4.23458	0.00016753		RPL37A	3.05962e-35	145.743	1	1
S100P	-2.20612	5.35595	3.45817e-06		BTG1	5.65777e-44	145.738	0.875	0.83
CRLF1	-2.87431	3.85564	1.69411e-11		EIF4A1	9.81578e-09	142.857	0.999	0.999
PGC	-2.8973	4.52275	5.93434e-06		CKS2	6.09874e-285	142.857	0.723	0.967
					HSPD1	8.49333e-112	142.857	0.996	1
					RPL22	1.92694e-23	141.857	0.999	1
					SLC25A5	9.51728e-46	141.415	0.998	1
					H2AFZ	0	141.335	0.995	1
					CD24	4.86191e-20	139.895	0.983	0.987
					CAV1	2.46339e-33	139.709	0.36	0.55
					CLU	1.07571e-39	139.411	0.968	0.953
					SQLE	8.37013e-45	139.126	0.964	0.963
					ZFP36L2	8.95073e-40	136.392	0.955	0.941
					RPL17	3.8268e-12	135.644	0.999	1
					DSC2	1.41359e-13	135.405	0.634	0.561
					YWHAB	1.42168e-09	134.201	0.999	1
					COX4I1	2.04656e-07	134.061	0.999	1
					CAMK2N1	1.16439e-17	132.685	0.989	0.998
					ODC1	2.50956e-74	131.314	0.522	0.781
					G6PD	2.49375e-23	130.823	0.992	1
					ATP6AP1	1.3056e-57	130.347	0.993	0.991
					TMEM154	2.8128e-79	129.146	0.862	0.741
					PLK2	4.09965e-07	128.156	0.867	0.849
					ENO1	2.03912e-08	126.991	0.998	1
					PHLDB2	1.07231e-07	126.533	0.752	0.8
					TOMM20	9.76017e-14	122.659	0.999	1
					TPI1	6.08997e-28	122.659	0.996	1
					ATOX1	2.06554e-24	122.476	0.997	0.999
					S100A16	2.70692e-50	121.488	0.998	1
					IER3	2.69865e-16	121.191	0.966	0.975
					UBA52	1.57699e-37	119.614	1	1
					RPS15	5.58205e-19	118.331	1	1
					COMT	3.20978e-43	118.331	0.992	0.999
					EIF4A2	2.02433e-29	118.3	0.977	0.951
					LYPD3	2.35217e-83	117.503	0.964	0.926
					CFD	1.68929e-83	116.889	0.959	0.921
					SERF2	6.73894e-66	115.446	0.998	1
					COX5B	2.50455e-27	114.003	1	0.999
					UBL5	1.76916e-38	113.653	0.999	1
					PPIF	1.3293e-64	113.343	0.824	0.936
					CYP51A1	9.25632e-17	112.56	0.969	0.971
					VPS28	5.51142e-59	112.365	0.979	0.954
					CYCS	8.81277e-16	111.83	0.995	1
					GABARAP	1.04196e-34	111.113	0.998	0.998
					SNHG1	2.74206e-41	111.031	0.571	0.756
					TACSTD2	2.63561e-30	110.675	0.983	0.984
					RPL10A	1.57865e-55	110.647	1	1
					RPS6	1.15621e-20	109.685	1	1
					MAFF	9.14789e-07	108.482	0.479	0.41
					TXNIP	5.42836e-11	107.622	0.892	0.915
					EGFR	3.72867e-08	106.963	0.939	0.94
					RPS29	3.36428e-15	106.79	1	1
					CD59	2.3241e-46	106.775	0.999	0.998
					ARF4	1.56086e-55	106.754	0.989	0.974
					CYB5A	9.45187e-36	106.605	0.99	0.995
					SDC4	1.89994e-16	106.189	0.98	0.981
					YIF1A	3.99107e-58	106.101	0.99	0.984
					HOPX	3.11466e-75	105.276	0.858	0.735
					NDUFA13	7.32512e-39	105.273	0.999	1
					ITM2B	1.26621e-66	105.266	0.995	0.993
					H2AFJ	3.02421e-38	104.886	0.99	0.994
					KRT15	4.74391e-18	103.483	0.861	0.818
					VTN	7.91927e-23	102.629	0.408	0.275
					EIF5	2.18628e-23	102.471	0.99	0.999
					RABAC1	2.71941e-68	102.433	0.985	0.966
					CSDE1	5.58137e-07	102.391	0.999	0.998
					MYL12A	6.1444e-15	101.019	0.995	0.999
					CYP1B1	6.11686e-13	100.836	0.847	0.832
					LAMTOR5	9.19368e-55	100.298	0.998	0.999
					AKR1C2	4.36478e-10	99.5759	0.94	0.965
					PRDX5	7.58103e-71	98.4904	1	0.999
					BST2	1.21735e-12	97.5045	0.98	0.99
					PPIC	1.94174e-28	96.6847	0.967	0.968
					PDCD6	4.09821e-20	96.2386	0.999	0.999
					MALL	1.44632e-28	95.6227	0.857	0.829
					UQCRQ	5.35777e-12	95.1165	0.999	1
					S100A4	4.0332e-18	93.8056	0.975	0.98
					RNASEK	2.20612e-34	93.8031	0.998	0.999
					KTN1	3.42324e-22	93.4951	0.992	0.994
					ATP5MD	3.84525e-20	92.3596	0.996	0.998
					SQOR	9.8959e-21	92.3587	0.844	0.795
					LDLR	1.55444e-43	92.2421	0.887	0.832
					ADM	2.24478e-13	91.7773	0.172	0.268
					CREB5	5.48268e-22	90.6506	0.708	0.61
					HSP90AB1	5.96259e-35	90.4679	0.998	1
					NDUFS5	1.65931e-11	89.4777	1	1
					RARRES1	9.52136e-10	89.4571	0.294	0.214
					TMBIM6	2.44406e-23	89.4503	0.999	0.999
					MT1X	2.82754e-27	89.3132	0.31	0.473
					NDRG1	2.04771e-22	89.2939	0.456	0.315
					OST4	4.60451e-46	89.2851	0.999	0.998
					COX7A2	8.98976e-24	89.0182	0.999	1
					CTSL	8.85813e-35	88.89	0.941	0.913
					AQP3	2.09353e-23	87.9205	0.736	0.65
					ITPRID2	1.64294e-47	87.1262	0.941	0.912
					DHRS9	4.73091e-39	86.8294	0.478	0.292
					PRELID1	1.99021e-08	86.5921	0.999	1
					GPX4	1.56239e-07	86.5916	0.999	1
					P4HB	9.24081e-22	85.9889	0.998	0.999
					CASP14	2.34454e-57	85.1434	0.559	0.338
					PABPC1	3.82406e-09	85.1397	0.999	1
					ATP1A1	1.11937e-25	85.1094	0.998	0.999
					RBCK1	1.94952e-42	83.9669	0.995	0.994
					SPTSSA	2.31324e-103	83.7345	0.989	0.988
					SERP1	3.73771e-25	83.7069	0.996	0.998
					POMP	6.91386e-07	83.7067	0.998	0.999
					PPIB	2.1839e-18	82.8882	0.992	0.996
					PPDPF	2.03072e-48	82.5452	0.999	1
					RPL23	7.18827e-08	82.264	0.998	1
					CD164	1.16754e-39	82.2536	0.992	0.992
					PFDN2	2.28534e-11	82.2511	0.993	0.998
					EEF2	5.35406e-27	82.2386	0.995	0.996
					HMGN1	4.45425e-24	82.1971	0.991	0.998
					OCIAD2	5.21152e-12	80.8207	0.991	0.991
					DHCR7	1.67616e-42	80.7693	0.971	0.978
					SEC61B	3.15887e-28	80.7599	0.999	0.999
					HINT1	1.26366e-19	79.3523	0.999	1
					PIK3R3	2.055e-49	78.9133	0.901	0.829
					RPL38	9.26478e-36	77.2974	0.999	1
					BZW1	1.20319e-10	76.9596	0.997	0.999
					RHOD	9.01234e-25	76.8856	0.98	0.972
					CCT8	2.0097e-07	76.8404	0.971	0.978
					TALDO1	1.56564e-36	76.4931	0.996	1
					ROMO1	6.77325e-25	76.0415	0.992	0.989
[truncated: 2,338 more rows]

## Sheet: Table S4
DEGs (C0toC2 vs C2toC0 | RNA Velocity-C2)	p_val	avg_log2FC	pct.1	pct.2
[truncated: 207 more rows]

[truncated: 1 more sheets: Table S5]
